# Supplementary material
Source: publisher figshare collection journal article supplement (https://gsajournals.figshare.com/ndownloader/files/22150419)
Supplement: Supplementary file 1 [file 22150419]

## Sheet: ArD2 secreted as per Shah et al
KZM18260.1	>ST47_g10596	MFQLLRALALIVVVTPAATHATSEGDPALANIPSDVGPGATAPVRPFRLEQVRLGKGLMQEKRDRVKNFVRTYDERRFLVLFNQVAGRANSSSLDPPGGWEDGGLLSGHWTGHYMSALSQAYVDQGETIFKSKLDWIVAELAACQEAYTANQRTTHPGYLGALPEDTVLRFGPPRFAVYGSNLTTNTWAPWYTQHKIIRGLLDAYYNTNNTQALQVVLKMADWAHLALTIGDKNQPGYQGNLTRSDLNYMWDTYIAGEFGGANEVFSEIYGLTGDEKHLETAKAFDNRESLFGAAVADQDILVVTPQNKPGRRRAERLHANTHVPQFLGYLRVYEYGGAGEYLTAAKSFFSWIVPHREFASGGMGGNYPGAKPNPELFQNRDNIANAIADDGAETCTTY…
KZM18282.1	>ST47_g10579	MMLPRCTTWLALLLAVTNTVAQTTTSCNPTEKTCPDDTALSSSTYTHDFTTSGADDNAWNVTAGKVTYTSSGAEFTINKPGDAPTIQSKWYIFFGRVSFFVKAASGTGIVSSAILESDDLDEIDWEWLGGTNYASTCQSNYFGKGNSSSYDRAAWAAVTSTQTTTHNYTISWTSSATTWYIDQVAVRTLAYADAVSGTNYPQTPMNIRIGIWAGGDSANDPGTIEWAGGETNYGDGPYTMYLEKIEVVNENPGASYSYGDRTGDYTSIQVSDAEDADAASVSSSSSASTSASGSAQSSSATASSSASGTSAASTTPAVSTTSAASTTGSLTGTVRTTPSASLSALAQAAASPAVRVGADIWRLVHTIPSGASLARFLQKYNYQDPLDNTKLDNYADMTG…
KZM18298.1	>ST47_g10582	MKLTALAAAFIVQYASAHYFFDTLIIDGAESKPLEYVRENTRAAKYNPTKWKNIRNDMTPDMTVPVQQGRFRIYEESECNPSGDFGKNPWCTWDKNQIEFPVPTGTPDGEYLIRSKHIGVHGAHNS
KZM18300.1	>ST47_g10580	MQFKVIAASLLASAGLSMAAPLQAREETCPVVEQGDYVWKIDNFSARKLDGKTISSLSFNVKATNGGTLDFDCTSSDPVEDGKFYECGENSFIYFAYQADRSGLLLRQDVSDDIQYVATTTLPDYCHAGGSGPNDYICQGVSPAYITLVQYPGKLQ
KZM18311.1	>ST47_g10544	MYASMIFSAVLAASFASAAPAGKRGSGLSPDGNYFPLANGFPNPNREGEITIQDGAHGTLPNGPPPPALSAEGVTNLKLIALNELFEVAFFTELIYNVTNKVSGYDLGMGHDYMLDSLNAIVNQEELHVLNANGALEHFNQEKIQPCKYNFPVQDFQSAIALAGTFTDIVLGTLQDVNQIFAKNQDDGLVRAVTSVVGNEAEQEGFFRLMQKKRPSSQPFVTTATRDFAFTAIQDFAIEGSCPNIATIPLKRFKPLKVETKTIPAENQNLKFSFDMKDVGMYDTNDMRLAYLNGQNQPIVKNFENIKMEGEKVFFEAPFPYDDFLMNGLTIAAVTMGADEFADADKMAEAAVFGPGLIEID
KZM18319.1	>ST47_g10534	MKVSQTWTALLSTALVAIAAPIAENCTLEADYDVIVVGSGPAGIIVADRMSEAGKKTLLLEQGGPSYYVTGGRERPDWLNGTELSRVDVPGLYKSIFSVTGNLTCASDVVNAFQGCTVGGNTAINAGLFFQPPASDWDLYFPTGWKNSDMQSAIAKVHAKQPSTDNPSADGKRYLQSGYHVAKEWLVEGAGYADVGLNDGWENHQKTKVFGHPIYNYEGGQRSGPAKTYLQSALQRPNFHFQTGTKVIRVIRDGQTATGVEIQIKGSNATSIVNMAKSGRVVLSGGALLSPQLLMWSGIGEAATLGNLSASGQLTLPASQWINNSAVGDKVFDNPNTFIELFSDSISSYNYNYTDPIPADRELYLKSRSGPYSFGSQTSAFWDFIKQGNETIGCQGTID…
KZM18333.1	>ST47_g10526	MYLRTSAVSAALWLAVSATPTYGSSTNTTIEFKHWPANASRALSNMIVQNANQSNYAVFDMDNTSYRYDLEESLLPFLENRGILTRENLDPTLKLIDFKDTANFTETLYSYYLRLCEDDDFVCYPWAAQVWSGFTLRELKGYVDELMALNTTIPTQYWDGDEVVNSTVNSPQVFRGQAELYNALMDNGIAVYVISAAHEELVRMVASDPKYGYNVPPQNVIGVTTMLVNSTSGFLTNARKQIVEGNYDPEANLDLVLGPYLWTPATWFAGKWAAILTYIDQWKRPVLAAGDTPGSDSYMLFHGVDTAKGGIHLWINRRDAYWEEMQGEIRNNTAAQIANGREVTADKNWVVVKPADIL
KZM18381.1	>ST47_g10513	MLSRRFLSLAAWLVAFAAAQSCVTDNDCSLNGLCLPSTKTNATSTCRCDPGWFGDDCGRLDLAPAARYTGFNETNATAPNHYSNRGNSSWGGQIVQDRDDPKLFHLIYDQFAYGCGLSGWRPTSFIARAESTSGPQGPYIWRQNITSSFRHNAYVYWSPADRKYLLWSIGVNIPDPKQCGGINKAQWPNNISVSSAPTIRGPWAPFKILINGTNPAPAPLWSPNHPTGETILAAEDLSIFTAPSYDGPYKQVFSAPWNTSNYSPTWAEDPFLWRDKRGHWHALAHWMIDITERGVKYPRVGTHMYSRNLTGPWTFKLQEAFNSTVNFTDGSVETFNRRERPKLFFSDDGEVTPLYMVNGVQRLGSSTESYTLVQPVGNKWRELEAGLGFS
KZM18388.1	>ST47_g10490	MVKSGLIAAFAAYAHVTQAACPFMDNDARDVPASHPQVKRADGSYDVPSNTNEFMSRFEVNDTGVYMTSNSGTPIEDQESLSAGERGPTLLEDFIFREKIMHFDHERVPERAVHARGAGAHGVFTSYGDWSNITGASFLSTPDKETPVFIRFSTVAGSRGSADTVRDVHGFAVRFYTDEGNFDVVGNNIPVFFIQDAIKFPDLIHAVKPRPDNEIPQAATAHDSAWDFFSQQPSSLHTLFWAMSGHGTIRSFRHTDGWGVHTFRFVTDEGKTKLVKFRFRTLQGKASLLWEEAQVTAGMNADFNRQDLFDSIENGLFPEWVFEAQIMEEDDQLRWGFDLLDPTKIVPEDIVPFTPLGKLTLNRNPRNYFAETEQIMYQVGHVVRGIDFTEDPLLQGRLF…
KZM18407.1	>ST47_g10531	MRLHAALSLAACLAPVSAIFEDDAYHIDFHYALLGLPKRDATFFQKPYGGSKASLLYSISENQTIGAINPKDGALVWRQHPASEPRSKGHLRAADEQDTIVSAAGNRVTAWSSSDGRLVWETNVDGAVVEDLEILEQEDGITKDEAKDAIVLVSGTSHGVKRLDGKTGRVKWTYEDTSSDMPFQVSTSPTTIYYISLHPSIIGAGSKLKVTSLSPITGKKLDQYTLSSDTEITSRDHIVFAGANTAAPILAWTDKTNKVLKVNIIGTKAVTSFNTPGNYAIEKVVLHAPGHVNSQAHFLVEYQTAFGHSAEVYHVDLKKNTVSKAYSLPELQVRGTFATSTSDANVHFVRITEDEVSVVSSTSHGILGRWPTAGSPALAGGYPVHAVSEVVVKSGAATA…
KZM18409.1	>ST47_g10439	MRSTIPITTLALFMSTFSSAAPTEAKLEPVHFPRSNLTTKVLSADTMTCPNSGSSCGVVTFASGLYVSFGPGVCMQLGKNIESIYVAHCYCSLWSSCTGNSKKDVYVGGMMMCEKPKTLDEFGQEVRFISCGGLY
KZM18418.1	>ST47_g10428	MRCRTFHLFGGLALTIAAVQQPLVESQAGIFHGRYLPEFQQDLYLGIKYAPKPERFAPAALSNDTPKTHFNVTRYGLDCIGYGSDTTRLVKEGWTELGEDCLHLNIIVPKTKQKNLPVLLWIYGGGWQQGATSDPRYNMSYVVEQSVLNHKPLIGISINYRLAAFGFVSSAEITTEGAQNLGLRDQRLAMQWVNKHISSFGGNPEKVTIWGESAGAYSVGDHINAYEGDNGGLFWAAILESGGAVGPPLNGTDWYESMYKNLTASVGCANSTNTLQCLRQVPYEKIAPYGYVGLEWFHVIDGTFIPRYSRESLLLGKFAKVPLILGTNTDEGFGVNGVNTDAQAIEQLLTSKRWNLDEEQARRILELYPNDPSLGEPYGWGNRTWPENGLQYKRYQSIA…
KZM18425.1	>ST47_g10435	MRPSILIGLAAGFASQAYAACSSALTIDDFSKWSSNTNSLGQWTSDDASMTSISAANGVLSFKPKSGSYFYETFDCQAAISNNYNSIQFTTKGVSGGSGTLEIQTKSACSASAYTSYYTQFTGLTGNSQTITIPLSQFSGANGNAIVGFVWSGFSSTTATWQLSNVQFGCGGAVGGSSSSARSSAISSTARPTTVSAVSVTRTTLATSTAPTGTCAASLIDDWTSQSRLTFMFYNALNKASSSDGTMTSLTVGKPSKNRVEIVPKDTSSYFYSQFGCFNAKTKGHTGISLRIKAPAGTTFSVELDSSSSCDPTAAQAYTQTSTQLGWTFDGTEKLYTIPFSKFTGLNTEKLTTILFSAFTKTVSFGPMAFYCGATGEYIVSTTTPNTAPPATVAAPAGT…
KZM18428.1	>ST47_g10432	MYTQSFFSVLLAAPLALAAPSSYPHFSGRAPSDNVKCPVVFDGRVSTNISKTPTYFDTSNALFNPDYVKGNNLTWSQILKFPKDVSRFDGADHTAVEVTISDQSIFQKQNGFRRAGLQFTSDSPDGPGGKGIKTLHFSVKQDPTRPLNLTHEYLNVWHEAADYSNNQFQFQAGTLIDNAASKKQNFKILDRAGKQIWTIPIDFKRWQNFAINLDYTKNQTTIYYSVGASKLARVAGPSSINLVGGGQFQLGILKKPTGTSDVANAGYQSPQLNEGQIYGGVFLEDSADGCVSL
KZM18430.1	>ST47_g10408	MKFLSTAFSAMFLFELALAQVSGQATCYFANGTATPKTPDYLQYQACSGSAICCGLNRSNPSNGDPAKGFTKDECLPNGLCQNRVTENGVGKVSYWVDFCTNSDVSGGGCLDVCHETKNAFGNTALTPCDGTATSDRWCCGGKTDCCTSNVGVVQLAQVLGGSLSSIVSASRSSTIPSSAESFRAAATESSTSPASADASSTPSSTGAASGPNSSSSSSSGSGSKLSGGAIAGIVIGALAGVALLAAAIFFARRAAMWKKKASATPETGVVPPYTQHTNGYGSAGAYDTPTSDKYAHANQGEMYGSGLPHELPGGAMDSELPAQDSPKK
KZM18431.1	>ST47_g10397	MAILTSVTTLLLAAPVLAATSSVSSLSGGEKVACAKFKLKYPEQTYFPGSAGYTYETQSVYWSATNNNGPACVFAPQNAQQVSLAVTTVTLTLSKFAVRGGGHMPIPGYNGINNSGILLSPSNLTTLALSSDKSTVSVGPGNRWGDVYSYLAPSNLAAVGGRIGHVGVPGLLLGGGISFYSSQHGFASDNVVKYECVLSSGVIVEATATNAYSDLFWALRGGGNSFCIVTRFDLKTVPSSKVHIGIAQYDQSQSKGYLDGVYNFGKFGASADSKAAIIPTILTFPSINLTAYAAAKFYDSLTDSPTAFENFTAPQLPPVADSYTLQPLAEYIAATDALQPNGLRQAFRTLSSVVNREAVQDVHDMFLSGASKMAGIAGLQASITFQPVTKSFLEESVKN…
KZM18434.1	>ST47_g10392	MFVSRSFSLTAFAALLSLAVSDVFDPDSVCYSYGVDFVDEGSYFINSLSSDPFTSVSTFKGCNTGVADILLVDPDDTEYLCDDIPTTPADEPQLSKCPILKNQMSSGHWLLLILGNNGDYPAQPFAWQRDLYLTLGTQITSTFTPTVTLSTVTTPIATEILSTTSLLVTEVGPFETVTVPSATAKKTKTITPKPVTTTSTKTMTKTRLDATRVFSTTTKTATATCTTPGRPGKPDKPCRFTPTLLHPAALATPTSLPKYSRHVRRSDRAIDYEWARARVEAAKQKRNAKAQGLERRAPDTPTTTLTAETPIATTTTITADPITTTETVLFTQTSTSTLPPATVFSGVLTHTTTLPTRTKTRLQLGWATTTKTITWGATFTKYTTVTPTASVSACKKAGG…
KZM18436.1	>ST47_g10393	MLFRSLAYWLSAGSLAYASAIPTSLVERQDGACTNTARTRNCWSDGYSIATDFDAKSPPDGTTVTYNLEISNVTKPHLDGSAGSRQFQLINGQYPGPTIRAKWGDTIVVNVKNNMQDNGTGIHWHGIRQLNSCQQDGVPGVTECPIAPGKTRQYKFRATQFGTTWYHSHWSAQYGDGVLGTMIIDGPATANYDEDLGVLPLTDYYYTPAFTLNEVAQHSTRGPPAPNNILVNGTHVNASGGGKYAKMTVTKGKKYRIRIINTSVDSTFSVSLDGHPFTVMTADFVPIKSYITTQVTLAIGQRYDVMINANQTVDNYWFRVAVGTDCGSNSMIASGVQMGAIVSYSGASSGNPTSTGVAMRTACVDEKTSDLVPFVPNTVPSSVVGSAGKLEIGFSQAAP…
KZM18448.1	>ST47_g10402	MHFRPAARAAAVLAIAALFEAAPTTVQASSNAGSPSFDVYPPSGTVVNSSLFPPESVVGFPGPTPTGVEPNAIQTAPSYPYNDNKASSFPLIVPQPHGNDAESKFDISRYWGNLSPWYSLRSADYGLPDANPLIPEGCDITQVLLLYRHGARYPTSGAAPATFAQKLVNATKAGGVAFSGELSFLGDWTYKLGAELLTPFGRSQDFLLGVEYRQLYGHLLNNFTAAGTLPVFRTQSQDRMVKTAENFAAGFFGVPEYMSEVNIEIMVETPSVNNSGAPYEVCLNSNVASKGSIGSTVAAKYAANAFNATIARLQSQAKGINFTATDAIAMLQLCSYETPALGYSAFCDLFSEEDFLNYEYYYDLSFYYNNGPGSPVAAAQGKGYLDEYIARFTGKYPSA…
KZM18455.1	>ST47_g10425	MKASVAASILALATSASASPSYKAPNNFFSLNKRAALPIPASKGTVTFTAPKQINGSFDGGLKTYGRGVSCTGQAEGGDSDAVFSLADGATLSNVIIGEDQIEGIHCQGSCTLKNVWWAAVCEDALTLKKDGDATITGGGATGAEDKVIQHNGAGTVTIDGFQVADFGKLYRSCGNCKQSAERHVVVKNVKASNGKLLVGINPNFGDTATIDGTTCASSVKEICEEFQGTTQGNEPKSVSTGATDTCKFSPIASC
KZM18486.1	>ST47_g10359	MFILRSLVALSSFAVAASAAFPLKPENVTVVQSTKFPGVSISYKETSICETTEGIKGYSGFVHLPVDLLRNRSYESHIYYWFFQARHDAENAPLSIWLQGGPGVPSTQAAVSENGPCVVLEDSKTTKLDPWSWNDKVNMIYIDQPVQVGYSYDRLVNGTLDVVASPFAYKPSNFSQTGVPETNLTFLTGTFPSRDFLSTPNTTTAAAPFIYDFMQTWMQEFPGYKSKDNRFSIWGESYAGHYSPIYADYFEQQNDLVAADGSINGSAIELHVDTVGLVNACIDIDTQIDYYPEFAYNNTYGLQFINQTQYDSALAASPQCKNLTAVCRTLADAKDPGGLGNQPDVNKACLGAFLYCFSKLHDDFDASGRNKFDIVAPNLPESFPPKWAAGYLNDAETQQ…
KZM18496.1	>ST47_g10355	MIVWALVVLSGTAVALQPLPPVQWTNTDALSHGFNGFATRNASRSIYITNSFADVADTDGLTLIPPTAFQFAETFREDLSSWDTANWTLQRVDTFPANASGILLGPFRGSDDEVTYENGVTTEEGYEIEIDNRTVYIGGKGARGMFWGTRTLMQQAMIANGSSLQTGRTVDAPAYATRGYMLDAGRKWYTPDFLKELCTYASFFKISEFHYHSSDNAPLNRGHNETWDKVFSHFSLYPQQNTELQGIIQRKNETLSRAQFEDFQTHCAQRGVTVIPEIEAPGHALAITKWKPELALAKKDLLNLTHPDAIPTVKAIWSEFLPWFQTKEVHIGADEYDSELGDDYINFVNQMAEFVNSTSGKRIRIWGTHEPSENVSLSKNIVVQHWQYGQSDPVQLQND…
KZM18514.1	>ST47_g10278	MAFPSWTFHLLIPAVVLLHLLVSPYTKVEESFNLQAVHDILIHGIPRSDVAAFFKASYDHVSFPGSVPRTFAGALVLSGLARPGLALVGDKAQVQVLVRAVLGLCNAFSLVAFGRSVHTAFGPSAGVWYALFQASQFHVIYYASRTLPNMFAFVFSNFALRALLNAYAVSYSREDVNRWCRLCLYLLTIAGVVFRSELAILVGTITLYLLVTQRLSLIKVVIPAGVGGLVIGLLCTTPIDSFFWQSFPLWPEWIAFYYNTIQGHSADWGVSPWHYYFANALPRLLLNPATYLLCIPVALLNAATRRRSLDLLVPLMSFVALYSFLPHKEWRFIVYVVPGLTGVSAAGASWIWTRRSKSIVYALLSLILAASVLVSFAASTAILALSSLNYPGGAALHSL…
KZM18520.1	>ST47_g10331	MISPKIFCIFLVASQATSTAANAILPIVGTHNFDIAVSFASLTDTERLDPFAKDGRSRRVMLSLFTPVANCRHKRLEPYMWPATAAFENDKFAAYGLPNGSFSALTLETCNETKPPGCSSREQYLPLVLFSGSLAISRLIYSGMLQSITAAGYLVVSIGHPYETDFVEFPEGSIVNGVDIESDADVELALTTRVADIAFVHRQMGNSSFVNTVLPGSGLGNGCLTRKTAVLGHSLGGASAAAAMLAIPSIRCGVNLDGSMFGSVVTSGLN
KZM18534.1	>ST47_g10315	MILKPLVYPLASVCLFFACAAESQPFNTILKSFKVIGQQLPLREHVTPSTDDMSSGIIISDVIGKTQNIAIFSSLIRDIDAVSGWLEDAAQNATVLAPDNTAMKNLKRKPWEDPEDYNKFGAEAYEGASGSDRAHSNMERFVKKHIVPESPWEEGKKTKTLAGDEVWWEFKDGQKTIQPDNIQVASIADKVANGEIWVLGGSLSYK
KZM18537.1	>ST47_g10318	MRTFIFLGITALYSIQVFAGDSEWLSPEYKQIFQNPLPFPKNKSPLYTYTNATTGNSIDYYEIDVQPFEQQVYPGLKPAKLVGYDGTSPGPTFRMEKGREAVVRFKNHGSMDLSVHLHGSYSRAPFDGWAEDVTKPGQYKDYYYPNHQSARTLWYHDHAVHHTAENAYFGQAGFYILHDPAEDSLGLPSGPQYDLPLALSSKQYNKDGTLFDPKDETTSLYGDVIHVNGQPWPFHKVEPRKYRLRFLDASISRAFKLTFEADGKTIPFHVIGADTGLLTKPVQTRNLEISMAERWEVVFDFSQYAGKNVTLKNGRDVQHDEDYAATDKVMQFVVGKGVSSQAGNGNLPSSLRNVPFPPRKGGVDRSFKFGRTGGQWTVNGVTFADVNNRILAKPQRGAI…
KZM18560.1	>ST47_g10325	MRFSGTGVLYTALLLVTSVNSLKFDKACNTKYGKLTAKQLIDKSIDFQPKLAKAGVDGLDAVIEVLKYQSETPGAKKPTGSKKELDRIIATYRILFGDIMAKNDDGTPNPNFKSEAADHIAAMKTTRDTLNRMSKPGSPDLIIHCNDDWLSERGPKSMAASKPTAPATSGSQYFYDTDRNRWVSVKGGKPCQGDKAVVTSANKKLSGTSREKGPERITFCPSYLRRQHQLEKDKQSHLWDIPTTKLPDTFTTYTAAGKKDKTLPFHISAFGSKIVAKWFHESMRTELFDSNSNNSSDKKISGSGTSSLAYGFDGAVNLVKQKEGKNVAESSLSIDNILYWCLALYYDKWLWSTGKPEDPSVLSTAPAKVASVDEGFQVEAAAKKGGSKKTKEPADQPKT…
KZM18566.1	>ST47_g10328	MKFSLASLALPVAVNAAAYSAQEYASGAVHAHLMKLKTDQWAHDEELRVGANNTELWPSWKNYEAVKFGKKEKVECKKGLAIVEKGNANQTFRCDNIDLYDFANHADLGGPEGRGSSSWGWTAKNGREFGIIGQFSGAAFIEITKKGKIEYIGRLPAQDPIGSRWREIRVLNDYVVIGSEAVNHNVQIFDLNKLLTLDPKNPKVFDTQKDLTGLFSDTLPIGRTHNIVIDWDNEYAIAVGAQPRNQTCAAGLQYIDLKDPTKPSTPGCASQDGYVHDAQCVTYNGPDRRYRGRNICVGYNEDTVTIYDSTSKDGKPASEVLSKLSYPGASYTHQGWWTERNWHQFILFNDELDEQNKAGPAASGRPVTHIADLSDLKNPKYTGNFFATDKKGIDHNLYI…
KZM18572.1	>ST47_g10347	MKTSRSSLGLALLLINAVFAEFGVDLHNSNTGRQVSGRKIENLVSGVDRSTDSVAELGLSALYDVRRNANVNTLDGIDLVNKIAQLDVGSLLNAGAQGQEASQGQSQQQQGPAQPQGQSQSQGLRPAGPSDINTSNLGGDLANQVAAGNRPIVGTGDINTSNVGGDLANQVAGFGTTPAAQGQAPGIAQPGPQAQAAEAPRPAAEALPASEARPSTGAQAAAEARPGGQGQSQGLGPAGPSDINTSNIAGDLANSLAPGSSVNGQRPAGNDIAGDLANQLAGNGAAPVGQGQTNPQAQGQAAAGQSGSAGAVTIQVKSTTIQEANGQQIPTAVIEPQTQGQQPAAAPAATGAPAIAAPQPPAPPAEAKPTEAPAAMPAPAEPQGKSTAAEAAPKPETQP…
KZM18576.1	>ST47_g10342	MSYAITNAASAARLPSRRAASGLFLFALSAATLLAPAHATRTASLHTPRPSALPTCPLHRDTTPNPAGLRSLHATAPHATSPPLFSYHVAASYSAKQDRFNAQQNLFTNPLHDPTKRHDDWAECKESVDKRKRLRSGQDALFYTQVGDSHTTTFGVADGVGGWVESGLDPADFSHGLCEYMACAARSFPHGFNTTELHPRELLQVAYDEVTEDDSIEGGGSTACLAVAEPDGNVEVANLGDSGFMHLGLNAVRHFTQPQTHAFNTPYQLSKTPHRMLVQMAVFGGPSTLSDMPKESSVTHHKVRHGDVLVFATDGVWDNLSPQDALGIVSKHMVAAGAWVERDGTIEVGHDLAKLLQADSGRRADSNSLQAMVATAIAKEAKDTGLNTRRDGPFAKEVQ…
KZM18580.1	>ST47_g10284	MRGTYTAAGVALLASTANAQLYPGLSKLNHTCQLQKPLLSCPSQNASDVDSCCTETFGGLVLSTQFWDTYTGLEAQGQVLPKDTWSLHGLWPDFCNGSYTQYCDLTRQYDPIPSPNTTNGLKNGTVVPAYTGPNIGTFLEPFGRYDLLEYMNTYWIAQNQDNAGFWGHEFSKHATCFSTFNTPCYGPQYRQHEDVIDFFETAIKYYQRFPTYKWLKAKKIVPSNSTTYSYTDFKDTLAKKHGGIPFIGCSGPRFNATAAGNHTTDNGYTVLSEVWYYEHVYGRPQEGKTVPVDASATYQTNCAKTKGAIHYYQRSNGSEKVPAVPFAG
KZM18595.1	>ST47_g10288	MRPFTLLLAAAFFDLSIAGYALEDDYMTDFYGAFEFFTAADPTNGFVKYVDEATARQTNLINTSTTVPVEWGVDSTNETPEGRPSLRLVSKKKYNSGLVVIDVAHMPSGCGTWPAFWMVGPDWPTGGEIDILEGVNAQTNNAMTLHTAPNCKIGPDTSAFAGEITTPNCDVHAFNQSKNAGCSIEHPSTDSYGVGLNAIGGGVYATQWTAEAISVYYFPRGSVPDDVLGDAPNPDGWGIPAAKFTGGCDIENMFKEQQIVFNTAFCGDWAGAAWESGSCAKKAATCDEYVQNNPEAFKDAYWTINALKVYQDNGNDTPAPSASGAPAQSTIISQPVPVSSGNATVPAISSGSGYTTIPTGVPANPPILSYSEGSYVVPTTSTADIPAETSTLTTEPTAS…
KZM18622.1	>ST47_g10235	MDRYFIAKIPAMAPSVLTLGLLALILSYGPHTAAATGINPLVSRQSNGTALNPHFTAISDYIDSITDDLSSINTEIHSNPELGYEEVKAHELLTSFMEEQEGWNVTRSVGNISTAFMAVFEGSSEGPTVGFNAEYDALPELGHACGHNLIATVSLGAALAAADVMRKESLAGRIILFGTPAEESLGGKVKMLEAGIFDDAKMDISLISHPTSNADSPYMLTTSTDRVDVEYYGREAHAAAGPWEGINAQDGLLVANSALSYMRQQMRPSDRVHGFISSAGSRINVISSKASGSYQIRANDETQLANLTARVENCFQAGALATGAQLNFTVRPYGYANHVSNDLLAASYATHFTSLGGALQPAEIDKLKDPSGSTDQGNLSHEWPSLSPFFQITNQDGSV…
KZM18637.1	>ST47_g10241	MRFVLHLALASLAAGVSIRSPSERLAKLSHNVWESASDHIDVAIPRHEVARFEALGLNSRVLHADLGASIASEAEVRSYWKRQDYNTSGDWFDSYHPYEDHIEYFKQLQESFPENSNWTSSGTSYEGRDIYGIHMWGADGPGKPAVLWHGTVHAREWIVAPTLEYITKQLVDGYKSGDNLTQTFLNSYDFYIFPIVNPDAGFVHTQTTDRLWRKNRQPPPATAANQTCYGRDINRNWEHNWDANTRGASDNECSQTYRGVRPRDAPENAAMDDFLRNIRDEQGIKLYIDWHSYSQLILCPFGHNEYLYAPELGRWTRAASLMSQEIAANSTNQTTYTFGPSGAVLYPTTGVGVDHVYAVGRAEWSYTIELPDTGDFGFVLPPERIRPTVEESWVGQKVL…
KZM18640.1	>ST47_g10202	MKYALGATLVLQSTVALGELLPVHLKAPTTAHFRDIVRNDTYDFGCRPVAHPTDDGHFTLHALLTEDQISHLTKEYASVDEITIHRQMVKRAATAPIGTGDRFKAGTVSPVGLGTQASGATISSIMNVAEVNSAFNALVKNYGVGSVTLPYKTFNGATSVAGFVGAGTDKSAYRLYLSAGVHARERGGPDQLLYWISDLLAANKAGTGLTYGKKTYTNAQVKSVLAAGIVFFPLVNPDGVTYDQSSGSLWRKNRNTKSGSSGSSIGVDLNRNFDFLWNFRKYFDPDEAPASTSPSSETFYGTAAASEPETKNHVSIYDSFPKIRWFMDIHSAAGDILYSWGDDDDQTTTTTMNFLNTAYDGKRGVTGDTVYKEYIPAADFTNIKNVAAKTVAAMKAVGG…
KZM18644.1	>ST47_g10212	MNASYVPLSSFLVICVLLSRSLASAGSVNACSFQSDELARNASSARVTAWVEQPNFRGTFDILWTCLVTIGISTYTMLCLNIPAPKDTYLQLVGRRTLWMILGIMGPEFVLTYAAGQWSRAKWSVKAFKESGYHKWHMRQAFFADMGGFVFHPRDGDPFPLNATQLHWLIRHQYVDFPSVTKREIWDNSKQDTFAKVITAFQVSYLIIQCAARAAQGLTITTLELNALAIVVCSLMTSYAWLHKPADVHSPIHIHSPKTLDEIKGNQDWDLTPLDFVDENGPGYSVNIQPFINMPVIPAERPIQRIPNDRFPTNPYGIQEYLLCLATLLFSGIHVAGWNFDFPTATERTLWRISSLLLFGITAAFWLFETIASWTRLGRWRMVWLYLFNRGGLEKHRAG…
KZM18653.1	>ST47_g10207	MSPSKLGLFASLALAANAVLIPPSMTAAEPGDGNALETLAINPFKQTLAVECPGCAVATLDGETLEWKKDEGNAFVSGTLPGGPLAAGYRVRDVRISGPHHQQEILHVHGQAVLILHQLLDFEIGPLEDALEIDGVQLYPPTFAIASQPFYITQINTKSENALRLRVTGYTFHFTTAETVSEAGLELLPMTFQITSIESVPMDPPSITVNLLKDPTGRLMIASFDAMKTIEATPVEQEKECKQWPLLCKMRGAMADRIEKLKHMGKGRPGCHKRPHGMHRPNGHHNPMAEETLEGKPPHRFRPGGHHRRPHHMEHNGHDHHHGHHHGHHHGHHHGIQMFLRRAFFTILVPVLIGIFAGTLTYLIGMALGCLIAVSIAKFRGQSYQPIALEDDFEEANGE…
KZM18667.1	>ST47_g10033	MLTLRTLLSLPTFFSIALVAHAIAVPDDNGVIAEGKGKEKPELAATLTGGEGCSSSDIEDIRDGFVEMTELLQAALPYDPNGQPAIELFGQPLQIVNYSSMIQSNLERAAQYANLKGNEIVNPDVHVRCDDPNKTCKMGNKRDGNHVAYNVGNLPMINFCKDYFMLDGLEERVDRKSGNQMEKERLHEYYNRATLWARMVMHIEGVGSAVVEKPIPAGPNSTSGREWDTIVTEGPMNTTVLAGVLNDRPDGNGPDDIQTLKYAYGVTRSKLLAVLSTQLPYDAANNAENYALYAQARYVIVKKGFYPNVPVMDFPNELSVLTNEQLQDGERNKFAYFDSSDVVARPPNMELKASPLPGAASMMHGQQPTLMALAILTVGCSLAMSSFG
KZM18674.1	>ST47_g10034	MKLATILSFAGAVAALPAARNDVSARASYSKVDGLKFNIDGVTKYYAGTNSYWIPFLTNDNDVNVIMGHLATSKQNILRVNDVTSIPSSGTVYFQSFSGSTATINTGANGLQRLDAVVKAAEKNGIKLIINFVNNWTDYGGMAAYFSACGVSSNAQWYQSTKCQAMYQAYVEAVVSRYRTSTAVFASSNYVRSLDSDHMIAIGDEGFGLTGDGSYPYQFGEGLDFAANLALPNVSFGTFHLYPESWGTTNDWGSAWITAHGAACEKANKPCLLEEYGVEVAADHCPVESEWQATSLGLKDAGMAADLFWQLGDTIPSTGALTSNDGNTIYYNSSDWTCLVTDHIKKIG
KZM18704.1	>ST47_g10112	MVQIPSLVALCSSLVGLSSAAALGSAEEYADGSVHAKIMGMKMAEWDAELASGAMDSSRYPELGYSACENGFAAAIPGDANNTFKCNNIDLYHFLPHAQLGSVGQGSSSWGWTSEDGREFVAIGQFDGTAFAEISSEGKLLYLGRLPQYDPVGSRWREIRILRDYAVIGSEAINSGVQIFDMKKVLTLDPANPHNFTQEDLTGYWNELPVGRTHNIVVNQELNYAMAVGSVGGNETIRVRGDLPCRGGLIFLNMTDPANPFSPGCAAGDGYVHDAECLVYRGPDKRYYGRDICYGYNEDTLSIYDVTDKNGNVTNLISVTSYPGAEYVHQGVVNDEQNQEYLFLDDEFDERDAKVGPMTQGLPTTHIFDIRDLENPHYTGNFEGKRRAIDHNQYVVDGF…
KZM18708.1	>ST47_g10152	MRVSTMMPLLAAIPSALAAPQQPEFTNTTVLPTHFAMLLFPHFQALDVFGPLDVLNTLSMLYSNSTTMTLTLLSRTMDPVGTTIKGMHGKGNFGEEILPTNTFASVLAKKMNFQASPGKAHDQMAAKSHGGGNGDGWGNGYARRHEGHSPTTPQGPPMNHTMPIDNDIEVLLVPGGGGTRQNMTEEIAFVKEIYPKLKYIISVCTGATILSRAGVLDGKKATTNKRAWPWATSTGPKVEWVPSARWVEDGNVFSSSGISAGIDVTFAWVGRVYGEEVADYLANSIEYERWTDPHKDPFAKVWDVPGAV
KZM18714.1	>ST47_g10091	MLSQSVLALALAPVALAHFNLNYPSSRGFDEDKEPTFPCGGYDTVQSQRTNFPISGGPIQLKLGHQQTNIGVYLAVGDNPGDGFSVVLYPQFQVSGFGDFCLGDVSIPSSLNVTDGTKASIQVITNAHGEGGLYQCTDVNLVNTPLSQSDYTTNCKNGTGISVSQENISGNPNSTSTSASGSAAASPTASSTSGASQAKAASWVLGAVGVVGLAML
KZM18729.1	>ST47_g10046	MNALLTTFLATMTSLLFVSTHASNVRTIHQFPNPTWLENIAAMHNGSVLVSILGKPEVHMVNPSITPSSDTLVASIPAVNAILGITELSDNVFAVAVGNVTPANVPVLGSFGVWSIDLKHKHEAAKVQKLADTPNLNMINGLAALDHRTLLLADSLAGNIASLDVRTGETAIWLGDESTASNASAPGLPFGVNGIKVHSGHVYYTNTVRNSLNRIRTSSNGTAIGDVEILAQGEAISVPDDFAVLNDGTVIQARPMGNELVKVGTDGNIQVLAKVAGVTAVAIGSAHRDTTTAYLSSMGGFSADGSVESGGMVLALKLE
KZM18730.1	>ST47_g10200	MYLSPALFSLISLASASNLPSPQRLFTNPPPHHDAGFTIPTVHESAVQARRILRLESIGTLSTVFPSSSHHATENRPAVDGAPIGLMDYFGDCEPDTGNPTILAITIATSFKNVDAGSNITLSMRWHPQDNVWRSPASLPRFSLVGHLEDISADEVSKQNLTTCFVKYHPDAAWWLPGNRIHESKWVRLVVDEVYWIGGFGDRAYIGWIPTKEWYSVTPEEIEAVRLPGEKKSGWDSWKSWVGLGGEETFEL
KZM18740.1	>ST47_g10125	MEHVNECSGYALGAVGAVTLCLLYLLLRTDAEAPVPYRVAPPAQAQPGWRGVVLQEPTLKVSGSALIQCYAPATGEALGHVHPSTAAGIDRAIARAKAAQVPWARTTFAERRRVLRTMLRFLLENQATIARVACLDSGKTMVDAALGEILVTAEKLRWTIRHGEESLQNERRPTNLLMAYKWNEVVYQPLGVVAACVSWNYVFHNLLSPIIASIFAGNAIVVKGSEATAWSSSYFASIATRALEVCGHSPDIVQSLVCWPHVADHLTSHPDIAHITFIGSRPVAHLVCASAARALTPVCVELGGKDPAIVLDDLSDGDFRRVASILMRGTFQSAGQNCIGIERVVALPNVHDRLIDHLTPKIRALKPGSILTASPDTPVDVGASISSAGFDNLEALIQD…
KZM18759.1	>ST47_g10148	MRTSLLWLAAIGAEACQRERVFKRHAHAHIKRQAVNATFPPVLDPNEQVLINSFDNTSISTWSYYYTHGDHIAGRNESMAQWTADKWESYGFTSRLDEYYVFLNYPVSHSLVLTYPNGSTYTPTLQEAVLEEDPTTSYPNSISTFHGYSFTGNASAEYVYVGRGQQVDFERLQALGVELEGKIALAKYGGPFRGLKVKNAQDHGMIGAVIFSDPGDDGNMTEAKGQLAYPNGPARNPTTVQRGSVQFLSTYPGDPTTPGYVSKKDSPRSDRSIITPQIPSLPISWLEAQPLLQALNGFGSSGVQVNRTGWVGAIPGVNYSTGAGSGATLDMSNVMNDTYGSIWNAIGIINGTLEDEVVIVGNHRDAWIIGGAADPNSGSAVLIELAKAFGELAKTGWKP…
KZM18781.1	>ST47_g10078	MKLTILTADGFAALTLLATCFSGLSLAAPTVEGLALEKRALPVLLGSAKSFGALSGTALTSNGATAITGAGGVGNAGVWPGTAITGFPPGTVSGVLARGTVLAQNGKSGCLTAYNNALSIPATRALPSSNLGGITLTPGVYTFPTSAVTLTGTLTLNAGGDARKQFIFKATTTFTAAALSRIVLTNNAQACNVYFVVGSSATIGAGAQLQGNIIAYTAIGAGNAASNKGTWCALNAAVTLINNSLVAQAGNCPT
KZM18783.1	>ST47_g10155	MRFSRVVPFIPLASALVITEAEVFEKLPKSNRQIENAKLSGKELLDNAQEVLDDTFNKVKESAQGIYSRIHDAGANVESWLEGSSFDDATINFGGGEDHPPHHPPHHGPPHHGGPHHSPHDGEDKPNRTVYELINESKYTTKLAKLINKYDDLVETLNSTKANYTIFAPTDEAFEKIRDHGKHPSKEVLKDILLYHVSPDFYPAGRVLHSYTIPTLFEPEKLGHKQRLTVRVTLKGPTINFYSKLVAVNIFGTNGVVHGVDSILVPPPKVASIIELLPGEFSTLELALQKTGMFEKINNTDYPHEGGTLFAPSNFAFQKLGPKINAFLFSTYGQKYLKALLKYHIVVNQTLYTDAFYDASKKHSDDDDEKSADRPPYYHYDLPTVLDGKYLAVDVARYG…
KZM18802.1	>ST47_g10082	MRFITHLFALASLASAQIIGTNGIGTTPSQRSVVSADQAYKIIQAAVANATAIGIPQNVAVVDPSGLLVAFFRMDNAYIGSIDISQKKARTAVLFNGLTSAALYDPSQPGAALYAIEQTNGGLVVFGGGLPIYYQGKLIGGVGVSGGTVPQDVEVATAGLAGIGASAAAPM
KZM18804.1	>ST47_g10080	MRSTLATTALLSLASSTWALLKASENNSSLTISNERLVAGVSKTRGYINLLTLDGQNLLGKEDGNTGVGPYLDCYCTPSGFWTPGRGTKVDYKLFNGTDASGVKYGGISMGETYAPTGQRLEQYWFLREGETGLHTFSRVAYYNETTPFLRNLQELRTMFRPNHDPPLFTHFVTNEEFDAPRPNTEGQVVVQDATWYLPNKDDSYVQGVGDYFTKYTFQDTWRKHKAHGMWADGSGSANGTTYGAWLVHNTVETYFGGPLHSDLVVDGIVYNYISSNHHGDQTPNITNGFDRTFGPQYYHFNKGGSLDELRADAEQYGLKPSWNAKFYDSIAKHVPNLVTAAGRGTFKAKIDLPKGARNVLAVLAQTGVDFQDNVFDTKAYQYWAEVPSNGEASIDRVK…
KZM18807.1	>ST47_g10087	MKLAAALGAIGASSLLLSGVGAIQLDVNSPDNIKSAAKALSANMRSYYTGDRVGDTPGNLPDPYYWWECGAMFNALIDYWYYTGDDQYNAITTQALQHQIGDYSAFMPANQTKTLGNDDQAFWGMAAMSAAENKLPDLGSGQPSWLALAQAVFNTQKDRWDNQTCGGGLRWQIFTFNNGYNYKNTISNGCFFNIAARLYKYLGNDTYANWAEQAWDWELSVGLMSQDYHFYDGTDDTQNCSTINHIQWTYNAGVHMAGAAAMWNVTQSDLWRTRLKGLIDGAGVFFKDSVMTEVACENNGKCDVDQRSFKAYLARWMGYTALIAPWTRQYIDPLLQASAKAAAAQCIGGANQTSCGLRWIDNGVNDGSFGVGEQMAALEVVQALLYPTVGGPATQNNGG…
KZM18826.1	>ST47_g10043	MARYTRKQIVTFISIVYLVFATAMAGYASSRANRLSVPISDTLTGFTTALPVISGLLLECGYDLTRRKERRAHMERGEIQRPPFVIVANFFIFIYSTVVITLLGTHAAPPSELDCGLRRQWQTLFRHKDSSAIRTIQDQYNCCGFANSKDMAWPFPDKSHKPDSCQESFGRTNGCMGSWKAEEQHIAGLLMGVVGLVAVWAFAIIAIPTQRETWLHKIAPERVSEFIAAEEHGSTGERRRINYLPDTNRYSDRFQEDDDETTPLSPENRRALETGNAQVGTGLPGNVAMDAPATEEWARA
KZM18839.1	>ST47_g10026	MKSYIALALASTALALPQTSGSSGCASSAPGTFQIQTVNKPSSKRGLVERQLAGALTLTLENGILKDQAGRQGYIASNDQFQFDGPVQAGALQTEGFALCGNNSLALTTGQRPFGATTFWQCLSGDFYNLYADSQGMQCVPIYIQAVNKGSGSASQISDGQPQATTPAASATNAVSQISDGQPQATTPAASAVVSQISDGQPQAGTPAPSATAVVSQISDGQPQAGTPAPSATNVVSQISDGQPQAGTPAPSVSNVVSQISDGQPQAGTPAPSVSNVVSQISDGQPQAGTPAPSVSNVVSQISDGQPQAPVATGNTTISRPNATTSQPAAFTGAAASATFAAGAVAAGLFGLFAML
KZM18855.1	>ST47_g10134	MLFATFLLTGLASAVLAITPRQVTTEFAPWNITNVSGGSPSGRPGSSPNETLSISIREPNVIRLQRVPRGYAAFLPWETTCSWAWDRAGTANFPIGIETLCSPVDDTLGNFTMTLSQGESSSDFTVKIKETKEVTVFGTRYVRVFEAEKALKDELFKTCGGSGVCGIQLADGPVEVQQELTTSIGTCEEASIGGC
KZM18861.1	>ST47_g10182	MLTQGIVLVVYTAVAAASWNGTINYGSPSSRHTALGINMHKVKRRMLVKRDGSYHHTMDVRFTHGVASGDPFAESVMLWMRASPVLQNDAFNVTVKGAEPCFSHDTERYIKASKSPICVDWKVFTGLNTSDQVISTARPTPRLISTTPSRRGSLDKSDPWTDLMQIEADGLIGRTKTAPAPDDDVSSLRLGVFSCANYPLGYFNAYGNVARKDSIDYALHPGDYIYEDEVGVPGEDERAMVPAKEIVTLYDYRTRIAHTMDNMEESFNEFGGISFDERKMNAVRAFQMGKLLDLVMLDTRSYDRSITRVGWNDKYVYDISNDAGRSIMGSHQENWFFRQLSSSQDRGAVCRIIGNQMIFSHINRTGEEGDRDIPVDVDAWDGFVASHNRTLKHLHDNII…
KZM18884.1	>ST47_g9970	MYSIIILGTWCAAVFAAPVTQSSDTNSTWQLAEGTKTMCDSTSDKIIGFYVGPQMESVLTEACVAMMPPCAHQDRVANDTMCAQVTDWRLDGPKNSTQSANVETAEGNKISGWDVKLSVTPATQPETSAGVFWTSQDCYGYFAYMLEKWEPEGCHTQQGFGVGNITVGGQSSLAGTVFKVEIVAEQ
KZM18885.1	>ST47_g9973	MRVQATITALTSVASGFLMPRQSKETTKTPNVVAAQYDGTCFYPVPDSKFNLEAYLGTWYQVAGTPFGPTAQDSCVAGNYKLNDNGTIRVLNTAKRGAQTVSIVGTATPVDTAYGAGGAFIVRFPGSRDAKCPGPNYIVQDYAADWAIVQTQGWGTLYILSRERQPPPATIDALIDRAVAYGSNASAIFKFNQTGCDV
KZM18900.1	>ST47_g9950	MNTLLTLALAAAAVAAPTSRSYPTGKVGHTSKNDSYLVSLGPRPYYIINNMTDGPLKEKLQSCENKPVSINQFSIGHRGGGTLQFPEETRQSEDAGARMGAGILECDVSFTGDRGLVCRHSLCDLHTTTDILTRPDLAKKCTVPFTPANATSPANALCCTSDITTAEYSSLCGKQDGFNASALTPQDYQHGTPTWRTELYDTCGKVLTLNEYIDLVNDYPGYRNFTPELKTPPAEVPMPFKGYTQQQYAQDMVDAFRNKSIDYSRIWPQSFTYDDIVFWLKYDHDFGKQAIYLVEYDTPTDIAAGIANLTIAKAAGVNIIGPALPMLVTVGGPQNNSIVPSAYAHAVKAAGLDMIAWTFERSGPLATVKSRGEYYFESIANVTHYDGQYYELLDVLVHD…
KZM18905.1	>ST47_g9975	MRFSSIVATLALTASASAWKIPQGTEDGVYKVDTLEDGSTVHTKIVDAADIDRSQPEVQGISLVPDETSSLQKRGNDQVWCGCGYNMVSGDCDAAVADLKTQLRPSTINPGQAYYSIRGKVVAFACNRGNRNWTVFPQNLGDSLADITNKCGWYIAGAKQTGNDDQALLLGYQRWNGNDDFCGGARSSSQNHC
KZM18906.1	>ST47_g9974	MRFLASLTTLLLAPAAVLAGWGYSDDGKNYVIDTNANLVVKVSKTNGDMTSIKYRGVEYNGQGGKNSHVESGLGTSTVTIKQFSDPNVIKVNIKYGTLKHDLVFRYGNPNVYIFMNKVDSSVTVSRYIVRVPPNIFTNNLSSDTDWIPEGVKVIEAGDVNSVTSNSHTYSKHYSGYKYGRTMDYDFVGYTNNNVGMYMIRSNHEKASGGPFFRSLVRRGGSGGPDLYDIYHYNMGHTDVMRFGLQGPSVLHFTDNGAAPNANIFARKANWDWFDNLGIDGWVPASKRGAVSGVGLANMKNGQQYVVGLKSNTAQYWTTTGANGAWKIEKVLPGTYTLNVYKSELEVHTTTVTVTAGSTSIKNTITCSDPQDTVVVWRIGEWDGSPKGFLNFGDTPMKPT…
KZM18916.1	>ST47_g9924	MRLTGVGAIVLLAGAASAAVGDWQQCGGVNWGGVTSCAAGSACVEINDYYSQCQPGAAVTTLITSAKPSSPATKTSVTVVPSAPAATGTPAGSGPGTTLQTGYYWIRAVASPNFHKYMQTKPLYATSAALLGDYTTAGQFQVVDGQLVQLVSAPGAPVKLLYAVVSETRYINDNSLSVTFSTTKNTYGQFAWNGDGLTWTVAGVTRPNAAAWYVCTGQQLYINLGNYLYQTPAGCADQTIHYYNDKTANA
KZM18917.1	>ST47_g9925	MSSTLYTLVSLLPVFQFAIAQTAGSFNTLTFNVAGLPDVLNGNDVPGDKTTNTARIGQLLTQYDIDLIHVQEDFNYHATLYANDKHPYRTATSGGVPIGSGLNSLSNFPYTDFERVKWNQCSTFDSADCLTPKGFTFMRVKFAEGVWVDAYNLHADAGTTAADLSARASNLRQISDHIKTNSVGNPVVVFGDSNTRYTRTGDIPAVFSTENNMKDVWLELVRKGSPPTAGSDALLCDNPSPNTTCETVDKVWYRGSPAVTLQATTFDYAGDMFLQEDGNILSDHNPVLVDFTWSLKGQLQIGDAYGGEYGTWFNDLDSLAKASNAKVATITVRGQNRLDGIALSLASGQTLTHGGTGGTASTLTLNSGETLTGATLCQGEKDGEMRIFYAQLRTSAGRT…
KZM18925.1	>ST47_g9949	MGVLHLIFGFLSLVCLTSAASICGTVGYHNETTLSFYMGNFFYSAPSTFTLCAAFCKTDTRCESFRYSSDSTNQFCEFFDASLSAYFTPDSTSPYYYYDIDCPFPPFGSASVISAVTTTSTPPASTSTGTTTTRAANPGTNCAATTATTSVLRFVTHLDSDSHNACAELHHSDSSQHPAYHHNNHLDEYLDDDSDNIRAKVRRGDSCAGSDDHANRTDNQHRDGDENRDGHQDRDCDQDRAHDDDGASLKCISTEFQSRVPPSLLRPPIHRPS
KZM18928.1	>ST47_g9938	MHFLSALASLLALATSHAVAASSSHRAPLRTILYAENADILTPNHRASAVSTFDLAFDVGAQRVRLSLEPNHDLFVDGGRITHLAADGSVERHEPMDRLQHKVFKGTAWAKRGSRWDRVGWARVGLRRDGLRPLFEGTFTLNHDHHHVKLATSYRATRLPEDPDVELPLDGEERLVVFRDSDMGMAPHGDHAELRKRAGVHGQACASDQLGFNMQADLPAYAGMRARDRTSRASMPMDALFGKREIDKQPGAGGAGVNLISTLGSTAGCPTSRKIALVGVAADCTYLQSFGRDRNQTQQNILESINAASELFESTFQISLGLANVLITDPDCPASPQQSTPWNQACSDGVDVQARLSLFSTWRGQQTDNYSHWTLLTTCNTGSAVGLAWLGQACVQGSE…
KZM18937.1	>ST47_g9917	MPVQHTLFGRPVPLPMPPRRFLALFVVVVLLVVALTLHGPPSTADLPTYESVAEAVKHPHLPDVGPLPAVPHPFGPSVHKPPKPAAQPNSSLATAYGSLDWLADFKWRNPFSSAVTLDENTALLPPLRPRPPIYTYYNARPKQPPAVVAAENRLVLAWRRAWWAQGFRPVVLSRAEAMRHPQYPRFHRMQLDTRVADEVMRWLAWANMGGGLLANSLALPMAAYDNPMLAFLRRQHYPHLSRLDGLGSAVFYGHQAAVDGAIQKLVDSPLLKNTTANTDQIAATATKDGGAVVNLLAPTDIAKDAKANAIAYYSTDVIRNAYRTIADKLTNTTQADGLTLLAHLLNAHLHLTFQELHPDGLAIAQPLPEHTTALIEPSIDLARNLTQCPASPMPNSCPP…
KZM18944.1	>ST47_g9910	MLTNVFAVTAAMAATASAFDCSGHYFSFFNRAGPMSYQRVDPALFPGAASPHIHSFDGGNAVSASSTFDTQMGSTCTTARIKPDKSLYWRPTLFWNGNNTGFYRVPEKAAKVYYKSGDGSAWANVTEFPEDFNMIAGDPAKRADGDNPGGVRWACHQANGGDNSIFTNGFPSGFQSCEYGFASEVTFPSCWNGQKLDPSKPSAHMAYPSNAGVGIENCPTTHRAARFPTIFMEFWYDVSSFNGQYSSSSTPWVLSNGDPTGYSMHADFLNGWEKGVLAKATGETGGCNCGCACGNDEMKQCFGAENVNDDGDSSFAECSASKSDAIAKLDKLPGCNPIQSGPARATVVSGAGCDATQVASSVASATSAVISEVASAIPSAYSEAFSVTVPAGASVTASA…
KZM18945.1	>ST47_g9919	MTPTSPRNFFLVLELFVVLARCASLDYSGEALTTRYWDCCKPSCAWTNKGPVFHPVGSCTADDKPIDIDAGTGCKGGTAYACSEQQPWAVNDTFSYGFAGVYLTKELRGAATEEAWCCACYRLDFTSEPLRGKSMIVQGSNTAYDVNTANRFTLAVPGGNTTSVDGCTMQYGVSQSVFGQDGLGVATIEDCQNLPEPLRPACKWRFDWLQDALFPSANFKRVVCPSELTAKTGCVRSDEKELAEQISGNATTTAKTSSAQTRRTRFGTTVSAAALAGWLLAFSAV
KZM18948.1	>ST47_g9906	MRVSAALSIAVTLGSAAAQGGSILGFNSGASDDKGNAKNQQDFEREFKAAKSLNGAPGEFNTIRLYSNIQWNTPSTPIAAFPAAIATNTSLLLGIWASGADNIDNELKALTAALDEHGSKLADLVVGISVGSEDLYRVSEPGLRNNAGVGNNADTIVRFIKDARTRLASTPLKGKPFTHVDTWTAWVNGSNKAVIDEIDFLAVNAFPFYEAERDNQISNAGSLLNSALTATEGVAGGKDVWITETGWAYTGPAFGAADATVDNAGEYWQDVGCKLFGKRNVFWYTLRDANPDNEVKFAITDNLSTTPRFNLTCPTEKVELPAPAPITNNSTTSTGNGTGSSNVTNSDSTASSSASGSANGSASPSSTGVAQSTGVGSLVSVSVVNSMAMALSVVFALAA…
KZM18951.1	>ST47_g9909	MRFTIATIAAMAAAAGATVIPRSDLGAWNVTVTRYGGADRAHGEIVTGVYANDQLADNIPVTCRFDNLINGEIVQKTTCNPDSFSYKLDGDDLTLTQTLTLGETNVTVSGSADALNFITDGINGKTFIAHDVLVTATTGVA
KZM18977.1	>ST47_g9878	MRSTSTVLFLATLLAPFVAADLHSAAICIDTKGGASVYNAAATKKACESYKARNTGNKQWDSCPDCQMKVIGNLNLCHSGGWHIGGSEMKDYCNRLGGAGGSLAN
KZM18980.1	>ST47_g9877	MHFSQILALASSAALVAAAPAPIPVGVDDVILYGKGGRYTMMKRSDFDEVDMLRKSGVAPPKPGYLDDTLITLTGDEIVKSNATVQKRGTLLIVPNPHSRFLGWDVQTSAVVKGAPTTITISTGYSVTNSISVGSSASFSFLKGFLSATVNIDYSKSWQTTQTQQFNAEVPAGKYGAFVTNAWTNRESGNIWEGTIGGAGRLTYYQADSFENKRYGDLGWVDGVITLCTGVTFPLRRCIGQGTL
KZM18987.1	>ST47_g9844	MKVFALLGLLPTAALAHDLLSVAFFAKEKTHLLEFVSDNNHIDYGCRPVVMPTNGEHKLHAMLTEEQVHHYKRRLDAGAIRVETLDHLNKRQTATAPIGRGDRFKGGKVAPRGLGSQKPDVYGSYQSAGILNADEIYTALKGLEKEYGLELFTAPYKTFEGNTVMGGVANKAEKIKKDKQYIYFTSGIHARERGGPDNLIYFISDLLYANKHRKGLTYGNKTYTNSDVKKALGAGIVFIPLTNPDGVRHDQANSNLWRKNRNPVSALPGVNASVGVDLNRNFDFLWNFTKTFDPSVSPASKDPSSQAFYGTAPFSEPETRNMKWVYDIFPEIRWFIDVHSAAGTLLYSWGDDINQSEDPKQSQFNPAYDGKRGVVNDTLYREYIEEEDWYNIERQANRT…
KZM18990.1	>ST47_g9841	MRLHLTTALLGSLSLGALAQTQIAQTCTDDICYKLNIPTVTAQSGDGNIFLSLSGPTTYSWIALGIGSSMTNSDMFIMYTDGNGNVTLSPRHSERQEQPQYDGDLDVELLSGSGVENGTMTANFRCGNCARSGSVNFGAQSGQWIHARRAGNPMDTTDVQAQIVPHDDYGAFTWAFSNAVGGVSTNPFAASDTVVSVSTPGSSSRATRRNIILTHGILASLAFLVFFPVGAIIMRLGRFDNVLKVHIAIQIFSWLIYITAFALGLYYGVTGDYMTEAHPIIGIVLVALMVFQPLGGWLHHRQFLRTGQRSVVSHGHIWTGRIAIVLGMINGGLGLELGGVETRYVVAYSVVAGVMGVAYLASIVYGEMERGRRPSIAGSGQEKINGSPEHSSGGADWCD…
KZM19014.1	>ST47_g9833	MKFTTVLAFALPALTYAFPAMMGASSRADLEDALREQLKREAAAEPEPQITNVIGNLVGSLGDTVGGLLNSVGNALVVASNKRPEPGYTFKAPGPGDSRGPCPGLNLLANYGYLPRNGFVNFGQVLDATSRGFNMGTDLATVLATFAVLANGDIDTQSFYLGSGKNGVGGLNRHSTVEADVSPTREDYYNGCGDNHHLSSRLVKQLVKYVDQDPKKEFSMDAMGKQYAETAGFSKNNNPFLYYFPFPQIVSVGAFAFYPNFFSNGTYGAGGVANAKSILSIIGASFDKSTGEFTYVPERWPENWYRRATPYGAVNTLTDGFLKIYPRNIIVPGVAQFGTANLNAQTILCDFYQGINSITPLVIGGTEERVAKGISWALSVLVPAFGGTAAGCPDNVISP…
KZM19016.1	>ST47_g9857	MRFTLSATVSALALLASSVHALPAQQTQAYAPAGNLDKLAKLMPKSALPGPDGLRLKYVLLGVGTQNYTCATGDENAAPGTTGATANLYDIGTRLNNDPFAKWTIPSISPLALSLSSQPTRFTQNLQSLGFEHLVGHHFFSGAAPVFALDQLSLSPYPLTVLGKLNETDAPTSSCPGTNAEGAIKWLLLKDTKGLSQGGINTVYRIETAGGNKPATCKGRKAAFEVKYSAQYWIFGPKSSGYSVPN
KZM19030.1	>ST47_g9875	MLLKSLLAVSAVASSALAGFDIKTGQTEWWYTNDAESTSILNAISSAYASYKAAIETQADVKSAQGAFYTYARTRDGIPDIVTATGTAYTRYTTLPDWYEAMPTDALKVFESVRKEEDKIWSSVVPKAARTSGSQGAAPQVTGKSIYVNGAIAAVVGAVAAAL
KZM19044.1	>ST47_g9795	MKYTLPVLGLTALASALPQTTSPPPSFKITNVISGGTGCPRGSIDVNWTDHKILPIYFGQEFTAAVGPKANITDSRKFCQLNLQLEYTPGYSFAVYSAEYTGFAALDAGVTGTVKSTYYFSGLAEQYLLAAAPPRRYRSTHTPIRTAADRAQTSSAQTLSGPTRALFNKQDDVAVAVWSPCSGDALFNVDASVALTPFAGPASGVLGIARESGRLSSSLYVQWKKC
KZM19059.1	>ST47_g9805	MRLQLASWLLTSFTTHAYALQCAAPPLNLPIRSLSTAPGTLSRGIPVSIGTPPQQIVLTPSLQLDTSFIPRYSNSCIYTRDSAIPANDTRWSKEDGRTVCASIYGGGFVPSLSTSFHDNGTDEQVVEEWFKVSRVSGWRFVTESFIFVDYMETYMQQNKILPEKRNVTSSFILPEEGATFGGLGGSTLTLTPNSRTLNTLYSEGLVPSRSWSLTNKGLCLGCIDESLSTGEFQSFKLAARDADGELPCLFQVEVEGLEYYPDVGTGGVALIDKPFTACVDPGVAFLVLPTAANARLSQAAVANLEAASNKSMPFGGSLKDGSGHLLLKLEGGLEVNITVPAARMTDGEGPGERTLAVTTGSWGAYGDAVPVLGRPFTDSVVLRWDEIGQEYGMANRNPQ…
KZM19061.1	>ST47_g9807	MTRSILPWLRAAAVAALAQQVLSQTCYYPNGNAAPSTEKACSSAAGSACCPENWQCLDNGLCYYPPSGLHGRYSCTDKDWNSPGCASNLCTYNMTVGGGESITQCSNHDDQWCCNADATNVNCCKEEPEPRPFFNLQDGTAYATIGSNQASSNPTISTVTGLAISGASGSSPSKTSEASSPSQTSEDSSPSQTSGASSSAASSKAPSPAASTARPTAASVSPVTSVATSVRSASGGFGPETIYITNVITPAATSDPSSGGATSSGSSGTNTGLIVGCAVGIPLALVLVGILIWILRKRRLANAHPYKATPDGGESPNIAPAALAGATKQEVYGHSRPGTSEIDSNPVGPGRPSSTIPGKAELDSGAGFHPGTGVPFAPNTAFIGGGNGDRSTWGSSPPG…
KZM19070.1	>ST47_g9792	MHIRGSSLYFTVVGLTSTTAVLAAVQPYGQCGGQSYTGETACADGWGCKTWNEYYSQCIEGASDPAPISAAPSAAPSAAPSAAPSAAPIPSGNATAPIQTSAAPIASSTAAILTSAAPVPSANVSTPVAVPTTLETLISSSSLVAIPEDVSSSSSVVVVSTSVAAPSATPSAVAGNSTGTFANGEDCSIDAVFKAKGKKYIGVATDKGRLSTGDNEAIIKADFGQVTPENSMKWDATENVEGTYTLTGADYLVDWATTNDKLIRGHTTVWHSQLPTWVSSITDKTKLEDVMKAHITKLIGGYKGKVYAWDVVNEIFGEDGAFRSSVFYNVLGEGFVKTAFETARAADPAAKLYINDYNLDSASYAKTKAMVSKVTEWVAAGVPIDGIGSQSHLANNWPI…
KZM19090.1	>ST47_g9770	MKLHLAPLAALALTAFSQSTTPAAQTPVVTPPWATTDLPRWSSLYDSLVSAGKVPSTLTNAPWPTGGYGPGSGPWGPGGHDHDGGHGPGRWGGPSGAGPWGSSPPWSAWPSASASAWRNAPWTSWWNGTACPDPNWPGWTAGPWSTAAPWTSWAGCTASTTATSVGTVTVSGTAVQTTAYGLQVAAASVSASASSTEASTGGAEGLKTVGLGAVVVGAVLAVVGVM
KZM19093.1	>ST47_g9775	MYYSASTIALVAFAANVHAHGVVLAAVGDSGQSQGFLGMNRVVVRGTILTPTVDQNLARNCTTISPCQQDSTIIRDSEIKQNIVNACGRTEISGNIDIGEQTENELAANRMTQVSSGSVMAVTIHQVNADGAGPYECDLDETSNAQTTLTPLKVANNVPGANGLSQAKEQDFTINVAMPDKFNCIGASTGNICTVRCRNTAVAGPFGGCFAVQQTDGEGRDPTAAGVQTAQTFEGISDQILQNQQDLPVAIAANQAAGAAGGNEGASAISALISATAAPTVAEQTAAAGNGNQNQDQNQNGGGNNQNAGGNGGNRNGQNAGGDAGGNVGGNAGGNAGGNAGGNQNAAGGNGNANGNANGNANGNGRGGQAQAGQGQQGQQAQQGQQAQAGQGAQGQGGR…
KZM19095.1	>ST47_g9766	MFGLGSGKPYFGLTGTWLTVWVTVACATDMTLFGYDQGVFGGVIVTPDFLDQLDLNGKTSLISTVTAIYDIGCFFGAISVCAIGDPLGRKKCVLLGTTIMSIGAIIQIASFNVPEMIVGRIIAGIGNGINTSTAPVWQGETSKASWRGKLIIIEMIMNIAGFSLSNWVTYGFSFVAGSPAWRVPLAFQFLFIIILFATVPWLPESPRWLMAKGRVDEAERILADLEATDVDDPFIITQSKDIQWAVQYEKDHAVRWRDLLRGRTGDQAGTHTIRRVLLGMGTQAMQQLSGINVTSYYLPTVLIESVGLTNNLARLLAACNSVSYLLFSLIGIPNVERWGRRKMMMYAAAGQFFCYTIITICIRYNEDTSLSVTTNQAWAKGSIAFFFLYYVFFGIGWQG…
KZM19098.1	>ST47_g9769	MWSSFVALLALSVNALAAPSKTSTVARVKNGTIEGVHSPSYNQDFFLGVPFAQPPLGDLRFRQAQSLNTTWEGTRDAKEYATHCVGYGLDQTFYKASEDCLYLNVVRPSGYDNKKLPVAFWIHGGTFTNGGAADQRYNLSFIVEQSVKIGKPIIGVSINYRLSLWGFTSSNELASEGLLNIGLKDQRLALHWVQENIEAFGGDPKKVTIFGESAGAASIGFHLTAYRGRDDHLFRAAILQSGNPIFYNAQRGANATQSAFNTVVSQVGCASSSNKIQCLRDTPFSALNATMNGTLSSTGGFAPVTDGDLVQDYGSSQLSRGEFVKVPIITGTNSDEGASFAPYGINTTAQFQAALTASNLPLTLQTSLLAAYPDDLSTNVIAALGNQRPAASFGYQFRR…
KZM19103.1	>ST47_g9715	MKCEQLICASLAVTAAAAPTFEKKKPSFSWKKTKSLIAFGDSYTYVQGLQGHPNYTYIGDNLDISFTPSELFSNRIVQNQTSTASGGPVWTEFITNCGVKEGLADPRKCDRQLWDFAYAGSNTNTVLTPLHWNHTVSLENQILQFERYGDPALQKVLKRKEALVAFWIGINDITDLAKLRGKNATFAPLYEQVISAQAELWERVYNLGYKNLLLMNLPPLDRGPSPSVNASLVNTYNTILASHAIEFQDAHKDATILQFDVNTVLNQVFNDAAAYGFTNTTNFCPDYNQPDIKTNPEKYGCGKGIDTYLWYNSGHLTTRVHRVFSKILVRWLGEQKR
KZM19110.1	>ST47_g9712	MRGYKIIVALSALLPLPIATALPSTDPSFDLSNLQWELKPTNSTQQFRGLSPVSERTAWVSGTNGTVLRTTDGGSSWSNVSPSLSPESSTAFQFRDIEAFSEKSAVILSIGEGNASRIYQTLDGGRSWKATFVNAEATAFYDSMAFENTKHGLAMSDPVAGKFRLIETWDGGATWKIVDSAGMPAALTGESGFAASGTCIEAAAGRWYIASGGVDPGRVFRSEDGHHWEVANSSLAGGAAAGVFSVRFRDKNNGIAVGGDYEKPTGKFNNAAWSKNGGRSWQSAENSPAGYRSGVSWVPQRGYTAVAVGTSGSDVTYDGGKNWQAIGNGTFDSVECIGKYTCWASGSGGRVARLKLR
KZM19122.1	>ST47_g9781	MPLFSRLTAAVRVFTLFLFPVLAASVSQEYDYVIVGGGLTGLVVANRLSEDKTKSILVIESGESVDNDQTMVPYKANDFAGSASLLWEGINSNQEPGLGNTSYPVMVAKVLGGGSVVNGMVYDRGSAADYDAWEALGNNGWGWAGMEPYFKKGVTFQPPSKKIAEEFNITWDLGTYSNGPLTVSITDSQFEDVKDYWSAWKASGVHVPVDGNKGEAYGASWYPNTMDRTTGRRAHARYAYLDPITSRTNLKVLTKATATKIIFDDEKKPTMAKGVDITYDATGQARTVYAKKEVIIAAGAIQTPKLLQLSGIGPRSVLNAAGVKVRVELDAVGSNYQDHPYATLLYKTTTGNITINSLLTDATYNASAWGEYVKRKTGPYTYARGNALAFVPLPNMVNN…
KZM19125.1	>ST47_g9741	MATVSVLVFAATVLAQGTKYGENHVVTQFDSQTVEQRAFPAPNVTLYSPAFAANASFAPGWTKGTEGATSQKDLDAFLQSFAQKNAAWATYDNAGFLSEEGNFFPYVRLASSSNSSSKVRVWIQGSVHGNEPAGDEATLALLGAMDADPTWAASFLDKLEILVLPRYNPDGNAYFQRTLATNFDPNRDHTKLVRQQTRDIKQWFSTFAPHIAVDMHEYGARSRYAGNYSNAADGMYSAAKNLNIHPDIRELAETVFAPAIGASLESKGLRGEPYVTAARSANPVRFDEAGTDAKIGRNAMGLTQSVTFLFETRGIGIANQSFKRRTLGGLQMILGVLETARDQAENVYSTIEGAISEVIASQEPIVVTDYTTYSNRTWTMVDTRNGEVVQIPVEFSSTT…
KZM19128.1	>ST47_g9740	MKLLSSLLASFALLSSLVSAITVTSIKGYNISNDVEGSVRLNGLSFQQNALTTFGNYQYVAFYATATGYGKHHVNLGRRQISPSIGAWQYLAFADYVQQTLDEHNTISMGISGDGKIHLSFDHHDVPINYRVSNTGIAKTIPSEWTAAAFGAVQHSLPGSTGPWTPLTYPRFERIDDGDLLMEFRIGQSGSGDSWIHRYSSTSGLWSNVGKYLQGEDNNAYINGLSSAGGNLYVSWTVRETPTPSTNHDFYFALSEDWGRSWKPTAGQTVALPIRPSTPGIKVFAIPQNSQLINQEAQCADDQGRFHALMRDNTTATSTFYHYLRTADGKFSKTAIQAPGLSTPPYLAYRGKIVAKGDSVVAVLPDAPRATVQLWGATAGGNWADWKKLGEIANMAGEP…
KZM19144.1	>ST47_g9723	MRFTSITFGITALLAAFVAAAPTPNGDVAKRMPTPEEFDALSTVQKREVYRAWYRATNIIAASDDD
KZM19150.1	>ST47_g9706	MLLFTLFTIFFLAAANVPYSSSSSLEVPTSVGNVIGIIDQITPDVKQWLGIPFAEPPLGPLRFLPPTKPKNSSGVILAQSAAASCQQYLKGVPNIFNLVPEFNPPKPYSEDCLYLNIVAPRNPKHKRLPVAVWVHGGEYTYGGINTPYEKPQKWVQRSQEHIVVQISYRLNLLGFPNAPGLNQSELNLGILDIRFAVEWVRDNIASFGGDPLKIVLWGQAAGGGLVDAYQYANVDDPIARGIIQESSVITLGDLHTDVNQTTWKWVADQFNCTGDAKQVLDCMRNVDAVMLETLLQTHTDSGASPTLYLGAVADNTTAFTRAQYMQMAAAKSIPKLPTLVGSTANEGANFVPYSADGTTTTEAAIRTATLSIFQCRVARETAPWMGAYHFAEIPLITGT…
KZM19153.1	>ST47_g9702	MHSCITTLLFLLATLSSALLAPSQDLSTLLPPSPPTHQPSTCLTRYSNYWDATENFVLFNSPNETHFAFTLVTKYLKFYPKTLTQWLDVSGFQVVNASTIPDSELCGWLSAASVEMNGRLRGTVGYKYSGNASLRTITPRHHIYNHMNTRPSDQTLRTITAILRANAPDADTYYSMTLLLGSACGILGFVVFSYGLVLTLELNKRMRAAPTDVEDIELDQIKVHDLSGAGMQRMNADPETDGPKCTIEITTPAVAGADTSSSKTSAADPPPIYSLDGVGR
KZM19159.1	>ST47_g9690	MRSFATIACLFLAYCTAVYATALTYRLEAHEKACFYAHVDFTGTKVAFYFAVQSGGSFDVDYSVVGPAVSGRNQKVILDGTKERQGDFVFTATEVGEYEFCFNNEMSTFAEKLVDFEIAVENEAPRAAIPSKQGSSPEQTTVLEESILKLSAQLSTISRNQKYFRTRENRNFSTVKSTEKRIFNFSLMEGGLMVLMAGLQVAVVRFFFQGARKAQHNTSPPHQIQIPGPHNRAANMPNTVAHTPRALAPLAPAPVQQARAPVSSAGVSAFAQREQQAATRRQQEDDAPPIAAAAGKKMRRARGDTRPLEGGKDFEARLAAWYERQRARQRPVPASRHARRTLRAVVAPVLAPPPPPPPTPQLQHQQHQQHQHQQHQHQHQHQHQHQHQQHQPMQALAPA…
KZM19166.1	>ST47_g9697	MRFSTCLALLPSALALPTLDFASYMTPRANAKSSLTGYLGVFFLGDAPNVYFYQSTGNNAASMNPLNNGDPVIVPTLGTKGVRDPSIITAPSDPKYYIIGTDLNIGATTWDIAQRNGSRSIFVWESTDLTTWKSERLIEVEDASAGMVWAPSAVWDQAKGEYLVHWASKFYGADDPGHTGAPSATKLRYAYTRDFTTFSAPADYIDYSPTNVIDLEFLDLGDNKYARFVKNETAKTVFTEVSTSGLFGPWTRPQGANSIIESAVEGPAVYWDNEVEGKAHLLLDFYGGDGYRPYESVDVAGGVWTPSDRAAWPKNLRHGSVLPVTKQQVEALNAKWA
KZM19170.1	>ST47_g9688	MALPKSMRYLAGATICVFVFLFVQILKAPSAGELEAPNKVPNTVPLSKEGQWDHDPQLDPSGEPPEPLRRVDGNNYAPNNPNSARINATILSLVRNEEIHDMLQSMHDLERTWNHKFNYPWTFFNDKPFTEEFKAKTRAATKAEVRYELVPAEHWDVPSWINEDLYRESVSLLTAQKVQYMEKRSYHQMCRWNSGLFSEHPALKDVQYYWRVEPNVHFFCDVDYDVFAWMQDHNKTYGFNINIYDSAESVATLWPETKKFLHDHPDYVHPNNAREWLEDGNRRPENNKKANGYSTCHFWSNFEVGDLSFWRSKKYREYFDHLDRAGGFFYERWGDAPVHSVALGLFEDKSKIHWFRDIGYQHIPFFNCPNSPKCKGCVMGRFTDGAQWLNREDCRPLWF…
KZM19214.1	>ST47_g9644	MLSSSIIAVCALPLAFAAPFCIRQNSTANVTTTCDLSNISQPANTLTPPSADLHLVLIARGQGTQNYTCATATSVPSAIGAVAELFNASCEVANPSEAQNSVVQAATIGNHFFADLTTPDFAIAGLGNTKTKKVEEVAAPNPGADIKWLRLQAQASDSTSQVKYIYRLKTVGGLAPTSCEGRAEGEVVTVQYEAQYWMYA
KZM19218.1	>ST47_g9593	MRGTTLSLLWLARLAAGQSSSSTAAPSVVTLTGTQRQLTGGEFGGTVTVPSDFEGSTFATLTRAPSGSTASANATVSASSEGSVIEIGGANRTRTPTGSGTGSAALPQNTQACNNYVEFCNRKYSNITEVAAHNSPFTTQRNIARNQEYDVTQQLNDGIRMLQGQAHYVNGTLYYCHTSCDLLNAGTVEDYLKKVVTWVEAHPFDVVTIIFGNYNYEDKDSNGNPLVTSSDFDVPIRSSGLIDYIYQPPKTAMELADWPTLGQMLIQQKRVVTFIDYNFDTDAVPYLLWEFYNMWETPYSPTDLNFPCTIGRPDGVSNDKAKDLLYLANHNLNVEIAIAGLNLLVPNVAATNSTNGLEGEGSLGLMSNQCTSDWGRPPNFLLVDFYNQGPINGSVFEVA…
KZM19223.1	>ST47_g9595	MAKGQVLALLLAQCASLASAAPLSCPKRSSVPALSSSLLSSTATPITASLSVRADAAAPAEYTANPRIGSGSSDSVESAHFRVLGASTSTKSNQTLQHLEAAHSCFVETLGWRTPGLSFNTGGVGKEVGPWYKLNVYSKQASDMPGAAGVQGTDMEAGLAYLDVVDEFLDVPDVVVHGFGHSMHLSEHNWVDQGNTGAWWEPIANFIADTYVSTPTCNAARAAAGLSGKEGDSVIELQKVIGDSHQVIVDGTVDSGNYYQSWPFIAYLTNNPDSYAGLGNDTLLRMIREYKLQSNETPLHTLERLLSEASGNVTVQRVVGRYWAHMAYVDIGHAKAHDAFTAQRRSLSYDNLDGSNGAYTVKSARAPRYMGANIIPLTATGASVDVAITSEDAGYTATL…
KZM19225.1	>ST47_g9592	MKDKYTIPLVYLTSFVFLFGETLQPAPRVAIYESIVCQHYYASRGPHDCKIAPVQQELAFLAGIERLSVIIPSILAIPFAALADRYGHSLILAIAVLGIFLEDAWPFLVCWFPDVFPIRLIWLHFLFGLVGGGFTVVVTLLHVIIADVVSAEERTNMFFRARAAGVAASILGYAASGFMMRVSAFLPWAVGLVCLLMSTITALSIPKMTVQDHDVSLEASKPAEGWGVSSLARALRSIAQLLVGNQQVLAMLILVFFCQLGYDSVPLMLAIYISKRFGWEFSDASFLSSLEMGIEFLALVVLLPALTSGLPLGFQRLSTFAKDKTFAQASLVALAVGTFCLGFAPVVAIAVIGIVTLALGTGQDSLTRSMATDMVHVSDLSTMYSAITMLRAIGGSISG…
KZM19232.1	>ST47_g9635	MVHFTSLILATAAVVGSVAAAPEPDVNPFQGKDRHVVSSYGKKLEQTIAAFQAKNDTLHAARTRTVQQKVSTFTWVTSRAHLSNITTTIAEARQQKKKGKDMIVGLVLYNLPDRDCSAGESAGELQIDSDGYRIYKSQFVDKYAKLVKEAKDLTFAIVLEPDSLGNAVTNQGIEACAKATPIYEQGIAYAISKLQAANIHLYIDAAHGGWLGWADNLKPTAQVFAKVVAMAKKLNPASKIRGYATNVSNYNSFNAKVRENYTEYSPSWDESHYASALAPYLEAEGLPSKFIIDQGRVAMSGAREAWGEWCNVSPSGFGPLPSTKTDNAHVDSLVWIKPGGESDGRCGLEGAPAAGAWFDEYVQMLVKNADPPLEPTYKKV
KZM19235.1	>ST47_g9630	MRSTTTPATAWLQCSALLHIPLFLSVAVAQMPYNPTRLLHNGDHLYVFQPSSRLPNQFQLGSIDVSAKFDAASPPYTTLYATLPFLDDTTARAFTPVLDDGGNLTVYAGNCSQGANGGEVWSFTPAIGDKQGSWLQHDALIASEKHAATTGANYLSNGISFSSIVGGNAAHTGAYFFGGMCPTLVGGSNSWQSAANYSNLMVSLQPSGVTNSAITYQMDISPGRGPPIPEAGFTMTGLSPTYSNRSDESQTQQQNFVLVGGHTSAAFINMSQVALFSLPEQGWTFVNVQQPDASHASVVTRDISAVDPRSGHTAVLSSNGDQIIVYGGWVGDIDSPAEPHLAVLNVANGYGGNGDWRWEIPETPSGYGPPGNSSLYGHGAVMLPGDVMMITGGYSVTTS…
KZM19269.1	>ST47_g9606	MKFSLFAAAAALVGSALGADAVKGAAEGFAKGVTGGGKAAPVYPSTTAQLISYLADSSPRVIVLTKTFDFTGTEGTATSAGCAPWGTGSTCQKAINKDGWCDNYQPNAPKVSGIKYDKAGVLGMTVGSNKSLIGQGSKGVIKGKGVRIVSNTKNVIIQNVRFTDINPAYVWGGDAITIDGADLIWIDHVTTDLIARQHIVLGNSASNRVTISNNEINGASSWSATCDGRHYWGLYFTGSSDMVTFKNNYVHHTSGRSPKVAGNTLLHAVNNYFYAISHAFEADSGSKILAEGNVFQNVDAPAQAGLPGKVFAAGSASLNSQCKTYLGHNCELNAHGSSGTLAGSDTSFLSSFKGKNVAAASAASSVKNLVNTAGYGRI
KZM19301.1	>ST47_g9516	MFPRSLILLASAGAAVAQLVPECEHVADVAALFQADDGKTYCSSILSVGTVTDTVVESVTATETTTITIPSQVTLSMTTTQTDTVSSGTVTETAPTATATTTFTESNTVYSCTTEIARRGLEAQSTSCTKSKITTTPTPVQTSTTCTKSKTSTTPTPVKASTSCTSSQHATAAYGTSQPAAASSAQADYYASRSSQAAYSPSPIYGESSASTYPESTAEGYSAISSQYFQVSSSAPYPASTPGVYSSVYYNAYPEASSAAYEESSSQYYSASSLESYSESTPEAYPLTSSVYEQISSSLAYPTFSSYSEYPEESIYSSVYYSSGIITSSEIFSDIYTPSPTLTPTPTPAPSCDTAPTAVQKFGCDTVSAACGCLGLVSATAQVTTTTTLTEAAYITEAM…
KZM19311.1	>ST47_g9524	MQLALITSILAFCASQVAADGAITVCRGANGASCSTIGGLARPDNCSGGCLSAPGTKSVKAANVDPGNYCFTAYSDRNCNSGALKVEGHFQNGNFEAYSYDCC
KZM19354.1	>ST47_g9506	MLFQKLAIVATLTAIVAAQDISQDDIPQQCTQVCAQVVTIARDCDNQNDNDNAELQCICNASNASTLIPACEACVRQFDTDTDDDNDDDDDDDDNDVREVLTRCNFTVQSSFNSASASSVASTAVSSAASATASGTILVTTSGTSVLTTSIGPQQTQNAAPVVTAAAGMGLGALGFALGML
KZM19361.1	>ST47_g9523	MRPQLSILAFLYHAAATGAASVLLSNASAILTFDSKTEALLVLRHGSVLVDGDRITGLYEGAAPNSLPNNTEVVDCAGKIISPGFIDTHRHGWQTAFKTIASNTSLAEYFLRYGEYVAGSYFTPEDVYIGQLAGLYEALNAGTTTNLDHAHHTWSNETSEAGLKATLDSGARVVWGYTFHNVSNFTVPEQIANFRDIMASFPSNNTLVTPAMAYDHWASNPYGKDTQDIMALAREYKVSAMTAHYLGGPWDNANSPELLQTLGFLNDSIPVVFSHASFATAMDAKLLRETNQYIANTPESEMHYGHTHEHSYDIQDQMALGVDTFFTYSTDMPTQARIWLQSARYQSYNQIMSQWEIPPYDPMSVNQAFLMATRKGALALRRPDLGIIAKGAKADLLIY…
KZM19372.1	>ST47_g9467	MPPALFVLSLFWFTKGRFLVQDSEGGKLNDRESECTTDQRIGVLTQALQTPDHPVHKLIETKITEITKINEQSAAMDLVRDEIARIDEFYRAKAEDLALAAMARATEYYKDSLANAKKRSVANEEKMTSIEDRLHVVQQQVQGQLPEAICRKIASIINSMAKTTIEKADQERFRKLASTTSNADHELLEELQNKVLGYDESLQGLAGLPAEISELKVGVKQQMDDLRSAISGQDESIVKLVDTHTLPRAQGTDAEVLSKLQDKIDNHDTQLQSFTKMSNDLGELETEVKTFAKSLRQLSAVVSTVQAMEISLQKHDGQIMELNGASANVETSIKQHEQLEQKIGQIEKNVSREASSHEIILAMQGKIEKVETSLAELGSVRSQVGVLGERTTSFEDRVA…
KZM19374.1	>ST47_g9469	MKWTTLATAFAAVPLASAAGFTKEQYRSGEVMAKMMESKESAWAKQRAAGAYDGKKWKDFHKKRVNKDRIECKHGRVEAVKGDADQTYKCKDIDLYDFKTHEELGNPGPAEGSGSWGWTYRGREFIAIGQTNGTAFAEVTSRGQLEYLGRLPAQASPVIWHEMKTMQEYLFVGSEGEGHGVQIFDLKKLLKLNPKWPKTFDPATDLTAWFNDLTEGAGIKGRSHNVVTNEEKKYAVAVGSGGRAGRNDTCAGGLIFINVDDITKPYKEGCAPQDGYVHDAQCIVYRGPHKKYYGRDICYGYNEDTLSIYDVTNKKGFNASTLISRTPYKGASYTHQGWVLDPMWQTHLVMDDELDEGEIDGGIDTDPDSVAKDGYPATYIWDITNLEAPKNTGYYKSST…
KZM19378.1	>ST47_g9525	MRISTLAFAGLAAAAPSSLVARKDGRPDYSGTYWDVTISTQSGRPGYSIRDLTTTFHRAGAEQTVPGSCHYSFVPQGTSAPAVTDRCDKGLTYTWNYTTLTMRQDVVVGNETIWFFATPTKIETTRKSDGTGGSSYTGTGRVELHHYCNDHGCSDVDGCVTIECQEGKTN
KZM19383.1	>ST47_g9485	MPTIGAQLRKWTAFLLLCSTPTTVLVQSTNNSVTFHTGATAPLSVTTHGASPALSRPTAFSRPYADTDTICSYRTINYITHTLPQQCLKTSWSASIPTVSINETAPAAETTPTPQTSASTTKEGAEEWVGESTGDAAAAATASSAEVTPSGDIVAGSGTGSTEPDAELETDSPFDNANFLSFDEWKKRNLAQAGQSPENVGQGRAASAEQGSRRRPVNVNALDSLGEEAEIDIDFSGFGDPSEGSSIGSDVASKAPGAEAAKASGEADKAGSGSWALSKDAGKTCKERFNYASFDCAATVLKTNKKAKGSSAVLSEHKDSYMLNECSVNNKFLIIELCDDILIDTVVLANYEFFSSMFRHFRVSVSDRYPVKMERWRTLATFEARNSRDIQPFLITEPQ…
KZM19385.1	>ST47_g9487	MKSAIALSTLSLLAGAEAAETVLGAYIFHRHGDRTPKALAPTNLTTLGYEEVYRSGQYYNSRYITGTNKIKGINQDIVKLSQLSVSSPVDNVLQNSAMGFLQGLYPPVQTVQTLGNGSDVSAPLSGYQLIPVNTIATGAGSEDAGWLQDASSCANAKTSSNNYFDSSEYQKTLAATKDFYNSLVPVVNETLTADQVSFKNAYVVYDLINVAEIHNSSIPSSDVLTNETLHQLLTLANEHEYGLAYNASDNMRAIAGMQLAGEVLSYMNSTVTSKGANKLGIQFGAYATALSLFGLLDLPKANSDFTGVIDYASSLVFELVTNADVSSGFPSTSDLSVRFLFHNGTASNTSQPTTYPLFGGSSDTVSWPDFQSKLANIAVTNSEQWCTKCGNSTGTCAAY…
KZM19401.1	>ST47_g9442	MHLQLATITALAALSSALPTLKVRQSGPVLASTTYDAISISGGQAGNAEAEALAVFSALDVNNPGNIDPADIDFLGQVNDVANDAETGVFNPAIEAATGDEADALSAGKIKNKVLKLMATKIELEAKQAQGEDVAAKLEDETKKLNNNIATDKESAGKPSTALPFDASITGGGSTAAGAGAGAGAGNNDATAGNNNANQDDAAADDDDDDAAADDNANDNADDKAANNNQNQNQNNNAGGNASNNAGGNANNNAGGNANNAGGNANNNAGGDGGGATGNFLFGGN
KZM19420.1	>ST47_g9362	MHLTSFFTLFAAATILGAPTEPIEPTGITSLAADVLDQGDGFYLASYNEAGVLDVAFTPIAKLETTSPAAQLTTRATHTLGKRETVCSGRSSVALGTLDDANRQLASNAAAQGNYGKSSWGWVHRDAETSYFCNYQANFLTYQLIIDMHTVISGRCTQAGYGYDRRTNGGGAQDLSVGRTWRGDNFCDGNYHG
KZM19436.1	>ST47_g9418	MLFTSILRALPAALLFSGAQGTPLGDLESRQTTIDAFIGTQTTVSINGVLANIGGGGSKAPGVPAGIVVASPSRSNPDYWYTWTRDAALTYKALVERFIAGDTSLRQEIDDYVSAQAFLQGVSNPSGGPDSGGLGEPKFNVDRTAFTGAWGRPQRDGPPLRATALAIYANWLIDNGEKTQALNTVWPVIAKDLAYTVRYWNQTGFDLWEEVNGSSFFTLAASHRALVEGAALATKLGQTCSGCAAAAPQVLCFAQSFWTGSYIDSNINVNDGRTGKDANSLISSIHTFDPAAKCTDATFQPCSARALANHKAVTDSFRSVYAINKGIAQGKAVAVGRYSEDVYYNGNPWYLTTLAAAEQLYSALYQWDKQASITVNSVSLGFFKDLVPSIATGTYAKDS…
KZM19483.1	>ST47_g9326	MKSTIFSIVPFVGFALAQQGCNKLTVTETETSYVTVQPSQVSYSYITSTIGITNTITVGSSSSAEASTTGLHWGSYPNGTYGNHTGRPQPTVSSVSLDYTPSAVTETPVPTYAPGQGYSQSSETSETPVPTFESSSAYEAQAAPSSFVKAVKVKAVSAAGSKSGQATFYGGNTSGGKCSFTGYTVSSSLFGTAISDSNWDGAGSCGRCVSVTGPAGNKITAMVTDQCPGCGVNHLDLYPDAFNKLSNPSAGVIAISWDFVPCGITSPIVLKNKEGTSAYWFSMQVQNANIGIKSLEASTDGGKTWKQTQRQDYNYFQYSSGFGTSAVDVRVTSITGQTIIVKNVSIAPLTTKKAASNFS
KZM19497.1	>ST47_g9336	MWRRLYFLLILVRVYFALSPSYLHPDENFQGPEVIAGRVFDYPVHETWEFTAEHPIRSTFPLWLAYGWPMYMLRWLWEGFGYAVSPSVVYWTLRVLMLALSVVMEDWAVHELVDSPRARRVAVPLVASSYVTWTFQTHTFSNSLETLLVCWSLVLIQRIVRDKKRSGILASSMLGFMLVVGLFNRITFPAFLLLPSLLLLPHFKRKPLSFVFLTLSAFFAAFLAICVDTASYTPGDFTLSSVLSKPVITPFNNFIYNSDSANLAQHGIHPRYQHFLVNLPQLLGPAFPLLFFLRPSHTTPILVSALSGVALLSIFPHQEARFLLPAVPLVLSSVRLPFNPGIRKLFTATWIIFNLALGMLMGVYHQGGIVPVQMHIAKTNETVTHAFWWKTYSPPTWLL…
KZM19501.1	>ST47_g9400	MRSYRFLLVCLALFLCVHSVTAVPQSAVRRQDDSPSDRSQSSTATLSSRPSATVTSSNEDSSASRAESNRASSTAAASKSSAEASTSVQVPVATASTAPQSTSSPEAGHENALPFQPSLTPAMGISGVIMLLSGLAFAVIGIKNKWVYVFGSAAYLTALAVTVLIVYLMNPPVSNGVQGAFFVAAFFTGIIFGAISLVFPDITEGFGCLLGGFCLSMWFLCLKSGGLITSVTGRAIFIGCMSAGGYCLSFSHHTRNYGLIASIAFSGATATILGIDCLGCAGLKEFWLYLWALNDNVFPLDTNIYPVTKNIKAELAGIVIIAALGVVSQLRVWKLVKEHREKSAAQQLEKQQVQEREEEALGRQIEDSFQRERAQWEVAYGDKSVRDSSVASSTLSPKH…
KZM19511.1	>ST47_g9422	MHLLNLLYAALLSACGAQALRSDKVKLSNIQSLTLRKGLDTSHRRVNAMPQLSCIGGNAKGLYEVDVMRCKNSGSDYDSENIQWTCTASLPDEFKLGSTDVICEGYDYPEDPYILKGSCGVEYRLVLTDKGHEKYGRGNGGHWWGGDDEGSGREGPKTLGEQVAAALFWMVFIGVAGWILYNIVRQWGQGPAGAGGAGGDRPGWGGGGGGWGGNHDTDDPPPPYDYQGRPGKSTYGTNQPQGWRPGMWSGALGGAAAGYAAGRMANRGNQTNNGWGSNSGGWNNGEGSSRSSSGSGSSFSNTRHESTGFGSTSRR
KZM19526.1	>ST47_g9384	MVNMGLKARGAALATTLLFSTAATAHEQHMNKIEEGHAVSEDPIDSILWTHILVQSLAWGIIFPTGMVLGITRSKWHVPVQVTGSILAVVGYFLGHKHKGRQFTENIHAKFVPVIMLMLVVQIVMGVYLKLHLEKGIHGKIRRIVVKAHGVVGKTMPIVTWVQFVFGGITALGFCRADHTGQCLAHFIMGSAFVAYGIILTILLLVGQMWLKRTGRSQEFFDSLVIAAWGCVNTFTEHRWGGPWVHNDLQHTSMGIIWWAAGLVGVWLSRKRNGQPKRNLIPGMVIFVTGWAMSSHPQHLPISTMIHTVFGYTLMAAGAARMIEISFVLKDRIAVTNDLSDPDPNSFQYLTPFLLIAGGFLFMGATEEQMQLLADANVTHVSYVLILFSVAFLMFLFAN…
KZM19527.1	>ST47_g9385	MVIQIFTAKKQWTALFLFLSCAVVPMVVLGYFTPEPSFAFGTWPPFYNVFATKTMSCDNRDIDYYPVNSTITGIEGLFVLDQTWGRFAFSTVKTIDAAWDIVFGRGVQLLAWWAAYIVFSDALLRVIERHPASFRIFQRIALEGPSLLSLWTLCKEVLSIKSKRTKLLFTYMLLSTSYVLCIPVFLGAMTGYDSTAIAWIDIDNSNDIVPASAMKPAWVITGTRNSTFDHKVCSDPGNADIQSQYFSPRVDHCGFLFYNYGTFRYYESFALSVSTSSPLEEGISCMFNYHGSDGTWDATESEQNASPKEVIYNCNETVTLRVNEQTYDIQNLNGTLALCYNNEAYDHWALQGKSRCLPDTANPSYQWGFSTMLSGIFVFIHFGWCVSMYILWLDAQSKS…
KZM19541.1	>ST47_g9268	MSSGVRIYLWLALCLQHLAGAHAIQSRQYHTQPSGRQRISINSDWRFWRSETNPDNLIYDNRTDTPQQGVTYLRPYILPSANEFIADASKHHVAPSGNPGGNVSYVKNAFDDSAWESITLPHDWAIQGPFYEGDNVPVTGGMGRLPIQGVAWYRRKITLAAEDKNKVVYLDIDGAMSYAMVWLNGNLIGGWPYGYNSFRLELTPYLRPGDDNQLAIRLDNPIDSARWYPGAGLYRNVWLTKVEKTHVAHWGTYITTRDLSSKSATVDLVVQVKGTAGQKVEIVTEVHTEKGKKVADFPRTTIDLTGSTSGVTNVSVSVKNPQLWGPPPTQQPHLYVATTRIFNNGSKTPIDTYETSFGIRAITYSGDGLFVNDEHIRIQGVNQHGDLGALGVAFNVRAA…
KZM19545.1	>ST47_g9073	MFLKSALLAAATLSSSVLAAFGVTKSGDDFVVDAGSSNALVFTVNGKNCDITSIKYLGEEFQYASKGSHISSGLGSATVQSAIIGTTAKITCTTSTLTHYYVVKSGESTIYMATYTTAEPDIGELRFIARLNPNTLPSEYPFGVVSTTAGSSSAVEGSDVFVVDGQTRSKFYSSERHIDDSRQCVYRGEDVHVCMLLNTQSYEGSSGGPFHRDINSNNAGDSTNLYFYMNSNHVQTEKYRMGLHGPYAMAFTRSGIPSGGSSLDTSFFKDLSITGYVADSDRGKVSGTATGVGSSFQTVLHWYNDDAQYWVYADSAGKFTSPSMKPGTYTQVLYQGEFKVKAASVTVNAGTTNTANIAADAETKTSVWRIGEWDGSPKGFRNAANQLRMHPSDSRMESW…
KZM19549.1	>ST47_g9077	MFGFNDATILFVFVFLHTLFESSHALPDLQRRGLPGAVYTCTGEQFSEDCGWSLPTTNCRIASAKSIGPDPGGYCTLYKNFDCTQSVRTLLFPGAGTGLPEYMSFKCGVGVGTSGTVAPMANANTDQVFKTLPANRLAGGVGSLERKAHLKEIQAMEKDGFSEGLIGLKKNVYY
KZM19550.1	>ST47_g9078	MKLATILALATAAFAGETINNEHLKTEVVTEQSCKRPTVAGDKIHVHSDRGTLASDGSEFDASYNRGQPLSFKVGSGQVIKGWDQGLLDMCPGEKRKLTIQPEWAYGSRGAGPIPANSVLIFETELVSIDGVSKDEL
KZM19580.1	>ST47_g9140	MQFFTVASALFAAAIAAPAPQTTGCPNPAHCGPAPDPSKYENIDISEFYLRKNNGIQNAGFKLSGNNVTDITCEIGVVPSLPSEVTTCGNSSYRFSLIEGKQSDYGLGIYHQTAPFSGKYSSGDVSTYCHAGGDGPDDYVCSQTDALTIVITGL
KZM19613.1	>ST47_g9106	MPSAKSIVPLLWIPIAASRNASVDLSWHAPKRSWINDLGQVLNGTGTNGFAFNGSQLPAGVPYGTYNWCNMPHVRREEYPKANEEFELQYVEVIHRHHKRTPYASNTFPKESYGWSCDDQGLFYYGKPLNPAGNESSSTYWSVYTSETNPFAQTGFNGSCQFPQITREGLDDSWQHGKDLFGVYHDLLGFLPDDLGDKVTYRVTNNQITSQVAGMLINGMYAPKGDEPLHIQPAGVDSLEPQYSCPAASALSSSYGVGSKASNWTAHLTAARPLFDTLDSISGIASDSPDWHKSFDHYYDNLSARQCHAKPLPCNTNDTSACVTREQADAVYRLGQYEYSFIYRDSPQSLQASLGSYGVWLAELAQNIRDVQAGKREVIYRHNVAHDGSVSRLLSILQV…
KZM19614.1	>ST47_g9107	MHSLFLICFSSFVAGAALDPRDPVPSGFSAPPYYPTPHGGWLSAWGESYRKAALLVANMTLAEKTNITSGTGIFMGRCVGNTGSALRVGIPQLCLQDGPLGVRNSDHNTAFPPGITVGATWDKDLMRRRGVAIGEEFRGKGVNIHLGPSVGALGRKPRGGRNWEGFGSDPVLQAFGGALTVEGVQSVGVIATMKHLVANEQETYRMYSLVKPGISSNLDDRTMHELYLWPFAEGVRAGVGSVMIAYNAVNGSASAQNSYLMNGLLKDELGFQGFVMSDWLAQISGVASALAGLDMSMPGDRNEIPLLGNSYWMYDYSRAVLNGSVPVDRLNDAVTRILAAYFQMGQDQNYPRPNFDTNTQDAEGPLYPGALLSPRGVVNEFVDVQGDHAEIAREVARDA…
KZM19621.1	>ST47_g9303	MRFSQFIFGILAMLLGVLATDNGLQTVVEWDNGSLQVNGERVIVMSGEFHYARLPVPELWLDIFQKFRANGMNTVSIYFFWSYHSASKGVYDFTSPGKDLQRLFDAAKEAGLYVIARPGPYSNAETSGGGFALWTSDGSGGSYRTSDETYRKAWSEWIAEVGPIIAKNQITNGGPVILTQVENELTESKYDPNNTLVIYMEQIKAAFKEAGLIVPTTHNEKGFRGKSWSTDYNNVGGAVDIYGLDSYPGGFSCTNPNTGGSVIRTYYQWFQEVSPTQPEYLPEFRGGWFQAWGEHFFDECQSDLSPEIPDVFYKDVIAQRATLLNLYMTYGGTNWGHLAAPVVYTSYDYDASIRETREVRDKYKQYKLISLFTRVSKGLHNTVMESNGTGNAVSTPDVF…
KZM19623.1	>ST47_g9301	MQIKSAFVAAAILAFCEALATPISARSPYVVKETHFVPKEWQKQDRAHGGKTISLQIGLKQGRFEELDRHLHEVSDPDHARYGQHLSAEQVDELVAPTAKTHDLVHEWLQENGIETENLSYSTAKDWVTVRLPIESVEKLLDTEYHNYKHHDGSVVARATSWSLPRHLHDHIDAIQPTTSFFRGSKDVATYFEGAAEIPQGYQTPSNQTISAVCNATSVTPQCFETLYQTKGYKPKALDKNNVAFNNFLAEVPIRPDGKQFLQKYRPESVAQAANFKQFSIDNGPVQDGPLTANQTADGKSREANLDFQAIAGISYNTPIISYSTGGSPPFIPDITTPDNTNEPYLVWVNYLLSQKDLPKIVSTSYGDSEQTVPRSYAERVCKQFAQAGARGTTLLFSS…
KZM19625.1	>ST47_g9304	MDILRWPPVIRLATLSLLLSPASAQNDTTTFDGTNKTQLDLGRCPWLIEGELSPNASVNSTGSVNLHWNALMMDPSQNDWTFTLTYNETRTQSAPTIHYLQSYVSAPESSDAKTCVTMFSGLNATSSSGGRNGCDGVLDETCTKALQKISYSERCTLPRPTEEILGRIREACGSDISNGGPVTTGTPQDFSNKTCSISHPPGSTSPDNFRTWSAMGQGIDLNRIDQNASDFTWYDLHVRQTVPFVISADFAGGVAETQVVTLKKESTHAKQHACFRLLWWLWYRLRGQPDTYWYSAWASIGVSSTHLINLHLPPRRSQAMLDTVPTDPAAEKEARSSDKCQSPANNSPTCELKMVENVALPRA
KZM19627.1	>ST47_g9318	MKLSLGLVSSLLLSGASIASAAAWSFEDATVSIASKGAGVGAASKNALGATKPLAKAVSLGATDLLKLDLTTVDGKTAKRPHQAFLTLTDPATGLEASFVLNVKDSGKAKLFLSHKDLPHQFLTSTKPIPASIVVGAFGSSAPYKQKVFDLAVTRDANVPLAIPEPPLRYAAEPEIHHVFRDDPKSPPKIITIFFAAAVAAALPFLLGLWATLGANVSHLNKALGAAPVSHALFYGSIIAMEGVFFLYYTSWNLFQTLPAAGLVGVVAFLSGSRALSEVQERRLAGLR
KZM19639.1	>ST47_g9085	MLFKSFLFASAASATCLHGLSMFKRAAGSENGTVEVNTFGYGPQDGPFSWASLAPENEACKAGTNQSPINIDTEDLASNLTRRNVIIHKRACVNETTSDATIGAAADRPVVDIPEQAVVFENLGTTIEVVVNGTTSFNGTDFRLVQFHMHTPSEHHINDEYFPLEVHMVHQGVLDNTQLAVIALMFQVSASDSDPIIAGLSSSLSAIATPGTKTSIEAGLDFSSVLSKIETSDILQYSGSLTTPPCAEGVTFLVVKDPLDVGVADYNAIKSIVKFNSRFIQNTLGGENMLAVGANSGAAAANATA
KZM19641.1	>ST47_g8938	MPSTIFTIATVVAGLLASTASAKGNVAIYWGQGANQKELSVVCSDPSVDIVNIGFVNGFPKSRNEYPATNFGNACGPGYFTNPDGTESRFLSNCPIITRGIKVCKSNGKKVLLSLGGGYPPDYYLDNVDAYKWFAETLVGSFGPYNPSASWPRPFGDAAVDGFDLDIESTSGQGNYQWQLYGDFVNYLKKQSPGMLISAAPQCIVPDSHLDDAIYRAPFDYIFTQFYNTDQCSAKLGYQQLGQASTGFTYNAWADRLQKRSKNPNIKLYIGLSAGLNGANPNHYLKPEEANALITAYQNKPLFGGVMLWEATVSQNNTVYGQSYSNWIKYSLDGTFKDKYKPVVSSTIRSSSTLVSSTRTSTVISKTSTPVSSKTSSAVTSKSSSAVVSKSSSIAPSTK…
KZM19661.1	>ST47_g8973	MKSLVLSLLALASTSAAHYTLPELVVGGKGTGNWQYVRQTANYQSNGPVTDVSSTAIRCYQLAPGTSAKTYTVNAGDTVAFTAASSVSHPGPMQFYMAKVPSGQTAETWDGSGNAWFKIYQEEAITTSSSISWASMGKTQIPVTLPKSLPSGEYLLRAEHIALHSAGSSGGAQFYLSCAQIKVQNGGSGSPSPLVSFPGAYKASDAGVLVNIYYPIPQNYKPPGPAVWTG
KZM19664.1	>ST47_g8953	MSRPLRLLLSLTTSLLAVTLLLYLTLGAQQDQKLEGASHVPKQSSVNALFSFTSPGSLFPPSAIISLTDDNSTFFLARPAAFGPLLPSDGLSGPLWIGSGFGDDALSRGELGCSDVPGWDSGSDALARARKPAAIARTRRTGPLAEKKDQPRASASEDQADAPPKDDGTDDHLHPTFDQSTRHPSEHADIQSLQESAEIAGKVVLLKRGGCGFLAKVEWAQRRGGVAVIVGDDVRGGALIRMYARGDTSNVTIPSLFTSHTTAHLLSSLLPSGRILSSNVAPSDSEASPQENKPTATDLVSPSSFTPSTSRQDGPLGSTKGYTTGKAWLHSLLSAIGLGSGQEQPTDNFKIGEDDWRDPKFRNLHTTTLPALLTSTPTLTASLVSSSGHKVETKYTVPS…
KZM19669.1	>ST47_g8952	MKLLYLALPLLGSLAIAQSLVEDACQCPQVRCPDSLTYLCPRKTTTPVSTLPTPSLPILGIPTPALPTPALPTPVLPQGPQLSDTPRIPGCVCEEMMCIQSYPDSCHCAYGIAKTCWQKCGGPSPGLNTCPPLGSSPFDGPVKRAAAPEPQTTPKESPVPTPVNLPAIVSEVRAPLASGAASPTKKCRCESRKCIQAFPASCVCDNANKHACWKKCGGAKPAFGSCSRPTKPTKPIPTPTPTSDRKVQICGGGRANTNLCPTGYTCINDPYKSGCGLECDGTGICVKEKLCGGFAGFKCDGTGQVCVDDPRDDCSPATGGADCGGLCVWPPALRLN
KZM19687.1	>ST47_g9216	MLFQATILALLASVSLVTALPGGDTKTKTKTKTDTKTESKCSAVYSTKTYPGEKETTYLYTKTEVVPYTTVTTKLSTSSSPYPFTNTNVTKSYYETKTYYETAPVVVTSYVTKTKSDVKTKTSVETSKSTSVGTTYKPVVGTVTYTDVGSKTKTDVVTKTDKVKYTKTEVETKTACTTKGGYGGGW
KZM19699.1	>ST47_g9277	MARYTSGLVLAAALLQVGAQALPSGNVTAVTCPSTAKFNTITANAFFAGMNPGWNLGNTLDAVETEGSWNNPPVVASTFDDAKNAGFKGIRLPVTYAYHYKTQAPDWTLDPVWLQRVADVIDMITSRGLYVITNVHHDSWTWADYTKADANTTVIEERLYKTWVQIGQKLACKGEKVAFETINEIPGTTEAHGKEVNRLNNIMLQAINQAGGFNPKRVVNLVGSREDGEQTSLWFEKPDAKYKNPWGIQYHYYSPYDFVFAAWGKTTWGSDADKATLEADIERVRGNFSGVPIIIGEWAASPVETETAARWRYFDFFARIAAKYDTQTVLWDNGAYFLNRATHTWRDQVGLDIYLNAVKGIPNALPDSTTDSAATSQKSSAYIYQKKNTTVTDQTLPFL…
KZM19707.1	>ST47_g9279	MGVVERAWKWSALSCLLTTTASAIQPTVKVLNGTYEGLYLPGFNQDVFLGVPYAQDTGSENRFLVPQSLNTTWNGTRLAKQYGHACPDPQTERDAEFGMSEDCLSINIVRPAGLSANESAKLPVAVWIHGGSYQVGTSALPNYNLTYLVQRSVEIGNPIIATSINYRKGGWGMMYSREIQGTGNTNLALRDMRKGLAWISENIGAFGGDKDSVTIWGESAGSFAVGQLLVSYGGRTDGLFHRSIQESGSVATAWYNGSDWYQPIYDNIVDKTNCTTLPDTLACLRTVPYHTLLPLMAKPVQGPGWYPTVDGDIIPNFPTELLHAGRFAHVPHLYGSNTDEGTDNAPAGGVINTTQQLYDFVKGSTGFGFPDAVVTKLLELYPEDPAQGIPLNTGEERFA…
KZM19738.1	>ST47_g9061	MLSQAIFSLALLATQGLAKKDWVKGKAFDRIAIIWLENTDYDLAIGDPNLAALAKKGISLTNKFAVTHPSMPNYAAAVSGDYYGVNHDDMIKIPSNVSTVVDLLEDQGISWGEYQEDMPYTGYQGFDYRNQKSGANMYVRKHNPAVLYDSVAQKPERLANIKNLTLFQEDLANNQLPQWMFITPNMTSDGHDSTVTVAGTWTRNFLEPLLNNKNFMKKTLVVVTFDENHSYAQQNRIVGLLLGDAVPEQLVGTTDDTYYNHYSELSTVQANWGLHNLGRWDVGANVYKFVAEKTGDSLRKWSGAVPFSQMFFNSSYAGQLNNKNTSVPWPVPNSEAKHAGRTVLPAVVQTWGKLKNQTAYTKGVEIPDGMHPQAEFK
KZM19741.1	>ST47_g9068	MKFFGTIVVATALFASGISALPLSDLGGIHPRAPADYDINKVLKIWMNDAKTQRRLANHCNTKGGWEGWAQGEIESEFRDAFAIPQTIREETSVYKGRELADLVLPKTAKKRGMVIELKCENAYGQKGVKIKAPVRADIAKQSAVKPEFNDFTFIALAMAYTKEADASLRKIGMKPIRGADANVAGPHTVRIYREDYKLKSLIDEIEDLDKAMYNLFLSKSRPGSPSGTPPSSSNPAPGKTAPGKTAPGKTAPGKTAPK
KZM19759.1	>ST47_g9298	MLVQVLTTLSTLLALALCSPSAELSPSSAFSPYFVVADFEAFRAAPAYPEMHSRAVFNLTLVHPDPAQRWSTMCLAHMASDLCNTTDYLRCEPVGDAAHADERLRFKFSANLDSVEIMRLWTYQGMHMKTTASEGTYWNKDGKDANVTESQYGQLYKRPAEWVFAWRSTVG
KZM19767.1	>ST47_g9322	MRPTPWTASLMTLLALAGPSTAYKAHANHSVAETPDALFSLYGDRPDGCPPCFNCNLDDFKCQQFAECSKANGRCSCPPGFGGEDCSEPLCGSLPKGKDRSPRGGEQECQCDDGWAGINCNVCQTNDACNAMMPDGEGGVCYKDGQLVKENFQICDITNKKILDQLKEKKPQATFSCNADTEECNFQFWVDQRESFYCALDTCTSDWAADSDRNTTRYRCENIECACVPDRMLCGEAGSIDIGDFLKDGESGSSFSEPAMNDLISSIFGDESILLKCDTGECLYQNQVPGYERPIKKINTPLIAGVIAAVALNKYGPIHLSDDEEDDNAKLLADHKPAALMFENVAYNLKGKQILSGISGAVHPGELLAIMGASGAGKTTFLDILARKNKIGATSGDFY…
KZM19773.1	>ST47_g9152	MHVRTRLATLLACAATVFAQKCFFPNGGEVTSDTACNPNALVSACCYDNQACLSNGLCVSDPHDPVKARLHRGTCTDADWKSGNCPRHCLDVDNNGVPVYSCNSTATDSYCCYDGCDCKTNSGFDVFTFAQSPADVYTLTIIGESYTQTHTSAASSTSSIATPSASASGTSSGALFSAAPSASHASASATSAPTAAAEPADKTNTTALGVGLGVGIPLAALLAAAVFFLLRRRKNRDAYQPPSEMAADEYALDSRSPSTKYAYMAEAEVEAGRDAPVAQELSGERNEKLIELPASTPSTAAGLQAVELESPLSSPTETTNRATPATKDVHT
KZM19774.1	>ST47_g9151	MSLRSVILATATLCAYVVDAHMIMAKPVPFSVDKIDNGPINKLQYPCKNTLGYTVSTMNSMAVGEEQTLSFKGSAVHGGGSCQLSITTDTEPSVSSKFKVIKSIEGGCPGVEGPVDFKFTLPDSIPNGKATFAWTWFAKLSGGPEMYMNCAPIEVTGGASDTTKFDALPDMLVANIESTTCESVTSEALKFPNPGTVLAQGDNGSDVKPPKGDCGTTGTSPEPSSGAGTPASSSAAAGGQASAAPSSAGGNDGMYTPPAGAATSAAATSAAATAAPSAAVSAPAAGSAAPSAAPSAAPSAATSKAAVTSAAASGGAGGVFAPGASSAAPAASTQTTLVTVTGTPAAPVKSTAAASAPAASAPAAGTGTTPATPTTAPAAGGDGACTTEGAIVCNGTTQF…
KZM19780.1	>ST47_g9158	MLFRLGTFVAALSLQTTFAAPTMENHVEDIQCRCLAFRTNERPTLCNLFEPRDFGWRSAQTLASQYDIKVQFASESTLSRVLSATTPLPSDVLQTTSYGDAQSESKEGNISQNKIVCGFGKEVRHMTQHYRHHEPESHFVGRVLGWLMLFIALYSSRDRTIKLNGEEKPLKASSNSNNDSS
KZM19812.1	>ST47_g9176	MRSAIVGLVMAGLSAQVLSSPLEQATTLFSTPTPAPTCTLPILKQPSFKKICTKYGKTLTFTSYTNCGGCSLETKHLGFGLPCQTVTYNPGNTAEIVTSCKPSLTTTKRSTFHVRPTGECTCLALRLPYSGQGREVPANGNMGLHLR
KZM19818.1	>ST47_g8934	MRTTSLLTTFLLTTAALAAPTRTQSPTHCRCLLVSDALHPLETPSAAHWTPANWKPTDPTPSASPYHQTPDQCENLGPELENFRHAKPDLYESYVRDKISTTSYPTTHSDTEMPLSTQVLMNRVSRPTSHANERIVCYAEPETFSAYNDSCLTLWALQIIVAATILACVAEAIHLGMRWFFGTASSSPDCEESHMSSQKALRLPGAERLLLAIPTRASEKDDIFSPGADKKTKAYEATRYFVVKSSSGRREFIAYDSEDDDEANRPVM
KZM19824.1	>ST47_g9163	MAAQHLKALALLLSFQIIGVFSTFTNLPDVPPGDFNVSTRIEIRSTKHAAWEALTDFARYPEWNPFVRASIMVSSDNITLPDQYPREGRRLFLRTQIPPLPIPVDKDTPDVELHTQYSYENVTHVQRGRGRLAWASNDSSIQAERWSAVSNLGRGRMLYESREVFNGALVKDLATQLGKALQAGFDAQGQALKLLLEECDRD
KZM19827.1	>ST47_g9148	MFIFFFSLFLTTLLNALPGNAAPFVAEKRAIDTNLLQTFRLMSQYSSAAYCSSNFNSTGDQIQCESGNCPLVEQADSATVLEYSRAETSTDVTGFVAIDHTNKAIVLSFRGSLSIDNWLTNLDFDLVKTDICPDCTAHSGFWNSWVDARGTVLPAVKAASERYPAYQISVTGHSLGGAIAPFAAAQLRNQGFSTSLYTFGSPRIGGRKLSAYISNQAGGNYRVTHRNDPVPRLPMLLMGYVHISPEYYIDKKSRVAITENDFQVYNGAVNWKGNNAWLITSIEAHRWYFTKMYLCGDLTITIDVDALAGVDVVAKF
KZM19873.1	>ST47_g8960	MRTSILAFGAFAGLASANINFSWVNPTCDINAPSRCLTGQHCGEDNMCVADIKSDHSKISSSHLQIVPEKRQTKYSQDGQCGPANGNLLCDPKSTVYSGSCCSQYGWCGNTEGHCGTGCLSGCENTPPGPGVPKAAAVPARDDGRCGKDFGGATCDANGAYGGCCSSYGYCGSTDGHCLVADGCQNGCKDATTVKPTVPTATATRPPSITTSGEPVIGKPSSVGVTPVTPTHVQTLDGSCGATFGDTVCGTWAQGSCCSMYGYCGNTTAHCGEGCQSGPCVNTPAVPAPKASPAPAAAKPGSIVIKGRSGVPAMHAGLMPNGKVVFLDKVENYTELKLANGQYAYSSEYDPVTQKLTPLAYKTNAFCSGGIFLADGRFVSLGGNAPLDFIDPTVGDGFK…
KZM19878.1	>ST47_g8945	MVRLTNIAAGLSLASVALSSPLQGQLYTGQNASTPCAQVSASVAAQKTVATPTVAARLAYECITSVPFNQTAALALVDGVVPYFKWQSNTAFVKDPPEECAEKVQPAVDIWGGLEKIRGKVVGGQYENEFEFGFELYILIQSAHDGHFVYVPDVVGTVFNFARPVPLVSVSADGKELPKAYVYADVLAELFGNSTFTSSPISKINGEDAQAFLENWAQYGSLQDRDALYNNVFYELATVSLGPSGSGVGTFAGSGRGRLIYPGATTELEFENGTSVTYDNYAKVLIPFTGITDGESLYKTWFTGNQPTAATPTPSPSSKPIPAPGYPPPVLREAHNLIGGYYLEDDYADVAVLSLPSFVGINTSEAFQDTAAKFLAAAKAAGKKKLVVDVSANAGGTIL…
KZM19886.1	>ST47_g9011	MLRPATPLSILFFVAFCLLLLSTLSTPVIPAIPLATYRGTNFGVLGYCPNGGSCKGPMIGYDTETLFQDQPDTDFSLPAASRHALSSILIVHPVAAFMTLICFGLAIAAHFHSPAHSPRYLLALLIFTFPTLLVSLLAFLVDILLFVPHVAWGGWIVLAATIIIVASGIVTCAMRRTLVSRKARKRRIAENDDMNGQTYYANRPSDARVTTEFPKAESPPPMSNDTMSSGIKDNEYASFELQKQHSPEDMTPLNQRNPSLKTNSSAGRDGSDPMVAPMRGPSGRGRQPVDQYGNPIPPMPQDQYMMNAGPGGQRGRGGPMRGRGGPPPRGAPYGVPGRGGFGGPRGGMRGPPPPGWQGGRGGMRGGPGGMGPGPMGRGAPPPGYNNYSQAPYGQGPPPR…
KZM19892.1	>ST47_g9019	MALLQCLLSTLLALSVTEAYKLDKKFDAYNFFTSFDFINTHDKYTGGCASYVSKDEAISTGLAKIIGSQTYLGVDNNSVVDVTPQGGRKSVRLESHHTIDNGIIIADFEHLPASACGMWPAFWLSHDDEHDGDVYSEIDIVESVSYLPRNEITLLTNPSQCTMTAQSGTGFVLSTNCDYDTGGCGVTAPYGTFGDSFNRNGGGVWATQIEAGGIKIWYFAESAIPADIKSDSPDPSKWGMPVMCFVPQNCDIGNAWKKMKIIINITFCGESAGGAAWNGYTQCRARTGFASCNDYVAKTPSAFDDVYFLINSIKTYHD
KZM19898.1	>ST47_g9035	MLFSKSAVALLAFVPAIAASPLHLRAENSTKPVVALDYVTLQGATSSTYYLTYYRRIPFGASTAGPNRFRAPQPPVPITNGTYDTDRGFDMCPQRTVNGSEDCLYLGVYSRPWQPTRKLRPVLLTFYGGGFIRGSAEFSIPPSGYPVLNVSESNDYVVVYSNYRTNVFGFLPGKKVAQSKEVDLNTGLLDQQAALQWIQKYIHHFGGSKDDVTIWGQSAGGGSVVAQTIATGNRGKKLFHKAMSSSPFWPKTYRYDSPENEALYQQVVTDVGCANSTDEIACLKTADLQALRDSAFRLSTSLQYTTSSFTFGPIIDDSFLTSPLSEVVRKGRLNAPTVLTSYNLHEGENFVPPGFQNAKTASDGFNSSTASFDAWLTGFLPGLREKDVLQAKTLYPTSG…
KZM19907.1	>ST47_g9202	MSLTRSIATLPLLWLYATAIPAGTGRWSNGTSSAVNGGDLNATAYGLIDTYDGTNWLSMFDVQAIADPTHGFVEYVNAQQAQQLGLLRTQGSKVYMGVDSTSILSPNGTGRKSIRVHSKRAYNQALVIADFAHVPGSNCGSWPAFWMFGPNWPNQGEIDIYEGVHLNTYNQATLHTSPGCVPSVGPGGETGHRVGNADCGADGGFGGCGVESNISTSYGTAFNANGGGVYATLWTNTGFKVWYFANRHVPSNIRDGNPDPSSWGTPSANFGPGCDYAAKFRDLNIVFDITFCGDWAGGVWGQTSCAQVNSSCSAYVASQPQSFADSYWLINSVKVYSV
KZM19919.1	>ST47_g9055	MKLTTTLAVALAADAASAAALQARHYLFPALTGTADCTTATQSVAAGSSVSFKVTPNIFHQGPLQFYMARVPTGKTAATWDGSGNVWFKIYTEKANVANGALTWASMNAATASVTIPKATPSGEYLLRVEHIALHTASAINGAQIYLSCAQIKVTGGGSGTPGPLVAFPGAYTAGEKGLQVNIYGGQTSYTAPGPAVWTG
KZM19920.1	>ST47_g9052	MFFSTVLIATLAIIPSALAQFNGHYTIKAIDGTSLAFGSQSKVFSIGNAPTKNGTFYITSGPKSLGYAFITGVLPSNVLTATGSYTSTNNLDNSQASGLDFYSSTGNRSQQAWKINSLGNGLYEIESAAFPESVLDIRGDGSNTRQVLVYSRNGGSNQKFRIIPFSLFDTAT
KZM19922.1	>ST47_g9050	MTSNYSFYSIPVYWFLALVPHAYAVSVAKKANKGFWDNTNPRRTGYLEKNIPKDVFAKYERAEAAHANGLENAPFFIGAVLAGNFAGLDTFTMNSYTGVYVGLRALYSVLYIKTTTLKNSRARSMVWIAGLLTLFTLYIKAANKVLADS
KZM19923.1	>ST47_g9051	MQLMFKTISLVALVFWFCGFVAALPPTSSYNYTFDELRPQPGSQGSFRQPYFRFKIFFRKNTSITEKFLHSHWKTVHADLTISDPDAGVRLLRYTQFHQDEEHRKMIQPLIHATHGRLAVSPYDGVAEFLTKDYGTFEKFLMQIFINPVMVADQQSFADDSTAMHVMAGYDNLIFGDAIDALNGANGILPSDPRLVHT
KZM19933.1	>ST47_g8917	MHFSSLLVAAVAVLPTAVFGQLSGKVGPLTTHAAKTAKKTCNVLKYGGKADKSTDLGPALLSAFAACKTGGTVVVPSGDYAMKTWATFEGGKAWALQLDGVIYRTGTDAGNMLFIRNANDFEMFSSTGKGAVQGLGYEDHKNGKRNGARLLRVEKTNNFSVHDIILVDAPMFHFVMNTVTNGEAYNMAIRGGDWGGLDGVDIVGTNVWVHDIMVTNKDECVTVKSPSTNLLIENIYCNWSGGCGMGSLGADTAISKIQYKNIYTWKSNQMMMIKANGGSGYVEDVLFENFSGHGNAYAFNIDQYWASMSAIAGNGVQLSNITAKNWRGTQANGAQRGPVKVVCADTAPCTDINVSDINMWTETGNKNINLCRSGHGSGACLKSGTGAYAQITQTVTTAP…
KZM19948.1	>ST47_g8929	MPPRSLLVFATVLFAQSTTAFNCSTKPIYVDIHKRAVHDSPVFQYGSFIGVGTGETASATSAQNHSLWPSLSQNHVSFGALGYCQKSALRDCDVSTGGFYSNNQSMTFIEYKDFKTLDADSNNTLEGYFGQDTLRLYTHFFETDGASQTLLLNSTIEVATAGAIVPGRVGMGPSSTLLQDLAGREMIAGKTYSLYIGQGFERAGGKVNGSNVFGGYDSGRFTGTPHQYPMNINNVNAMSVRIKDVVITETGSGVNQSLFDPKMFTDMKSRPETFEAQITTEQFPLSLPYQITQNLVKALAAQKDNYWGDNSLKLTKDFNGTLSIILEDGFTITFPPEVLRNASNVTPIQNRDEKDDSPFLLGSAFLGQVYLMADYDSNNFFLAEAVQKNNMVMPVTFCP…
KZM19950.1	>ST47_g8923	MYTKTLAVALALTSVISAGPLNRRQDPCQDTYKSCVASGVPQVACACDLQSCLGEDNARGREYCASATATIVRSSTVATPSATSCDPEPTSTQATPVATSIPGGCNPAHPGSCPSSYFSTAVATPVATSIPGGCNPAHPGSCPSSYFSTAVATPVATSIPGGCNPAHPGSCPTPSAVPVSSGSNPVKSDKTWAVNNLSRYCGEDNSGCDYNFVIEADGKTERCTVIRMPGKDAATESWSNQPCTSGSPYTVSWGYTAQPAPAFAVMTVVNGKELAWFGVSDINGQKVTPSNPFGSGQYANLTAPVFTYN
KZM19953.1	>ST47_g8924	MHFASSLLIAALAGLVQAQSVTPSGFTPIASSKLDVFFNTTMVMTPGQVLSKAETATQPKIAVANTISNMSATYMFVMLDLDVPPEGGSAKRRVLLHAMNTGFKATQQKVGGSATLLASTEQGPAAYIPPGPPPTDTIPHRYVELLFQQPADLKVQASDFTSVSDRINFDINAFMVKNKVSPPIAGNFFMVDGRASGTAQGTASASGSGGLPRSSVQPFTGAAEKFRLSPAMAGLLGGLALFAV
KZM19958.1	>ST47_g8901	MFKILLLLGLWTLTATAQFGFFDQMFGNGGGQQQQQQQQANVRSDSSWYQAQYENAQCSHYLCPGTLSCVHFPHHCPCAWEANEDKVELGDGIAICGSKGGWKEGEFAKKVELARKGLL
KZM19969.1	>ST47_g8894	MKITTFFKAASLLSSLFASSVDAQAATYTHAKTGITFYKQTIPEAQTKGGFEWGYALPAAAGGNNDEYIGYIKGPLNAGKQGYSGISHVGAMPNSLLLVAWAEGTAVKTAFTFAAAYSQPVKYTGNATLTQLNATVTDTSFELVYRCQWCWVWNQGGATGSQLPTGEVQVIGWAQHSKAYDPAAIVQHDNGQSIFGISVAPARNAKYSDWVNLPPVGGGATPTPSSTPSSTAVGPAACTGSAAPKDSYDYIIVGGGAGGIPVADKLSEAGKKVLLIEKGPPSLGRFGGTMGPAWLKGTGLTRFDVPGLCNQIWVDSAGVACTDTDQMAGCVLGGGAAVNAALWWKPNSIDWDLSFPNGWKAGDMSAAVGRVFQRIVGTDKPSSDGKLYKQEGYDVLSGA…
KZM19972.1	>ST47_g8884	MSIKSFVIGLAALSVVSAAPVAQWDDTHAPAIVGGVPAVAGDFPFIVSLQKNGAHFCGGSLLDSKTVLTAAHCADGQSTTNLTIRAGSLNRTSGGVTSKVSSLHVHPDFDYDLLSYDVAILKLHTAIPQSSTIKYATLAAAGSEPAANTVATVAGWGTTLSSGSSLPVALLKVDVPIVSRAECAADYLKDSPPKNVTDTMICAALDTGGKDSCQGDSGGPLVNASNGTLIGTVSWGTGCALAGFPGVYAHIGALRSYIDKF
KZM19977.1	>ST47_g8835	MKFTNFALLAPLVAVSPLEIRHASVPRNAEVSYDGYHIYRVAPSSANEARELANRFSRYHTHPIRDTLSVAIPPDEVLSFESLALKTRLVNSDLGAHIRSIDSKPATYDRALHKRGELPDLAWYDSYHPYAEHLDYWDDLTHSFPKNSKKFSLGRSYENRTIYAYHLFGDKNKGGYGPKTKDKREKPVILWHATVHAREWISTMVIEYLAYQLIDGYKSGNANVTAFLDHYDFYLVPFHNPDGFVYTQTNDRLWRKNRQPRPSVNTTCVGTDGNRNWKFEWDAEPPEGGSTPDPCGQTYRGLAPGDTRENAALDALSAKLSKQGEGIRSFIDFHSYSQLVLTPWGYSCDPLPATIDRMLEVANGTARAIEAASERNSTYQAGPGCQILYFSTGNSRDHH…
KZM19978.1	>ST47_g8834	MRAFNVIAAALLARVAEASSLKPPILPLIVRNPYLSTWLQNAREEPWSKWPMFWTGDEIGFGVLASVPDTDNVYPLLGRPHDSLEQSSEHYTVAFPIYKGAKYDASTTNLTYTIPAPPKLASAGDVEITLSFLSPITPTSTLRQSIPAAYLSIYVHGSFDVNIYVDVNGQWVSGKRDSPIEWGLTEREAAGSAKGLKTWRVKRQVEQIFTEEHDQAEWGQLHFTGPSDARHESGTSALLRQRFAKTGTLQDQVDDNFCSIMDEEPVFAFSKSFKLNNASSMSSKPTEQSVLFTITHIQDPVTQYASARGLTFMKPLWSSWFPEDNKLIQFHYGDFANANSLASNYSEQLRVDAYQSGSTNYVDIVALSARQAMGATSFSGTPENPLLFLKEISSNGNSQ…
KZM19999.1	>ST47_g8883	MRSLSTTLLAFATLADAHYNFERLIVNGKTTDPYEYVRAVGPMVGNSPFYDVKHNDIRCNNGSFAAASKTKTYLVKAGDTLGFTIRDVLGHPGPLFAYMSKSTVANVSAYQGEGDWFKIYEMGVKTYANYSLAMTWLSDGWKTFDFLIPKDIENGQYLLRAEHIAIHSAGGPEGAGAQFYIGCAQIEVSGATGKKPSPVGKFPGIYNPRDPGIYFSPYWPPIVNYTMPGLKVYPEGGSFPAFIADPAKPVATQPLPASFAGAKPTPVIVA
KZM20000.1	>ST47_g8880	MRSHSWFVALAALVTTSYAWPELPHFELQQVDHANAASTQRSVQGTCKRIAALTNLSNMAANQTNLDAMLASQKLTQDEIDYIKTKIDAINSELQKLNSNTTLAAECGVANAHRKAAQDCKKLDKLEKLVELANNKTAYDEHLAGEVLNQKQTEQLKQNMEDAELKLQALRSNSTLVNMCTNEVGLRQNGAVGQQAGDIGEAAVDNSGVISLSTSDATTFCGAYSTSSRNDTEAVHHPIKPSDYGPTYDEDAKHLQYKALLYVHGVATGNTAFTVRIHLYWKLLWDCVMDENAIRTPMNALPYMSAFWNDCIEF
KZM20002.1	>ST47_g8826	MKFTNNLAVAFLALSGVEALSIPLRSSVNAISKTYHSTPVRRQLEIGGLTLGGPDGGISGGGLKLGGKGGKGGKDGAAAAGGKPAEGGAAGNGTMTAGAREPKKGGAGAAGNGTMTAEPAAAKESPAPKDSEPAPAGEGAAKEPATGKEPAAGKEPAAGKEPAASKEPAAGKEPAPGKEPAAGEESAAPKAAEEGAAAKEPTGDKPAAAEETPAPKPASSGGAGTESQPGRAEGDAARAEAEAEAATAKGEKPKGEKPKGEKPAAGGENADGVKATQEAEQFSEEAGITLGKDGGAQNLGGDLGITKGTDGSTSVGGKSGINVAADGTAKLKGNE
KZM20010.1	>ST47_g8847	MRARLLAWGASCATSQFSWPWGALASSPERGEPANFRVSQQLVVRAFDALYMLLDALYRLLDALYRLVGTRRAEDRKASFPRFDRLSGTATPTGRALLPHHGPVKRHAGRGKRQNGAPLSAVQQAPRAPPCIESKLPHSIRFFPNLLLEAEEQLNSIDPATPQEATQNNGNMAPAAVLMVGTGEYTTGFVGGGASKSDKKVGVVGLTLFDLRRRGKVGNLSMVGVSGGKFPAIREHLQKNISEAYNGLDVSFDEFPKEGKTDPDAYKTAIDALPKGSAITIFTPDTTHYPIALYAIERGIHVLITKPAVKLLEHHQELLAKAKEHNVFVYIEHHKRYDPAYADARFRAQKLGDFNYFYSYMSQPKSQLETFKAWAGKDSDISYYLNSHHIDINESMVPD…
KZM20040.1	>ST47_g8807	MLRLFGAAALLGAAFAQNSSAALPTVDLGYEIYRAATFNSTGGFYNFSNIRYAAPPVGDLRFAPPQAPAENRSAINTGSISRICPQAGPAWSAQATQFLTSVILGTSYNTSTNYVPSGANSSSPVPAADPSESEDCLFLDVFVPEDVLAKAGKGYGAPVLVWIYGGGYTGGNKNNNPAGLIAASGNSTNGDVIYVSLNYRLGALGWQAGPSFQAEGGTSNLGLYDQRFALEWVQQYIHLFGGDKNRVTVFGESAGGGSIIHQITAYGGLKGKAPFQQAIPQSPGWQPVQSNVQLEDTYRKFLNLTNTTSLAELRALPSEVVMRANAQQVAYDTAWGQFAYGPSVDGNFVPLQPGQLLAQGRFDKDVNVMVGHNANEGPLFTAPSIQSDAALRRQLNTAY…
KZM20068.1	>ST47_g8755	MMRQAWLFAALFALVAMASAFNLEGLHIDGINEYLHHNEKRQASGTGASSTPAASSAAPASSSAAPPTSSAAPPASSAAPPASSAAPAPTSDEPATSDAPAPTSAAATSNNNNDNTNGGGSSAAPTSTAPVPSSETQAAGSATRTSAAASSSVRTTPLVRTTPLVATSVQIYTTIYSTVINGQASQVTSTGSSTHVTTTGEALVTDPPTANGSSTGGSSGLSDSNKKVIGGVVGGVGGALLLGGIALVFWRMKKRQSRVTEDDDDLMAGTGAALGDKPANTGASPFQSNLEQYHNPGGRPNAAANF
KZM20069.1	>ST47_g8749	MAALLLAMAMRIAVFAALLAVAEAVPQISYPLNSQFPPIARVSEQYVFQFASTTFKSDTGSLSYSLNENPSWLSIDGKTGTLSGTPKVSDVGTMSFTVTAAGSAGAVANMESTLIVSKTDGPQLNTNISQALSAAGSLSGPTTISARPSQIFDITFPSDTFDSDNKLSYFATLSDHTPLPAWIGFDTSSLRFSGTTPPTSKPQSFGILLIASDTPGYASATVQFTLAISTHELYFQPAFQTLNVTKGGNVHVTDLKNKLYLDQSSISDRDIQSPSAELPSWLKFDGNSFDLTGTAPAELSSQDLTVTAMDIYGDLAEYTIHLNVISELFSGTVDALNITLGELFKVQLPRSILAKDDEVVTVDFSSLTDHMHFDPITFTIFGTVPEDMSPQVVQCSMTA…
KZM20083.1	>ST47_g8740	MQTLSLFLLSASAVSAYPWVANQPGVDSSMLGRARNVKRQNSCPFNANHQPAAPYDSKYPYTGARNGAPGTGKGGIKVPADGDTAHAFVAPANHNFLAHDGVTTFNELVDAQQNMYNVGWDLATLLATLGVLADGDLVSGKLSIGCDATSRTATLGGVLGTQPGLNGHNKFEGDSSLTRNDYFTHNGDNYSFNGTLFARMKDVADRVSGGNFDRNTLAAYRSQRYDESVQENDNFFFGPLALLLYGASSFLYELFPSYGNEGTPDLKTISSFFGTTADSSAPGGWKYTAERIPDNWFNRRAPYTNNDVTIEILSQYVQYPKLFGGNVGKNNFDALSTPFGIIRDGKLPDAATASDILCLLYQLGTQPVPSSLSVLTDIPLTLLNLSIGKLNPVFKNAGC…
KZM20092.1	>ST47_g8786	MNAALHGWQVIFLFLGPLTPAVGISFWFIMPDIISPQTFQSKDAPRYLPAKISIVILNKQRDEEKSAKGGE
KZM20099.1	>ST47_g8742	MWKPTVLLAAALAVPAQALHFFIDGAVQKCFFEELPKDTLVVGHYHAEVWDDATKSFQSKPDVGVFITVEETFDNNHRIVAQRGAGKGKFTFSAADSGQHRICVTPQNVQSGGWLGSGIHGSVKFTLDMAIGETSRIESTDKAHVQTLVEKVQDLNSRLQDVRREQIFQREREAEFRDQSESTNSRVVRWTLIQLAILGVTCAWQLTHLRAFFVKQKLV
KZM20102.1	>ST47_g8801	MKFISALVGAALLTQQSAAHPDDSPEEHAREIAQRNAYLSTHKRSLAHCAEALKARGNDLAMAHRRSLEVKKMRAKRAIDQEKNYLRARDLDTVLATSHASNRTGITADTDPSVIFAGNNSCILTPEVTSGPYWVKGEMIREDITEDQKGVPLHLDIQVIDVNTCEPIPSVYLEIWNCNATGIYSGVVSSRNGDGSDESNLDKTFLRGISQTDECGVVQFDTLFPGHYTNRATHIHIMTHTLDATVNDNNTLAGSSLSHVGQMFFDQDLIEAVDTIEPYASNTQVIKENYKDTYLKEMASEVDPMVEYVFLGDDISEGIFGWLSFGMDSSASYNVTPAAYLYADVHDAAPCDATDLAIGCTLTTIVSSAIVSSAVASSSVAVSSVVVSPSLAASAAPSA…
KZM20103.1	>ST47_g8756	MHLLPPSLLLFCHLALSTGSPSPPLLTSDYAISLAPRNTLFFRQLTDLQTFDAALGGVRASSITNSGVPDRPFAVDGNYFSDFQSAAQRSCDEQFQGCQLLANGQGQDGQGKGKGKGKGKGGAGPLTVDMCNQQKEKCTAAQQQARVQDFKTGVPSTNIGPDPLFSDFDLICER
KZM20135.1	>ST47_g8707	MLTITSKMIIAAVALQLATTNAFPTPMGSSPSDNTDLIAQLLTTPTQIKRYRKLLTDSTGNKLLDNDRLTNATIWDFLQNSNAVPGGQGGSTSSANLETFPFLINSGVTMTMGTLGPCGIFLPHIHPRANEFFVVSEGEVDFGTLLELGLFENLTPNPEVGGKLGKNMGTLFPMGSVHYQLNNSPGCKPATIYTVLTSEDAGSTPVLMDPVPGNATVGRVKRVDAGNFESVRAVTPSHIARIVDECLARCYD
KZM20136.1	>ST47_g8706	MRTPALLSLAVLSRHALTQRLQYDERTTKDCIGWADIYDSSVDTCESTLREWGVEPKRFHAWNPAVGLDCTPWFNLTSYCILTNETIEDSVYYTTLSLSDYSHGMPLASMTTDSDGWRIPVTKSDAKSHTTSTIAPIPSPSTWKDMGCYVDNWNDGENGIRTWILDTRWLPRDPEETVDKCKEKCHKMQYKIAGLKLGDECWCGDSNNGTLAADQKECNMPCGGDAKVMCGGTLRQNVFGAVDDIDESSSASVSTAVTASATNGGSAATGPTATATSGARRNLGLFGMWRR
KZM20148.1	>ST47_g8724	MLSKVAFINALISAVSAGTTLWDGRFNDMTSSADLEKWSFSNPVGAYQYYIHGSGAVTDYVNLDATYKNPADTGSKQGVKITIDETAKWNGQTMLRTELIPQTTAAINKGKVYYHFSIKTAGTNKPTATNEHQIAFFESHFTELKYGASGSSNTNLQWHVGGVSKWDVELVADEWHNVAYEIDFDAGSVSFYHSTGSEALAKTAGPFDASTSSNGADWHLGVLRLPGSNDAAGAEDWFFSGVYIESGDLTTSVNTAGGAASGDSSAPASSAAPTSSKAAVASSAAATSAAATSAAAETPVVSSAAAVSSATKTPVASSAAASSATAVESKPPVASSTAAAPSAPAEPGAGTDLPTEFTLKELIAWVKAKNGEN
KZM20150.1	>ST47_g8722	MVSYLAAAVALLSATASARLSRHRSIPCGAKSTISYTLVSGDTLGSLATRFNSGICDIAKLNKITNPNSVPAGAVLTIPQGCTDPDNSSCLAPVSTPTNTCVFGVGSSYNVRGGDTLTSIANDFNITLAGLESANPGVTNPDLIQIGQLLNVTVCPGSSCEWIGTYTIKQGDTFVDLAVKFGTTTGQIESVNANVNPLFLQIGSVIVLPEDCEAGKS
KZM20181.1	>ST47_g8639	MRQSIAILTFLASAALADDVLSFIFPGGYDGVAPVATVESVNPSTTSALVTCPTGTAADECGWGNGLNVQIISGTRYEAVMSAASLYVSYGCDYNSVATQMTCTAETSDQDAQTAILSGSDVAFITASVVEGAEKLSGASATGSASASASASASGSAAPTSSGSAAASSALRTSIASASGTAAAGSHASGPPSATASSSAPQSTGAAARFGIEGTALLALAGAAALNVL
KZM20188.1	>ST47_g8641	MKYTIFVGAVTAFAAAQTITDLPPCSLECLAGAIGGLGCGLTDFACSCQKASQLTPVVTPCVQNACTDPADQSKIIEVLSKICAAAGFPIEAPAAPASSPVVEPTPAAPSEAPIETQPSATEEPGYPEYPTASEVSSEYPEPTHITDDVPNLPTSYADLVSLPSVIDTIIVSRPSSKPTSVPGVLPPYPTGTPVPAPSGTGSSSTTSSQLPEFTGGVRLVKAPIVAAGIFGLAAFVV
KZM20192.1	>ST47_g8645	MTPAAHSVALLAFGACVAAQTVTITATVTAAATPTITAVSDCHPHGTVNWCMVGTEEYQISGPTATEEFQAQYTDCHKHGSDTYCVDDAGEDVEIVMENTEETTHAGETAEEPAGSEEHCHFHAGVEHCVGGSEEVSCDATDRDYNIPLRVGLLFVILVTSGFGVFLPILTTRFNIISQTNIIFVVLKQFGTGIVLSTAFIHLFTHAGLMFGNECLGELQYEGTAAAVFLAGLFLSFLADYLGARFIQWRQKKHAGSDSEIRGSPTDGSDKAVSASTSPENEFNRSDGLPHAHGAIHNTTPMEEKINVYNLEAGIIFHSIIIGVTLVVAGDSFFITLFVVILFHQMFEGIALGTCIAELPKAAASTLQKCIMAGTFAFITPIGMAIGIGVLNSFNGNDP…
KZM20193.1	>ST47_g8646	MARFTSLMLLGAATISASPLAARQATTVTVTATAEAPASTAWDAGAVHDYPIHASCNATQHQYIKNGLEETLTICRQARDHILRWGNSSEIYQKYFGNAPTGEPIGWFTKIVDGDKSDVLFRCDNIDGNCGQEGWAGHWRGSNATSETVICDLSYELRRPLEGMCMFNYDVANGATNFYWASDLLHRLLHIPKVGEGIVEHYGGADEYPGVLELAKSNPAEAVRNSDTLQYFALEVYAHDVAVPGVGCPGHYREVSSSDSHAAPTSSASAAASSVAASATAAASSASQAASSAAASATQAAEACTPHDDHWHCPPGVPEPTSPPS
KZM20199.1	>ST47_g8661	MTHMLVLLASTIFFTTLATTVAAMSVTYDISYSTASALTLDVVVFRLLELFSLFVRGFFDFLQHNLLMPRWAFFMLVIAFVLRSAPPHVVGKLGDALVAPTKSFVHILRLYLDHRQEANTTIITLQKRVADLEEGAILSEKLKRNMIKREIFDSTLAFYDGMIAELQMNTTRLECRLKTSRNANIALQKDYDAALYKNTLLRSVCTAKKQRANEASHKAEMVRMNQVVVDCTTQIIELESKISSLKTRHSNEGRDRLAYHKAQREFQGLLNARDITIDLRNANINSLEIEVQSKNTTIHQLEKQVIMFNNLKKLLLCLVETGDQRQQIAVVICVAYFLSCGIDVTELGIDPLQLQTYSDWATMVINNCPSPLAPTEGLRLKGIRYTLSRSFVRDGQTFA…
KZM20204.1	>ST47_g8670	MHFSARVVTGLVAFIAITILYTINAVSARDPTSFFFNPRKGYAARYSAIRRQQAEDFLQAYHDAPSHEIVKAGHERNRKLCVGIPSFKREGVHYLRDTVGSLLEGLTPEERQEMYLIVFIPHSNPNVHPEYNEAWLPGLADQVLTYEFGDDQMQHIRNMERQGGLYVEKALFDYRYLLSACTEQFTPYIAMVEDDVVAMDGWYHRTMAAISEAEQQAAERHARADFLYLRLFYTEEFLGWNAEDWRTYLYYSLWVASIPTAILLFVRCARPTTKLSLTITTPRSVATIYAVTGASILIFFGMGRNTVLPLPTGVAEMSEFGCCAQSFVFPHLKALALVDYFKDRRLGFVDVLTEDYANERGELRYAMTPGVMQHIGKKSSKIDDYGPQSKWGRSVAEKI…
KZM20207.1	>ST47_g8679	MKLLNLVSGLLCASSALAFKRPTKHSLPRSVVEKRVANQPFSHPEIQKRASRFLTNKTEAFAVNGSGIPEVPFDIGESYAGLLPISDSPDETRKLFFWFFPSTAEQTPEHVTIWLNGGPGCSSLSGFLTENGPFTWEAGTLAPVQNPYAWTNLTNMLWVEQPVGVGYSQGIPNITNEVELAAEFRGFYKSFVDTFQTKHWKTYITGESYAGFYVPYIADGFISANDTEYFNLAGISINDPIIGDSTIQQQVVILPFAELWQNLFYLNETFLEQVRDLQVHCNYSSYLDTYFKFPPPQGPFPLLPNPYTQAGECDMFDTFTDAISEINPCFNIYHVTETCPHPYSQLGIVNGGDYSPPGAVIYFNRTDVKEALHAPVDTNWQQCTDKNVFGNGDIFSYAS…
KZM20237.1	>ST47_g8585	MHITNPILAIVAAASLTRALPSSSTPPKSNPIKSQDIVATLAGTYTLVNTSSTLNDVPVPDAAYGAAPVGILTYSKSGYMSATITATEPQLQPNLTFPFQASDLDSDWALIGKHSIGYAGPFRVNEALPANKTSGQVFHGPLVVANVPTWVGTEQKRNYTVVREGRDTLLRIGSERGGGHKGVLWWKRID
KZM20241.1	>ST47_g8580	MPPKLQFSDIWLPCLLLLVFWARPTQAFGAGNIASMSAVEGQNWRHGDIEDTLLTLLISSRTGKKFSKMDVKRVYFGNWLRDYSQAVDVGTVKMVSAEAIRILLWVLGFLSFGYGTKEFEVTRDRLGCYRPEEHIDNPKDYADNLDARDYDRRLRGPVDERRELSVDERTGLKNYIASEDLGITTSAGMVRDLLRRCIDLGRRSGGRGPDFYEALRLLGTATHCLEDYSAHSNYTELALIEMGERDIFPHVGRNTLVQVHEARKEVYPIVTGTFGGVDFLHSVCGEISDKTTQSELQELEGAITNADRTKNKSKIKDLLSQLPDGIFGGKDQSGKADELEQNANAAAMGNLHVTPKEPEAFTEQVGEMVKQIYPIMEFHDEIMQAINEFVEQIPVLPEL…
KZM20250.1	>ST47_g8621	MKANFLALGLFGLAGASAVLPRDYPTKPDNGYPSKPTKPVYHDSYPTKVPAKRPTKPAYPTDEQDFEDGYSYKNSKGSTSSWKPKSKSPEFFNIRVDEKCDVVDGVAEAPADCPFNGYAIRLEGGIFIATPYNNYFDPKLPTFFVDDDTQLYTVSKDPLQVYIDGITGALKYTKIGWLPPNAIAISFYHTGNNPLGLVDPSPSYLSWPSTQGSSFFGSPWVLCPLGSTQQYQVFINSENFGIGGPAGVAKDPGSCVSRNLAAVNANPWKQTSPAPYYPPAPAGYAGDY
KZM20260.1	>ST47_g8616	MGFASVSCQLLLAAASVSAKWIVPGARWRATDGTLVNAHAGGVTVDKETGKFFLFGEYKIEGQVEGGGVSVYSSDDLATWTPEGMALSPIEGHPYISTEHIIQRPKVTFSEQTGKYHMFWHADNSTYGWLLQGFAQADNITGPYSFVDATLPLGNWSQDYGLFVDRKDGRAYALYSNGDRREGRDVYLSSYNDNITALDKVVHRWDKYDLEAPTIIQTEKSYFALMSHKTGYRPNNVVAFRADKLEGPWSQPFIVAPLNTRTYNSQSGFSLRINGTKKTTYLYLGDQWDSISLWESRYIWLPVEIDEAKKSLEVKWHDVYDLDVKTGEVRAIKGKTYYGKDATLTGTAFKQEAAFGSHEIILTGIVGNDSKVTFSGIQGEGKPQWVSFYYQNTDDMGFG…
KZM20275.1	>ST47_g8594	MKFVWATLLSASIINASPAEQQPSSYSANTTPSDFSSTCASIASKLEVENGVVHFSEFVAAGTNLSLPENDVTCTKSFQLVTTDICRVALYVSTSDHSGFNMEAWLPSNWTGRYLSNGGLNGCIKYQDLAYTSGAGFAAAGTNNGHNGTAGLPFYRNADVVEDFAYRALYDGTLIGKQITKDFYGKAHDKSYYFGCSTGGRQGFKAAQDFSEEFDGIVAGAPAIAFNNLTSWSGSFFVAIGTNTSDTFVTRPQWATIHADILKQCDELDGYSDGILEYPPLCNYDPSGLLCTGSNTTSNGCLTAKQVQTVKTVLSPVYNDNGDLVYPRLQPGAEIAASGLLLSGVPFPYTTDWFRYAIYNDSTWNPSTLNTSDYDNAARINPSNIQTWKGDLSDAKKNT…
KZM20302.1	>ST47_g8442	MIFTNALALVLTLAPATLFAAPTKAIDSIALIFPRNGVSPRMIDQVDNASAKCDLSNAALPLEASGLPAVGSNLKLSHIAVGRGVQNYTCATAAATETPKAVGAVASLFNATCDGVRAPAVLASVTKIALGYAIPTNKLAEGRLSGHHEFTEKGIPFFKLQTDKVDFGSVHVNVTSKMVAPKDASTGSNGLGSVPWLKLVHLDGDYQEVYRINTAGGVAPKTCEGVQGSFSVEYAAEYWFYA
KZM20317.1	>ST47_g8461	MGALLSLPITLLNLLLPFTKPGTPVAQDLIHTAVLCGTLYYAPQIAEWYNTRQLGNTTDGLGQDTNHDQEQETQQNEPHDVRDVPQEPRPQTGQPGLQAHVEDEIEPAAPQPGPAEQHQQPQPNGAFELPEDAGPANERPRPTPQNRAVGAKKAKSLARKDQRRAYHEFHRQEAELRRLQAAEGAEERDAALAAEKARRAAAEAEIVERERREREERKREVERELEEEQERRERVVRSVRDAVDSAGCVDLVDVAWTEGKDRVWVERLVRASGVLGQLAKDGAKVLITSQGWLVRVDKDIMERVYADAEKFGEARGGKVGFNEFGGMLERAVRARARV
KZM20336.1	>ST47_g8428	MKVATSALLFGAASAAIPQQQVLKAPESFKGFDTSAWTKPLQNLEENLKSLTGEARAIWDEVAMMFPEQMEKAAFFSNPKPHTRKHDSEWDYIVKGADVQSVWVENENGEKEREVDGKLENYSLRAKHVDPSVLGVDKVKQYSGYLDDDEEDKHLFYWFFESRNDPKNDPVVLWLNGGPGCSSLTGLFMELGPASITKDQKIKHNDYSWNSNASVIFLDQPVNVGYSYSGGSVSNTVAAGKDVYALLTLFFKQFPEYSKQSFHISGESYAGHYIPVFASEILSHKNRNINLQSVLIGNGLTDGLTQYPYYRPMACGEGGWPAVLDESTCKSMDNALPRCTSLIENCYNSESVWSCVPASIYCNNAMIGPYQRTGQNVYDVRKPCGSNSLCYDELDWIQG…
KZM20340.1	>ST47_g8561	MYSNAISLLALAGAAQAHMSLWYPGPLGGVKEANKASTDSSVDPELNFPLGCCDSEGQPTAPSPGVCRGHLDLFDTEDAQVTWQPGQDAYFQLSDHTYTADAPGGTHYGGSCQVGFSTDRGETWKVAASYNGNCPLRGKDGSPEVQTFDFKVPTGMPEGKALFAWIWLNREHESFMNCAAVQIGEGSGNTTPTNPAKPSVSATKPNSPSSSAYQPTQPDENDQYSAAPPVPTSTRAAGYPSYPTASASPTQPGDEESTEEPSYDAPSEDSSEETDDSEDSDDSSDEEDSNNDNEESDNEETEDKWSGRPGRWNSHRHQTVKYKMIDEHKCKITLRSDRADASCVCKASSGCSPQKRGLTERKALRMARRDAIKKRADACAWNSAPSMVVSYYTVDAACA…
KZM20343.1	>ST47_g8562	MKVTIALMALMGAVSAAPFAEYKKHKHDPTTPAAHQRRLYPTSSDGQHYTAKSSEAGWYPPIPQTSSSSSSEDKHYTPYPTYSEGYPSSTPEPTSDYKPYPGYTPKPTSEDKPSTTPYHEVSTDYPHPSSKSSDYYPYPPKSSDYYPVPPKSSDYYPVPPKSTGYVPVPPPKPTTVYPPAPPKETSTPCPESSSQYYPHPPPPKTSDGMHYPPAPSSPGYYPIPPKSSDYHLVPPKSTGYVPVPPPKPTTVYPPAPPKETSTPCPESSSQYYPHPPPPKTSDGMHYPPAPSSPGYYPIPPKSSDYHLVPPKSTGYVPVPPPKPTTTPCPESSTYYTPVPPKSSAYYPPAPPKVTTTVYYNTTTPCPSDSRTPPPPPKPTTAYPVPPKPSSESKPAPAPP…
KZM20353.1	>ST47_g8540	MYFSKSFIVSALVGFAAAQSSASSQVISASETLASTASSTASAAGTSSTSSISGAGVITHTIQVGGPNGSLAFYPNNVKANAGDMIQFQFHPNNHSVVESTFDNPCVPIQNIMSNKTDAFFSGFMPNTTPLNSTSQLLTYTIRVPDDTPIWFYCSQGKHCQEGMVGAINAPASGDKTVQAFTALAAKASENLSPGQAAGSGSGTGTTSPSSGSSGSPTLGSGASGTSTPSPSQKTNAASVLSIQPFLGVGAAAMAALALW
KZM20359.1	>ST47_g8527	MRSTTLTSLLAALTLTTAQQINIDAAQSVPVPNLSIDLLAAPPAVTYDAASAALSIAAAAAAGESPAILKRQDNSTCTNRTLGAGPVPTTDTAPAFLSYAPFADFAKNATTPTNYTQAFSNLHASTTAKTYLGLAELSVYDTANCSAQCDAQTGCTAINLFFERSPTLNLASACPNPPSSTLIKCVFWGDAVTKANTVNSGFTEQGFVVAIAGSNGYNKGQAVQDAKKSGGARLEITALGLGLVGLIMAVGF
KZM20364.1	>ST47_g8507	MAISLAGFLLPVLLLISAARTATVKYDFDVAWTHANPDGQYDRPVIGINGQWPIPPIVANKGDQVIVNVNNSLGNESTSLHFHGLYMNGSTHMDGPVDVNQCAIPPGSSFTYNFTVDQPGTYWYHSHVRGQYPDGLRGPLIVHDPENPFKDQYDEEVVLTFSDWYHESMPKLMSGFISIANPSGAEPVPQAALVNETQNLTVKIEPGKTYMFRMINIGAFAAQYVWFEDHTMRVIEVDGIYMEPTDAEMLYVAAAQRYSVLVTAKNDTSSNFAFVGSMDEDLFDVVPDGLNPNVTGWLVYDDSKAKPEPKLIDSFDAQFDDFSLVPYDKEAIYSNVDQSITLDMKMGNLNDGANYAFFNDITYVAPKVPTLYTTLSTGANATNPLIYGDNTNSFVLAQN…
KZM20366.1	>ST47_g8505	MKFTLIAAALTATTAADFVVVTAIPTPTDLSQLLNLKSYASSLAGYVTAELASFTAGANPSAISEKAKIQKELASFAATASYSIPSGVTALTGLETFTTVPDWYSALPSDVKSYYDKNNAIVESILFQAVGVNQTGTASGSAGATRSGTGATASQTGAANKVAAMGAGMAAVFLGVVAL
KZM20368.1	>ST47_g8503	MKLTSFLIPALASIAAAAPDFAIGTQLTVTAKDGAQLASITSAYVKAMQSWQASVTAKPEWTSAYSALVDFQETGKNVPEGVTATDVILTYATTPDWYNAMPTDLKNYVEKNRQEQDAIRESILASVKGDAATARSLGIYLSGAMAALVAGVAIGL
KZM20372.1	>ST47_g8509	MPFSSRVVLLALAATTASAQYGPGGQYGPGESNSNGNGNNNYESSGSGRGDPSQSFIDGRQKMLIAHGVLASLAFVLLFPTGSILIRLGSSRGTWLIHGLFQLFAYLVYTAAAGIGIWLAGQAPAQVGLLHSYHPSIGLILFTLLFFQPIMGYIHHLKYKKHQRRTLWSYGHLWLGRIAITLGMINGGLGLLLAYDAPLGFAPSRGQVIAYGIVAGIMWLLWVTAAIVGERRRSNAGTKIDGESSPASSLAPHKERYAHRYN
KZM20380.1	>ST47_g8490	MQLLTSVAAAAALLASSVSAANLTGDVLNGVPVIHDLNLADVPAQKVSRYYLRVGELNGGHPVHIPVMVARGTPESLETGQKLSLSGAIHGDELNPVRVVQRIFEQLEDQVATLNGTVIGIPTVNPMGIYLNQRNYFTASASGSLTNVNRVFPGVSAELGGSGPNILAYNIWNYLWGNASQVDVGIDLHTPSSGGETSLWCYSDWRLPYVERLSKLLQPDTLKIDVGEPGSIETTFVDYGIPSLTVEMGQAKIWNTSLIDRTVDFVNRVLVDLSIVPSNTTVEPDLSNVYIANTFHDTYTQYGGFVERLVQVDEPVTKGQPIAHVRNAFGDIMETLVAPADGRMFQSPRDPSCEPGSSVGQIAYNSTDPECADGCILSGPTGSRRR
KZM20395.1	>ST47_g8452	MRFQSLLLSFLGVGLVASANVPTIWLAGDSTTAPDGGHNGTEGWGQYLKYSFGDRAFVNNSAYAGRSARSFTREGRFAKIAQALQPGDWVVIEFGINDAGAPQNGSTSTTGDKGRADCPGAGNQTCTVLFNNVTEVVQTFPTYVKAAARSFLDLGAAGIVIAEQLPTNVWESGNYSYISPVFAYYNMLATLELGGPSSNVFFVQHGGYAAQAQRLLGKTVVDAYYPMDHTHTAPFLADVHSQAFVLGLKCGTSPLASLVVNATARIEQARGPCLPANATIPI
KZM20396.1	>ST47_g8455	MGVLAIILAACITLVVLFEPIYAVVIPGPDDAHAYKVAVANFPLTNIAHQDPHDPQLNRKLEVSLFLPVKKTDCTGEHVKLYMPPGVAHASDVQFFGNKSTGVFAKMEYKVCSGSRQTIDASKHPIVFLEPQVGTSRFLYSTLARFMSANGMAVALIDHSHESTISLDEAVDGEAPRNDSVGLNPFTELTAWNETVTKTIDTRIEDINAVLQGLSDVSFLQRQFPSLKLNATFDTSSYTVVGHGIGGTTATTLSMLDPRVRFSINLSGSAPLLQHPTSADIYFFGRSDFRRENDIHWSATWKNLGGKATEWDLKDAGLFDFSDLPWVVDLARKDEKMTIKEVKGLHGSLGPFGFHGTACFLEAYLKAELVVPKDFGAIGDCVRMFDQMVPYSGPVKAVI
KZM20397.1	>ST47_g8454	MLPKIAKATALLAFLPAAASWALPGEAINLNTPSALKVPWKERGLYSDSAAVKSDGDGYSTRCNHGPAARSCWKDGYSVDTDMDLEWPTTGNVVKYRFEITNETMAPDGFERPMMVINGQYPGPTIEANWGDEIEVTVINHLENNGTGLHWHGMRQLGSNEMDGINGITECPIVPGGTKVYRFKATQYGTSWYHSHYSVQYGDGLTGPVIIHGPATSDYDIDLGVLPFTDWFHATAFTVNQATLHAKGPPTADNLLVNGSMTSTSGGQYAVTTLTPGKTHRLRLVNMGINNWVHVGIDGHPFTVIAADFTTLEPFQATSLNIAVGQRYDVIINATQAIGNYWLRVGTGGRCDGPNANAANIGSIIRYAGAKNANPNSTAAASLPAGCYDEVIVPHVKTN…
KZM20411.1	>ST47_g8415	MKLQLLSLLPLASTAIASWSKNLNYRSPSEHHPGLGISIHRVVKRNDPQSSYDTASLNFTHGVASGDPYPNSVILWTRVAPQSDNSQSNLTVSGYASLYDHDNEKYVHVSKSPICVEYKVASDQNLTSTVESGKVYTSSDVDFTVKVEAKNLKPYNTYYYQFNVCNSSNKSPLGRTKTTPNADDDITNVSIAVYSCANYPFGFFNAYGNVARKDSVDYVVFLGDYIYEYENGYYGWGNSLGRIPLPDREIFSLYDYRKRLATYRTDLDLVESHQKFPWIPVWDDHEVADNTYRDGMAELNNTEDSFIKDGVGVAVDQRKMNAVRAYFEWMPIRQVDMDDNLRIWRSFSIGKLVDLTMLDTRQYDRSITDLYWNTDYVHEISNDAGRSLMGSRQENWFYR…
KZM20414.1	>ST47_g8416	MYFSAPAFITILTAALAVAAPTAEPHNKVIDKKTYIKDCKKDLDDKWNQKNDDWKKNEKLFYFDAEYVVKATPEQVINTTQIPAPGQPGAKGLFKYGINIADNTICYNITLSGVTGEYRSAALTSTHIHEAVKGRSGPPRIAFPNPAGPDERRISTGCITGPFKTGINGTDGADTGAAFHVRQIVANPAGFFTDSHTRQFLPGAVRGQLA
KZM20428.1	>ST47_g8438	MPSFTYLTAVLALTSAVAATPLQKRDTFSVEQVKHKLQLKNGPAQIAKALRKHNKAVPAHIQSAADARANTASAVISGSEPANPNSDYDESYLSPVTVGTTNVNLDFDTGSSDLWVFSSLQASSQLSGHDYYKVDPSKLKSGYSWKISYGDGSGASGKVYADTVTVAGVTATSQAVEAASSVSTEFAQDVDTDGLLGLAFSSLNRVTPVAQKTFFDTVKSSLAKELFAVNLKYHAAGTYDFGFIDTAKYTGPITYVNVDNSQGFWGFTASGYSVGSGATVRSSIDGIVDTGTTLIVIDSGIVDAYYAKVSSATFDNSQGGYVFPCSTVLPNFSIIVGGVAQVVPGKFINYAPISSGSETCFGGIQSNDGLDTNIFGDIFLKSKYVVHDVSTGTPRLGFA…
KZM20438.1	>ST47_g8559	MSIFLQVTLLVSVVAAQLTTSIWLPGAANANQSFVGSVVTQLGDRTTLSVGFDGDAILTEYYGTGPGYVTVGGTTYMAYQATATDPGSDFSVTVDLACSRENGKAAPTCTMTTRNSVLDSSLDSFSCTTLGDSSTSTYVVTDTLRSSISDGLPVTRTIAETVTNGCTKYVGPSVLPQTTTTMSGDEQYFINNYKLIITAGTEKLSASAAVTPIESGAHSTISLVNSTARSSGTAQATGAAAPKPYMAPVLAGLGTAVILFVQHDFTYIKV
KZM20463.1	>ST47_g8346	MKSTTSIGAAAALLVGAVSAQSFRRLGACPTLGCVFPPDQADFLAGQYFDIRLEVHQPKNGSEAIGLPLDEKFTFTITKEGKTAPVTEYFKIQEPKLEKWNFTWYEDLFARDAKNASFVNVAAKAYRRVALYEPGEYTATLNYNNGSKTEATWLVRDLAEERKTKNIILFIGDGMTTNMITAARLIGHKSINGKYQTTMAMDKFPVLGHQMTQSIDSFITDSANSAAALNTGHKSTVNCLNVYADSSKNAFDDPKVETIAEMFHRLTGGHIGIVSTAYIADATPAALVSHTRNRGEYGAIVDTYLNGVQNYTWTNVPVDVLFGGGAEQFYPPSLGGVTYQGKDYYEEFAKKDYQIIQNRTALLSASNTEKALGIFSTSNMAKWLDRNVYRSNLNQTVSP…
KZM20487.1	>ST47_g8336	MTDPLSIAASIIAILQLSAKVLAYLNDVKNASKDRAQCAMEASNTHSLLTNLRFRLEASTGSEPWYTAVRALAVENGPFDQFKAALLKLQDGMTEGGRLKEAGAALVWKFKRQETVDILNRIERLKSVVEVALQMDHFKLSEAIKRDTESTRADIPMIHSRLNTVQQSQDEEKRQKILAWLSQSNHPAQKSDIIGRKQEGTGEWFTSSPKFTAWLREPGATLFCPGIPGAGKTVIAATAIEHLEKTTRNDTEAVAYLFLNYKEQESQNIVDLLGAIVKQFVQGRALIADHVLELYRRHGGTVKPSTKELANALQAVVSELGTAYLVVDALDECSDSDGTRRQLLAHLRLTQQHAGLQLMVTSRPLPDVVAEFPIATMLVVRADSDDVKQYVTGQLNRLP…
KZM20493.1	>ST47_g8356	MKYTTASVIALAGAANALPHPILSFPSFSMPSFSLPTGFGGGSSTGGSGLGAGLGGLGSGGSSTGGSGLGAGLGGLGGSGSPFSLPSFSMPTGLGGQGFGLGNLGGGSNIQVTATPTASGATPTKTSSAGGNTGGGAANNGASCGGTGGGSSENGVKGGNCCTDMTVIFARGTGELGNMGTISGPPMVKAIRSKLGADRVTVQGVDYAASAAGNANLGADGGKVMAQYVQQALKQCPSTKVIVSGYSQGGMVVHNAFSNGISASNVAGAVMFGDPLKRQAIPGLSTDKVKQFCGTADQICGGGGDGGATGSHLSYGSVADSAATFAIQAAGLA
KZM20535.1	>ST47_g8321	MVRILALANLLMASAITTQAAQWCQCLFQNDSHCCVYNDASIGNLDCKRWCTNAHRADGATNPKNPLEAGTACNAGGKYKTVSGITAQFRTPCYKQ
KZM20540.1	>ST47_g8305	MLFTTVAALLFPVTILAVPAQKPAAGDDKCTPVSYILSDYTLTRSPSFAFVSFNIESAFTVDSPYDDAVESGANCEADGADLGNDNECNIAGERTDKLVFDVKGSTGDASYRITHNWKCNNATWASVNDIQLPPLDCNAIEDGKDGETVTCHSKPIIFTPQNIRKLSSKDSKKTAGKAKGVATMPTAKPSDCPSC
KZM20543.1	>ST47_g8306	MQLITVLSVATSMVATASARSAVTLNQECDTSKPMARVHNRCAYDVNLWSVYKGDGCPSDEMVTLKSGETYQENYADPKGGDVGISIKLSKTQECKGNDITQLEYFIQKTSPGFNYNYLDVSYVDCPSNTADCPTRQEGYYLVVGAQTGAVKASSANTWCPVMTCNDPASCNKISYVLPDDVQTKTCEPDQNMDFYMCGGEAPGEESESASSAAPQSSAAPQSSAAPATSQKASSQPSSQPSSQSSSQPQPTSSAAATSTEFEVAAAAITPTPALEEPQVNNQKTKTEVIYVTAYATVNAKRHAHDHARRHQPFHA
KZM20546.1	>ST47_g8320	MVSLSTKSLLALLWASAALATSLFAEPISNRGLEVRDGAVCPDGYTSKNGMNFTTYCKTNNPSNDAYGPFASPSMADCMEHCSRYWGDSEGCYGIVWREDNKCWIRNSTTSVAGVKDSTDGTHSALVAPNTYAKISTTCPEADLSTHTLDGVPGLGYTVHCNKVIDSTFDTCWSGYPKPCWDAQHLDGHFIGFYHTETLEECVRICTDQSPLCKAVSWNPGYEIGFANCWPKSGFSDNDMSTPSTKNGILHTVTITSFDSVDADCPSSQDYTARGNTNFKIHCGQLNEGTNITSIHTQNITSCMDSCATTDKCVGVVFDSTLQNGFSNCYLQNTTSTISNKASATFAALSGSSVPSSSSSSTPGNPNPSPSDDSGSKAWIAGPVVGGLAGLAIIGGAIF…
KZM20567.1	>ST47_g8289	MKYTYAIFALISGATASGTCQTAPPQQGVALYVGDCSGSGPCGPRNKAFILEHNNGYLTIVNSSKSPRMIVEVQQYGYDYEVTDYEQYWINSGDVCTVKIDFAVQGYHSWKA
KZM20569.1	>ST47_g8263	MQFAKKLSLVFIALQLPRALAWSCVSLAQLSCEAREIPENSWEKECINIDSLDWTNPTTRNKTECFCSDKGKAILKRFFDCFYTRASQCPNRSDNFATSYMIWIEESCYHRGKRRFYCNDDWKPTPPWDDIDNGDMKRRYELTDPYQYSLDSERTARGVPWHGCNPDNFRLRLGEGWP
KZM20570.1	>ST47_g8261	MKRSTTVWAAALVMASMSGSGPIGTVAEAMPAPQPQQTPGRPRYYFPRHVKRQINPETANVTAPAAPPSSSSATATTTTSSSSSQLESRQIPNFTSWFSSLINSQSSPSLQSITITPTPQRTQSEPLTGTSDAQVPPVTVSSISSSVLASEPVEVISSAPAASSSVVESSATVSEAVSTAPSSPSSTVEERTSTAVVQPSSPPSSTIEERSSTSVAQPTSAPSSTIEEPTFTSVVQPSSAPSSTIEERTSTSVAQPTSAPSSTIEEPTSSQVVQSTPVVDRPPPASATGVLPASSQIVQPTPPSSPSASAAPSSQTPSDTETEEPSSTRVAQQPSAAPTGTLPPFSEIVQPTTSSSPSAPVVRSSQAPSDIETEEPTSSTFVAAQPPVASTGSLPPSSE…
KZM20579.1	>ST47_g8274	MPSKVSWLPLLALCSLWTGLVGAVSGQEALQALQEARGYRLGELIPVSCLNRTIETGEHITDASGQLQYIPFPTCNETGRALELFFGVEREMNCTIDFVTDELFHLLEFYIHNDAPLSCRIPSKPLPPSVLEQHYRVSESATQEGALGTQSTLYSPLTMALAGTLQLSHLHVGNHLNLLLHAGDARGSGSGRGSGRGSDRDSAGTIDAATAYSIASHVRNAKITIGDPLPLSFSVRWYPGTTLPHGWSGYGGHIYLSTLLYCVLSAGASAAVCVAYFRGVELPRRLRRYARDKMNGGGRFGMGGGSGGSGGGGGGGGGGSGYGLPMPNGGLNRNGSGYGLGGYGYGGSGLGKKD
KZM20593.1	>ST47_g8251	MKLITFTLLVGCALSTPAAVNAFTPTRRAASCDAAKVAQLSGGIQANLEVQKNELAGIKDLQSIGEANSTDSANKFAAQKLKVLAIQQQGIDIRAMNQAIADEITSPATAGLKTVQGAQATEMRQVMGLTGNGKTDDATYQMLVQEVQDGTKQNQANYAAAKELGLNIKAPRLNGFVAFENSKIDAMGVLLSHIEEPIPLTKPLKASVPETKRAEWSRKSKEYVDILHKNDIVWGDAKADNFVVDKQDKLWIIDFGGSYTEGWVDPELSDTLEGGEQGLENIQVAL
KZM20623.1	>ST47_g8269	MHTTFLIGSALFSRSLAAILTPSAAASDPTITPGPEIELLRKQNDDRYMGWLSYDGVWSTQRCDAGATYFQTGGHWRCCATTAAGCDIPQACVNGNLVYSISSTALTIPCTSAYSALTDRSFTVCNTAFMYENQQDSSPQTNVNCGVSSLNWSYYRVQPEDAKTTSASSAPRSTTAAITSDGSGDNAPANPTLIPQATKKKSSSKAWIAGVVVGPIIGLALIGFLAWFCIRRRKRSNTTATAAAPPPSTYNTHPQPVAPTGPASPPQYYPPPMQQTQAASTVPFGVADAKYTPQSPTSPVPSPPATYGTQPQWPQQGGHAGPGQPVYNAPSPSMSPPPQGVYAENSTPYQQPQAHEARPFSSELDGSSQVLPKHS
KZM20639.1	>ST47_g8281	MLSISTFLSILALATTILAGPIPARPDITKVVIPKVRINTRSSPIIKASIENPDPVVGRAAPVVDVLITNPDDVVN
KZM20655.1	>ST47_g8210	MWGSFGCGFSMLMIAVLLSFQQRGSDDPVAKATASASVAFFFTYMLSFGATMNCIPWVYVPEILPLHVRAKGTAVGISANWLWNFFVVMITPTFIPLVFFCYPETANLSLEEVDWLFYEGGAVAKSRRVRKFGWEAEDGAVLEQGSGGSVGSNKEEGEVGTEKREHGSA
KZM20658.1	>ST47_g8207	MKLLIPSCLLLLAGFSTLAGATDVSSTAVPTPLTAEKTITKNEAAYASIDNDAAQDPLQVGSMAPSESPRHRQEKAHLMKRMDRKSGKWGSTHPRYRTLEALYGFTKYRERNMAELNRWRTMYSNMLEKAVNYKKKLDDIEELIYTNEVLCKAIIANAMAFYGIEQKELDEHIKDAVKAKRVADRISTSQTLKHFVRDWADEGSKERNDAFPCLLSTLNALKANPPTNTPLKILLPGSGVGRLGTEIANLGGYSVTLNEWSMYMNIGYRFLSTLSARTPATMHPFIDTLSHHATTASLLRPIAFPNAPPNPAVLLVEGDFTTAFRGHESTFDVVLTHFFIDTARNLMAYFDTIHALLAPGGRWINLGPLLYGTGPFVQLSLDEIVAVVEGMGFEFEDLG…
KZM20663.1	>ST47_g8206	MFFTRSLQASATLLSLSALSEAWVLHRNPDQHAEVKTPPAPDTQPAWSWNSFFPKRQGDVTLDCPDDQFAALLSNNPDSTVETFCNDWLNIPPTTVISEVTPTVTVTTSASTTTTQTNIERILTTTTLVETATISAMPSVRRRMMAAAAAQVESIASSIVESVIASGTPTSELPASSKAANRLLAEQGLATACSCKMVQPTSTVTQLYTVPAVTSTVGVRVIRVIQQTETKTYTSTTSVRASTADTTSTSASAASSAADAASSSAVAQDSSSASVAAESSADVASSSSAVSSNAAEPSSSPVVTAAPIVSAVVSENSTSTATEGVPVVTAIPFSCDEDDITKDVDQVVGGIRLGYSVYCNTELVSADRIGRPINVESPTSCAAQCSLLNAKSGQDTCQS…
KZM20666.1	>ST47_g8174	MLAKSVFAATMFALAQFAVASPPGCLLGAVNEYANPADMKSVCKDKDAATKIASACGDDTKAALSAFAEVCADQGVKVATDAPTSTSGSSIKPSGTGASASASGTGSIIVSPSGNATLATATGAAPTPTSATGTSTTGPPESTGAAGKLEVSLVAAFAGLMAIAL
KZM20676.1	>ST47_g8190	MHFSSLLCAVGLLAIVSAFPNVPFVTSGQWVHDSTGENFTYVGVNWPGAGEVMIPEGLQYQSIASIVSDIKSLEMNSVRLTFAIEMIDDIKDNGGDVTIQDAFRKALGDTNGTAVYQQVIENNPQFGPSTTRLQVYDAIATELEKQQIYVHLDNHMSKGKWCCSTNDGNAWFGDADFDVTKWKRGLQYMAEHSKQWPNMVSIGLRNEFREPDDASSSLPYDWPTWYEQNIAAADVVNAANPDILIFLSGLNFDTTLQPIPGADDLGDGKKFLLTDFKYADKLVLEMHNYQNSATNCGDIEGGLWNNGFRATGEEAVNKMPVLLTEFGFTQADGSYDSVYATCLRKLMPQWKSGWMVWALGGSYYIRTGTQDYEETWGLLNHDWSAWRNTDAIEALKSMV…
KZM20677.1	>ST47_g8191	MLFSTILAAGLAQAMTASAATMMVTVAANNKFQFTPNSITAQPGDMVAFNFVAQNHSVASSTANNPCQPERNAIFSDFQPIPGNPNGSPNGGGNGGGNNRNNNRQAGNTPMFMVPITDTQPMYIYCSQAQHCQQGMVMVINPPNANAVTQYQNKAAQANNNVSPQGGMSGGSVTNNKAGTNPKNVLGAQAGDAATQTGKGKGKGKGKGKGKGKGKGKGKGKGKGGKGNGN
KZM20691.1	>ST47_g8151	MHASLSTWLAVSAAVWPTVTAFYPYRYDDGSKPTASSRRSTRLPRPDSRSVTLPLRRVPASLRTRQNAYNIVNSKDPTQKNSVAIDQDGSDLSYMVAVTIGDSKEEYHLLLDSAASNTWVMGQDCKSDACGIHTTFGHGDSSSLQTQDTPFSVTYGTGSVSGTLATDTLHIGVSLSPSVTFGLATNVSSEFKAYPMDGILGIGRGANVKGAVDAPQIMDALKTENLIGSKLYGIHLSRSSDGLNDGELDLGDVNKARFSGDLNWLDCEPNDTGFWEVAISDASVNGKTLGLQGKKGIMDTGTSYILMPPADALAIHSQIPNFAQSGETFSVPCDTKTPLQFIFGKTGYNISTTDWLGGKLDSGLCRSNMVGRQTFNESQWLIGDVFLKNVYSVFDFDGN…
KZM20694.1	>ST47_g8189	MKLLLISILSLAFVAIAAPSGADYDLVGFAKNNPIGPTTGGAGKESKTVTVSSVDALVSAVAGTEPKIIYVKGNFNLTARLRPGSNKSIIGVGKGAEITGAGISIVNATNVILRNFAIRKIVNNDGITIQNSTRVWIDHNEFSSEISVAIGSDYYDGQLDIVRASDWITVSWNYFHDHWKSSLIGNSDALRDVDTGHLHVTYHHNYWRNSGTRGPAGRFGHQHIYNNLYQDFLYQAIHSRSDNQVLVEGNVFTGNTREALSTYGLVVPEDSPNTSPDGDFEIDGFANLGAKNDFGKARVNITQVGNFTKAPYKYKLTSLKDVTKVVKRGAGIGKI
KZM20696.1	>ST47_g8183	MPSLLLVVFTLQFVLHLVNTVGASTVDELLWVLYNKLPTPTSGCAQRCEALKKEIVQLKRELGNTSAQDNFGKWAKLDRQHNKAVAEYQKLDGSLRTHQTTFNSAVKTLRFLGTQGLRFVLQFWFAKSPMFWLPAGWVPYYVEWILSFPRAPLGSISIQVWTAACAAIIALASEALAAIWVLATKKPTPTAKQQEKEPMAFKADQQPASDAGGKKEL
KZM20699.1	>ST47_g8180	MHGLASLLVCLASQLGAVAAASLTDVCTVGYCTLGAGTSGGQGGPTVIVSTLEALENAVTGNDPRIVVVSGTISGAKRVYVGSNKSIIGRSGKIIGIGLSIVNATNVIIRNTIHQKVPSTFEDAITIFRSTNVWVDHVDLSADRDHDKDFYDGLVDVTRASDFVTISNSYLHDHWKGSLVGHSDNNQAEDGGHLRVTYANNHFFNIASRGPMFRIGTGHIFNNYWNQMDDAVRTRAGAQLLIESSVFENTNDCIFAKNGYAVVRDVDLGIGTNEAPVGTLASVPYTYTLLGSAKVKAAVVGVAGATLAL
KZM20733.1	>ST47_g8126	MVGPNLALLSLSGAAVAAAQSFQSTPVLGWNSYNQVACSPNNDGITKAINALADRGFVAAGYNYFQVDCGWASRDGQRNASTGALEINASAFPNGLKPLSDLARSKGMKWTMYSDAGVRMCDTQVPSPVLGTLGHEAVDADFFKSLNTEYVKYDNCYVDGPNTNQNAPKDPRTDFASRFGVMWKELQRVDIPGMLICQWGTPFSTSGGLQGPKDWTKGISTSFRLSDDIAQGWGNVYRIYNQAVHIAASGVIGPGHIADADLLEVGNQGMTFDEQATHFAAWAMLKSALMISTDVAALSNDAVKVLQNKDLLAINQDSAVKPITLKQRWTSDRDLWSGDLANGDAAVLVVDLSNARRTLTVQLASLGIQSATIKDLWSGTTTQNAASFSKQVNARGSLA…
KZM20736.1	>ST47_g8142	MRSTIVGSAVALLGLFHTVTAASTTPVAYTDPNTGIDFQLLNANGNYTVAIALPETIDTDLIAQLVVPISKTGAWGAVSLGGGMLNHLLLVAWANGEEVVSTFRIAGAYANPPVYDATAVSALPIANGTFVNSTHFSYTFLCKGCIVGGTTTFTKTDENPVLGWALSSSNPTTPSDPGSALPYHDAGFGLYGQKASAAQSASFETWASWASAATGNGTAPVTPPTGNGTSVVPTISNSTYDVIVAGGGPAGIIAAERIAEAGLSVLLVERGPANTVALGSSEGLEWNNTLTQYDVPALGSSLSAIPGTKICSDTASMAGCLLGGSSSINGENFIRPPERDFKNWPAGWSWNDVSEAADRLYSRNPGTTQPSADGKHYDDMAYTTVSSYLGEQGWTELDS…
KZM20748.1	>ST47_g8080	MKWLFALVPLVAAAPALPTFNGGDAPAPGQVKITKVGTGGTGCPQGTVSSVISDDRSTMTLIYDAYVASIGPNIPVTEQRKNCQLTVELEYPGGFQYSILSADYRGYANIEKGISGTLKSTYYFAGLAPQTSTQYDFVGPVTGDYVKHDEADSTSTVMSPCGSKGNLLNINSQIRLTSSNSKATGLLTSDSTDLKFKQIVYVQWKKLGSDIVSHQHRSLSPFAIYPSITERALNNATAALVNHMAGECHEHSWSQWESDSGYGSDDVLPNLAFDPDPLATESDEVLSPAAFAALIASIEADARERLIPSSSDAVQTDSAHTAWTSPHTLSTGSLLYFDEQRPPSLLLQGEAALEDNQAQFAPPTKQKSGFHRACNLKHATKAKTSGNRAKRGRPLGSRD…
KZM20750.1	>ST47_g8082	MRLSTFLFSSLLSLAVSAAPRGSSKVPEFFSQRVVFTPPSNYTDPRTLYARTAEFENGNLLATWENYSPEGTDPKSKVYFPIYKSTDGGYNWKEISRVYDQAQPQNGLRYQPFLYVLPKKFAGWPAGTVLLSGSSIPTDLSTTQIELYVSTDKGYTWKFVSHIAAGGEAVPNNGLTPVWEPFLMLHQNKLICYYSDQRDNATYGQKMVHQTTTDGKNWGPVVNDIRHSRYTDRPGMPTVTLLPNGKYLMTYEYGGGPTNSSSYKFPLFYRLSEDPEKFDSAEDHQLITTDGTIPEGSPYNVWTPIGGKNGTIIVSSGTNGDIYINRGLGEAGTPWIRVATPEKQHYTRHLRVLKNSKKLLIMGGGVLPPTTTNKVQLSVIDITAFPKA
KZM20754.1	>ST47_g8100	MSRFLTTTLAALAVAPLAMGHTWIEQLRNVNDKGEYVGEYGYPRGMVSKTDKGYTGDSMNWLLPVQPKVFIDETSPLCHTSQTKQEQSSDNYPRLQSVPGGFVAMRYMENGHVTMVDPATGLGKPEKGGTVFVYGTTNPTEDEKLVNVLRWTQDGSGGDKRGALLATNDFDDGRCYEVNATPTSEERRVSDPNFAMGQVSDGPGNYPLFCETNVQLPKDVTEGKPYTLYWVWQWNTAPNVDPGLPAGKDQYYTTCMDVDVASADTALTADAESKYALGPQQDAMSIAVSDFASRTAIMTNALQGEVGPIFSGSATATGGAPAASGNSSSSATATATATATAPALTQITNIPTMTTRPSTSPKPTSGSGDAVTVTDIVYVTVTASGSSGSKASATASAPL…
KZM20761.1	>ST47_g8108	MDSLTILFYTLTILGTGTATYLLSTGRPHPQPPRAKLHGAGNCKYILDNSHSRTFKLPDGRTLGYAEYGDPNGKAILYQHGIPGSRIEATRYHELGLELGIRVISIDRPGYGWSTRFPRYRDRTVKSWGEDVEALVEHLELEEYAILGVSGGGPYALSCALHLPRTRLKALSLICGIGPPGISMRNAAWPTYIGFTIGWRWSPQFLLRWFFSRDAALSLHLSDDDRVRALLDPRRLEGTQGKDRAFFADEDEMRVYVATSREGFGQGFDGMCKDGFVMCTDWGFRVEDIGKDVPVVMWYGTEDVNVPPHHGRTIAARLAGEGEVVSEVTDNGPLQWSERVRLRMLDDTHASISMRDKRGYLVDILEAWGQ
KZM20767.1	>ST47_g8081	MLSKIATVAAFAAGALAHGTVTGVTIDGKFEQGFSLDYYYAKQNGQTSPEHIGWYAENLDNGFVEPNSFGTADIICHKAASPEGSSDSMAKVAAGGTVEFHWSTWPESHMGPVITYVAPYTGDVASVDKTSLKWTKIDAHGYEDGKWAAVKMIGQNNTWPVTVPESLAAGKYVFRHEIIALHGASSANGAQNYPQCLNIEVTGSGTEKPEGVVGTSLYTVDDVIFNPYASTIDYKVPGPALWPAGSGSGSSPAPSTPSNGTTPATPTSAPAASSAAASSPAASSPAASAAAEVTPVATPTASPTPAPSSGAGSELPKTFTIDTFIAWLEEAAGSSTSTKARRHARSLLF
KZM20771.1	>ST47_g8085	MEPYSRLSSSQAGTLHLPQALVLLLKSALAQSANVQATQGFADLTLWDTIRLSTYRLILFINPFVNRGNFVTSAIVGMVKLTALCGSAYWVWNRPGRKGRSTPSIHSQYVQDASQDDAATNDPGLLRKHSTIQSYTVPSSKITYPAIRTFYRPHPQESKFPRKPNPVPLLVFIHGLGGSTAQFHPILLSLSNLASCLAIDLPGCGLSLFDPKTSEAYTTDALVQLLAVVIEQHRAKDEDQTVVLIGHSMGCSLAALLASPTSPHASLLSRHVSGLIAICPKADPPTEHQTQLLRRVASVPAVLFDLYRRWDRRGGLNSASVLRMAGIDAEEETKKLQLRFNRQSRTAVWQRMARGMCPDYSITPPKGGLPGRKTWEGLQIPVFLSAAEADEVTPAENVK…
KZM20775.1	>ST47_g8073	MLFKLPSLAIQLLAAAAYVSALPTGLEKRAVIDHDAVVGFPETVPSGIVGTLMLKYKPYLEVFNGCVPFPAVDSAGNTGGGLATTGSSNGDCSSSTGQVYARAGTYSGKFGFMYSWYMPKDSPSAGLGHRHDWENIVVWLSAESTSANVTGVAISAHGGYQKEASPPFQGTSPKIGYISYYPVNHQLISTSTLGGQQPLIAWESMTAAARTAIENTDFGAATPSFRDSNFQSYLADAYF
KZM20788.1	>ST47_g8068	MTKAMLLLFLFLFFSFAARVVAPEDDCRYDAVSRFKLLLDRLDNLRDVQQTIASNVAPVLPSGLLAALLLTGWCALCARRIAASWKVFSRWVESIGSAYPSWSSALLRCVVLVNLLLKPFRNEVEQDRVLAAAKAEAAIALQEVQRDLSDVEEKLAAATQRAARAEQAAEIAELGQQEAETSLVQITANCAAERVLLATLKQQVTRMEQATSEGLRKKHRVEKKNYVRITSAATYQTSTPGWGLPWPGRASV
KZM20791.1	>ST47_g8061	MVAFTYLPLAITALLLMGRGIAAAPSIANELSQQTACGSVNGPCDENGCAGFNDPAGGSSGVCSAGQWAGCHCQSVCGSSPGPCNENGCEGQFNLGTGIGQCQAGKYRGWLCK
KZM20792.1	>ST47_g8062	MKNSFAASLVFLVSLATAQQGAPIGYAAQNGGTTGGKGGTTVTVASLDELTAAVGRRTDTTAKIIYIKGAITGSAKVYIGSNKSIVGLDSGASLTGVGLHIDNSKNVIVQNLKISKVLASNGDAIGIQASTNVWVDHVDVSSDIEHGKDYYDGLIDVSHASDWVTVSNSYIHDHYKASLVGHSDSNGAQDKGYLHVTYANNHWNNISSRTPSVRFGTAHIFNSYYSGVFTNGIDTREGAQVLVESTVFAKTAEVIGFFDGKVTGYAIAKDVSLGSGNNTAPKGNLTSVPYSYTKLGSASVKASVLANAGNKLTIKA
KZM20798.1	>ST47_g8055	MSKILHTAVLLAGLVAQVSGHTAVESAEIGGKTYQGFRGLSIDDALEGNSPAWKTNQGWGYQPVMGSQINKPDIIAHKDATPSPNTAEAPAGSKVTFHWHHKGQCQAGNEEGWDCSHHGWTATYLAACNGDCSKVDKTQLEFFKIDQVSLTGYPAGTRFAKGDPREQTGKWGTDAIFYDNGNAHTVTIPGEIPSGNYVLRTEVASIHNNGGVSERQFWPQAFNVFVSGGDDSKPVPKGVKGTEIYSPKDELLTWDLYWHDAGKTIDDAPGPALASVAVASNTRRHARDFTN
KZM20800.1	>ST47_g8056	MRSLPLAIFSSLLASARLAVADDMITNLRIKVQLFAAPAFFSEVSVDAYNNQCLSLDNNLIDGRVQSILVGGHDVAAVLSRDDYWYCQFFDNYDCKSDRSDQYLTFADGVNNLASIAAREASAVDTMGPTWPDQFASSPRTALAMTKPRRRKSPAVDVGNG
KZM20816.1	>ST47_g8022	MFLRTVVLSLSTCASALHARSYIPSQSGSSNSSSLASVYSSVISSTIQTTQPATNTVAPYPTKSNGTSNPSAPSSTATSGSCAPYWLESIKHQGLASFNPNPDNYTIFRNVKDFGALGDGVTDDTAAIQRAVTQGSRCGPSKCESSTNTPALVYFPEGTYLISSSIIDYYYTQLIGNPNCLPILLATSNFTGLGLIDGSPYLGTGTRPGQTGFGPTNTFFRQIRNFVLDMTNIPANVSATGVHWPTAQTTSLQNVVFKMSAANGTQHQGLFVEEGSGGFMTDLVFEGGNYGFNVGNQQFTTRNLTFNNVVTAINQLWDWGWTYSGVKINNCQVGLNISAGGPSAVNVGSITLFDSEISNTPIGIVTARTDNSEPAAAGSLYLENVKLNNVGIAVAGPNS…
KZM20838.1	>ST47_g8010	MRYSIAFAAAALASSVSAHGVITQVQGANGVNMPGLSLIDGTPRDSGNPLSGSEADTSIIRAKEMGGKASALGRTQGGGPVDAGAAIAKFMGTGGAGGAAAAANNKRGLLDALTGGKGGKGGAAASAGTKTPKGTKENGVAAAAGQGATSGLPTTADDGTITMTFHQVNQDGAGPLKAAIDATSGGTDPAAFQAATVTQDVPGIGIGGLSAAAVMDFPVKVQMPQGMTCQGTAGGAQNVCVVRMQNAALAGPFGGSAAFTQSTQAKKRAVEYNLRKRHMARGILGKPE
KZM20842.1	>ST47_g8006	MRYQVIAIFAAAAAVTAAKPHQRIYHHGHAHVRRMARPDSAVYAPAPVETVTVYELDGRLISEDEARRGIANGTLRWGDDGFLSTFTTGPIALPTTPPTPSPEVKDPVQKQPPTTEVHQIETQQSSLPVKEAPTTVVPAPSSAPAPSQDPAPISAPDASPDDPNDLVDKDGNCASCDKPFPNGVIPCSQFPYGYGAMPLGNEGLGGWSGIQDPGYRGGDGFDNIRTIVKGSCSDGSCCTEGTYCSYGCPNPYLKLSFPKKQGKTGQTVGGLYCNDQGMLEMADGSIGKTLCGKGSNKMTVKVQNKLSKPVSICRTDYPGTESMTFPLTVGPGETGYLANPDQSKYFFWEGKPTSAHYYVNKQGVPESEACTWGQDGKGVGNWSPTIFGTSFDDLASNVG…
KZM20849.1	>ST47_g7997	MFHRPALILSFLLLALFMPTANAGRHNPPPRNCTECTAKMEKCHETCKAMTEDSCRFYCECNVAESDHFCRDSCGIGGPESACGYF
KZM20850.1	>ST47_g7996	MLHLRPLMMFIGILFTVAIILPAATASTYKPTTSCATCESRVHECIKMCKDRYEDDMSLACKVACECKVSKQKKDCAEKCGLGCESEIGKTDARIGANEE
KZM20856.1	>ST47_g7998	MPVLTTTLLQSFFLLWVSFVRWGTAVPLRRADDCPGYKASNVVRSDNSVTADLTLAGTACNIYSPDLTDLKFLAEWQTDSRLHVMIYDKDQQVYQVPGFVVPRPSGSTNSDVSLLDVSVEEEPFSFTVTRKSNSEVLFSTKGSNIVFETQYLRLRTSLPDNPSLYGLGEHTDSLRLPTSNYVRTLWARDAGAVPLNTNLYGTHPVYFEHRAESGLSHGVLLLNSNGMDVKINDDDGQYLEYNTIGGVIDLYFLAGPMPFDVAREYSEITNKAAMMPYWGLGFHQCRFGYKSIGEVAAVVANYSAAGIPLETMWTDIDYMDHYKVFTLGQNFPLAEVRDLVSDLHSKHQHYIVMVDPAVAAQDYDAYNRGVEADAFIKTSANVPWKGSVWPGTAVFPDWF…
KZM20858.1	>ST47_g7977	MILKPAVLAGLLSVVTQVLADVAPEVTTIAGGYNYIAKLPCIGCPYLYQDTSTGENGPWASRVDDNALLLNISLPFDAAHLSINNAPLLSDSRTLPRIYASQVISDYSRDDLSNAISTTSLDTVGPLLGLSYGYSLRRVTNSTALVFRFNVFEARFSPSTHNPLLKTPVVVKLDNPKQRVVELILLPRPLLSAGDVGPAWEIVSVRLVNRDKKGSKRRMKTMVFAEWDEFGRKGSPTHLVSAYSNGVVTYASSGFWGLSVAILGFIVVFVLSVVGCVVGWDWWSGEYEKAQHGKGEVSECE
KZM20867.1	>ST47_g8016	MSRSFRRSNPITLVLAAILCLGFLTGAADTASSPLSPPSLPFRKSKPNAPHAVPPVVHYYMNNITTSRTPMENEESVLILTPMARFYNAYWDNLLKLSYPHHLISLGFIIPKTKEGNAAYAALQAHVTNTQSGPKAKRFAAVSILRQDTEIPLQSQDEAERHKMHNQKARRAAMAKARNSLLFTTLGPTTSWVLWIDADVVETPPSLIQDLAAYDVPIIAPNCFQRYYNDDKKAMDQRPYDFNNWIDSSTAKELGAKMGKDDILLEGYADMATYRSLMAYMYDASADAGAKVKLDGVGGATLLVKAEVHRDGAMFPPFAFYHLIETEGFAKMAARLNWESYGLPNYLEKEKEKEKEKEKEKEKEKEKEKEKEKEKEKEKEKEKEKEKGKEKEKGKEKIC…
KZM20887.1	>ST47_g7960	MKFAAVTILSLAAGVIAQIDPEHCGPKYGNLVCKDNNCCSQYGWCGSTKDHCDASSCLKSFSAPGSSCAPETTSPAQTFPASVPVIDVCGHAQGGVTCPGAGANGYFYRCCSSAGHCGPKNDIQDQSLYCGDGCQAGFGKCDNEKAPAEPTVARGPDAGEGETCGPIVNKKCKSGLCCSGSNFCGSGADFCGHKLIDDHHWPFIAASQDWHPEGHVSSTPAQPDTEPGDAVNITFVDSLLKQETQGVYADHYIAGTWRAETEDGVKNRPQYLEGFRTTDNNQYHQFTALVSKLTIRGIETLIITGLITNACAPGTSTVGIKLGYDVVLIEDATETISAEFKAEAVKGLKDCRVRVMDLTDWDIADPNRLRK
KZM20888.1	>ST47_g7961	MKFILTSALLVSSVFASVVPRDNKKIDYSGFKLLRLENIKGLEAKIEELSAHVLNPGKSAQLDVVVSPDHIDAINSLAESKVINDDVGASLAEEGEMGVYAVPSESWFTAYHSYTDHITFLRDLQAGYTGNSEIVTSGSSVQGRVITGIHIWGSGGKGSKPAVLIHGTVHAREWITTMTTEYFAWQLLTKYASDANIKAVVDKFDFYIMPIVNPDGFVYTQTTDRLWRKNRKTISGNSCVGTDINRNWPYKWELTNGASTNPCAETYKGQAAGDTPENRGLVAQVQSLKNSRGIRLYIDVHSYGQYILWPYGYDCSLRAENDAQHRTLATNAASAIRAVSGTAYTIGPSCSTLYATTGSSTDYTDVTGNATYSYTYELRDKCTYGFALPANQIQPTVRE…
KZM20907.1	>ST47_g7936	MSFLWLVVPILVGLTIARDPLVDFCRLHSHRTAVVDRKLYVDAGFVNWAPIKADPANQTNTWLRVADFGTSRLGFPNQTTLEKNAAAPSVSGGILWPDTVNKIIYAYGGEHENSDTADKRLWFYDILYDTWNVSITNSITSISPAAWGAGTIASNKALGYYYGGWPTSSTNSDDSSTKALSTMVVYNMLENKFSTQLGPDQIGRAEGVMLYVPAGDAGVLIYFGGIQVINGTHQPLPMSDIFIYDIANARWYRQTTSGAELPGSRRRACAGVVWAEDRSSYNIYLYGGASVGEGEGYGDVWVLSLPSFTWIKSVPTAEDIVVTTPRHSLTCDVYENSQMVIVGGHLTKSTDCDVPWIYGQHSLYLGRSNIDGLKRAAFNASLSTYDVPQEVTDVIGGDS…
KZM20940.1	>ST47_g7920	MTVLAGLALVALALGAPADLGNPHSSTGSTTAWENTQTQEYHCEGNDIVRCETTPGGVCFAMDLCEAYCFHHDSGASCVDLGAPAVETSNNVEITARKTSISVTGVNVAARDASSQEDMHYTCSRNRASVLICKYGFCSIDHYCRSGNECKDDCSCCKSAFPSVQGAKSEVRIVPKDAAISLAARGRNPKESALYVCSKDRASVLKCRHGFCATDYYCENTIRASTNLHAARKSVMLETEVDDC
KZM20959.1	>ST47_g7891	MVASQILVAVFVAAASATSLVGREDVSFASLLKRQEPGTPAYNCHDNCGSAITLSRTTNPCDNPAFVADYNNCLKCSGPDNYNIWRYYGGTLSTAGAGCGFDTEPLSGKQEDVPEAGSTGAAFSAAPTQTSAAVQSSTVLSGTPSTVSSAASLASSTAAPISSQAAATTQAVTSEAPVSSVATLSAPLTTVNIPAVSSAAIHPTLIANATLSSSVPGVPLPSANASASSTTSAPAEVATNAASSRRTADVAGVVGAIFFGALFGM
KZM20960.1	>ST47_g7892	MRTTLLYVLIAVSAVLSNAQTHGEGEEGSSMGPVAFLWPPDRVWDAQHDNTAPCGSSAEPSNRTIYPLSQGAVALSIADEAWHVAFRLAVSDNPTTQADFDDQVVNNVTDIDPGHQCYSIDRLEGIPAGTNATIQLEYWSEYEGENNGNNQSFFACADITFVETIDFSIKVPCFNVTSDEFNAPTPSASASGTSPSNTGLSISQSASPDHSSGGGSGLSTGAKAGIAVGAVVGGLALLGAIGFFLWRRGKNTGLKSKDAYELRAKSLSTPPGSTSA
KZM20973.1	>ST47_g7885	MRSLLRYTLLALPLLGAAIAEEPSTQTSDASNSIYANAQEAFQELLNVLPEESLQAALNSLTKFKAGVFESHRSGVEHVHSNSPALATKLIVAAVQDLKNRQVAAPSNGTTPIVPSSQAPEQPQSSAQPSAQPSTQQSAQQSTQQSAQPSAQPSTQQSAQQSAQQSSQAPENTQQQSSEQAPATTANAPATTANAPSTPTSRPVLIPVQVTTVNQQGSTVVQTSEVFSEVTASVQVTVTRTTTNQQGSTVAVTTQEVRPAVIRTTTDSRGSQVTVTSAAMYAPTRGQVLTTTNAEGSTFLTTYTPGGGRVSSVKLVTTTDAEGRPQTRTSITYVDPTEVGGSDDNGSGSGATPTGRPTVQSGSASKNSALAGLVGLGAFAFFF
KZM20996.1	>ST47_g7872	MKSFLLGTALCVLSTASAASTGCARALASNLTPGSSTYNLTVSSKSVIGKTTQREYILHLPASFSAKNDKPAALVLAFHGQQQPAWSMEKISELSNPAYNGEFVVAYPAGMNVQNPGVQWLGDPLAPTSNKIDDRIFVAELLDHLTSTLCIDEQRIYAAGLSNGGGLTGLLMCDSAINKRFAAFATVAGAFYPDASLTEPLFQKDCLPALGSRRLPYLNLHGLSDGIVAYNGANKPPPASIPIPTWVGGWAERNKCADAATVQTVEGGNVQESSWQCGGQQGLVLHRAIKGFGHGWPSKKKQGEPFDTLRNGPTTWDATPLMLNWFKKWRL
KZM20997.1	>ST47_g7873	MSRLTQLASLLSLVSVGLAQIPNIIPFQVTGSLDACSAGSEYNAGGTISVNEFTVTVPKNLIVQLPVAWAPFPKLCNAGAGDFETTVTGNIVSGKPIAGQIQVAGRFGLEGSQGYISGISNGALQIAGGPTVRINDPEGIFAPKSAASPYFIADTENPSITSFSGFPMCIPHAGNAETCKDSNRPAGQTTFDAPDPLSMVPFKVGDFIEYSGLRSNGEILAWSVTAINVQVTTKASDTVPNYIRVEDMLVGVQDTAANVEVADVRVIGFLSSCAGATVTISAIDVDPCTGAETYRRIGSATPRQETRCKWEARLNTAGLAPYTREYLITTNTPSVKTKNGIEAGQYVQAVGEWIFPEVDIPGTNPPPLIFSDIRGLVQGDFLDDQQFGPLSPFPGAAPP…
KZM21002.1	>ST47_g7810	MRYAIAVSAICGLVTAAPQLINIDAALAVPTPTILGPAVTETKAVPISYNPTAAASAVVAIVKDDGAIEKRDVPSSCGAQQPGGFASNPDSGTADSDYTADSSSLRANARAADTPEGYVVSFTDKLGSSQQIGYLTYKNIDSKTYDVQACADFCDSEKFCLGFNIFYERDPQFEPKDGCANPPAQTNLKCSIYGYPVAEAAATNQGQWRGPQDINGQAFHVVITGSNGYSKTNRNAPTVPDFNAPTNLPAAINAPLYKNVDTYNGMRLFNNNPYDPSLCAAACEGQTTYDKNHPASDGTYKPCNFFTSYILTKNGVPLGTYCSLYTRTWDASYAVNTGYYYGSDKYSVVNAASYEFPTFDNGNGGVPN
KZM21016.1	>ST47_g7843	MVASTFFIAALSFVALSFAAPIGINVVTRAMVARDAYIMFGGDGTVATGWPSRKSWLSFDDAWEANLNTIENSCQVEGWGENNSDAETQAIKDSITGESSATGIPSEFILAIVMQESKGCVRAPTTRWSHENPGLMQSAQGKGTCNPNGNPISPCPASTIRLMIHDGTNGDGLETTLKQCLADAGTSDDSKWYKAARLYNAGRITDNNLGIGPTPCYASDIANRLTSPFNWSTCDSAVIGTLSSAQGTVAESNTFPKDPAPTSSTPTAHSTVPTPTSVAAAAVNNSEPDTGSSVPDLIIEGAAAGCTDYFTPQSGASCASAPVDFATLRKLNTQLNSECTNLWAGYAYCIAV
KZM21025.1	>ST47_g7808	MVRTVLPIDARRPSWFLLLLLASHLTTGMADDTTLSDLSTAAAAASSSPSQTVLQSSTATTPQTPQTHTIQIGLLDHKMRPETTEAAVGDFIQFDFYPLNHSVVRAEYGFPCVPYEMTGTDKKGFFSGFRPVDRVLDRPPEYTVQINDTEAIFFYCSAPGSCITYGMVGGINLNSSMSIDKQRTLAMDSAYMLQPGEPFPAESPLPSGNPASSVLPSPSPSTSLSPSVSVSHTSGGLSKGAIAGIVVAAVCAVLFGALLFFCWGRTKSLREAIDRRDGTVRRVSASPNQIMEYSNLHHHVQPHHVHDASHAGYQTPAPPAGHPGSPSSGYGHQHQNSAGTGYLPTNHPAKYTSSTATHPGYHTVSPGSPPPGSMGLNGHPFMHSAAHDPSSRGTPAPGY…
KZM21036.1	>ST47_g7851	MTRFLLPFTALATLAPLVSAGIKFTSPPAGAKLTAGTAIEIEWEEGGTGPSISDLTTYQVILVGGGQKPEQQQVVKVLTTAGNFALGGNKASAMVETGLPGASTPANAYFIKMVAVGKTGGELTTYSDRFSYSGMTGAWGDAVLQGLDDLDGTDGPATVDGTTDAAGDGAGADGDYDVAYTMQTGPTRYAPMQPIPPTKVTATDTSPLYPTSSVKIATTALPIPSIQTTITQSQTFSVSSVENTASPIHNRHVGS
KZM21039.1	>ST47_g7853	MYITRLAGLAGLLVSLASAQTTTLQAESATLSGVTVATAVAGYSGTGYVEGFDEGTDKITFTVPATTSQLYDLKLVYNGPYGDKYTYVVLNSAGGSQVSLPATTTWTTVSAGQVLLDAGSNTIEIQNNWGWYLIDSIILSPSPKRGAHKVTTTPVSPNANADAKALLKYLGSIYGKNILSGQQDQASLDWVTTNVGKTPAILGLDLMDYTESRISHGASSTDVDKAIAFNKKGGIITFVWHWGAPTGLYDNATQPWYSGFYTAATDFNIETALKDTTNANYTLLIKDIDSIAVQLKKLQDNGVPVLFRPLHEAEGKWFWWGAQGPEPAKKLYKIVFDRLTRVHKLQNLVWVWNSVAKDWYPGNSYVDIVSADTYTQNDHGPISATYNALLSLTGDTKLI…
KZM21044.1	>ST47_g7839	MKSSVLLSLSAVALAAAIAMPKDPQMVLQNPQVTIDEPDQYLIELSPGETRWVTEDEKWALRRQNINFFDITHSDDLSTLSREIAAEKVTFPSKTAHNKTVVPLLKELDQRNMRKHLETFTSFHTRYYKSQYGAQSSAWLFKQVDSTLKDAGAKDAFVKAFPHPWGQSSIIATIPGKSNKTVVIGAHQDSINLFLPSILAAPGADDDGSGTVTILEALRVLLKSKDILRGQAENTVEFHWYSAEEGGLLGSQAIFQSYQKERRDVKAMLQQDMTGYVQKTLDNGEPESVGVITDFVDPGLTEFIKEVITEYCDIPYILTKCGYACSDHASASKAGYPSAFVIESDFKYSDNKIHTTEDKIEYLSFDHMLQHAKLTLGLAYELAFAEFK
KZM21052.1	>ST47_g7794	MVSFKAALLLAGAVMYAQAQDFTDLVGTWTSKSNSTFTGDGFYDPVNDHFTEPKHTGISYSFSADGFFEESYYRAVANPTEPKCPKGIIQWQHGKFQKLADGSLKLSPIKVDGRQMDSNPCLYKNSIYTRYNISETFKRYEVRVDDYHKIKRLNLYKFDGSPMMPLYIAFTTPKMLPTTTLNPLVTATATAKAKRGLPIDHEVLFRKSGNMADGMLWAGILASGAGALLWWFF
KZM21058.1	>ST47_g7803	MAARMPPLLASSLCLASLVACVPNPRTLDSDLTILTHNDLYGNSSHRQASTIVISKRQSYSASASTCAALGETLWSIERVPQELALLQYLGHGSKTQSQTLYWVAGAADAKCTAVTGKGRTQRLPCNTLLPALCYNSAALSSPDSTDTRTKWQTAVTTGNATILGYRDKHSFRFQGIKYATIPNRFSDSVYLPPAGSNISALSYGPQCIQGSCSSGSASCSEDCLYLNIWSPSLPSQKNSKIKKKAVMVWVHGGGFVSGSGSDTTFDGGAIASRGDVVLVTINYRLGNLGFLALHGTSLTGNYGLKDQSTALDWLHAHIDAFAGDKDRITVFGQSAGAASVRALLASPEARHKFAGAITQSTPQGLNYASTFAKYLTITEATNQTKSLLNETGCASTNS…
KZM21061.1	>ST47_g7825	MVVQRMKTAYRSVLFQIVIVGLVAFCEPGIWTALNNLGAGGNASPFLNNAANALTYGLMSVGCFIAGGVSNKITAKWTLFIGAAFYTPYAAGLYCNNRYGNEWFMLLGAALCGIGASLLWASEAAIAVGYPEDEKRGLYVGIWMGIRQMGPLVGGAISLALNIKTKEKGKVTYTTYLGLVAISSLGAPFALLLSQPQKVNRSDGTKIPYMKKTNFKTEARAIFRQLKNPYMLLLIPVFLAGQFGVTYQGNYLTTYFTVRSRALASFLTAVVGALANILTGLALDLPQFSRPAKSKSVYIFVLITVTASWIWNAIVEVKLSRMATPPSFDLGDGAFFNSAFTVYMCFRFFYEVLQTYIYWLMAEIKGAQGDGDVARTTGILRSWESIGSTIAYAIGAVHI…
KZM21064.1	>ST47_g7826	MKSVLVLSTFLGSSTFAFPWLSSDFKEERLEHGLDIISKDLELSTLINDLYQKQVKERDDFFANHNATEECEDTAIGLDKRQSTNCRPHPMGDFFPSTVAGLKKFPEAAYPYQDPKPTDQRGACPGLNTLANHGYIPRTGIVTVAQTIIASAQLFNMGADLTAFLAGGSLIFAGDIPSMTYSIGGADARTNSLGPLGAALGTETGLSGHLRFKEGDASGTRCDFYLCNGDNHNLNPDIFMDLKNQAMEVGGGQYNVKAVTSHFANQYQNSRSKNPYFYFFPPQAALAIGATYFIPGFFSNGTIGAGGVANEASIASFLGASFNDDGSFKSYVPEQIPSQGWYRRAYPMLLSEGIDGIITLYTGAAAQMKNPILFGANTGSGNSFKGGYGLSDFGGKGTF…
KZM21067.1	>ST47_g7823	MASALSSWIPPAEGLLPKWLLFVSLVSTLNSIQAYSTLTYTSRVYNPTSVDPPVKQPAHVTWLSSRTFGTWTFLTSVIRFYAAYNIDNPAFYQLAIWTYVVAFAHFGSEWFIFKTTRWGKPLAGPVIVSTGSLLWMFSQWGYYVKA
KZM21095.1	>ST47_g7783	MRYSFVAAAIVGAVAANPVAQYGYPVNTPSSSAPSYPAETPSSSKPVVPSSSAPAYPEYPVETPSSSKPVGPSSSAPASYPASTPAYSASSSAPAYSGYSVETPSSSKPVAPSSSAPASYPASTPAYSASSSAPAYSGYSVETPSSSKPVVPSSSAPASYPASTPAYSGYSVETPSSSKPVAPSSSAPASYPASTPAYSASSSAPAYSGYSVETPSSSKPVASSSSAPAYPASSSVPYYGSSSAGYPAHSSSAGYPVPSSSAGYPVPSYPAGYPVHSSATGYVPSSPVPEYPTTTKALTTYTTTTVCPVTQTHGTQVITTLTTSTATITSCKGGCNGYETTVVPPKPTSSKPEDKTTVVTTYDWVPCSTEVGHSGSSTIYSTYLTANYKTYTSTIYASQ…
KZM21097.1	>ST47_g7785	MQLTSFLAALAVFLPIVYGAPTAAANSLHPEILAAMKRDLGLDAEQAHVRVARELKATEVIEKLRTSAGKSFGGAWLVDGELKVAVTDQALTSEVTDAGATPFVVSVPLSKLEEAQKALDKIDIEQSLGKRSENTGIAAYYVDVAANKLVIESLADSTAQAAELAKKVGLVESEFEVRTVKALPTTFATIRGGDAYLINRSSRCSVGFSVTTGFVSAGHCGTVGNTATTSSGATLGSFSGSVFPGNGDYSYVRGSSGNTFSGRINNYNSGTLPVSGSTAAATGASVCRSGSTTGVYCGTIRSLGASVSYQEGRVTGLTQTNVCAEPGDSGGSFYSGAQAQGVTSGGSGDCSSGGVTYFQPVNEILSAYSLTLVRG
KZM21114.1	>ST47_g7740	MRLTFISLSSLALTTGLALPGSAAPASDVSLQTRQNAPVKPPPCVRRPGTTVKETHNRHKAFAYAFIYERDITEAFRYIAHDYINHNPLAKNGSDSAWSILSPIWASQNITVLRTTFISPQGWLNYNTSFGEVVDRFRWEEGCIAEHWDQGEVFPSTTYHKSKWVSEAR
KZM21138.1	>ST47_g7709	MLFVVSLVWLFLSALPVASEAVSGKGDCTCGFYDEGTGSLFTDSIIVYFNETKDLPSEFIAEQYNNKYEKDWNAIYRQGADPANLQPSNESIQFLVQPPTDDHIVQGAGLRTARRDIQHGSFRTLIKSPKRTSAGSAMSMMWQFNETEVTELSVMNMNDASEAWIGTFVGGEFTTRDLGVNYTQLLEDPVADRSYTTLQGRLSNNSVNPWDFTEYRIDWTSDYINFYVGGNLTRQILHKDNKGMPSVPSTIYLKHWSTGNRYSMRGPPRRVSVAEVGWTRMFFNSSSTTKEVREDFIAKCSVSDACMMDDSTLRGSTDYINEATNKWRQDPPRSIKRMPTLWISIGCLAISTILLIHTFIRRVTQPKPSDHGVASAPTQSSATAQDTEDVSPEVVELSS…
KZM21146.1	>ST47_g7710	MKVPTLLCALAALAAATSASSQWRAKRAAALVPAYAAHSIDQPIDHFQNSSRYEPHTKDTFKQRYFFDSSYYKPGGPVFLYIGGETSGESRFSNLQTGIIQILMEKFNGLGVILENRYYGHSYPYNTSTTDELRFLTTEQTIADNAYFRQHATFPGVNSTLNGPDVPWIMYGGSLAGAQTAFTMKTYNSIFAGGIGSSATTQALLTYPQWYDPIIKYGPSDCVSRIINIVDKIDTLIQSGNKRGIQQLKEVFGLGALQNLGDFAMTIAFPIGGPMSYPTNTWQELNWNETYGSDDFWNFCSNVTNIDPPKNISSVDTALSKYSNGKPWTGLGGYADYVKKVLLPTCESGRIDSTDNGCFGTQNQTFYADPTNSASRSYLYSTCSESGAYQVAPKSGPSL…
KZM21154.1	>ST47_g7695	MFPSATKILLLAPGVYAAALLGQRGQEVNSSCKAIPGDRAWPSRQVWSQLNDTIDGRLIQTVPQAAVCRPGGYGDISENEAECAALKESWDYPKAFLDNAAEIMNPWYQNTSCSPFYRLEQPCTLGNYVSYAIPVHGPTDIVAAINFTQAHNVRLVIKNTGHDYLGKSTGTGGLSLWTHNLESKEILNYTSSVYTGPAIKVGAGVTGGEALLYASQFGYRLVSGDCPTVGYAGGYSSGGGHSLLNSVHGLAADNVLEWEVVTADGRHLTASPVANEDLYWALSGGGGGNLAVVLSMTAKVHVDSLIGAATLSFNATASPSNGSYVSAINAWWKFLPSLVDAGASPSFNLFAGNFLVHNTTAPGRSAAEMADLYAPYLKQLDALRIPHNFATYAAPSYLQ…
KZM21172.1	>ST47_g7675	MKFETSFILATLAASAVAAPAQFHSAKRWVQTDGAQKMPAHFVASVGNMAGEKLRTKRQLDQLLGGLTGAAGGAGGAGGAGGLASLLGGAAADAGGAGAAGGAGNAAAAAGAAGAAAASPSPAAGAAAAGGKAAKGAKGKGKGKGKGKGKGKGKGKSTAAAAATPPTAAGASVAGGNNSTAAAAGANGNGRAGAASTGNTQKGTAATGTTGTQGGAGTAGSAGAAGQGQTGATGTTGTGSATGQGQTVSTAQQGTGAAAGRGQTGSTTGTNSQTGTGAQTGTGAQTGTGAQTGSNSQTGTGAQTGTGAQTGTGAQTGTGAQTGTGAQRGSNSQTGTGAQTGSNSQTGTGAQTGTGAQRGSNSQTGTGAQTGTGAQTGSNSQTGTGAQTGTGAQTGSNSQ…
KZM21175.1	>ST47_g7681	MAQRRSAGWRAATVGLFSLLASAALAGPDLTTRHEKGRCAIRGQCGKQSFFGSELPCPDNGPAKTPTDDVRKQLVAICGEQWSETDVCCEAEQLDALKTNLDRATPIINACPACKENFFNMFCTFTCSPDQSLFINVTDTAPKGDKFLVTELTHLVSDEYAGTFYDSCKDVKFGATNGKAMDFIGGGAKNYTQFLKFLGDKKFLGSPFQINFPRPDEAEFPDMEAMNKHAYPCDTDDEQYRCACLDCGSSCTQLPEVTEAKQCYVGLLPCLSFAVIIVYSALLALLCTGVAAHVAKQKISQQKNERLRLLQDLEPSDDEDEGDIVHNIGMLDRPTKHYMVNTWCDRLFSRLGYVCARFPVITIVTSVVVVALMSLGWLRFTIETDPVRLWVAPDSAAAQ…
KZM21182.1	>ST47_g7689	MRVLLVSAALAASCNALSLRWFARANEPSHTALPLEHFNTPKWARPLTLDQALSGANASVTTIKPEDLQDAKNQVPTLVLPSNATLSDNTQALEKELDKFAKRQGLCSNVRTRVEWDNASNNDRQGYINAIKCLMNKPASGQFSTSRNRYDDLVGLHQILTPNVHGNAKFLLWHRYYTWTFESLLRDECGLTGPLLWFDETRYAGNYPASSIFSAQWFGSIDVGGGCVTNGQFANLALVYGPGSGNQPHCLSRNNDNSKTINTGNPIVDACNSRSDYADMAACTEGGAHAWGHNGIGAVMSDVYASPSDPVFFLHHGFIDRNFRIWQNNGGNARVSSIDGTDAGGHALTLNTKINVYDFRPDVTIGQVLDTRGSTLCYKYDY
KZM21183.1	>ST47_g7688	MRFSTVASLATLVCASTALPTSNVVLEKIESSPPGWVVDQSANIDRDATTIMLKIHLTNQGMDKFHKLAIDIATPGNPQYGNHLDHEQILALIGPKEESVSLVKEWLQSEIPSDKISVAGDYLTVEGTVNAIEKLLKTTYSTYVNEKTSTRAMRALEYSVPSALVGHLDMIQPTTYFGVKQFRSTISEHHTIEEDKSSVGAAQAVTGCTGSRITPTCLANLYNFANAKNQTAGLLGVAGFLEENAIKTDFTTFLSSYAYFNNKGKSFTCTGVSGSTCPTSPAGVEANLDVQYAGSISSSVPMTYYSTAGLGPYLGSGINLNEPYLEFLNYLLALPAASLPNTLSISYGDDEATVPLSYATNACNLFSQLGARGVSILVSSGDSGVGNTCQVNGKPSFTT…
KZM21191.1	>ST47_g7631	MRSISVFLALVASLTSASAFAFGNDFIPVGASIEVARSDSLLPRKPRQKDNWGNAVAHDRKKITIRASKNETDDISDDFLWALKKANNGGLVHLKKNHKYVIGKKLDLSFLKDVYVNINGELKYTNDIKYWQANNFYYPFQKSITFTVWGGKDVKIYSDSGSGVINGNGQAWWDGFSGAEILDPNNKFYRPILFLTDNATNVEVSGLHLKDSPCWTTFLVRTKNVVFDNIYIDAVSTNASSLPKNTDGFDSLNVDGLTVTNTRVNVGDDCFSPKPNTTNIFVKNLWCNGTHGVSMGSIGQYPGVKDYISNAWIENVTLLNGQNGARLKAWAGPNVGYGYIDNITYKDIHIENTDAPVVLDQCYFNINETTCAAYPSNVNITNVNFINISGSSSGKNGKV…
KZM21208.1	>ST47_g7663	MRTAFAVTAFAAAAFAQSQSSSVDPFPQTTFLQQTNSLGVVTGQPAAATSIPSQPPVDTVIPTQPTVVTSQPAADTSVGIPASIPAVAPGIYTIPVAGNGNSTRTLVVSANNSTTIVLNQPTSGSAAASNSANPTGSGASGSGTGRPTGSPTGSSTASGTGAQSSAGAAANLKVAAGSMVGFGAFVAAFLIPSIPYAESKNPLQTLDIWLPRPLEQSDPKSTTWIVYIHGGAWRDPTQDSRCFEPTLSHLVASHTSTIQNIAGVASLNYRLSPYPSHPTSPSSPSDAARNATHPEHVRDVASALAFLRKEYAVKRWVGAGHSCGATLLLQLVSGIGLRDEDKAGVGAGPEGLVLLCGIYNVPLLLRNHDPPACPDDISRIYYEFVAGAFGEDREAYRRV…
KZM21221.1	>ST47_g7645	MLVSLISASLFLLSTPVLGSSTFEEKCLAFKPEKLVPGATRNVLEYVAAGTTLRFPDNVAACNRGSQAVTANVCRVALSIKTSERSNITFEAWLPEDWSGRFLATGNGGIDGCIKYEDLAYTSANKFAAVGSNNGKNGTDGLPFFNNPETVIDFAWRSLHTSAEAGKSLAKKLYGKSHSKSYYLGCSLGGRQGVKSAEKFPNDFDGIVAGAPAVDFNDLVSWRARFFTITGAIGSSDFIPPTAWKTWIHDEVLKQCDTIDKAQDGIIEDPTLCKFNPSTLLCIGNSTANCLSEPQVQQLKTIFSDFKAPDGRLIFPAMQPGSEVLSVDRLYAGVPFAYSDDWFKYVVYNDPSWNASEFGYDDVRAAERLNPGDIRTYPTDLPRFERRGGKLLTYHGQQD…
KZM21227.1	>ST47_g7643	MRQHFLTGVATVVLSSIVHAQLPPSPEDYWQVSPPINYSEPLYAGWPQLKVDAEVLVYRGTDVNRTYAHHPELYHNGKRTFLMYSTAPIDEDATGQDAWLSTSTDGGFSWSKGYPILPDALLPNQTSPANYTYWCDNRIWQRAHHPVAWVPIDKKTLYAVSQTTLRYCWGDDAKGTKAAGRIARVIDKAGNPVGDPCWTSQNNWTEVVRFNETIYGQYGMKFCKHAKQIEAYLKEPAKVPAWGTWLYQTKLFAAVGAHDMQEPTHSVWFGNKVGGYWERFWRDISGSDIISTAVWVEHTSSRKGDEWYPKVEKQLGNQIFKTNIPDVGSKQHLGLLPNGDRYLVHNPRNNTERYRQPLTIATSRRSNGCYTGIGVLRTNASTVIAPDTRKLKRLMFSYP…
KZM21235.1	>ST47_g7668	MLRPRDAFVCSLLVLGGASMVAPPSAASADALGETGSSDARAMQSGRKLTGRFLHITDFHPDPFYKTYSSTIAEAACHRHRGPAGVYGAETSGCDSPFSLINETFRWINDNVKDEIDFVIWTGDSARHDNDEKHVRTQKQIISQNEFLVDKFGEVFGVPDKDRRGINDYVIPIVPTFGNNDIMPHNIFLSGPNKWTMKYLDIWRSFIPEAQRHQFQQGGWFSVEVIPGKLAVISLNTIYFFTSNSGVDGCANKHEPGYEHMDWLRIQLKIMRDRGMKAILMGHVPPARVDGKESWDETCWQKYTLWVQQYRDVIVGSLYGHMNIDHFMLQDFEQIEDHTKKGDMAARARAKTTAGEIRLLEDGEITVASASDYLLSLRKFWARLPSPLAGSDRKSRVKS…
KZM21240.1	>ST47_g7611	MKLTSQLFVAGLAPFAHAFPAMMYEAAAADPTIEARAKELEKMLEARQAGADAATALFEPINTFNAEKQYINIEAGSGHEYVPPGSGDLRGPCPGLNAFANHNFIPHSGYATVQQYIDATTKVVGMGPQLALFLSVIGGAIDGDLLSWSIGGTPTIAQGGVTGVLGNGLVGSHNKYEGDASPTRPDLYEAGNNYKTVTSQFQDLINHSPGGQVTLDSLTAFRSDRFDTQIRNNPNFFMGPFSGVLVQPAAYTFIYRFMANHSAENPAGLLTYETIQSWFGVEGTNGNYNAVQGTERIPKNWYRRALEYPYETDYFLVDVLNAAKLHPKFLDIGGNTGTTNSFAGVDVANLTGGLFNSADLLKGNNLGCFVYQLSAQAKPDILLGALTKLTNAIGSIIGS…
KZM21241.1	>ST47_g7616	MKCIAFVSMVAATLAAADTPSSSSTAANPGKDRPPIGALWSSTWSASTLHPFVQSCHTQSVHRGKLHTLSRLYPELEEFAPQLKVFYNQQPYPGSWDGADPHGNERELLQMQMQHLPWKVREWIKRNATQRHYSVHDDVVFFAPGAIYPILPLWVEGEREGCEGVFDGLETYSNEPKDGSVIGKVSHTEDAEEAEFTVEALRVTLRDGAERSEL
KZM21247.1	>ST47_g7589	MKAFLLASIVGCTRVAAGALRVDDASSGVAYRGIERDGIQHFYGIPYGQDTSGENRFKPPRLYVPAAGSVVDATKPGIACPQPLGKSSPPLGQGNVTRVSEDCLNLNIVRPRLNDTSGHGKLPVMVWIHGGSFWWGSNMEPTFQPDGLVQQSVEGGNPVIHVAMNYRLGFFGFAQSDSLKQEGSENAGLRDQRLAIEWVRDNIELFGGDPENITIFGQSSGGLAIGMHILAYGGAKPLPFQRGIAESQSLEPGITGNFTRDAMSELVDYVACNTTDLQAPETIACLRGMDTEKLLNASLSTYASDISHNVGDIWLPVVDGDFLPAPPSQLIDQGRFGNATFMTGWTQDDLNFYTDISIATANDSYNFVRSYLPAIPETSLDTLLALYPVTQFAPPSGTN…
KZM21251.1	>ST47_g7581	MKLSLVASTVVATALAGAIPGDVHTDIHRRSAAPVCAFDEKTFTFDDTNAWATTSAKRDLSQKTWNPPSNLKTGLDQVWKHEIETYSNPLGFKNYGFDQVMAGKGKINYCVRWEGDATVSASQRTKVEAALKKQYNKWISVLANFEGFPYSTVDVKVVGWAVKNKSILVGDTKGIQVYTAVDSEGIPQCAESCGRFFHQDGNYAGCKAGADRHYDNSLWLTPGFNGGAGGDWGQRLEQGYFMENLDADNIHIFLHEVGHTFALDDFYDWTPSGVQNFIMLAGSAMEITEFDAWMARDWWRNLKSRYNL
KZM21252.1	>ST47_g7586	MYATQIVLTLGYFLTTTLSYPDHNTPKWTSLAPIPIPRQEHTTLYLAPSTIVVLGGIIPTHDNSTIPVRTTSLMQSYSIPNNTWTAAPAFPRAMNHINAAVVKGELYVLGGLADHETPPAWRSASDSFVYSTHTQKWSGIPGLRTGEARGSAAVGVYKDQMILAGGMTDLELFENGTQASVAVVSIFDTTLKRWLDLPRRAKYMPEGRDHAGAAVVDGKMYVLGGRNQGQENVKDTVFVLDLCDLKSGWKVRRARMPTPRGGVAAGTVGTKVYLFGGEGDKSTESGVFDQVEVYDTVKDKWESVGKMRIPRHGAYAVGVGNRVYVPGGGVMQSGKPVADFDVFET
KZM21254.1	>ST47_g7584	MKQTLLGGAALIGVAHALNYTCTPSAIQAALPEGASVNFAYPVAANSTFEVPKSDTGYPDSPPNLPALCAASVQIQSVGNTTFSFGIFLPEAWNGRFLAVGNGGFAGGINYADMAAGVRYGFAAISTGTGHNSTSGNGTWAYRQPDRVENWGHLAMHGSVVVGKEITAAYYKQNATYSYYSGCSTGGRQGLKEAEYYPEDFDGIVAGAPAWWTSHLQPWTARIALYNLPVTADYHIPVALYSTLNAEIIKQCDPQDGVVDNIISDPLGCNFQPTTLLCGSNSTANATSCFTEPQLDTVYNIFSDYVGENNTFIFPSFWLGSEGQPVFFSGNAPNPLGPQYVQYFLGKGPDWSFNDYNDEIITLSDAINPGNATVEFDLSRFHAKGGKILSYHGMADPLI…
KZM21283.1	>ST47_g7603	MHFSSIVASLALAGSVLAAPSTSKPKETSLYKAFRDRGRNFIGTALTIRDEPAEPKIIDQDFNSVTPENAMKWESTEPSRNNFTFAGGDQVVAFAKKYDQQIHCHTLVWHSQLPTWVSGGGFDNKTLISIMENHIKTVAGRWKESCTRWDVVNEALNEDGTYRKSVFLDTIGEAYIPIAFRLAAKYAKGSKLFYNDYNLEYNGAKTAGAARIVRLVQSYGVKIDGVGYQAHLASEATPTAPGAVPDQGTLEAALKATSSLGVDVAYTEIDVRMNTPATSEKLKVQAQAYERIARSCIAVKRCVGMTIWGISDKYSWIPGVFKTEGAALVWDEQYNKKPAYEGFLKGIREGRKG
KZM21284.1	>ST47_g7602	MKYILIASLLSSAVLAAPLAQQGNGNGNGNGRNQQGGTTQQQGGTTQQQGGNTQQQGGGQTQQQGAQNVNTGAGSNAPGANGQPPTSGDLATAVANWMADTSMVSSFLNNGASIQNNAAFKQAALVAYNAEVDELNHKAIIDAANSQQPNVQAANSTLATGGAFQDVVNKLQIMSVQGKAAANNIDLINQNRCTNVLPNIDAYMASTGSSSRAVRPQVCDQTGVAGGVQSQGPTQPGQAAGTPQAAFAAAQALQQGTGNGQLDLQTNGIPAAQAAAQAGNPAPQAGAATGQQNGNGANTGAAGNTGAQGATGATGQQTPGQQTPGQQTANGQQSANGQQSQGQQTANGQQSANGQQSANGQQSANGQQSANGQQSQGQQTANGQQSANGQQSQGQQTAN…
KZM21285.1	>ST47_g7605	MLSVTTATLLFWVFGSTALGRPLKDAPTNGSDGELLVTLPGYGSFQGTHVVANLLKTTTFSTPVDAWLGVDYSTQPVGEGRFKPVTWPAAFEGVKNATTYGPACWQNVYGSMLQSEACLNINVYRPSGVPMDQKLPVFVFLHGGSFVSGTGKSLDGAAFVAKSAQPLMVVTAQYRLGALGNIPSKLMQEEDGLNLGVRDQRQMLEFVQKYVEYFGGDKDQVTLGGLSAGGHSVGIHLFHNYGEDTGKPLFSKAIMASGSPTARTFPDVDYPLYQQQFADFMDYVNCPTTPNDAALACLRNAKVDDIQFVSSAIYSNSEYNLTWPWQPVSPGPLLEKRGSTSGEDGTFFKIPLLISSATDDGSAFAPQDLQTNAQFVAYWQNLVPGLTADDISDLQRLYP…
KZM21319.1	>ST47_g7535	MRFFEALAVATLTSSAAASAIPAAKLVGVLPREAEVVVPDKGHYDKREVVVPDKGHYDRREVVVPDKGHYDKREVVVPDKGHYDRREVVVPAXXXXXXXXXXXXXXXXXXXXXXXXXXXXXXXXXXXXXXXXXXXXXXXXXXRREVVVPDKGNYDRREVVVPDKGHYDRREVVVPDKGHYDRREVVVPDKGHYDRREVVVPDXGHYDRREVVVPDKGHYDRREVVVPDKGHYD
KZM21322.1	>ST47_g7538	MLFHLCALALLLTITTASLLASLIEPSVSHVRRQAAPLCSQYAYHAANGYEFNNNDWGRGSATSGSQCTTVDSTSSSGVKWPTTWNWQGGQNNLKSYANVGKQFSKGLIVGNIKSMLPRIQWDYQPRDGSSVDYELMVWLARIGCVYPIGNKVTTVNLAGFNWDLYVGPNGSMKVFSFIPADGSWKFSFNADIKVFLLPI
KZM21325.1	>ST47_g7528	MVSFRKLFVSAAALAVPVSAFLTPAQIVSTINVITTKSQALQVPAQSITLLNAPLIVVGLGPLPQIIFGFTDIVVTATGAIAQLPGTPTVLPGAPSDAIFDAFREFVRVHQVLLNILIGKAGLFNAVPFIGAPVSAALRQIEKVVDAIAFGLINLVQSRASDLQAQATSLKVTIDVAVDSYDGISLAKREMSRPLRYARREGSTPVAVAA
KZM21338.1	>ST47_g7503	MMKISPGRALKLFLKLLFCFSFVPPTVWLALPFTTVSVEERSTYIQNALASGQTVVTAWDAKPFIKTDEDALDEGWCSECTSVLFHWQFARVGDEVHLFLAPRHTDNEHRAFELRAHFKSASEWNQRASGGHNESWSPYFADLWSTPITLAGAREDKRISQGWFHEIDRHLIQHTLLGWTTKVDIRAVLPAPGRIEFWRGVAIDRASNHISDDWDEILNKNNVLQNHTQAVEVYNQMKRAERDVDLVAAFEAFEIADARNIVVKELKGDLPSRTWPFRKELLTWVPRFIVGPVMLFKAADDVLAPRFAGFLIFLMTFPLIYVGVVGCCWISAGGPNIARWVSRFWMTRYLVPHRLRRAPDTHQIWGASGPVDSVFDAGKSEG
KZM21340.1	>ST47_g7495	MKSALVLLAAAASVSAHSTWQQLWVGTTDQAGKCVRTVKDNSPIESLTSADMFCGRGPAKSDGLCEVAAGSPLTVELHAQPGDRSCANPAIGGAHYGPVLVYMAKVADAKTATTGSFFKVAEDGYKGTTPTWGTEILNANCGKRAFTVPNNIAAGNYLVRAEVLALHAGAGNPQPYVSCFQVKVTGGGSANPAGVSFPGAYKITDPIFSKAIYDSSFKYVSPGPAVYSG
KZM21351.1	>ST47_g7509	MQTFALLALTGFTSLVQSTPVAPAQPRSLPQARPHIQTRQANNSSSPACAQVSQAIYGDGTTVANQVVPAGIAWDCINSVPFNATSGKLLIESLKPYMEWQSTLTVLKNPPAEYVDKVQPAVDIMGGLDQIASDIDAGKFTNEYDFGWALYTLIQSAHDGHFSYVPDSVGGIFQWGRNVPLVSVSEDGEQLPAVFAFEDVLGLQYKNISYTPSAVVKIDNTETTEFLQTLSQLGSLQDRDALYNNVFYELAQVSLGESGSGTGMFTGGGRGRYVYPGATTTFSFANGTERTIQNYARARYDFRNVNTGEDLAKRWFSYGSAASAQAASQEAETVSTAASAATAPGYPDPVSLGPFNLINGYYIEDAGYADVAVLSIPNFVGSSSAGVPFQKTSQEFLAK…
KZM21352.1	>ST47_g7530	MRLIFLSLLYGVSVVRSAINPDGTQAVEPVTDDDASPIADMATYYPDLHDCPLECDDLTNTNGWITYFSMERLKRCNETMLLQFSITQLLDKSDSTILIRTCSLRSSNSIDATVRPELLTVENPKKDEKLYLPSLESAPACTAEGIKTKDLVHIVTGNGRSNSTSSSTSDIDGILDGIGKHFAAKDNCDELFVFAYH
KZM21354.1	>ST47_g7527	MKFLIVAAALAIPALAMPQPASEGSALGVRDNVKFNQYRNFEDCRNDNAILFHAAPVSGRCINIDSQTGAFFVNTAGFLASKLYSGGDCNGNTLGVSGGSCIERGQWNSFKLV
KZM21357.1	>ST47_g7510	MKLFLSLSAGLLSATLASAAVSTDGSCGGTSKFTCQGSSYGNCCSQYGWCGTSTAHCGTGCNSAFGTCTGSTPTTLKSSTQVATSTRTSAAPSSIPTKKVSTDATCGSGNGGATCLGSSFGNCCSGAGWCGSTTDYCESACQPGYGNCGTNNPSGTSSTKPSGTASASAIPSASGGVLQCLNGKNVPYKMTSDSDYAELIEPYNLARAFKPSVVVLPQTQQNVQDAVVCAAQNGIKVQAKSGGHSYASFSSGGKDGSMMISLQPFQKVELDASTGITKVGGGVRLGNLADGIYTQGQKALSHGTCPGVGIGGHFTHGGYGHTSRHWGLAMDSIVAADVVLADGSLIKASATENSDVFWGIRGAADSLGIVTNFYLQTQAAPSSITYFAFSFSTMYDSKA…
KZM21360.1	>ST47_g7515	MHLSSFIIALGACSALAAPVEQQPLPGNVRHHAGPHKVVNPYTPESRDPYDKKIDAQADKLHPLPWRNGDGADMLGPRNRERERQNPDLVRPPSTDHGNMPNMRWSFADSHIRIEEGGWTRQTTIRELPTSKELAGVNMRLDEGVIRELHWHKEAEWAYVLEGSVRITALDTEGGSFVDDLEKGDLWYFPSGHPHSLQGLSPNGTEFLLIFDDGNFSEDSTFLLTDWVARTPKSVLAENFRVAPEVFRAIPEKEKYIFQGSNPDSIEKEIPSKSPGYKKSKLQFTHKMLAQEPLNTTGGQVRITDSTNFPLSKTVAAAHLNIQPGALREMHWHPNADEWSFFIKGRARVTIFAAEGTARTFDYQAGDVGIVPRNMGHFIENLSDDEDVEVLEIFRADKF…
KZM21363.1	>ST47_g7518	MRVSAVIFTIAAAVAAQSSYTATGVGCEPHGDHWHCPAGVAEPTTAPAAEASVDTVSATASGVCEPHDDHWHCPSGVAEPTFAPSAASAFTTAVSGSITTAPSASASHSHDDEDDHSHAVTAATCEPHNDHWHCPSGVSEPTTAPAQTRSTSQVSNASGAGASASASAPVSQSTAAGSVVGASQQGVLAVVLGAVGAFFL
KZM21368.1	>ST47_g7475	MRSFQNVIVFLFALVACVVATTESYDTTVYLTSTVYRVNTVTMSGSPSSAVVNQTSTIYAPSASATYVASTATYVAPTATYVAPIVSYGTNSTSIKPTGSATKPTSAEFTGAASSFHANALVAALAAGVGYLVL
KZM21369.1	>ST47_g7472	MARFTQLAILLAAASLRNARAASFVKRQVPANATGVTTITSPQGAQIRYKQPGKHGICETTPGVDDYSGYISLNEKTNMFFWFFEARENPSEKPLTLWLNGGPGSDSLIGLFQEHGPCNVTEDLKTQLNPYSWNEHSNMLYLSQPVGVGFSYETTEVDDKGRYSLVDPDKANTTEAAAIGAWHILQAFLELSPQLDADIKNLTFNLWTESYGGHYGPGFYNYFYKQNEAIRNGSTKGVELHMDTLGIINGIIDEQIQAPYYPEFAVNNTYGILGIKAINDTIYTFMKQAFYIPGGCNDQIEYCKQSDRSTEDGQLTCSQAMNLCRSLVEQPFYEFGGRGVYDIRHAYHDPTPPGYFADFLNLASTQEALGVNINYTSTSSSQVFSGFSSTGDFVYSFID…
KZM21378.1	>ST47_g7485	MHKLIQLSILVPVGAVAAQDVDYAQFVNPFIGSEGAISGYAYGGGDVFVGGAVPFGMVKLGLDTYEEPINQSALNGGWTPQGYVTGISLMHESGTGGGPKYGFPAQMPLTEIDGDVNLLDNRTYWQKRVGEDIASVGYFRTELESGVTVELSASRHAGLHHYTYPSTSETHILVDFSHYLPHPTRSWDSQFYTGGEIEIQPNSSTYTGHTSVAGGWCIGAPVTVYVCGEFDTPPSETKVFKGKNTFPASRHFRSFNNATTPFPTFTGTTARSGPLNDRVGAIFSWSNVTEVNSRVGISFMSVDKACDYKNAELSTWSIEDTKQKARNEWNRDVFSKIRVDTSASANKTRLALLYSSLYFMHLIPSERVGENPLWESEEPYWDDFYTMWDLFRNQVSLWH…
KZM21380.1	>ST47_g7489	MPSLSLLFGFGFTLSSLASATKYTAQDTYAGSSFFDSFNFVTEEKTNGFVKYVDRSRAESQGYINYKDGDAIFGVDYKSKLDSSSGKDVGRESVRLEGKKEYNKGLFVLDVKHMPGGICGTWPAFWSLGREPWPVKGEIDIIEGVNMNSVNKFVLHTDTQCKTDGKGQTGAQSLYNCALDSPSGASGCDVNDVNTSTYGAGFNANVGGYYVTEWQADGIRMWFFPRGSAPKSLQTGEPDTSEFGTPNANFQGDCDIEKRFMDQRFIFTNTFCGDWAGNVYANSGCPMYSGLSGMDSCKKYVAENPAVFKDAYWRISSFKTYNKRMLSSSSSVAPSSTHASSSSVRVSSSTPVSSSVHISSSSVYASSSVQASSSSVQASSSSAHVSSSVAHISSALSSS…
KZM21389.1	>ST47_g7465	MAYIVSLLTAAGSLVGSAVAAASACPASAPLSCQSTGTIQNTCCTEAQGQILQVQFWDSSPATGPANSWTIHGLWPDNCDGTYKSTCDSSRAYTDISCTLKNRGATDILNYMETYWKDYQGNDESFCCYTNYQAEDELVDFLNTTITLFKDLPTYQWLSNAGIAPSSSKTYTNAAITSALKAKFGATPILTCTSGELNQIQYAFNTYGSVAHGNFVPVNPTGTSGNCPKTGIKYLPKDISTTPTADEGSCG
KZM21390.1	>ST47_g7464	MLFHSLFAVVLLLQSANARHSILRKPLELAATSHPALSSTGPLEVIQLYKPVSVPESTKCKVQQTLMEHTFASSYGVPYVGKYAPPNCIFNSVIIEWTVTVAGRQFDRLAEMYLGDIEVWRTSTAEPTASGIIYRYQKDLSMYLSLWKSSQDVIFSLNNVYDSTYTGAFNTTLVATFSYDSIGPAHADLILPISPKLGSSGAPSIFTLPGDNATIEHILPLNVTHASVSIAATGQSNEEFWYTNALQSNIHTFDSTVGTLIGYGPFREVRLFIDGLLAGVAWPFPTIFTGGIAPGFWHPIVGIDAYDLRDYEIDITPFLPYLLDGKPHSFTVKIVGISDNGGNGAGTLSEDDINSYWLVSGKLFLFYGSKPYNGKHQTPVISTSPLVSTASSFTASNGT…
KZM21394.1	>ST47_g7460	MPSTSAFFAVSVAVGCALARNVPAAAQVVDQRVFNVLASVPPPAIANDSTLFIWSGVTAESLLAKPFHIYDEEFYDVIGSNPSLTQIASSESDPIFHEAVTWHAARDEVFFVQNAGAPAAGTGLNKSSIIQKISLADAEKVRNGTLKAVPVTIVNTTNPQVINPNGGTNYKGNIIFAGEGQGSNIPSALYLMNPEAPYNTSTLINNYFGRQFNSLNDLTVSSKNGDLYFTDTLYGFLQDFRPVPGLRNQVYRYNFKTGAITVVADDFTLPNGITISPDGNKAYVTDTGIALGFYGRNLSSPASIYSFDVANDGTFQNRKTFAYMPSYIPDGVHTDSKGRVYAGAGDGVWVYNTSGKLIGKIYTGTTAANFQFAGKGRIVITGQTKLFYATVAASGAPIQ
KZM21398.1	>ST47_g7453	MFSKAIIATALISAVTAHQNFHQFWVNDETPGYQVGIRMPPSNSPVTDVKSDDMACNVGGSKVPSGVETVAAAEGDSIKVQWDQSGHLGPITHFLYGPVDDASQATGIGAGWFKIDELDQVDGKWANEIMGAANMTHEFKLPTGLASGEYLLRSEMLALHGAQTVGGAQFYIGCAQLKITGTGSKGACGPTISLPGAYKAEDDNIYIPNVYNGFDATKYTAPGGPVASCGAGSGGSAPIASSPSNGTAPATPTAPASAALSSAAATSVAAETPAVSSAAATSTAASTPAASATAPASGSALPEEFTLETFIAWLKEQAA
KZM21402.1	>ST47_g7458	MNFSIIVATLIAAVAAQASDDTCSAPITVTVTETLSYGIRTPSAPASLAVTAPAPYPTGSAALPPVVPTSAASTPLPSVASYGTASPSGTGAYSAPVSEFTGAAANLKVGGVVAGVGAGVGAFAALFL
KZM21418.1	>ST47_g7419	MKYLPPLTVAFLLLNTACADYASDAESAIKLLQDKWYNTETGLWDDMWWQSGNIVETIAKFGKQDEDFKQAAIDIVSNTYAKSGNQKGYKSWKNDFYDDEGWWAMGWIASYDLTGDTKYLDTAKDLFEDMTGGRTTPCKGGIWWSKPKEYIAIISNELFLAVGASLANRVAAEEKANYQNWAQMQWDWLYNSGIINSDKLINDGIDKTSCQNDGKTTWTYNQGVVLAGLSELARAKSDGGLIDHANDLARASMAKLSDTGILTEPAQHPLDQQGAMFKGAYVRGLSSLNKNKGQAAYAEFLKKNADSVLADARGGDGVIRDRWQGGSNGSNAASHAAGIDVLVAALQAST
KZM21431.1	>ST47_g7396	MRSINSLSWLSVLASLTTSIPAINAQNNSIEQWPLHDNGLNDVVQWDHYSFKVNGKRLFVFSGEIHYWRIPVPEIWEDLLEKIKAAGFTAFAFYGNWGYHSANNQTIDFETGAHDFTKLYEIAERVGLYVITRPGPYINAEVNAGGFPTWLTTGAYGKLRDDDPRYLAALDPYFSEFSKRAAEHGVTKGGNNLVYQIENEYGQQWKDRSKKIPDLPSGRYMDALEKSARANDIDVPLIHNDPNLNTKSWSKDYAPGALGNVDVAGLDSYPSCWSCNLDECTGTNGEYVAYQTINYYDHFLEVSPTQPSFFPEFQGGSYNPWGGPEGGCPGDIGADFANLFYRNLISQRSTALSLYMMFGGTNWGALACPVVATSYDYSSPISENRKIDSKYYETKNLAM…
KZM21432.1	>ST47_g7395	MPSLYLVAAIVFAVAGCLTKILLAGQQSPISKLPGTWHSKYTNLALRFHTMTGRRIFYVDDLHRKYGDVVRIAPGEVAVADISGVAQIHKIGSGFLKSDFYRNLTPTREPGIFAMQNPHDHAARRKLFARAFSNSSMKGNWEAEIRHKTTLAVDQIRKAAMQPGKGADVLKWWTLMATDIITHLNFGESFGMLEQGKQTAYIDALQAALLGGVLRAELPLVHAILRYLPVEGAQKIVNADEAAYEHGALAIHNMRNSQGNNMNLFGQMLAASDDYEKSALTDKAVRDEAGNLIVAGSDTTAVTLTYLVWAVLKDPELQARLEEEIAGLSDQLDLMELENSPLLNSVIEETLRLYGAAPGALPRIVPSQGMIVAGYQLPHGTEVSTQAYTLHRDSRIFQE…
KZM21446.1	>ST47_g7425	MHSLRGLTALRWLVLGFGAQRAMGVAVPTPTITPAPIVERQDPNAIELAKVLLTALPASLRQLAATNLPAVSTLLWHEFLDDNKPDWFRDLPENIQSYLIVEYGPSTAWPAASATSSAGSASSTASSSEPSSVAASATSSFASSPDSQPASSSGLTEGQKIGIGIGVPLGFLAVAAVLIPLCFACRKKKKKKVSGYEPPPSPGFMPHGAFQEKFTSYQEYRRPLNNPTLNRSQSWDQDDELWMSEASQHRAQAGMPAAPMGDSTIVVGPALVHTHSSNRARGKRTSYNSLHPVAEVGEPEDEYVAYKPHKRMVRRCSMALRPQYLPPTPASASIHRKPIPRVESPVTSPGADRTSGHFSLLRPALLDQNHSGSSSSQVAPTLSSRGDSRRSSDMTDATS…
KZM21456.1	>ST47_g7362	MRGLAFLANATCALFARTGLAAPAACPAPVVTTTSTSVPALSTIYQFPAGSGAWVENIAERSNGQLLVTRMFTPELWLIDPETGSAELVYSFPGANSVTGITPTGNNDEFAVAVGNVDAATFTPEAGSWSTWKLSMSEAEATATLITKLPEAKFLNGMGSFEAGESKGLLITDSVVGGIWAVDLATGANSLALQDDTMIAPAGAAFAVGIDGFRIKGDYLYYTVFAGGVLRRINVEYPSGADLAAGTATLKQIAVEELANTGGSFDDLDVAADGTVYVTTNPENTVVKFAAAGGKPTLVAGNAGSLALAGASSALLSKIAANVLYVTTSGGVAAPVNGTLSEAGKIMKIVL
KZM21464.1	>ST47_g7342	MRYQSLEAALLIAGSLLPAFSHALDLVRRQAAVNATYKDPSASIDDRVADLLSRMTIEEKTSQLIQGDISNWINTTTNAYNATGIAWNFEKRGGQFYVGYPVEQQWLAGGVKKGQDYILHNTTLGIPAFVQTEGIHGLLVGNATVFNSPIAHACSWDPELAHEMAVIIGKESQALGINQIFAPVVDLARELRYGRVEETYGEDHYLAGEFGYNYVKGVQSQKVAATVKHFAGFSAPEQGINTGPVHGGERELRTTWLPSFKRAIIDGGAFSIMGAYHSYDGIPSIADYLLQETILREEWGYEYSITSDAGATDRLCCTFKLCQCKTEDKPIDKEAVTLYALPNGNDVEMGGGSYSFEVIPQLVDAGKLDIETVDRAVARQLRAKFTLGLFEHPYNSLPA…
KZM21465.1	>ST47_g7343	MARTASIWVLTALSTGVLGNASPKANYTNTAVPQVPHPYWWEGPYTSSLVESAYKAPTSLPLPTLPSSEEEPCETTSSTSPPPLQSSELSGTHTAASYAPVSVTGSYETAISRVSSSSAVHEPSIPTIYASLPTYPTSVGVDSIASTWLPPSYTVAIPFYPSSSVTSTWLAPSYTVAVPLPPSSVAQATSSLQLSSSEYSPSASTAPSVSSSVPSYPGTTGLSTPTITSSSAYPTNTLSTLGSSNVSSSVAASTATIIIPVPPPQTSSYAPTTSPLSSQSPASSITPTSEASIASSLVASSSVTIVIPVPPPQASSLVSVSSGSEPSSAPTASSSTVPGSESTSTALETSTLSSPSLSTITTVTLPVSSQVLPTFSLDSSLISSAISSVPLSSVVVPQP…
KZM21482.1	>ST47_g7325	MYSLTLALFSISASFFLTATLALPQASCFAGVCYPYVRYGHPNYDEWAQHEVDKWREAERTRNNRNKNKDKHLHDRAEPAPPVDVSGVVTSDDKTDDELAGVYICEDNAWGGACTHTYSRLGSDPLDCTIIDGRASSIGPDPGYHCIFYTNSFCATLTTDRSETLTLSYPGSDNLGFTEQGDFNDRVLSYSCFKSDFSLDPVEGVKDVDKAKME
KZM21488.1	>ST47_g7337	MYIQFSIFITALAGLTTAGPVEVRQLGLGGTESTSKEFSQGGCKDILFAWARGSTEIGNMGTVVGPPTSNGLKKEFGANAVATEGINYAATVGTNVIPGGTDTASKKLMQDTLKSMAQKCPDSIIVAGGYSQGAAVNHRAIEELDASVQDQIAGVVLYGDTQKQQDRNQIPNFPADKVKIICQPGDAVCQGALVVLPAHLTYGSRADEGADFLIQQVKGAQAKIKARNAKREAEERITALAGKINKVAVALVA
KZM21493.1	>ST47_g7389	MRFSSSVVLALPVLAVAEQQIPLLDKVKSFFNQATASVASVIPSAPSAPSAPVEAAAAKAVAVVQHELTLENWKEVLTVDPTVSAPATQEWLIFVTGGNSTCYGFCGPAEKAWNASVPVIAAQPSSPKFGFIDCERESIFCNSWSVGAPSLLKFRIPKPLADQSAPVPEFRYKPLNRTSTTTETFKELVVDNQIDAIPPYEGLFHPFNGLLQQYGLAIPFGYATWGFSKMPSWLPMILISFFSRTFMSKRMNPGAAQQGGAAAPAPAR
KZM21495.1	>ST47_g7387	MAPLSIIGALSAFPLALAHMQMSSPSPLRDPHADRDEPKDYNILSPLNADGSNFACKGYHLNTPLTTVATYAAGSKQTLRLSGSATHGGGSCQIALSCDGGSSFHVMKSIIGGCPLSDHYEYTIPKDLPPAKKCLLSWTWFNKIGNREMYMNCAVVDITNKAMGKRDSQAAAAAALSRYPDLFVANLAGINSCKIQETTDVVFDNPGKQVSYGDGDSASMRPSFAKGQCTGKGSKDAGKGTTPSNSGSGGDGGGGSGQWTPPAKATSQQGSDCASKIASGKWYPECFGSSSRTNQQKQQPAQQQQDQQQQKVQQKPKPSQSAPKPDGKKSETKVQQDLDAYLASLYARGHVRRSMAPVANYAENYSPKNEYSAKAAVAKTHIHTENCKHKPSDYPPGSH…
KZM21512.1	>ST47_g7375	MKQSFALFAVVAGAATAQSLGSCAQMCVSNMNIIANTQFSCAAGDTACFCTQSNWAYGVRDCSSQACSGEESVQAISYAAGLCQVVASSATASATASATVPAALPILTSALASASGSTGTASGEASATGSSQSAITTVPLLATVTNSDGSVQTSTSGFSTVYSSGALTESAASAASSAASSVASELSSGLSSIAESASSALASVSESLASAAASATSAAGSAASSATSAAGSAASSIASAAASAASSAASSVPSQGAAPQITGVPVVAGLAAAAWFFI
KZM21516.1	>ST47_g7371	MIGVLLCVALLLRLAAAVDVTVDLGYARYRGKDIGNGVHRWAGMRYARSVSRVDGLRFTAPQEPLEELNKVTSDATKFGPLCIGTQSALAAEFGDKWSEDCLFVNVFAPSKATNTSKLPVYVFIQGGGFNMNGNANYDAADLIDAAGGDMVVVNFNYRVGPYGFLAGKEIEANKTLSLNNGLKDQRLLLKWVQKYIHEFGGNADHVTLGGASAGGGSVVLQLTAFGGRNDNLFHAVAAESAAFPPLRNVKQSQWQYNALLQRSGCHDLACLTSLDSVTFQNAVRSLKIPFPGGKNPPIYFWNPTLDYDFIQDYTYNALKYDRYVKVPTIFGDSTNEGINFTPKTISNYELARQFILDQFPTANWAKIRTVWNGQMNALADARWRGLASDVYGHIRYNCP…
KZM21528.1	>ST47_g7350	MKFTAAAALSVLGLAVANPVELTERQSCPKVYIFGARETTVAQSNGFGTASGLVNQVKAAYSGSGAEAIVYPACGGQASCGSVSYDNSQSQGTAAVIKAVTAYNQKCPSTQIVLIGYSQGGQIMDNAICGGAGATLTGNALKAVKVAIFMGDPHNRAGLPYNVGTCTAGGFAARPAGFQCAPASTSIIKSYCDAADPYCCNGNDANTHQQYVNKYGSQALAFIKSKLTA
KZM21530.1	>ST47_g7358	MLSLLFTTLSLLTLSTTALPFSNQAPPTAEQWTIPSLSMHMMTRYTGLPGSQPWPESTQFPSTIAFDVNMPNNHTAHCRAEWANGTLPDVGDSMGCTGEGPGRVRFRMREYTELGHRRPELGFVLSVWRDDRQPNQHTILMGETPVTANDPSEPSSYLTCLLGAPFDGLRCSIAGLMSVRRALVLEARVEEGGDGDVDTEKSALVTTSLER
KZM21550.1	>ST47_g7308	MVHYAILASALLSIAAAQSLGKGKEVHPKLTTYECTKKGGCKAQDSYIVLDAAVHSIHQKNDTTKGCGDWGKAADPTACPDEKTCAKNCILEPISNYADYGITTKGASLRMDFYGKDKKFQSPRAYLLAKGEKNYEMLKLTGKEFTFDVDVSKLPCGMNGALYLSEMRADGGRSSLNPAGAAYGTGYCDAQCFVTPFVNGVGNIDGSGVCCNEMDIWEANSRSTQIAPHTCSKPSLFKCQGAECGATGLCDKNGCGKNSYRNGVKDFYGLGLKIDTKKPFSVVTQFPAKNGVLQSIERKYIQNGIVFEDQPKNITMNDAYCSTQGADTFMKLGAMKGMGEALSRGMVLAMSVWWDEGGFMQWLDGGEAGPCDATEGDPKNIVKVQPAPSTTFSNIKWGE…
KZM21565.1	>ST47_g7321	MGLLFNVVLAVFAANGSFLFGYDSGVMTIVIQSPHFLDVFNTDAESNIIGAINATFSGGAVFGSLMGGFTMDSLGRRKTIMVGAIINLVGAILQSSAQNLAMILVGRIMAGWAVGVLSMSVPIYQSECLIVGISQQMIGIGFIVSTWVGYGSSKVPVTSSFSWRFPLAFQCVPCLMIIFGIMFFPESPRYLVETDRSDEALRVLHKLHYDGNNEDWINQEFNEIKLTIDAERAITAPGWAIMFKVKTWRTRLMHATLIQIFTQMTGINVIGYYSTIMYKNLGIEGDRNLLVTSIYNVVGPIFNLIFITFILDRVGRRKPLLVGTIGISIALICEAAVGSQVEGATGSRKNGLSAAGVFFLFLVSCIFSCSFGPISWVYASEIMPLSIRGRGSAFATGIG…
KZM21570.1	>ST47_g7312	MHFSTAVLSTILATACAHDVHERDLPPPVAVNDMSYTSCANAAWPPSTVGTELVPQKPDDDLKAMLDELSPENIENTITKLVSFGTRHTLSTQNSTTRGIGAARDWIASEMRKYANESSGRMTVTVPSYTQGVASRIPFPVKISNILATIKGSETPDKVYIMTGHYDSRVTDVLNYEADAPGANDDASGVAIAMELARILATRQPRSTIILGAVAGEEQNLYGSTFFANTLRNASVNVEGMLNCDIVGSSTGDRGQKDPFTIRAFAQGPPSYENATVAARRLQIGGENDSPARELARFSAEVAANSATGMNVAIIYRLDRFLRGGDHSPFLAAGYPAIRYTEPNENFAHQHQDVRTENGTVYGDLIEFVDFDFTARVGKVNLATLWSMSEAPGWPRNLT…
KZM21582.1	>ST47_g7219	MISLHKFAVSVLLILSVTFVFFAQTAEATKGPKITHKVYFDITHGDEELGRITIGLYGKTVPKTAENFRALATGEKGFGYEGSTFHRVINQFMIQGGDFTKGDGTGGKSIYGAKFPDENFKLKHTRKGLLSMANSGKDTNGSQFFITTVITSWLDGRHVVFGEVLDGYDVVDKIENVPKGSGDKPVKTVKIAKSGELEVPAEDLYGVAGDDGTELDVTTDQTTSAVDVATTPATSQGSKVPIPSIPGSALMEDGLSWGQKLFFVGAIVAVCVLFLRSRGGASSSGGFKQKSMA
KZM21613.1	>ST47_g7222	MQFSIVLAALAATASAQYAANSTSTSASGTGAVSVQPSGTGGSTPKPTGSTTPFTGGASQLTGSALGLIVAGGVALML
KZM21620.1	>ST47_g7260	MHLSFTAAVLAVAGSAIALPQNPAPAQGTSLPANVALPPALPVTDFKTPKFARPLSLDEALAGVNATVTTIVDNLQDLKNKLPELQLPSISPSLLPVTTRDLDEELAQFEKRQSTCSNPRIRREWDSYSNSDRQAYIDAIKCLQARPASGQFRQSQSRYEDLVALHQTLTPNVHGNAKFLLWHRYYLWTFEQMLRSDCGFNRELPWFDETRYAGRYTQSSVFSSQWFGSINVGGQCVTNGQFAGLAINIGPGSGNTRHCLARDNDDSETINTGSAIVDACNSRSTYADMASCAEGGAHAWGHNGIGAVMQDTYASPADPVFFLHHAFIDRNFRIWQNNGGNPRITTVSGTDAVGNRLTLDTTVNVYDFRPTVRIRDILNTQSSTLCYKYNY
KZM21622.1	>ST47_g7266	MPSLFRSGLLVLAIPRALAQSTNDVSAEYTSDDAFRKAVLDTTNLYRRQHDAGELGWNETLAETAGTWSSKCGFEHSGGPTGENLAAGYPNATAAISAWGEERKEYDFKKGEFSYGNHDLSWRPAHHADRKKHSSKTGHFTQLVWRNSTTVGCARTECNAKEGGGRGDAPGWYMVCEYHPAGNVLGQFTDNVLEQRSADQAPSAASGVRGSLGALWVGIAFALAGAL
KZM21631.1	>ST47_g7226	MKLLTLNFLTCAVKTCKTQASSFPLHPRDAELEIQESDINLPFLKNILPRLMWEELRTICKELGLPDLPPTPPTPADLVDSTSAAAETTVAPAAPGARVDEEPSQTARDLHRVLLETCIQEGKLVCGCCEHEYAVKEGVANFLLPGHLV
KZM21638.1	>ST47_g7243	MLSITLSVIGLLASAASASLQIVPGATWTATNTGQHIQAHGGGILKDGDKWYWVGEDKTNGNSFINVNCYSSTNLVEWKYEGALLSQTASGDTGPNRVIERPKVIYNKSTKKYVMWMHIDSGDYKEAKIGVATSNTVCGKYTYLRSEQPLGHQSRDSGVFVDDDDKAYLLTEDRQNGLRINALSSDYLTVQSNTYTFAEKYEAPAVIKKNGVYFMFASQLTGWNPNDNYYATAKSLAGPWSAWAKFADSGSNTYSSQTTFVLPIGDNFVYMGDRWVSSNLMRSTYVWLPLTISGTTATLKNSVNWILNPSTGASSSGPAETTYEGESATLSKNARVITCSTCSGGKAAGYIGGSDGGTVVFSNVQSDVAGKTSIRVKHLNGDKSQRTADVTVNGKTQRL…
KZM21639.1	>ST47_g7249	MKQVAASLIPLFLTLVAFPFAGAQRACNNAPELCSTPYDQITHLGAHDSPFLRDASTGFSSFGNQFFNSTVQLDAGVRLLTAQVHVASNADTQARELHLCHTTCGMFDVGLFKDWLWEIRSWMDLNPNEVITLVLVNMEGIDARELQGEYSKADIAHYGYVPADISKAPPPSSEFKKTWPTLGEMLDKGERLVTFVNAINPDKANAPYLLNEFDFVWENAYDVRDAVQFACKPDRPSNTTTIQQERDSGKLFLMNHMLYWSQAMNIQVPDIRNINETNSWDGIGGLGTHMTLCGGLVARQPTFVLVDFFNVGPAIKAVDNFNGVDAPVGRRNVTTQVIEGGAGMSYVSGSEKKKKGDAWVALVVALVGIVVCM
KZM21645.1	>ST47_g7245	MKSFAPLLVLAPFASAALTSMTQNDVTNGSGCKAMTVLFARGTTELGNMGTVAGPPFVSAIAKMMGGAQNLAVQGIEYPADIPGFLAGGDKAGSKLMATMVGKVMAACPKTALVMAGYSQGGQLVHNAATMLPADQAAFVKSAVIFGDPNNGDAVGSVGAANTKVICHNGDLICAGQSVILAPHLTYGRDARTAAAFVMSTAGAAAGKSAAAAAKVVAGSVAKSFSA
KZM21647.1	>ST47_g7247	MRSLAVLIILAAFLYVTSAVTYSPAAFLEFPGLPVCARVCRVILYTTNICAPPNVPVSNNATSIRCFCQSENLRSLYNIREMCNVHCDDKAMRKIENAYSSFCGLSQISVTSSAIPAPTRVLPPSTSSSVALTTCRSSTSILQPTQTSPPGAEELQVEHTSSQTWIQKSWKYVLTGILVLVIVLAIAVYALLRFIHYRRRQRPLSEAERYAELERALQEHLEESYGPRARGQIVPLKTMSPDNSIQGRLSRLPLGRMSRSKTPTNNPIISRRQRPQTHSVSAPTHLSRDLPPTAHEMWTPQRPASFRTTTSSIGQRSLSSPLVPVSPDLFRNIPYAQSFRYYAEEQAERERDLDIIRSISSGQCGTMTASFLLWRLPRGEKGGLLFGCYILAGFGGGYA…
KZM21667.1	>ST47_g7193	MFTHWLWILAVLTNVNSLPTQWRSATVKRGVTDLDKQYDYVVGTAGTTVADRLSEDGTNTVLMIEFGSLALDDSFMPPWNVPAPEFLYNLTSVPQPNVNNRTFPVINGRVVGGASAVNGQLHNRGSRHDYENWSKFAGNEGWDWDSIFPYFKRSSTFHEPTQEMKDFGMTYDLGAWGNSTPIHAAFPPYQYPGQRIQWKGWVEKEGVVVQKEHANGDAHGVFWVPTAMNPETGYNRSFAGIGHWLEVNFEQVEGLQKAVSVVVQPRYGDNTTFLVKAEREVILSAAATRTPQLLQLSGIGPHDVLQGAGVDVVVDLPGVGWNLQDHSFSMSQYNFTKDIWPNPAQINTNASFRNEAIAEYKENNTGPYAAYIVCSGIFLPGPAFLGNLTTSLVQQVEVQ…
KZM21673.1	>ST47_g7186	MKSILALAFGLLAVTAGQVTFQNSSQTILRTDSGSYGPEIEEVHYYYEQWPIGIAVSSTGRIFASYTRGNYTFTLGETVNKTTERPYPSASLNLPVSQLNTTWNGIMFGSGNSTGLISVQAVYITPASSQRPETLWVVDTGRPTIMDSSGAPTMPYAQPGGPKIIGINLANDTVYATYTFPSSVHFPDSYMNDIRFDLRTNATHSGQGVAYIVDSSDEGRPGFIMLDLGTGESWRRLTQHPSVLRVDRDVPSYQGRPFYQKTIGIPIQTLREGLDGLQLSPDGSRLYYSALTTNYLYSIPTANLLASPTDPLVEIAAASNVTNHGQRGGNANGFEGDSNGLIYQLMPEHNAIYYYNPEDLQTHPFVRDPRIIWPDGASIAADGYIYMNINQLPYQPMWN…
KZM21693.1	>ST47_g7058	MRLSLLSSIFMAGSCLAQGDIAALLKSQPDLSTLLELVGLVDGLADTLASASNITIFAPTNQAFLNVPRDVPEGEAIEYRNNTIAVGALLANHVFKGAYPSKLITNVPTFAQTLLDISYIDARQPFSNFTGGAYNGLVKNGDDVCVLSGEQTISTVTEADIKLGEGITIHKVDTVLAFGAPFQLFTYRAGYFAINAALEAAKLNIDFGLTGPDTASLNISDFTIFVPTDAAFDSIGSVLESADIDTLREVLSYHIIPNNVIFSPSLGNVTVPSLQGTNLTFTVLPDGSAWVNNARITFPNTILYNGVAHVIDSVLAPGEFDRATLKPSAPAPERVAFPNASTVSRMPLASASLAFGGDLMTYSTTPRLLKTVAAVATATSGASTTPTASQSAPIETFTG…
KZM21730.1	>ST47_g7050	MAGSAKYLLLVAIAILVLLPAKADAFGAGNIASISKIEGKNWRHGDIEDMLATVACIRGHKWKSMMIKRVYFGNWLRDYSQAVDTATLSKVQGETIRLLVWILAFMSFGYATGEFEVTAERLGTYRPEEHIDNPKDYADNQDARKFDPRLRGPVSEAELAVDPNTGMKNYIANEQGGWATSAGYVKYSFSRAIHFGRMYTHGPSGQCGREEDLCEALRCLGQGLHCLEDYGAHTNYTELVLRELGYNNVFAHVGTQASINLRGKHVFPLVTGTFGGVDFFHSVLGEATDHISSAEIDQMDTTLSDALTSNTKGGGPGALGGLTDILSKVPGTSGLIQEAQTLQASSDAQATANAGHGYRSGGYDSFGSRAGAQDQFGGAPTFDAPPGSVGGPPGPNIPG…
KZM21748.1	>ST47_g7047	MKGTTTWSLLLPLLSLTASAWPQPRHEKPPVCIIGAGPSGLSAAAKLEEKGIKAMIFDKQAEVGGKCQAWYDEQGTFHPLGAAFFSNATYTETLKILNATNVTSEPFQLAGAREMFRYNYTNGAIQANPALIPQFLASLSAEIPRYAALWNQRFQPISVAGYKNGVSDEFTVSGTQWFRQNNFTALPILLVNPVALYGYGDINIVPALYILQYFTPDILTAFIGLHEVYYMDFHKMFVEYSASQLCNTPIKTSAEVRCIDRSGKHPVIKYTEPCDSFYKWRKQECSSIIFAFPPNIENLERAGLDITEEEYNVFANVSTIQYYSSAVEFELPFGVSYIANTTSPALPPPNDGEPVAVLRLNEQSNVSVAWSWGPYEFQTESAARRLLIESLSEINKDPR…
KZM21765.1	>ST47_g7065	MKGILKLGGAVALSCFAIESAARAVGFQPDQWITPYKRDALQDIVTWDKDSIFVHGERIFLYSGEIHPYRLPVPDLYLDLFQKVKALGYNGVSFYVDWALLEGKPGEYREEGVFDLQPFFDAASEAGIYLIARPGPYINAESSGGGFPGWIQRVNGTLRTRAPDFLAATDNYMKNVGKKIASAQITNGGPIILVQPENEYTQATSAIKPFPDPEYMQYVIDQLHDAGVIVPLISNDASPKGYNAPIPTAPGYPAVVDIYGHDGYPLGFDCANPTVWPNNALPTNWHDLHLKQSPNTPYSILEFQAGSFDPWGGPGFDKCNILVNAEMERVFYKNLYSFGVTVLNLYMTYGGTNWGNLGHPGGYTSYDYAAIIREDRRVDREKYSEQKLQANFFKVSPAY…
KZM21770.1	>ST47_g7167	MKTFTVASIIALASVASAQLDNIPSCALTCFITPLTTDGCSGLTDFACHCKKGTELLATVQPCVQKACSAEDQATTISGVESTCAAAGVPIEIPDSSSAVSSAAASVTSAAASSAAASASSVISQASSAVESAASSLSSAIASGISSAQSVASSHAATATHSSNGTASATPSASQSQFTGAAAQATHAAGLLGAAALALFAL
KZM21775.1	>ST47_g7169	MRPSLLFAWVAVVAAQQDPIEDFCRRHQHQTCVIDDKLYIDGGKVFYGGSIENGSIAQQNTRLLWENVLATDNETEFPTQYKNLTKHSEVPSVSGGVLWPDITNKLFYLFGGEYNDVASVQPFTKLWYFDVVYNTWNQTSPSPTQSGISWPAFGSGIVTEGGTAYYYGGYLSNKTTPKWNSDPLMLSSLISFDMDTQTWSNQTYDSTSRAGGSLQYLPASASGILVYFGGIEGDSEGGVRYANMSEIRVFDINENKWFTQIASGDVPSPRRGVCAGVAWANDHSSYNIYVQGGVRDDVNTVRRSSQMIIIGGYYANASFTQCDVPKYYGQHGLLLGQESAEVAPPEVKWFWRLWSGYNKYRVPDKIVSLIGGNTDGHATRTMPLQGWTTPSPLGPYFQH…
KZM21776.1	>ST47_g7164	MRTSIASLLLAPLALAIPDTLAAFEPALEQLEQLPTSNNDTTPVDSIAELLKRQGNSCANNYYACTNLNAAGLCCPRTAVCSADRNNVVACCPQGAACTGTLGVSATGAVTASTTVPFVTASTTSGPFVQATTANAGSGGASTVSNAFYPFPYIATTYTNAAACSSAYTRCQSDAASCTNALMGGARGVTVSAPNGARLSITLAHQTSSPPPSRLLRSPTSMFNFSRAPRGGAAWFNAGPVSSYPNLTSDDGRLAQQHPCQDQYVSGCKVFHVPKEDASQAKEIRIDEWKEGEGDAKDQVMVFRYQGGFVAVNHECPHSSYPLSNGTPFDIEDFGVKLSAGITCPKHDWSFDLHTGRSDRGSYKLAVWETQLRKCDSGDGEEVWVRRKQRIG
KZM21790.1	>ST47_g7056	MRWRKASLLALPALASAHGSHHAHQEAFSQDRLDELEQKWGTDWGFSGISTFAHLPHTRCLTHPETAYDIAILGAPFDTAVSYRPGARFGPRAIRSGSARQTSFRGYNARAGLNPFTSWANIVDCGDIPITPFDNALALRQMSEAYLELAGRGPTEKSTESGVKYFNKPKVITLGGDHSVALPALRALNKAYGQPITVVHFDAHLDTWHPAKYPSAWIDPEDPTTQSFLNHGSMFWLASTEGLVANGSSVHAGLRTRLSGDDATDYEDDTNQGWMRISTDDIDDIGTKGIIDSIMGRVGTDMPVYLSIDIDVIDPGLAPATGTPEPGGWSTRELIRILRGIESLNVVGADIVEVSPAYDSSAEVTSVAAAQVVYEVLTSIVRKGLTEQARTGSVKSSEK…
KZM21803.1	>ST47_g7170	MSALNLSLIFTALVVFSNAAPTTDLDSASLSAANMAKRAGPCTFSGRIDLDKLVAGLPPCTSITFDSVIVPAGKTLDLSKLADKTTVNFKGTSSWDVQKGFAGPLLSIGGKDIVVTGEANAKLDGQGAKYWDGLGSNADVAKPKFFAAHNLLGASSINNLYLLNTPVQAVSINGCNGLTVSHMTIDNSAGDALPTSNAPHNTDGFDIGSSSNILIDHAIVHNQDDCVAVNSGTGITFQNGQCTGGHGLSVGSVDHGSTDDRNTVSNVKFLSSTITNSVNGIRVKSFYDGKGTIDKVTYSGITLKGISKYGILIEQNYDGGDLSKTHGPGTGVPISGLTIQNITGSGGVLSTGTDVAIECANCSGWTWSTVTVTGGKKFSCKGAPSVVPAGTCA
KZM21804.1	>ST47_g7175	MIFLSLLALFTGLACAQHARQTGPEIAAIRTYFYVGGDYSENSNRGYIFRDHMYVEKISPLAPKHDRASPTVLIHGQGQTGTNFLNKSDGEKSWTSHFLDAGHTIYIVDQTFRGQSAWAPRIGAQAPSTYPAKVIQQRFTSPERYDLWPQAKLHKQWPGTGTMGDLIFNTFYSNV
KZM21812.1	>ST47_g7048	MQLILLTAILAVTTAQQNPPDPIKDFCRRHQHQTCIIDSKLYIDGGKVFYGGSVESDSVAQQNTRLLWEDVRDTNNQYMFPTQYKNLSKDVNVPSVSGGALWPDTSNKLFYLFGGEYNEVTDVQTFTSLWLFDVIYNTWNKSSASDGSQAGISWPAFGAAAVSDVGIAYYYGGYLSNKTVPGWSDKPMMLNSLTSYDMNTRSWSNHTYDRTPRAEGLLHFLPASAAGMLVYFGGVETNLTGGISFANMSQIQLFDINDNKWYTQSASGEVPDPRRGACAGVIWAEDRSSYNFYVWGGVAANGSAFEEAYILTLPSFQWTRIHPAPPATVPNYGGKGWSSCDVIRNSQMIIMSGATTNRSIVECHVPNMGGQSGLLLGQESVEVENWWHAVRSDVNRYRV…
KZM21838.1	>ST47_g7014	MSGIEIAGLVLGCLPLLIQGIESYNEGLDPIKSFMRWDKELPQCIRKLRNQHVHYSQTIRILLEPITADVELAEMMTDPGSSQLWKDKDMAMKLQDRLQESYHAYQGTIGDIERITKQIASKLDLDRANELKRNDLEALLAANPKKGHDKFELTKRIRFGMSKKTIKALLEELNDCNRELERFTEKSEKIETYRKAAKPSFATRLQRMQGYARNVHTSLRWSCSCKTTHRTSLRLEARGNLYASGMKTFNPNRTCFTVSFSSLAAGADVPWAWQAAEINIEEDDASLSPVSLPKARMTKSVSFSSPPPYSLSDPVADPSQSMQEVKDLCASIQQLQTTTSRIGLSLDTKKKLRGVYTIDASEKLTPPSDLVSLEDLLDRRPTVNGRRAKLSKKERYSLA…
KZM21839.1	>ST47_g7016	MLLHLHLRLRLHLHLLLLLLLLRRRIAVLDTPLILTAHSVGSFFQSFWHTMTSNDRHASHDSPYRTGRHIPIPQSRHSALTSIATSGVDSRVDLSSSYAHDDIATSNGFIGSPKGPMSPSSPYSPGMRGSLSRQATADADTFDKGPNGEIQMQNFNEGLPPPPPVSHSWKRIDRWVEDHYEELFDNICEGATANDVNELEHDLDATLPMDIRESLQVHDGQERGGLPTGVLFGLMLLDCEEIVMEWKNWRKVAEEYLTSKPDYRSPQIPVKAFAGSSTAAPIAQPQTTGNPLWRQDLQARQDSQPPNAIQKAYAHPAWIPLARDWGGNYLATDLAPGPTGTWGQIIIFGRDYDCKFVVARSWAALVAMIADDMASNDVHIDEESGELKLLTFKKQNVEP…
KZM21870.1	>ST47_g6999	MMNPLFLSALPVAHALSSLLVNTSSGFVHGGIDAITPNVVQFLGIPYAEQPVGARRWLPSISKARDNERIFDATRFGPSCPQYDSNKPNTWSVDAPEFKIVPRDYQGEDCLSVNIWAPLQGDGACAPGVKGLPVIAWIHGGSFQTGGASTPYHIPSRWVERSRKHIVVGINYRLNIFGWPSAAGLNADEQNLGYLDQRLAVEWIRDNIANFGGDPDRITLWGHSAGSVSVDSYSFTYPHDPIVSGMIMSSGTAQSVVDFPPPNFTAVAENFRCNDSNSTAELACMRGVPSRDIMAYLKQRLDNGTTPSISFTPVTDNRTSWANFTTRALSGKFIHKPAIIGTTVNEWAPFLPYNRTLGPNQTVADNGTLRVFLCPSVLTTHERYAGGKATTFRYLYGGN…
KZM21874.1	>ST47_g6991	MKLTLTALLASALTGVFAVPTPTEQGPITARQAAGACATAVTLSGNPFAGRSIYANKFYSSEVVSAAASITDSALKAKATKVAQVGTYLWIDTRAKIASVEDAIKNVGCNQIAALVIYNLPGRDCAAKASNGELAVGQIDVYKTQYIDPIVAIIKKYPKVAISLIIEPDSLPNLVTNINLAPCQASAAGYREGVAYALKSLNLPNVAMYIDAGHGGWLGWNDNLKPGAQVLADAYIAAGKPKSLRGISTNVAGWNAFDLTPGEFSNTPDAQYNKGQNEKAYIELFAPYLKAAGMPSQAIVDTARNAVQGLRKEWGNWCNIKGAGFGVRPTTSTGSTLVDSFVWVKPGGESDGTSDSSATRYDSFCGKEESFKPSPEAGQWNQAYFEMLLQNAKPSF
KZM21877.1	>ST47_g6995	MRGVFQAAWLLPLAVGSALPTQEDTQFEKRSFDLVENVLAGLGSIKQDLMAGGAAINQQLYQATQQPAQYKKCNPTNVKVRQEWSTFSTSEKKAYISAVQCLAKLPPKTSKEVCPGCRNRYDDFVATHIQQSFNIHVTGNFLTWHRYFTWAYEQTLRNECGYKGNQPYYSHSRWSDPNKSPLLDGSDTSISGQGAPGCSNQTFTGIPLNTNPLIKVPHGAGGGCVTSGPFKQWQVNLGPLFPGSDCAPLNPNLNFTEPDYGLGYNPRCLTRDITSFTTQGWLKDDDIVSLLKSSDYQSFWETLQGGPPPNNFMNNFMGVHTAGHFILGGDPGGDFMASPGDPYFFFHHSSIDRIYWIWQNLKPAERTKALYGPTFMSDLTSPAATLQDKLTMRAAYPGD…
KZM21878.1	>ST47_g6997	MVMPKSRLVVLLGGLVAGHGLRRQITIDYTSAPLNLSTLANNSLYSTWRPRAHVLPSYGQIGDPCMHYTDPKTGLFHVGYLHEGASGATTGDLVTYDDLNLNSSPFIRPGGINDPVAVFDGSVIERGINGTPTLLYTSVSYLPIQWTVAYTKGSETQSLAIATDGGLNFTKLEHGPVIPSPPFAVNVTGFRDPFVFQSPQIDGLLKKANGTHYTIISGGVHSQGPSLFLYAEYGDEAGNFQTWEYLGQWWHEEANTTWTEDGWAGRWGFNFEVGNFFALSRDGFDPNGELFVTLGAEWSFDPIVPQVSDNREMLWVAGTQSLVNGSLRFEPTMAGRLDAGRSAYAAAGKAVLSTSQASQKSGAPDRFLTYLWLTGDFYGTLEFPKAQQNWTGSLLLPRE…
KZM21900.1	>ST47_g6937	MSRPLSLFSIQAILILAIDDGSRILTKYYSNPHPPQGNQGDYPGQIAYKTVKDQKAFEKGLLDKTAKQTTDIILYDQKVVVFKMESDVMLYVVGSAEENEILLYSVVLALRDSLNILLKNSVDKRTVIENYDLVSLAVDELVDDGIILETDPVIVASRVSKPPAQDMTSMKNIDLSEQGLMNMWDFGKRQLAERIRQGL
KZM21907.1	>ST47_g6928	MISTLALALQLLITLRTISASPLPHHHKHAKRVTKGQDVGSGFAIAICVVILAGVFYYLGMRHERTRLWFSRRSSSATSTPVENDSTTPEGHGMKTRISCPLAVSSSAPIKPCDSPVEAPTQSLRYFELPIKEIHEMGQPSPRKPPPRASWLSLDRKPWWLRYPDDEEQKRSARTSRSKSMRSWFKSDRSTENVQVEVPSPSPVQVEVIRVGADSMKEDDKERRSDGSTLMDWAGLDYVRRIYVGRKSRVGL
KZM21909.1	>ST47_g6922	MKFAAATTLFLATLALASPAPAPGPAVPETIPEFRAALTHLDARASKPKGSSGSSNTTNSAAVSVSASGALQLVVLGMGVVEAVRLWS
KZM21910.1	>ST47_g6921	MRFQLSFTLLALLGLSGAQCPLYQQYSSQVHEPFSTGTHNLSYARPIPSCRTFISQEVEDEIKRMKTVIADPDLFRLFENTWPSTLDTTIAWRGWSNTTVEETELGTSEEAPQELTFVITGDIYAMWLRDSANQLQAYVSLLKPDSGFNSLASLFRGAINLQARYILESPFCNAFQTPDESGVVRLSSMNSDRITPPFDYFKVFSCQWELDSVASFLQLSVDYATATKDYDFFKKGNWSRAVETILHTAESMTMDSYDELGNWQRTPYTYCAPYGGTPINECAGSPHKGHIGLIRSYHRPSDDACTYQYLIPSNMMFSAALNASSLIMQQVTPPASTSNLTTWMQQMSTGIRNGIEQHAIVNDPKFGKIYAYEIDGYGSANIMDDPNVPSLLSAPFLSY…
KZM21914.1	>ST47_g6925	MQYFTILALAAAAFAAPLEERQAGLCSSGSPLCCATSVLNLAILDCQTPPTTPTGINNFIDICAAEGQQAKCCLIPILEQALLCTDVQPQAAAPAVSAA
KZM21916.1	>ST47_g6958	MAPKRSLQCALLLSTTLGLAHAVSLPEPTAAPAKVEVRAPIVTPAAVRFDGKYSYVQKRDILEDIKNGVEGVAKSWGSVLGTDLPSFFTDGIPGWFENLPTGTDVMSSLGIGDDDLAVIPTQVLNVPPYANWTDQGWNVRLHGNVYKIPNISQSKIDDLANIFLIDTSVDKLPDDQKANARNLTRSIFIVQQGDENVTMTLEPAPMQGGDGEPGGGNAITAPGGNQTITLPYETTAEGDFDVFVPIKSNGLLNGNETENVQRLNVHTNGTDSGNATAFLVPPTGITFVSDIDDILRVTKIYDPKEGLLNSFARNFTQWMNMPDIYRNWSQSLPNNTHFHYLTTTPEQATRNYMDFIYKTYPGGSFDTRPLNFSDVKATLSIRMYLLQKVFQTFPQRKFV…
KZM21944.1	>ST47_g6947	MILLTSLCLLSSLVAAQMIGRYNASDDQNSSVISLVNGRIFTPGLAIIASPQPNTPMGGDFLHIALDISGDGALPFPPSSNPSASTRFHNVNLFLTSTTLDKNFTISNGTTSTPPLSNILEQETGSTVKHVNFEWPLCLVGNGKDAKGTARGAYNISIHQSFRLNGSDFYTIFNLPIEVTNNIEQFPGARQLLTYPKPGPLSANGGRMECGTLANKVRAEDELKGSVANPESQPFGDSGKLDVGNTGNGGGQSTGNGGGQSTGNGGGQIGGSSGGPSGGSNDGQGQIGLSVGSAVRVGVVWTMLLAALVACSQS
KZM21958.1	>ST47_g6882	MILPTCVIGLLAIPLVYAAPQAQNQTPSSTTGVTVTAGGTATGLASSPSSTASPDPLTTEETASLFQLHEDLVNIPSISDDEIECAEWLEEYLGEKGYYVERVPVTAGAEGRFNVFAYPQTIRDNGSWPEVLISSHIDTVPPFIPFKTREENGTTYHFGRGSVDAKGPIATMIIATEKFLASRDDSPSLGLLFVVGEETGGDGMRAFAEYASNTTFRAGIFGEPTEGKLATGHKGTLGLTLDVVGRSAHSAYPQLGLSAINYLSKAIVAMNSLEPALPRSELLGPSTLNVGIVRGGLANNVIAPNATAGVSIRIARSENGSVEIVRDMIAGMIQPIIQEVEERNGTFNATFSTAFYPAQILDTSVPGLEEAPVFYGTDIPLLPQVGQRYLYGTGTIEVA…
KZM21972.1	>ST47_g6890	MRLRQSLILLPALQLLARFTVAEIDGKQVARAAAPAYNNAVPDPSPTATPPGAVKGTKDAPVDGFDGKPHAGPYIDDTPTSHDKKPAVVEDLGTGKKTVAGSKDSTLVGAEAKVLDGDKSVMQDPDRKLATGKTGVEGGVSAKDKERLAHEDKTGSKKEQVPTSPKEAPPPPHGEQSHLKEAAATEIISTRVYGAVGLEKPTDLPDTPHDDAPHPVPDSLSKADPLDTTPKSKTPASSPPDEEAGGVIQPFHSFVLSFTMIIFSEIGDKTFLVAALMAMRHPRLVVFSAAFSALAVMTVLSAVLGHAVPAFLSERFTHLAAAILFLVFGVKLLREGLAMSPDDGVGEEMREVEEELEEKEQLARSKGRRRSSISPYALESGRARRSRSSSRLPAPARSP…
KZM21974.1	>ST47_g6855	MKLLFIAKLIWAMLLAKLGGAQNNKKCLALPGDADWPNAEVWSTLNETVNGKLVATVPIGSPCHDPTYDASACDALKAAWTNPLTHTVSSHSIMQAYFANQTCDPFSDRSIPCTLGNYVSYSVKVTDAWDIIAALEFAKAENVRILARNTGHDFLGRSTGAGALAVWTQGLKNITFGQWSDKYYTGPSVTVGAGVIGYELVEAANNQGLTVMSGECATVGLAGFTQGGGHSILSNQFGLAADQTLSFEVVTAEGELVTASPTENSDLYWALSGGGGGTYGIIVSLTVRAYESKTVGGAAMQLLASSTTPENYAAVTAKFVELLPAMIDAGAMVVFLISTQYLVIKPLTVWDSSAAKAKEILTPFSDYLVTLGITPPIAYSELSYRDHYDHYLGPLPQGS…
KZM21981.1	>ST47_g6861	MLSKAIFSTALLSALAAAAPKPQVAGYTDADASFSVEFPTGTPATSFGPDSQVAAQPTQPGSAPPRISADPTGATSHGPFSGTPTTTGAAKAPATLGAAIAPGPPNPTATYYNTDGSPQNPMLAPYTPAGGLGTNGSEPRYMVNSDFDYESIQLGLYQEWIELDLFNNGLAVFSDQDFIDAGLTAEDRAYIAFMAVQESGHATLLSNMLGETAAPQCTYDYPFRTVREFIDFNQKLTRWGESGVWGFINHLDSREVGQLLAQSIATEARQQMSFRQMLGLHPMPVWFETGIPQSWAWTYLAPYISSCPENTTRLAWANYPALHVVNQPNPNRFSPNDTKPYEVTGNRTGDPSDSTIPPDESCVNLNVTGYGCGPAISRNRSEPLSFPGKRVDLSWDAPG…
KZM22007.1	>ST47_g6850	MRFVLAAIIALPSVLAWDSKVCNGVGGCNTGTSFSEDPFRCPDGSRLNVQQTASNMNAVGSGDYTVVSKAEFPTTCLDGAKPGSSDTLVLHTTEFGQKAYVFIHESCTVTNPIVGDCYNHNPNPFSTTLCQLVDTKGKDCAKNTKADECEKWGTSC
KZM22008.1	>ST47_g6854	MDSSSTPLFATLCVIFIISVPVQFISPIITGAVSWIPKLAMSPSQPVNVTHPGDTPGWTYHRDYENSRFYEVMQALAHSSLATTANFSDSSRHISRRRIPSLQGFPANSSVQEVIMPYLNIESLEWLQSLDEILPHMDLFKNVTSNDTFKLSIIPSERMNPYFHGGDPGRVTIAFAEEWSLKGSYPAAKVVRGEHYVVVSTNGRQKCGDPKSDDPFGRLNGLYHLDARTGTSRFNNWHDPSCYVIARMEYSAGIVICRDCRLGTGGIVETTLQDESVVIADPLAEQALRMMPDVLALMSVSHSWRNWMQPGNLDDYTKGMLSVAYQASWNSMANVWSNDTTMRRTALSLPFPALTASITTWRVWTWLAMNCLLTVSGVIVAILQKQAFAKTVRNPELSL…
KZM22010.1	>ST47_g6845	MGRVYRHVLSTSLILAVVGALPAPVPQFGSIGSILQPGTNVLPAALPAALPAALLPALPEAFPADLLPALPEAFPADLTPALPEAFPADLTPALPEAFPADLLTDQPVAALPNANTGLLGGLVGGILKPADGLLTSAGDVIGTGVADLTGGLGGLISDAGETLGDASGLLGDTTDAGASGLGSAVGGLAGDLGDAAGAALGAVGNAVDTAGAGIGSLIDDVGATANDIAFGDGVPSASLPGASSPDLLDLLPGDGGLLGPNGIVPNQIGDVTDIIPDITSGNLGGIIPDVLGGIPGTGGDVTDILPDVASGNVGDIVPDLLGGLPNGGVPNTGGLPDPSTIIPGVTSDLSNVVPDITSGTLGNVIPDVLGGLPNTGGDLTDVLPDLVSGNLGDVVPDVL…
KZM22011.1	>ST47_g6846	MLFKRVSLLASAVWPASVFAAPAVGGGSHGNSTCRKTTVAVLGAGVAGITAAQALANQSITDFLIIEYNEQIGGRMRHTNFGSDSNGNPYLVELGANWISGTGTPDGPENPVWTFSKQSNLSSTFSNLSSIATYDETGAVDYMDILDEYDNSWSVFEQAAGRILTENLQDKSQRAGLSENGWKTQRDAKRKTVEWWMFDWDAAQTPEESSFVFATTAYNLTYYQFKDEDYFSIDQRGFNTWLKHEAAKFLQPNDRRLLFNTTVKGIEYSKSGVKINNEDGSCVEADYAICTFALGVLQEDVVEFTPKLPAWKESSIATFNMGTYTKIFLQFNETFWPTDKEFFLYAHPTTRGYYPQWQSLSMDGFFPGSNILMGTVVDEQSYRIEAQDDETTKAEVMEV…
KZM22022.1	>ST47_g6820	MRLTTIYSVLSVFLVGLTSAANSLPELPVSCPQIVPAPAPASLPSYFLPKPIKDSQLDDIETIRQTLHFYALVLDSKAFPLLDRVFAPSAVANYSGLAGILESLSVIQTFLQGSLAAYPKTQHLIANHIIDVCASKTAVSQTYFQATHFPNTTGGIFTAYVTHQDVWEKTKDGWRIVYSNFGITGRR
KZM22023.1	>ST47_g6821	MKYAFAQVAFGLGANAFVAREASQCIQLQASGGQSGVLGQLGDGQNRVGGGHPTGCYCLSSGGFTDSNGRGCILTPPTTQFQCDVGASPTTGFAVGSSGSVTYNGSSKFYACPATDTEYNVYTSPVAGQDKCVEISLSSAGSCGSGSAQSSAPAARPXXXXXXXXXXXXXXXXXXXXXXXXXXXXXSQPAPKPSQPAQSYPAQSAPAPKPSAPAPSAPAQSGNKCPTDLNGAYQYPHLIIPVDSQQPSKAFGTSYNGKVDSHTCSIFNFDIPTSYSGKTCSVLFLFPEQKDLETSSFTVSGSGKVDFTKLKSPASQQTTYANQPGKESDLASMSVAPGNSYAITSGDCAAGQTVSYEICSSGDFSLDYFQDYNPSPIGLYVRQC
KZM22027.1	>ST47_g6835	MRVHGLTLISLLISSAAAHEDSELLDCNTEDADVEKCAQKIDTVVAVTPGISYFTKIACKDCPYAKSFGGDLDDGHSEGKIAHGDQELFLNVTLANDTRSIFLNGKKIFPTLNTIPNPPHIAVASLHPDFSYKNLTTATSCSNPTCEGRHISDDCTEWCESLPLGRAFLDYSYAAHVQKEEPDAKIRFWEIVFDPVGGRSLPPAGHSGVSVPWEFDDPERKSLLIVVAGQPVKPGHKVKPHNSQDGGLFGSVGGADEVYELEITKVEQVVRRFNFAAPRLTVWGKIRRFFGADVWKEEGELVYLSDEWGVWGKKGTLRNLVGDVFHSNFVGLFFIIIGSVVGGFIALRIIQSLYLLVKQQSGLARWEGIDAVYSQLNQNRGAEEDEEGMFRGDYRDSYE…
KZM22028.1	>ST47_g6834	MLFSNILAAAALVSTAFAAPSNKETRANRKLKWFGINESGAEFGEKNIPGVYNKDYTWYDTKTIDQFISQGLNVFRLNFLMERLTPNTLTGAFDKAYLGNLTQQVNYITSKGAYVMIQPHNYGRFNGNVITDTAGFKTWWKNVAAQYKSNALVIFDTNNEYHDMDQTLVFNLNQASIDGIRAAGATKQYITPEGNSWTGAWTWISSGNGASLVKLKDPQNKLVYQMHQYLDTDGSGTSANCVSATIFKERLQAATKWLKDNKKQGFIGEFAGGNNAQCIAALQDGLAYLGKNSDVWVGAAWWAAGPWWADYIFSMEPTTGIAWVNILPKIKSYFMS
KZM22042.1	>ST47_g6773	MLFTILSLLVTVAKAQNSTIAEATQIAVYPPFPIRNGTNMQHIQRAYEVSFISAISTTTLVYAISCSPLTTMTRFNDVCGTSYVPNIITVTESPDEWHWSAQGKSLECTNLREKTKTCTSITNNYGSNIAPGTQDGSDFLAGFLEYFTTMTPVAVNLTAGFGNVPATVLESLENDATGLVNIQTSSLNGTSSRTEPTSTGVSAASLSATSPSGPTGISSSLPGGSIKSLFHVLFLFPSAALPVLLTLNSSFGTVKAPPLLTNFLLSSSSSKFSASVPNSSLTAADRSITLLKSPGLLPLLYILDPRRVSSHMQTIMTDQMKLKMDTMKRKM
KZM22046.1	>ST47_g6777	MRSFVASSLVLGLASAAVLPRTGHHSSEKHGSKHNHTKLNVQVGDRPYFLVNDMDEGALKEKLESCSEGPFKTSDFVFAHRGASLQYPEHTYAAYNAARRQGAGIIECDVAFTADKQLVCRHAQCDLHTTTNILNTTLASKCTTPFTPANGTTPASVKCCTSDLTLAEFHTLCGKQDGFNPNGTTVKQYMDGTPYFRTDLYASGCPKLMTLNEYIDTVDSWDLKFTAELKTPEVKMPFNGYTQEQYAQDMIDAFKAKNIAPERVWPQSFLPADIFYWIDNEPKFGAQAVYLDERVDTPAGYANATASLPALAERGVKIMAPAMFALTKVDNATGEIVPSEYAIAAKENDLELVAWSFERSGWLQIGGGGYYYDYVKSVVNNDGDMYKVLDVLARQVKIK…
KZM22084.1	>ST47_g6810	MRIAVAGTCRLALLIAQEIQGSTSHQVLILSRVDQTILISQGYQCQIVNYKSSSSLQHALMGVDTVISTVTGRLQLRLVEAAVQCRVRRFAPAEFEGQPGQRVSNSILDRGKTSALNLLHHYAANIQSTVFVCGNFYERFAVGGLRTHHVGANIASGEGDYIANLRNMTAVAPVYDAANNYSYVCLTSMYDVAKFVVRSLDMPHWPAEMSMCGERIGGNALIELIKTCRGRSFQYIDWQNPAGLQYQLSIAQRGDSINKQQQVATHLATAEGRYDFVTPTYLNTMFPDVPTTSLSAWLSRAWADIS
KZM22100.1	>ST47_g6699	MKVTQYLAGVALATSVANAASIPEVNAINLIDDHADVLPRSSEVVAPDHSLERRKGGGGRSGGSSSGGSSGGRSGGGSGGSSRTSSNSAAGGRTSAGSGAPRTYGGYYGGGASVPYTAGRSTPKGLVAAPLLLGVGLLAIMPGLWLYSAYPYHYSNPYRFYNQSETNQNNPNGTNTTLPVTCLCQEYSPCGCDENDDPKYINGLVGNGSYAALNKSLVTVADVNGTKNLVLNGTLPNGTTAPGGSDDDESAAINLKIGKYAGYWMMATIVLTGVMM
KZM22113.1	>ST47_g6736	MRASIAACAAFSSLLACTHAFYIPGFSYKSYRDGETIPLLVNKIYSDYSELQYAFSELPFVCPPTGRVRAGRFTSGTSITLNLGEVLRGDRIVVSDYELVMGNDEEARYLCSQTIDLEGIRRAKELIRDGYIAEWIVDNLPGASSFQTTDKSRKYYAAGFKIGDEVVPAHGGPADYLINNHVTLVIRYHRAPGKDGDKGKKVIVGFEVFPKSITASGRDESGLPAHIEGEHAALLLVHQANGTNSTDTEAEPTTLTIPYTYSVYWREDDRLEWHNRWDMYFVAQDDNANIHWLAIINSLVICGLLTAVVSVILTRTIRGDIRGHHDLGVRGIKSKSGRMSSSPKQEKKNLLGPMADLDTDGTSSDEEEIEDVTGWKLLHGDVFRAPAYGSLLAALIGSG…
KZM22133.1	>ST47_g6714	MASQPPQHFVILGAGIIGLTSSLVLANAHPGSTVTIIAKHFPGDRSIEYTSPWAGANWSSMANDNGLLEKYDEVTFNRFGQLMDGKSVHGCRVVKSGEGNEAGLGRQQMWAVLDAPIEETNLLTPETGKIWYDELVGGLRNLKKEELPEGAVFGLEFPSTFRINTQVYLQWLQSQALSKGIKLVRRQLSSVKELLASQPTTTLVLNASGLGALKLEDVKDTNMYPTRGQTVLVAEPKEPMKRMYEYERTYYRSPKRIDPTTTYVFPRTLGGGVILGGSREDNDWSNEWDSELEAQILQRSCALAPELGKPEDLQIISRNIGLRPSRKGGPRIEIEKEKKWSVPVVHAYGHSGAGYQASWGTAERVLELVQKALSPSAKL
KZM22167.1	>ST47_g6690	MLLQSLLVLGCAAFGLARSVPHKIARQEPSPTANAPAQSTICGDIIEAVNEGYQLFAASDAYECLTSVPFNSAVASRFIKYWNETLQFQSTLAYLKSPPEGYQQPAIDFVAELGRIQQRVEAGEYYNQYNFEADVQLLVLALKDGHVTLTAGVLAAFSFASPYEVVSASIDGKQAPKIYITDDLLPEYASEGWKPSAIATINGTEVNEFLTAYAALNSWGYVEPHAEWNDLMSHPTLDIQGGLTTFSGSGTFYPGDKLIFTFENGTSLDTIWLAVYNEPANATGPLTTGGDFYNYFVLGLLPASYEPTASESSESSDTPQAAPGNWSEASYGAFPEDPNIAQDDLGVYHSGLVTGYFYNDISTGVLSLPSFDAIPESIGNWADAVTYFIGNASDAGVTR…
KZM22195.1	>ST47_g6628	MQYIILALATAASFASAQSSVSTPSASASPTGAVVPVGGNCTPGITQCALGSSCYATNSMLQPRCGNFQATCTSDQQCAFNTCNLQQGLCNGFLSSSSSSSASSAPATITSTPAGGYSPAPSSTVTAPAGSLPIGAECNALANPSQCVAGVQCWASNSGLIARCGNFNAACSSNAQCAYNTCNNGLCNGFLPSSAGNVTMTVYPTGSSRPIGSATQTGSATATTSMAQFTGAASVVKVANGVIAVVFGAVAWVL
KZM22198.1	>ST47_g6689	MHTASQVFYLAVFSLLGGSHAVSHATSTTSKSPPPNVCNVSKKAPSPPPSGTHGDETKSTFQLEPGAIVSDACASYSTLEQLNEAIHPYLHSITQDTDFFSHYRLSLYSKKCPFWDDENGICGNVACAVNTLDNEEDIPLVWRAKELGKLEGPTAHHPGKKEQKEERKRPLHGSLGENVDESCVVEYDDECDERDYCVPDDAFAPAKGDYVSLVDNPERFTGYAGVGAQQVWEAIYRENCFSKPPKVASGQSTGRSAPLGGSPFGGFGNQQQMLAANQLRNAMKEGGLQQKVQSAIAHGTAVARLDPVEFDDTCLEKRVFHRVISGMHASISTHLCWDYLNQTTGQWGPNLACYEQRLHNYPERISNIYFNYALVMRAVGKIKQHIQDYSFCSEDPEQD…
KZM22199.1	>ST47_g6686	MKYTAALLAFAVGALAQSSVTSAPATTAVPGVSPSISCLQSCDPADVTCRASCLGIARPNSSQAVETTECAAKCDQGDGTAEATKKYSDCVQSCIASLFPSSQTGSQIPGAAASSGAATGTGTKSANPTASTGASGTGSSVSQTGSATPQATNAANSVSARIGGAGLAGLLAVFAL
KZM22234.1	>ST47_g6605	MTRTFLSVASAVLLLASVVNGVNVTRVDAKADAQIHLYPFNTFDCTEGPVGSPLELKQGECVNFHAAHSVKPMLRSDHQDWINEVNELRTNCKLETFRVPGCPDSGKMDQYLYGRSGDMPENFGRCLVGDHSSDDDSFSSAKFVCGKLENPELLCTSIIEHTSWSMDPTGSPSSSVITATYTGSLSATGRFARIIKPTHIGQGKPTLEPRFKTDQETKSVWMLHPWSKSMVCYLCYPEKKGDYSKIECRYGKDFPAQCGGNPVGGDGEVRTPMTTTTATTTATTTTHTTSTKLTVFSMSGRDDDDASMSDSESDFTDMDLDMSQKRSWHTPVKFGHPFVQGQHVCADAEWEKRGRPESYIKIQHCHICDHKDRGDSQWIGLPETAVDTVSKTTTTTNTI…
KZM22240.1	>ST47_g6609	MILTPSATLPNMLVALVTLLFSALVTAQGTGFTQSYCSSQNTATDDAFFWTYQSNGKCSDHCNSAGTYAFAVIQFTNCWCSNYIPSTTTDITSCQKDCPGYPDEKCGDKDADLYIYIKLSGQPSGTAGGGSQPSSTDATEPTTNNKPSSTLATVATSSAAEPSTNLVVVTESGAVVTRTVVYQPTQNAPQVQPTRKGSNNTGAIVGGVVGGVAAIAAIVGGIFFLLWRRKKQQRAEQEHQAGITRNTSTMSKAGLLGGRTVATDPHYPPPIATNLSSAGSRHDNESISPISGSQRRHSQPLMIDSRLNPETVLMYHPTFGNSSRESVGSIDDSRDYGRQLNVRNPDPH
KZM22255.1	>ST47_g6595	MRSFLLMAVMALLAFVSAMPITPSAPQLQKRAEQFRLEGLREFDIAERLSAPIVESDELEPLMSRVHSKLSALFESLANADEEEIDAEGDVAPGSMEAPQMLPKAAAHGSSLYQSLCALFHGGKDDYGYEGKELELRRPEGMKHWGGGR
KZM22263.1	>ST47_g6616	MRFLNAAALLTVPFLTQAAPVEDVKPSKGYQMGVFYVNWAIYARQHFVTDLPAEKLTKVTYAFANVNKTTGEVFLSDEWADLQFSYPGDVASNGTQLLGNFNQLYKLKQKNRKLKTTLSVGGWSYRGNFKTALATNATRYRFAESSLKLITDLGLDGLDIDWEYPEDSTDAANLVETVKLCRQLLNSYSAEHAQGYHFDIDISAPAGPLRYTVLPIAAMDPYVDDWNLMAFDYMGPGFSNFTGHLSNVHPSKSNPVTTDFNTVQAVDYYKKHISSPRKIILGMPMYGRSFANTNGLGQKFNGSGDGTWEAGVLDYKVLPLNGSTVYTDKKVIASWSYDNKTKQLVSFDTPEVQTLKAKYLKKEKLGGAWWWDSSSDRTDDKSLVGTVSKALGGPDGLKP…
KZM22272.1	>ST47_g6587	MRQGPLAALGLLLLAPLVSAAPQQPAYHDHRRPAQDASPNRTPPTWRRLSDAILRKIGSLPVHHTSRREGAGSTPQPATEPFVARYGDDVVLRFTMHTADEAKALAEASDVLFLDVWEFNEDWADIRVAKHVVPSLLGLLPPSLKQSHQPLMQDLDLAQAIFDSYPSSSATLSHQDDHAYAPHKTKGHPFLQDYQPLSVINPWMKLMASMFTTHVRRIVVGTTYQGRDIPALRVGVHPTNNDQPSGPRKTVLITGGSHAREWISTSTVNYVAWNLINAYGKDREITRLLEQFDFVLVPTLNPDGYVYSWESDRLWRKNRQPTSLRFCSGVDLDRSYAYKWDGDTVRTNPCSESYAGSEPFEGLEAQRFAEWAKNETEHNNILYPYSYSCTEEPPALEDL…
KZM22275.1	>ST47_g6580	MRFTSLSAFATLLLRCTFAVPYPLSNATDTTNTTFGTPSSGPYVCQRVYPSDLTIVNSRYPDYGVGHLHNTTLFFMLRRQILGEGEIATRVQFQGLPSAASNKTCRLEFVLPNEKLQKMQGTNPSFDIYQVQGDADAIATWNTYKGSEGVSLFGRINGESEALEKTRGVGGIAAVNETVCAETLTFQMGMAYDGGNLPNYWDFPNVAPPAWPIQGFRIVYGC
KZM22281.1	>ST47_g6548	MHFPSTLAFLSSALALALPTSAHGSLTGPSISPSLSTATTTTTDPYMNTETRTARSAKKTKTAFATVTRIMATSAYVTTSATASHLADPPCTKGECEEEGNGNGRTSATVEMGTEIHADTDLDASAAPTTTATTTTTRPSSSRAISRLTRAANSTGRLGAMGIVSVNNAAMGTLDTAVTGGVPGGSFKPTAPDRESSAWDAERTSLLSTTPPATATAAAAAAAAGGTTTSRSASHAAGGDGDGWGLGGFEWPGFGAAETTPSTSAATSIAPASAATLTTHPGDGIAWSGTDNAIRLQLHDRALLGPGGMGKGELRRGLRRHGGNGGDVRQRECRVCGTEGKVLCRGDVAVGVCEEGCLVMKMLGRGRGNGCEDE
KZM22291.1	>ST47_g6564	MRWLLSFVVLAIAAVVKAASFTGNRLLVVLDEQAEREKYSVFLEDLTARGFHTTVESPKGDKVALFKHDERTYDHVLLLPAKSKGLGPALTANSLLEFVKKDGNILVALSSEQATPTAVQSLLLELDINIPSDKGALIVDHFNYDSVSAADKHDVLLLPFPAALRSGVQNYFGGEGHIAVPRAVGQVLGNDSPLLSPILRAPSTAYSYNPKDEAEAVEDPFAVGQQLSIVSAIQAHNSARLTVLGSAELLQNKWFAEKAKLGDKAVTTANREFATKLSAWAFKETGVLKVGKVIHYQDDGASKKLNSSIPESNPTIYRVKSDVHYQVEISEYSNDRLIPFVPAVNDNIQLEFSMLSPFHRLNLSPISQTANSTVFGVAFKTPDQHGIFNFRVNYRRPFV…
KZM22296.1	>ST47_g6554	MGSTLKVFHALSILSLVTPGINAAPAGAKLELKAFKNVENKIYKRQDAGGLLDTCSYCPVIRRLSSYLPEEVQEQADNLNNQLRDLIAAVGPQLPGGIPALDSLLNPQQGGLPTDILGGGLSGLGGLPIVGGLTSALPTNILGDLPVPTDILGGILPGAGQGGLPTDILGGLATGLPTDILGGLATGLPTDVLGGLVPTDVLGGLLPTDILGGLATGLPTGLPTDILGGLVPTDILDGLATGLPTGLPTDILGGLVPTDVLGGLVPTDILGGLATGLPTGLPTDILGDLVPTDVLGGLVPTNVLGLPTDILGGLVPTDVLGGLATGLPTDVLGALATGLPTDILGGLVPTDVLGDLATGLPTDILGGLATGLPTDILGGLVPTDVLGGLTAGLPTGLPT…
KZM22316.1	>ST47_g6573	MRYSIILGAAALVAASPAPQAFDPNGLDAVATLTQGPPVGVGPAQETAYQPGAAQSQAAAAATATAIAQSAKRSINEKSLKARTFWWSWHSLKQISPAPAPVPSVTSTTSTSTVVPTTTSAPVVAAQTTKAPSTTDGVVPSSCTPVSWTNTYAFTSDSACPTAIEVGTYCGFINPDDPCAPQPAGKGVPPTDDTVNGFLNNDAYKQLAVGAQTPSGYMQSFVNLQGATTGNGYLSYKTLDSYDVATCSKFCDDSDTCTGFNIYIERDPKWNPHQCSCDNPPSTINYKCSIWGQKLTKDTATNTGSGRDSFQVVITGSNGYNKATYTPPTPPSCSRPQNCGKKLLNQAPYCMGQKTFPGPFDPSLCAAYAQAQNAINRKFGIIGAFLSLFGMNKGACIQF…
KZM22323.1	>ST47_g6537	MRWFQVLTASLLPFTALAAKKTGDKYTDARAKSLEIGRPLKLDDGGYASLTKGQRDFSVAVLLTALETRFACVLCREFQPEWDLLGKTWIKGDKEGKTRTLFGTLDFIDGKNTFQSLQLKTAPVLLFFPPTVGPNAKVDAQPVRYDFTSGSQSAEQIHAWVSRHLPADVPKPKISRPINWVKIISVTTAVLGGITVIAIASPYILPLLQNRNLWAAFSLITVLLFTSGHMFNHIRKTPYVQGNGKGGISYFAGGFSNQFGLESQIVAAIYGVLAFATISLAIKVPRIADSRTQQFAVFLWSGVLLCMYSFLLSVFRQKNGGYQFWLPPF
KZM22347.1	>ST47_g6506	MHISSLLSLPSTVILLLCATPIATASQQWPHNLPKHMKYFPEDERHVKRGLDIRERLQNEKPVGMKKMSTDEGEMFMLDNWIFASSQSKRSERGDSGNGTHQAEPAIRPNAEDEWIERLRIRDVLLKRQFKCPEGTNSCSSIGAPDVCCGTGSTCVNVQNTDIGSVGCCPQGQTCSGTISCNEAAGYTSCPNSSNGGCCLPGFQCSGVGCVAAGTSITYVQPSTSAQPSSSSTSTVVAVPTSASTSAMPTITSTPTSTPAPSSSPTSAYTCSNGWFSCPVSLGGGCCQNGRECATGASCLGDDPSSTQAPSAPVRPTSEATTAITSTASEGDVCPTGFYVCSAYYPSGCCRVGRDCQTTGSCILPSSTTVIATNGVTVLAPSGATVATGAAQSGSCPSA…
KZM22351.1	>ST47_g6510	MRTRTALAKVCLLASLLVATYHIRCQYIFQRALSNLYITFDDFPQSYTTALNASRTEGDALIDLDYNASFASPRIPRIIHFIYFANLYHLHDGSPTLPTTSRSHAPELCRKFNPTYTIRIWNETEAQSFIEEEYAWFLPTYSAYKHPIQRVDALKYFALYHFGGVYMDLDIACRRPLDPLLQFPAWFPEASPLGVNNDLMASMPRHPILLDMTSALAWRNQNLLFPYLTIFWSTGPQFASDVLKAWRWKYGARMGGHDTASFRVLPQMFYSEDYTFFGHSPGGTWHGGDVAAVLWLVDRPDYERHEASENKVDYESANKKSIAGLTLHRLPMFESVMYACWTNLMLDDPNQMDELLHYSRDNELQRLLRLLVEVHLDIDDYLEESVPDSLGACSNCAGG…
KZM22353.1	>ST47_g6501	MISKAILITALIAYVEARFGQEQLPIQAISAVQGGDPGAASTVAGAAVSDLLGGANSCAKLQRADQVVSELGGGADAIAAAIGLVTAEKNTNPFANNNVQNVCGDPSLPATAELRGITPLIDPDVDVNGDAAALSKSSAANPLAADGLSVFDLMSQAGLGDLVVSQTAAGGAAAGGAAGGAAGANNQQANNGQDQNQGQANGNGNGNNDSNNSNQQQAAGNADNQQANGNQNTNQNQNQNQNQNQDQNQNQNQSGNNNNNNNNNQQASGNGNSEQNSNAGGSASCNAGNAGQNATESANQNQNAGNANQNQNQNAGGSNATADVGTGAAAGGASSVAGADFGQCTPTIIFEGGANGRPANEFTFQIADPVARGGQGEALNPNIITNALCNQLTNVCDAN…
KZM22368.1	>ST47_g6479	MYPSTFLQSLLLGVPFISITCAQSVYDSVTDPTKRAEFALSTLQIWYNAGTGLWDTAGWWNSANVMTIIANLAKSDPKNAQLQNLATRVFANTLLQAPAKNPQPGVESEAKRRRDVDPGNGTFTLLLNETGTESGYSKNLNPDTSEPHTTFPTGWDAEDGQYIDIQSLPSFASESKDAATQVALATAPNPEDWLDGFYDDDLWWALAWIGAYDVTQNIQYLQPAEGIFGQVTKAWPTRCGNGGIFWSWKKDYMNAIANELFLSTAAHLANRAENRDTYVEWAELTLNWFLNSGMINEQGTINDGLTEGCKNNGYTTWSYNQGVILGGLVELNKASPNDTYLPLASRIAKAALVKLSDDNGVIHDGCEPGCGGDGSQFKGIFMRNLQLLHEATPDDTFAD…
KZM22374.1	>ST47_g6484	MHITYLSVLVALLGPSEAFFRMSCPGRLVRERLDPIINPGGVASHVHTISGGVAFAPTMTYQDMQAAKCSTCTIKEDMSNYWTPQLYVKFKNGTFMPVPTVGDPEDMHGGMTVYYLQRRGDDSNEKLHAFPEGFRMIAGDTFARSFGNDSAAKAISFACLGGPNLPETNNMPDFNCPGGLRAQVFFPACWNGKDIDTPDHKSHMSYPVGQEYNNGACPPEYPVHMISIFYEVLYDTAPFLEHWNGDQHPFVFANGDATGFGYHGDFVNGWDVSVLQNAVDTCTDDSGQVERCSAVTQFTPDECAACRLPEAVNEVNDGHLDKLPGCNPVTYGPDRAAPTQCNDGVSLGVRKVDYVDVTQTKGWAYVGCGKDNIGDRAFTGVSFSRPNTTVEDCIDFCTA…
KZM22386.1	>ST47_g6427	MKFSILTIVPLAALAAAFPSPQNADRPVATGSCCVANTSLKQDVCNVNGQSGRCVPSAANNCLFPYLDMAGVRRLTNLTGGGQLTCIEDNRLQCDANTLKRGRPLCRLASEFGKIN
KZM22387.1	>ST47_g6431	MRLQSSLLSLAAATTVSLASPLLTYQADQKVGYLFTNFPVNDEQVYMHLSVDNDALSYRQLSYDGTLETARILESTIGTTGVRDHFIINAQDSSKYWLHATDLKVNALGGDFINATRFGSRSIVVWESTDLATWSEPRLSAPLANVSAGNVWAPESYWDHTRNEYIVIFSSRYWDPADVERTGPSPPNKLMYVTTKDFETFSKEQVYFDPGYPVIDCSLIPVPEQGENVWYRWVKSEVDYRIWQQRSSDGILGTWSNVGDAPDGTRVTFADRYSNNEGQLCFRDNQDPGLFHLWIDQSSTETYIPAQARTLDDMAAWQLSDTTSFTKNTKHGWVFPLNQQQYETIQAKYKFI
KZM22388.1	>ST47_g6430	MPSQSSYLRPGVLALGLAATSSFVAAAPCDIYASGNTPCIAAHSTTRALYSAYTGALYQVKRGSDNTTINIAPKSAGSVANAAAQDTFCSGTTCLITIVYDQSGRENHLTQAPPGGFNGPESKGYDNLAGAIGAPVTLNGQKAYGVFVSPGTGYRNNKVSGSATGDAAQGMYAVLDGTHYNGACCFDYGNAETNNLDTGDGHMEAIYYGDSTGWGSGAGSGPWIMADLENGLFSGQGAKKNTGNPSITSRFVTAVIKGGPGKWAIRGGNGATGALSTFYSGARPSGSGYNPMHKEGAIVLGIGGDNSNGAQGTFYEGVMTSGYPTDATENSVQANIVAAKYATTSLVSGPAYTVGDSVSFKATTAGYTNRYLAHTGATVNIQVVSSSSTTTLKQAASWI…
KZM22390.1	>ST47_g6432	MKYIAVALALATAVAGHGYVNNATIGNKPYTFYQPYQDPYTSPAPQRISREVQGNGPITDVTSADLQCGGYTEGGIVGSKPAALHAEVAAGSAVDLYWTLWPDSHVGPTVTYMAKCPDAGCNNWMPSATAVWFKVQQTGRTGTSNTWGATPLMKAGGVVTYTVPKCIPSGNYLVRHEIIALHSAYSYPGAQFYPGCHQLKVTGGGSKSPSGLVAFPGAYKGSDAGITYDSYKAQAYTVPGPALFTC
KZM22412.1	>ST47_g6454	MKLSTFLITVFAAAAVAEPCTSKAPVSTPTERVEMCTKICAFRPIQDCGRGGYTKQQGKCWSCCKK
KZM22417.1	>ST47_g6459	MRLTLLSFLPATLALPAILQSRADEPVYWLLAGDSTTATNGGWGDAFLATTVAEGSSGVNYGHSGSTTKSFRAGGDWDKVINEIGSNKEDYRVYVTLQWGHNDQKPTSGVTITDYKTNLATFASEASSAGATPILVTPLTRRTFSGGKVVENLVNETAAVIEVAEANSLHWINLNEASTKYVNAIGSAAADKYNLASGDRTHVNEWGGVVFARIMSDLLVGKYPEEFESVTKKNETLTALIAAGTVA
KZM22420.1	>ST47_g6447	MFGKAAILNALVSAVSAGTILWDGRFNDFTSSSDLNKWSWANQVGPYQYYIHGSGPVTSYVNLSPSYKNAGDTNSKQGAKITIDSTAKWNSDMWRTELIPQTKAAINSGTVYYHFSIKRGSTNVPSATNEHQICFFESHFTELKYGWISGEQGTSNTNLQWMVGGQSKWKVELKADEWHNVVYEINFSSQQVTFWHSTGNNTLVKTAGPFSASTSSNGADWHLGVLRLPRQGNDGTGAEDWYFSGVYVESGSLTTSIVSPK
KZM22422.1	>ST47_g6423	MRFTSYATASALAALASAQTFTDCNPMEKACPNNPAMPQTWETDFTAGKDAIKGWKQTAGSLTYSAEGAEFSVAKKGDAPTIGSEAYLHFGYIEVKMKAAPGQGIISSIVLQSDDLDEVDWEWIGGVDSKTQMNYFGKGNTTTYDRMIEADVSSTQNEFHTYALNWTSESLTWIIDNKPMRTLNYADANGGKNFPQTPCNVRLGNWPGGDSENEGTRQWAGGEVDYSKAPFKMTVANIKVINYSPGTEYHWKDKSGSFESIEVVGAGNKDGAPQNNAVLESSASATGSGIPLESGFAAPSATGSVGSGNSGSNNSSTTCTEGQQQATPAPASGGNSDFNYPVPTGSAGTGDETPCSCGVATVTVTGTPPSGDAPPATETPSAPASSPVEGGTATPPTST…
KZM22427.1	>ST47_g6428	MHLNLRTIGAGLALLMAVVSGSSPFGSLRSRAETFENPVIWQDYPDLDVFRVGDVFYYSSSTFAFSPGAPVLKSYDLVNWAPVSHSVPRLNFGPRYDLNNATDRAYVQGIWASTLQYRESTDTFYWMGCIADGPTYVWTASGTNAAANNGEVEHWNWTSQGTLPRCYYDNGLLIDDDDTMYMAYGKTTINVAQLNADGTAEVKTEPVYTSPDEVYIEGSRMYKINGTYYIWVTKPADDEYVLKSDNVWGPYERRVLVDSIEGPLSSAGNAHQGGIVSTKDGQWYYVAFLDAYPGGRIPVVAPLTWTEDGWPQVVRVNNEWGKTYPIPVHTNKTVPATTGVDSFHGSSLSHEWEWNHNPDDSAWSLDKGLQLQTATVTDDLFTARNTLTRRIPGPKSAGT…
KZM22454.1	>ST47_g6360	MGAALSLPFLALPAMGTVWSVAASCCGAATCSAVMGSCGGKCGNSIATRIAYALILLVNSIVSWIMLTDWAMKKLSKLTLDYVDIKCHGEQCYGFVAVQRINFALGLFHVIMALMLVGVRSSKDGRAPIQNGFWAPKILGWIAMIVLTFFIPNSFFIVWGNYFAMAGACLFLLVGLILLVDLAHNWAEYCQEKIEPSESNMWTGLLVGSALFMYLASFAMTVVMYIYFAKSGCGMNQAAITINLLLLLITSVISIHPAVQNVNPRAGLAQSAIVAIYCTYLTLSAVGMEPDDHQCNPLIRARGTRKATIIIGAIVTFVTVAYTTTRAATYGLALGAQGNSYGNGYSQVGADDYEHGLVTQQPESRRDMRQAALRAAVESGSLPASALDDSDSEDEDDSP…
KZM22467.1	>ST47_g6389	MLQTLSLSALLLLTRVLASPFSRPSSDPLPLLIWHGLGDNYAADGLAEVASLAEVANPGTYVYIIRLDEDASSDRTATFLGNVTEQIATVCADIKADPILSSAPGVNALGFSQGGQFLRGLAERCGGDNGVKIKNLVTFGSQHNGIAKYQICKPTDWLCKGYIGLLKANTWGAWVQGHLVPAQYFKAIDEQTGEPTEEYLTNSNFIADINNERALKNVTYAQNLAQLDNFVMYVFGNDTTVIPKETAWFAQTNLTSGEVVELRDRDIYKEDWIGLKKLDKKGGLHFKTTEGEHMTLGDKLLKQVFREWFAPPKESWREVVQEMIEL
KZM22473.1	>ST47_g6349	MFSKALLLATPALAVPTFFSDQAQAPIQPLDHSQGYTFDPLLHLPGISPYFDAVGFGLEHTAPPGCNVTAASYIIRHGAIYANDAEYEEFIKPFLWKLEKHRHGQWLGPLAFMAKWQSPILEDKLEDLTPSGAVDAARVGKHLLGRYPDLVPQTQRILADKKSRTYDTAKNLITAFPQNDTIDIVRVTTNANGSMESLIPHKSCENFSKTPGTKEQDKFIKIYGTSVAKRLAPFMPFQMTPFDVVGLQQLCGYESAINGKRSDICAVFTDAEWMAYEYSWDLKYAYMVGPMNPLSPYLGFPWLQAQSEIFQNIQEKNHPGGAWSEDQRFFLSFTHREVPPFVATALGLFNSSSGAAEEFPTDHINVFTHPYFRLLYLLTLNQWTRAWRMADLIPFLGHV…
KZM22478.1	>ST47_g6391	MKITVFSLTLMLGTVVSAAPTLQSIPGLVNRDTPEETIDCGYCTGMLDFCFKNGHTQGQEGCKQTCREHVCHRTPECKNCHGEFDQCPEKSRY
KZM22485.1	>ST47_g6378	MNAVIILVILTTLAQAGLIPTLPPILGRDEFQNSALHVSAGRNAMLVSDKPTQDYNTVQYRAYIAFLVLGIVLAVLFLPVVLSRSIVGWYCKEQEKKKVQQRNVDMETATAQMRAMTQPEVVHLRPERAG
KZM22492.1	>ST47_g6401	MKFSALTLLALGASATAYVVNDKKVVTNNAVEARVVGSGPVRASALVAALQARDPEPHHKGKGRKGKNNKREVEVEARQEEFDQAADDAHWADLHTREPHHKGKGRKGKNNKREPEPVVEIEVRHHKGKGRKGNNKREVEIEARHHKGKGRKGKNNKREDENEPDENEADEDEADEVTKREPHHKGKGRKGKNNKREVEVEARQEFDQAADDAHWADLHTREPHHKGKGRKGKNNKREVEVEARQEFDQAADDAHWADLHTRDAEIEAREPHHKGKGRKGKNNKREVEVEARQEFDQAADDAHWADLHTREPHHKGKGRKGGKGAN
KZM22511.1	>ST47_g6385	MRFSTIAMIAGAGLASAQVESFLSSVASSIGGQVSTALPGGGASSLLSSVQSSLGSQVSSIAGGASSALSSIESSASSVAASISASVSSEAATATGSAASSLSSAAASARSSASAAASSARASASSAAPSSGAAAPTAAPVAMGALAGGLALAAGLL
KZM22521.1	>ST47_g6267	MHFSTLPLLATFASSAIAAATPKPPAFFLAGDSTTAVQSAGGGGWGAGFLNTTLQNGATGKNFGHNGATTVSFREGGDWANVLAAAKAATAKYTAYVTIQFGHNDQSPLLLPTVHLTY
KZM22533.1	>ST47_g6278	MTSGTVSSLVLLLLSSSVFAQQQVQYNQVLNVNGDMNLNSFVFPDRSKVETYSQKQQQIIVNQQQPAIPANQVTGSTGQPFVAITTQSMTISTNGATDLVGGQVEMAMTMQNLQSAAVQPGNTYVAMLSPDRQSWMIQETMRSVNTTDMTVRMVKRNQLDGEYMVVGRQTVETNTLVTPFGSSGATQVAIQGTGLQENEFQDGFRMATRATQPMLMNVDVKNGIDSGMLAGLKGQSAVNNYRYSVITNLAAVTPNLNQQVTVVQMPINAVRIQKMMQAMGVPPTGQVAIAVAQRGVLQNPGGATGQLQGAGAPTQKRTPSRDDFRKDIAARQINTGNTNTGNTNTGNTNTGNTNTGNTNTGNTNTGNTNTGNTNTGNTNTGNTNTGNTNTGNTNTNNQG…
KZM22565.1	>ST47_g6184	MLRARSLQWFCLTIALLSATAFAQTSTSQDDCDWYCWIEGRLDALEQQVAKLTAVIYPGGSNNGNEPSYTQQPPQHVTSTPSRHSTTFGNPYTTTAYNGYPTNPRPTTTTTKEVVSVSTTSQASYPTDVSSHDGYRAIGYFGNWDIYARKFFPQNIPVERLTHVLYAFADNKDDGTVFFTDTYADTDIHYQGDSWSEAGNNVYGAVKQLQLLKQKNRNLKVMLSIGGWTYTNTNKHMDTPASTAAGRKKFADSCVAMIRDYGFDGIDIDWEYPQDTTQGGQLLELLKAIRKALDDYASTLIYEDGHGSSEQPHFELSIAAPAGQSNYKNMPLHDISQVLDFINLMTYDYAGSWDKASGHAQNLFKSTSNPASTPYNTFDVVQAYLSAGVPASKVNLGMP…
KZM22573.1	>ST47_g6303	MYGFKVLVAATFACVVAAHDSPYDTACVAPVTVTVTETVCGAPGVPVHTPPVAPSYEAPPSPAPPVTSVEFTATAPLSGPPSEPATVVPPAPPVETGVSSVGVPPVVPSSDVVPSSGVAPSSGIESSTASVPGTTTAPSSTAAVTRPSSTSSTPETVSTAGAVLPTPYLGLGSLLAAGAILNAAMAVIV
KZM22595.1	>ST47_g6226	MRIRKPFAGVFVALILISAAAGFSPSDYSIPSYKQSDKVLHFVAFFLLSVAFYWILETSRRKVLQFTFVVCTIGLGVASEVVQGLLPIQREFDPYDIAANVSGSLIAIAICNWYHKRMIERKRAARGYNAVAGDDDLDIELGEGVGGQETGVVRPTVDDELDHWDENEEDWETTDPDPVIGNGVNAATVVAVADDVEDGKKRSD
KZM22602.1	>ST47_g6310	MHLSTVLLSVYCGLAAAGNPHPWMYGVPDYPDLDMEEVMTQAGAELLSEAASSATSTASNATLSSNTTASAGKEPCAAIGNAIAAAPPGARKVVSAELGLRCLMSVPLDKEGNVKLVDDIKLFVKWQSNTAYLKDPPANYTEKPVDIMGELDTMQKGLASGTFKTEYDFQMEMMNLFNRAYDNHFAYQPDILASAMQFQRPPGTELVSVSSDGKALPEVYTYQDIRKANNDSSFKPSPVKMINGMSAMTYLQNVSAQSDFHDADTRWNALFPSQALIASGTVFLGSFRTGQYQGPNTTMEFANGTTYNQMNVAVVFGNFTDVNSGQTFFKQFCTGPKPDPVIEQPTTFAAASKTNSTPTAAPTPSMIGYPKAVILNPNLAIGGYYINDTGYDDVAVLSL…
KZM22603.1	>ST47_g6311	MKFSAVLAVAAASQLASAHTTVWNILVNGKDAGVGNSQGGYIDSPPNNNPVTDVTSSAMTCNVAGVKAAKSIAVKGGDKIAFQWHHDSNQASDDIIASSHKGPIMVYASKAGSSYSWTKIWEDGYTDGKWAVDKLIAGSYTGKAGQHDLTLPNLAPGEYVLRPEINALHEGDRQGGAQFYMECVHIKVEGSGTAVLPAGVSFPGAYKATDPGVLFNIYSGFTSYTAPGPKVWNGASSGSAPAAPAPTKAPAATAKPTATKTTLATVAKPTPTKAAGAAGSAAKWGQCGGIGYTGATACVSGSTCTKQSDYYSQCL
KZM22625.1	>ST47_g6237	MARLSYVIALLPCAVALSNHATAETKRVAIIGAGAAGSSAAYHLAQYAGSSSTPTNVTVFERSSYVGGRSTTVDAWADPSLPIELGGSIFVDVNHILVKATRDFNLSIASSEDSLATRLELPDLGIWDGERFVLVTREEDGWWDKAKLLWRYGLAPLKTNRLMKSVVGRFLDMYEEPLFPWKSLGEVLEKQGLLDITGVTGDQYLNANGIGEAFARDVIQASTRVNYASNLAYIHGLETMVCMATSGAMQIDGGNWRIFAAMLKSSSSITTHLNTEVSHVSKQEDGTYRLSINGSLSTFDEVILAAPLQFTNLTISPAPKHTPDAIPYVKLHVTLFASPFQLDPAAFNLAPGESVPQYVLTTLPPSEKPLDGHPGSPDFYSISMHYTSLNRHASPPRQE…
KZM22628.1	>ST47_g6234	MHPTTFPLLAALALLSPSLAQHPLDSLKCRIPGVGAWNIDPALGDRSYNASGTRPFTWNNTAARNLNLTEPWLISVITNDTARGHHVTPGSNYEGKISAEAVTNKGYLSVPDNVRNTSLCIYQLMPVNATSEGDGSNGCSGVLSPKCMDYLRSVVVQTNMSTPDACADTPLGRYPRDAAEAACGAEFKGQADSARIQDAGNDTCTYPSLPSIDLPENYHTFQRWNAQLPWYNFGGIGDFSPNQTYDLMVAQSVPFIVAAQFNDSTQPAPESDVQFVCVTPKDVVAGSRVPENKTPWNHTTQPDSGAGARLGRGAAVVLARAGAVSLTLVLKEKRHTLREPRKPLFPFGDTAVAKSRKEECTPSDIRGRYVHAEVGRVSSPYRDLYPDDDATERYDLRVS…
KZM22657.1	>ST47_g6304	MKVFRLAALFGGAASAVQPLVGRDDGTTTTVIYTTSTYTITKCAASVTNCPVASATEVFTSTTVMSVTTTICPVTSTPGLQPPGPGYMPSSVLSSALPTNSPGTTGTLPDAVPTSYSPAVSVSSGAYVPPVQSSALPTGSSRSIDFSVSLISPDPSLPVTGTDSIPASTPSDASGPPSMYTPPAQTSTQPTGPSGSDTVVVPRPSLSGSASLPGSLTDSIPTSFPPGMSPSASSNGYDPPQLSTTAWPGSSQPTTGTNTGAVLTSDATPSSGYGQSSAPSNTATDAVPTSGYPASSTNPSSGVYSQSASSNTAAVPTSGYPGSNAVPSGSNLPSVSSYTATDSMPTSGSPGSSGAPSSGAYLPSLPSNTNTDAVPTSGYQVSSSTGPVGTNTGSVPTSL…
KZM22664.1	>ST47_g6161	MRDLLLVSAATASILFARHAEAVAANPLPKPSHITWGDSGCFSVGTLALSAPDHQVLQQAFDRAASTITELKWIPAAVEAPIREFEPFPSSTASKKKSRKKRQYGVPPTGNCTGRLTTVTVDIADTHASLQHGVNESYTLDVSAGSDSVDISAETVYGALHAFTTLQQIVINDGQGNLIVEQPVSIQDQPLYPVRGIMVDSGRNFISKKKILEQIDGMALSKLNVLHWHMVDSQSWPLEISAYPEMTEDAYARNQVFSQATLKEIISYAAARAVRIIPEIDMPGHASSGWKQIDESILTCQDSWWSNDDWSLHTAVEPNPGQLDILNNKTYEVTGRVYKEVADIFPDNWFHIGGDELFLNCNNFSSLATDFFASGKTMGDLYQYWVDHAIPNFRKQANK…
KZM22672.1	>ST47_g6256	MDHATLVFSSVFPVLSLSHTTPTPVATPDLGFTAPGASFGSPYIPRQHELHDNTQHRSVKRTIAWSCATRFLSLDKVVPAVPRILHRTREVEDALVYLLVGEGRVEDGARHGEEGLLEWYTNECRLHFANNVRPGLEELWTDEVKLARSWDVLDESQTVLEQVQNVYLEPFNEHVLPFLQANASATVRPTRPTRRDEDDAAEHAKWKFRRDVHALFAHCITPRRYSKTLSYVLYDAGCRLFRIHTRQDGVQPSAAPEDTPELRQQMTTLLQGLERVGLGGETAQKAFAHATNKLLDSFVNSHYLKVDWYSRKSVVPQLKLWIRDGFCPLIELVLECLRCEQSTILPTEVTSWQEMALGRLGRVRVDNLFDFVINWDKSLGAILDIKDYLKVAGAKQNLT…
KZM22679.1	>ST47_g6241	MKLSVAIAALLPLLSSAHTIAQRVRVNGADNGEAVGIRTAQSNYPIQNVNDGNIACNSNFKQPVSTKVIPVKGGDRVGVLWGHVIGGAQFSGDPDHPIAKSHKGPTIFYMAKVSNAATASPSGLKWFKVAEDGLDGSGQWGVDRMISNNGWVDFTLPSCLAAGDYLLRAEIIALHSASKSGEAQFYMGCAQLKVSGSGSSSGGQTVSFPGAYSYMTSSYIPALASIPVFASIPAFASIPAFASIPAFASIPALGVASSSCANEKQANDAGILVSIYNSQGQPVGSGTPYKIPGPAVLKC
KZM22689.1	>ST47_g6285	MVSFTLTSALVLAATLMMASAQETSSDPFWGTVTTPSAIASPTTTIAANAMETIGCFETGTPLSNYGFYEYQSPGNCQFVCLQYGKNVLGLSNGVDCWCGDQIPALDWQVNNSTCATTCGGTDKELCGGANKLWVMLTGNTRNKVGYFSIPADSSSSAKTSSTAASTSSATTASPSPSPSKTASTNSDSKPNTAGIAAGVVVGVVGLAAIIGGVWFFLRRRRQHQAEEDYRRNAAGVNDFINGGKTGASSLNDSRIDPSFMDRRQSNGSIADNEDYSRRILKVTNV
KZM22693.1	>ST47_g6255	MLALTTSSLAALLLLAPVASSVSVAENFLETLRTPRPFHALPSPNRNRTCVAESHNDLKTDDAENILQAVQDCNDGGHVIFAEKQTYTIASPLNLTGLSSIDLDIQGTLSFPADNLTYWQANSFDLQYQNATSFFILGGSDINVYGSGVVQGNGQAWWDEYVNNKKLKRPVLFAVVGLQGGSVSGLKMRNSPFWHNIIANSSDVVYSGLDLFSTSNNGNFEKNTDGWDIYRSERITIENSTITNGDDCVSFKPNSTSILVQNLRCNGTHGISVGSLGQYPSRIDYVQDILVRNITMSHSSEGARIKVWPDAYSEKSAALTGGGGRGLVRNVTYDGMVLDDVDYGLTITQCYGQDDEEECFQHPSKLNITDVTFRNIRGRTNRVFSPIVAHLVCSSPLTC…
KZM22700.1	>ST47_g6337	MVKFELLIASALAVGALAHPTIKHIGSEKRFCANEEPSTIFARNELTSRAAIPKATTWNPPSHLVTALDQVWKQTQKENPGGLQDKNWITDQLMANNGTINYCVRWNQASRKSTAAERTKTTAALQRSLQKWFDVLVGFEGFPLTKLTVKTVGYAVKQKSQIEGDATGLDIYTTTDADGIPECDTRCYRGAHLDDPNGIRSCPGGEDSRYDISLWLEDALEGEIGGYGYNWGQELAGDYVLGNLDSDNIHILLHEMGHGFGLLDFYDWVPQGQTSFIMMAGSAMEITEFDAWMLRDWYRRLKEVRGW
KZM22705.1	>ST47_g6127	MGVRSLVVLLLWLFAFFSVEVCGSRVDSRESTIANIPACGLRCLFLELPASGCAPTDLACFCSNEPLEYALAACLLVNCTMQDSLETSRVQADLCNLSNDSKTQELILYTSIVYSIAFLSVALRICGKAVSKRLAWDDVMVVAALLLTALPLGFVLDMTKKGFGEHLWNLEDNKLSPILRNLYISWSTYIIILCMIKISLVLFYLEIFKARRFQITAYVFIGFMVANSFAIFCVTILACNPIPSFWNRNIKGKCIDIQAGAYANSASAIIQDIILLILPLAFVKHLQMRRSRKVAVGFMFCIGTFGVIATLMRLPSLSTFQISIDPSWDYVPITIWTELELAAGFLCVSLPSIRILLVRLLPKRVKEFFLNITQSSRSKSNPTPQHAMPVEQRSWRKNS…
KZM22714.1	>ST47_g6146	MAPKGRSPTYMVVLAAAMLDAATAFPAQVLKTRAPSTPFAPIDPQNWVNPDNMTWDDFVAPPSTSWSDPARKGRDRNFNIAMVTVDYPDSPFVVTLAPNSDIFGNPQPLAAGLAREDVPKFYHDLLNTPNDLNEGHTLHEYWMGDSFGKYGVDLTVFGPYRMPAKSYQYGVDDEEGGFNEDACPEGPPCSVDLRTDALGAWRRDVGNATADAFELAFILSAGQDESSTWQEFGEMKFLTKEDIPEEFGPPANSSLPNYANTRYVEWTSWAAASTIWPNAGGGSSTQGESSGMATFAHELSHLLGIGDNYNNPYSVPPRRAYTGPFSMLDRGSFNGPGGPHTRWQIPPVQGASMGSLHTMRDKHQIGLIDETPILQVSRSGLATSGPVIAEITARSVDPG…
KZM22732.1	>ST47_g6152	MFLCRSSILSSFLVGALAQTTCKLPIPSVPYTSGVPSWQATEYTCQGPPDIYVVEPSNGKGLGVFALHDLDVGDIVMRETPILKIDPPNYAKGTGYPMALVSELVRREFERLSPDEQAEVMSLTYHATAVEEATRDKLGIIFRTNAYNTDDQIGLFPKIARINHSCRPNTSYYWSKKLNKRVVYASRKIKKGEEFFVSYIGLLSTHEERQKRLDRYGFKCTCEACAAEKALKQVSDQRRVEISKAFMDFEPQLTLDVPKSKSARRQARMNAQASSQLAGLVEEEGLADYYAKAYRVAAISHARIEEWQPAAIFANKGYKLKHMEDPESPYTAEMYSLTSSFIQSWESELKNQSSEKVSK
KZM22738.1	>ST47_g6114	MQFSIIALILSAAVAVSASPTPVTSGENLGPHELAKRTCGTLTGIKLRICQEACKATCTIGTLGFARKLCEKACEAGPLKARHVEGEEEELTAVEDLDARNLRHKFCHATCDVICNSTILALDQLYCLKKCKARC
KZM22739.1	>ST47_g6120	MGLLRITAALLAARAAHAYPSGECSKAVKLNVPRTAAGASIVHSNSFASFSFEPAFWVEFFGNASNPNNLTLSVLERIHKHGGHPIIRPGGITMDSMVFDPEGGDPVRTTSPEGGVWRTTVGPDYYKSWDNFPEGTEFISTLNFGNQSLDIAKGLAVASASYQGSKIAYFELGNEPTNYKESRWNRSTDAYVREWKQYTREIDAAVNATGDTNLTSQRWWASSATTDDSGLEVRPVALIPAGIDSEDQVGIYSIHSYGFSTCDPKRAALATIANILNHTELTRYCDEEIYPSARAALDVGARWNIGEFNSVSCSGAPNVTDTFAQALWVVDSELIYATRNASATHLHQGATLALQSKDQVNTPDANGTPGYSTYSMLYPRDSNKRGPARTLPSFLAQLF…
KZM22751.1	>ST47_g6101	MSKGWVVALVALTGTSLAKDIYVSPTGTGTGSVTAPYGSIQSAVNAAAAGDNILLRAGTYKPTTNIQITKSGSRISPITLRSYNKEKVIIDGEGLPGTPYGLDESLPNKERGILHIEKGNYWKFYNLELINGPYGVYARNASHNYYELITTHDNYETGFQLEGASSNNTVLYLDSYRNRDPRKNGESADGFACKSGQGEGNVLRNARLWDNVDDGLDLFMFGSPVTVEEVYSWGNGFNRWGFSGFNGDGNGFKLGITDNPPANHVLRNSMAFANAKKGFIDNGNPGALTMERNTAWNNGDVGFNFRSSSSTLKNNIAAVNKGTAQITLVNTVKASGNSWQSGSWSNSTFKSVDPSALKGARGADGRVPASDFLIPGSGAAIGATTRADV
KZM22752.1	>ST47_g6100	MRGAVFAFLTAALANSVAGNTFIQPLPSRSFYNTSNSLVAVPFGTPSNVKLSEPSLVQTTGNIDLNDIASDEAWNKYKAKGLYYGCLLDMSNESAGKAMKDLRIPPSAESVWQGDLRNEIHKWGWHKAYYMPEVNCDFRDDPTMGTNRIGTALSALGLSPLPASAGGDNECYSIEHFDETLMEDEDDEIPIDEQYYNINGLDYPCTGAYYRFALNKKGGAIFAQNLLKPDSAVLENLGEDVPTSLLPQLHRGSDILWGYWVRDNPNLKNLFNYFVNHVRNDETLPLIARVLKNHGLERLPYWPGVELAMDSEDAEALLGSPIGSTIAHLLLQHKTALGVKNFEAIHVFRDNFPEDTSAGAIPEVQLLFRILDVPPDEVDDSDSDTEMEDASGVGRRRAL…
KZM22775.1	>ST47_g6067	MPSSMIKTTLFAAVLAMASATSAHMFIENPVPFIGVAKDPLLESGANFPCQVGSGGAYKIDKMNKWAVGSDVTVSFPKDHTATHGGGSCQISVTKDKEPTPASKWKVIHSIEGGCPSTGSANSGLHGTFGFKVPAALPEGQLTMAWTWFNKRGNREMYMNCAPIKVSGGTGDGFDSLPDMAIANIEVPGACKAKTTEGSDYTFANSGDSVAKLGTGPFLELCGGAASEGGNTSGSAPSGSADPAPATPDAPKEPATTAAPATPTAPSTGGSTGGGSACSENGAIMCNGDSQFGICSNGEVVWQPVASGTKCSNGQIARRDFTHRHQRTAI
KZM22778.1	>ST47_g6068	MPQHFSMSFLTLCLCSLTIHQAFAAPVAAGPTVTISDGTIIGTAIKPTNQPSLNASANAYLGVPFAKSPPERFSPPEAASSWSTPLQAQAIKPACIQQFSGSAQTQARIEEYFNNPNGPAPVESEDCLYLNVYTPPGVTPDSKKAVMFWLFGGDLQFGTGSLQYYDGSSLAITQDVVVVSINYRTNIFGFSNSPDVPFGSQNSGYLDQRLALQWVQQNIASFGGDPSRVTIFGESAGGESVKQLLANPPSPRPFSAAILQSENAIFTGEGLASYKQVLANFGCNDVACLRGVDAMQIKSYIGANSLNFPPVNGDGTSIDDVRPSIQAKKWANVPTFFGTNLNEARAFLAVAGLNNGTAIVNGALASVGITDPKITQSVLAKYAAQGVVDQYLVADRIIT…
KZM22782.1	>ST47_g6046	MKLLAALVVPLVGARVIRLEQAPLLPEHTESVAPGIGVHFTTSYATAAAKYENGTTVDLVRVQADADYIELMSRWTRSWREFDCEGPVQRLRCDLEHVRREARRKLGLPVTRESATLSKFVKKVQAAIEEELGTLVHTIAPVAPQLVGWVSEDFQDALDLAGLTSTRLGDRSSNDKPTYRDTNAAFAGLGHGLCESGTTLADCLEEERQMPYEHVLFLDFDNSSFSATVQYLQHVNQEWTYSNRVDMELGWWNLPIFEATRARFWAQIHEVILEVAGALQRAPNKIVLLGDHGTNAEFLDVIKAALWDVLEIDVSLMLSANEAEDTGMLAARGAAELAWRAETWSNEKSAQEDVESIEL
KZM22813.1	>ST47_g6058	MLTALWSLSLFIYGAACVKVTNLDFNVTWVNRNPDALHDRPVMGINNQWPIPALHVTKGEQLVVTVRNHLGNETTSLHWHGLYMNGTAHMDGPPGITQCEIPPGDSIVYDFKIDQPGTYWFHSHTRGQYPDGLRAPLIVHNPEDPFKDDFDEEVVLSFSDWYHDLMVPLLKSFISVTNPTGAEPVPNSALINDSQNVTIAVQPGRTYLIRMVNMAAFAGIYVWFQDCSMRVVEVDGIYTKPTEASMLYLTAGQRYSVLLTIDSNSLANIPFVASMDEELFDEIPDGLNSNVTGWLVVDSTQELPSPVEIDLFDPLDDFSIQPLDQLAALDTVDRTVTLDLKMDNLGDGANYAFFNDNTYVEPWVPTLYTVMSSGEDASNPIVYGSHTNSFVLGGNETVE…
KZM22820.1	>ST47_g6055	MKFQSVALCALNLASVTVALPTSSKDQDNQNNVASSRLSTSPIWPYTSPSWYNPWLNPWLSPYIPKLPGLNGLTSGLPGIFPGSTTGGSLGSGKGTIAAPVSPTGISAGPLADGLAALLAGLSIPIATPVVPAIVPAKLPTQVSTALPSLQAAPLAPVVIPTNVLQNIPVAVPTTLVTQVLAAVPTQVVAAVPTQIVNAVASNVLALLPTGLLPNRVPAAGPTLLPFGLLGGGQ
KZM22828.1	>ST47_g6016	MRFSTVAATALAASPVIVAAAKGSMGFALGTKQPSGSCKTQTDYEDDFEAIKRASDATIVRGYSASDCDSAKNIMPAAKSKGFKVVLGIWPDVEDSFQKDLKAITDVASTYADSIYAVTVGSETLYRGNFTGPELKEKISTVKGKLPKGIKVGTADSWNKFADGTGDAIIGTADIIMVNAFAFWQGASRDNATKVYLNDMFEAITHIEKVAGGVDKTPEIWNGETGWPTVENTDYEAAKGGLDNAKHFYQYGFCSLLDWGYNAFYFEAFDESWKPASVGDNGKVADETAWGAMTAQRETKFSLVCESRS
KZM22829.1	>ST47_g6015	MARLRTRHIAFCAVLVLFIFFFLPANHTIAYLPQSSYGSSSRTGTHALARYMNDPVYVPDIRAKNSSFDWSSVRIAHPPPLTPVLPPPVAHRPRIQYRFKPDRADVAVIQEQRRLEVKRVFQKSWASYRAKAWMKDALKPISGQYVDQFSGWAATLVDSLDTLWMMGMREEFYEAVEAVASIDFGKSTAATVNTFETCIRYLGGLLAAYDLSGHEVLLKKAIEVGDLLYAGFNTENGMPVDFINFESAKEGSGLRVESQVVSASPGTITLEFSRLSQLTGDNKYYAAVSQVMELFYQNQNATRLPGMWPMMVSMSQKDVVSGYQFTIGGNADSLYEYLPKAHALLGSTDPSSAKYEAMSRYFMDTARDNLFFRPMIPGGEDILISGNCDVLDGGARLDP…
KZM22840.1	>ST47_g6020	MHLLAVYTLLLSILAITAVRALPLNASAAGVGNYIVQTAGEYNPSNLASDAIWDKYRKKGDHYQCLFEANDENAGRLVEDSRTPPSAQSVWKGTRAADRHIWNWHELHFDEDDCNFEYLNLKDAFDALNLDAYCEEEGGHNMGWGLGHYDEEQVDKITDPNTDFFPMIPVIEQTYTVGDKIYKSTGGYYIFVINQIDGAIVALNIFSPHNAVKTHWRSIGGTAKDEDLPKLRYMSDLVWGKWVENNDNVKNLRVYVVHNVLNTETTTIVSRAMRNKLVPKLDVWPGTAFDKEKDPVEFQAIIGSPIGGTMSILLAQHKEELGNKEIYQINVISDSKSIKPFQVPELHLFFQIRDVPPPKKAQEERSVIDKRTGYDSGTTDAVRRSHRIVSSPADNTILS…
KZM22851.1	>ST47_g6004	MGGFKLLSLAAFAGSTLGAPLEERAKQPKSFFKEVGNSTWVIGNDVWNVTQNLQYANKLWYKGKDRVGQAVGHYVSYNGAASDLKWTSALVVDTGSDWINIKFTAIEGDMHWVIYDGLHGSYQYFVNRALPTLGEFRTLWRLDNVSFPNARTNVRDGPLPALAEYTISTNVQDETWQKPDGTFLTKYDWSSNVRDNDFHGVYGDEVGSWYLNPGKDYFNGDHLKQELFVHRESKTGDAVQLNMIHGTHYQAVSRDVFVDGKVWGPWLWYLNDGSKDDAAARAAKEESAWPYKWYNDKAYQSRGKIQGRLLLSDGRPAAGAAVFLGDNNNSTISTLDQGKDFYYTSYADVDGKFSFKDVRTGSYALQAWGNGGAIGDVTTNFTQNDVVIRKGDTTNLKDL…
KZM22855.1	>ST47_g6008	MKYAYAMLPALAAASPMIQVGTIHNDAAPILSSTHSKEIADSYMVVFKKHVKHEHTKAHHDWVQSIHTKAQSDRMELRKRSQFPITSDVFEGLKHTYNIAGGILGYSGHFDEETIEAIRRHPDPAPASSSQLQPAPASSTARLRPLAATVERQQLHATFLRVKSSAVLHAPARDGASDLQVDYIERDSEVHTLGGDDYETEKNAPWGLARISHRDSLSFGTWNKYLYSADGGEGVDVYVIDTGTNVKHVDFDGRAHWGKTVPNGDADEDGNGHGTHCSGTVAGKKYGVAKKANVYAVKVLRSNGSGTMSDVVKGVEWAAQAHTDTVKAAKNGKKKGFKGSAANMSLGGGKSTTLDLAVNAAVDAGIHFAVAAGNDNADSCNYSPAAAANAVTVGASTLL…
KZM22869.1	>ST47_g5970	MLVASFVAALLSAVEVTYSAPIEGSSPPSDPYNCGYVRTRWNSSAVAGIFALESCTPFYYNETIGNYQDAFAYTLYGGCTCRFYSIVEDCLKNAPVPQYTGSTDRWHEPLFAEPRPTWYTCHESK
KZM22877.1	>ST47_g5956	MRRNSISALALLPLLSEVQAALDGDALAKQYFGNDAPWYRNRIPFFETSDRDLTDVYYYRWNIFRAHQRDLGASGFISTEFLDDVGWQTKPWASLNDATGFHLLEGRWCRDRRFKEDYATFMFSSNSNTRQFSESMAASVYKGYLVDGVATDATARLDAMTSVFDAWQDAFDTSKGLYYVEPLRDATEYTISSIDATNGTDGFTGGNAFRPSINSYQYDNAISIAKLAQLKGTSNDTVITYNKRAADIKSRVQNDLWNSTLEHFIDRFQVNNEFVKYWDFIRGRELVGFVPWAHDLPDDTPEFAEAWKHALDTNEFAGSHGLRTVGPTYQYYMRQYRYVEENGTQPECQWSGPSWAFQTTQVLTGLANFLDHYPDGTATGTISRSDYTKLLQQYARLHY…
KZM22882.1	>ST47_g5951	MKTFPTFASLLAIGLAPTTLALPRRSHFESDKAYLTTRATTGTIALDSHVEYSSSMGVIGCLINTNRIAYFPTVPPCNNPCIKLTAPNGNSITVLHIDQSGGSYDVSMDAYKTLKYGADWRTINTLPEAKWDGVKYEHVAMDQCVGILPDGTLPVIAKSPNKYVECAASEPQSFWATHTQFYDIDDARCLRGVLQTCKMVPPNNTPTCANGKMAGMSGQMPLIGVNTVVDITAAGESVPAVRPAV
KZM22886.1	>ST47_g5969	MLLEIVIAFLLALANARVLQLSSGHYNFTNVAVVAGDEPRPFFLPYPFATEDFYDICKCKGQNFWRAMHSPSADAGKLFTPVRDSSESVYTDTAALTTWSWKDATVPAINYKFDKAWGIDHVLRAIGVSDKATKDGGSIQVFRVAHGDADADAGSFGPTPYDNQPQYTSGGQSFRVTGSEYTFGFDTSGVLLAMNRKSPQYAGGQRKPKVEGDGLPDLQSFSDIAWLKWKATTGTEPSSLRYFASIAITNLETRGVFAKVLDKAQYKEVPAWPGYDVDANTDEGAALMGTPNALAFSYILVQHKASLGNLKISKITLFKNSLRFADACMLFHVDRVALQDMEGAAHARLFLPHHLYKKPDLTVNDLKMKLRNLVLVGFIVGSLQLHLPTPPTGRDVQIA…
KZM22899.1	>ST47_g5968	MHFLNAILLVLPLALASPTSPGCGTIQDKTSLGETLIGDNQCHGIGADAKSWSVDDECVCVAFNTNECSDTKPETWEYLTGGHTDVDLSGRGVKWYKCFTSESLAYEWVAKFEAANLSSKKW
KZM22901.1	>ST47_g5967	MKLIATLLLLTVSLSVNAAPTHDIDTSTMSANPKVDPGNTTLDGRGAPRFSCGQYKFNDGTVQEFYSQVWANIPADQMVCRFFKYEFRGKKGQEGTMVAAKVDAGCTCFFYEKPCDPGAGHAEVWTGWSGWENYVSTERKFKGWYCFERS
KZM22906.1	>ST47_g5961	MITCSTPAAAVALLALASSANAQFPAEPAGIKVLESRFGDGVTISYKENDLCETTPGVRSYSGHVHLPPGTAELGQGQDYPINTARRPYSQPLVDDPTDDSVQFFWFFEARNDPSNAPTVIWLNGGPGSSSMYGILEENGPCYANPDSNSTRLSEWSWNNQANMLYLDQPVQVGFSYDTLQNVTRDLLTGEVSLLNATDPVPEQNTTFLTGTFPSREPNNTAFGSVNGAVAAWHFAQAWFQEFPHLLPNDTRLSLAAQSYGGRYGPAMFTFWEEQNQRIENGSWDGGEGEQFILHLDTLLMISGCVDRYVQYPYYPQQAFRGNGYGIEAVNETVYNAMVESVPECLQRIQTCRDAAAESDPENLGIDATVNELCEEAEGFCRSHIVSPYTQYSGLDYYD…
KZM22917.1	>ST47_g5918	MRFSLASTLVVTLAAQATANSWFGKSVYDKWHETELERWLSDNNVPHPGPSDRKNLQKAVADNWNDKVVNPYTSWDAKSLTNYLTARGQQAKKGTENDAKSLAEQVKAYWYETEDSANQAYSSVKDWVFDSWTDSQLKAFADKNGIPVPQPRQRDSLLKSVRENYQSAADKAKETANYPGDWIYASWSDSDLKSWFDERGYNVPQPSTRDSLIASLRRQSRLASQNAKGAYAQVSSSAAAAQQSLSDALLDSWSDSQIKEWADKNGIKVPQGSKRNELIALARKHRARLYGDSASATAASAYGAATSNANSAAAQATDGFAYYTNLIKNQFGIATDAAAASASSASKVATASASSAKGQVKSATGAAAKAASSSSSSISKSVASASADASKSAQSAASA…
KZM22931.1	>ST47_g5943	MTMLTKTVVLALLLHASLASSAPTNSTGPTAHLRNGTYQGVYSPGYDQDYFLGIPYAQPPVGNLRFRSPVSLNQSWSGVKPATQYSGECYGYGSDQWNYPVSEDCLYINVVRPAGCEDEKLPVAFWIHGGGYYMGGGVDQRYNMSFMVENSVKVGKPMVGVTINYRLSAWGFLSGSEEIKDSGEMNLGLRDQRLAMHWVQDNIEAFGDKVTIFGESAGAGSVGFHLTAYSGRDDKLFRSAVMQSGNPVHFNRLNDPLGFADMYNAILGRTPCMNASSPLECLRILPAEQFNAAINVTSATLNTTQFMPVLDGDFIQKRTSIQMSNGEFVHVPIISGANSDEGTAFSPEPVNTTEDLYTFMTTGDRAVPPALANQLLEVYPDDLSVNVVASLGDTRPGPP…
KZM22933.1	>ST47_g5930	MLSKWSVLGFAATVLAQTNGTAPTLAEALNSSTQLASLSGVLALPGLAQLVQSLSSAQNVTLLAPSNEAFANVGNATLGALTSNEGLLTALLQYHVLNGTILSSAITNQSQFVPTLLNNPLFTNVTGGQVVEAVASGGNVTFFSGSLSNSSVTQADVNFTGGVIHVIDRFLVLPEVPSDTLTTANLTSLRGALNATNLLDAVDFTPDVTIFAPSNQAFQDIGSALGNLSTEDITNILTYHVVNGTVGYSSGIENGTTLTTLNGQNLTITIGEEGRIFVNSARVTIADVLVANGVVHVIDEVLNPSNATIADPSDEEGEGAFPGATPVAEAPFTSGQPTPTTSINEAATSAAAPGASSSSTAGAPAAMKTGSFGMGALLGAAAVYAFN
KZM22948.1	>ST47_g5897	MFILTPTLYKSVLSTMLLTQLFIAASASAAVITSRQTGNGALQSGGQTLVLKEVGGIPGNECLTFRNNGEIVDAACVNTAADRQLTPSTFAGADVLAVQRSFSNGFRPDLVNTQACVGFNGTHFKAIDCADNSLDPVSFQNGQLVSASGACQSGHDNAAQITVDPSGQNCAQLESTAVQPTST
KZM22956.1	>ST47_g5900	MKVLSILAAPLLVSASPLLAERQSTATSIDTLLKGVGKIYFGVSSERAKMPSGKPETAVHDNYGQVTNEYLMKWDQTEKSQGQFTLGPANDLVSWALSNQKSVRGHTLVWGEALPDWVKNINDRAQLTAVIQNHIKTVMVGPNGSWKGKIRSWDVVNEVIDNNGNLKNTHFYQVLGEDYIGIAFRAAREADPSAKLYINDYSLENNTYGQHIGMMKWVNKWIHQDGIPIDGIGSQTHLTSGKGKNTKPPITQPVLTSIAADAADALETALRDLSNIDSKLEVAITELDVVGSSPPVYWKAVQACYHVPRCVGVTTWNLIDAGSDNKALFNQNYDPKDAYYQIRDELRKIQK
KZM22957.1	>ST47_g5901	MRLFAVLTSYLSLAAAATLGKRAPTPGTLSQVTSFGTAPTNVSFYIYVPKKLAPSPGVIVAIHYCTGTAQAYYSGSPYATLAEQYGFIVIYPSSPHSDKCWDVSSKQTLSHEGGGDSNTIANMVKWTLTQYKADDAKVFVTGSSSGAMMTNVLAATYPDLFKAAIAYSGVPAGCFVSASGEIDAWNSTCTQGQSIATPQAWAKVVTDMYPGYKGRRPKMQVYHGSADTALLPPNYQETMKQWAGVFGYDYNQPQSTKVDDPQSGYTRTVYGPLVQGIYAQGVGHTVPIRGADDMEFFGFA
KZM22964.1	>ST47_g5893	MIVLIQGLLLTAIVLNVNKATSSLTPINASCDSVQVGWRCDPRISHFWGQYSPWYAVPSEIDLAPPKDCEVTFANVLSRHGSRDPTLAKTTTYRALIATIQHNVTAFPSDFKFLKHYNYTLGADDLTDAGRQEMINSGVHFTDRYKKLLRKHTPFVRSSGQDRVVESAQKWLTGVALSLKQQTRAIDVIIPEATASNSTLSHDTCPAFETGPYSDFGAAVQKVWSSRFVPPIQKRINEALGTNLSITSVVDLMDMCPYDTLASPDATISEFCQLFTEDEWHAYDYYQTLGKFYGDGAGNPLGATQGLGYVNELIARLTEKPVDDHTNTNRTLDSDLATFPLNNKVYADFSHDNDMSGIFAALGLYNNTKLSNTTMENNDQTGYSAAWTVPFAARLYVEK…
KZM22969.1	>ST47_g5876	MKFFAFSMLTSLAAASPIVLAAPAADTLEVRQLDPIIRSELEQGSSSSCPKAILIFARASTEIGNMGVSAGPAVASALERAYGADQIWVQGVGGPYTADLPSNFLPGGTSQAAINEAVRLFNEANTKCPSTPIVAGGYSQGTAVMAGAIPKLDAALRARVVGTVLFGYTQNQQNNKGIKDYPQEDLQVYCEVGDLVCDGTLIITVSHFLYLEEAAGPAPEFLKSKIGA
KZM22972.1	>ST47_g5871	MQTIVLLALATVGQSTYIKERPAKPTATAAPCHVTAYSAIPAAIAACTAITLDGITVPGNSTIDLSKLKKGTKVTFKGTTFWEYFDANYPFIKVGGTNIEITAANGAVLDGNGQSWWDGLGSNGGIAKPNHFIELNKVLGSSSVHDIYIQNYPVHCFAISNSAGLDVYHITLNNSAGYAPNARSNGLPASHNSDGFDISSTNDTKVRDSVVINQDDCVAITSGNNIIVDNMHCNGSHGLSIGSVGGKSNNNVTNIVFRNSVVLNAENGARIKTNENTTGWINNIVFENIRVENISIYGIDIQQDYLNGGPTGHPTAGVIISDITIKNVTGTATKKGRNYYILCGPGSCKNIFIKDVDIQGGGVPSLCNYQTGGNFNCDGHLSMTSS
KZM22973.1	>ST47_g5872	MQLQSILTIFALTLSTTSTAIPAPAPEAITAPEKTLEARVTQLKWNAKKDGDICSRSWSGVCYEHCVTEGTAPAKNCIRSTITSAIDGAGCGWLSGKSKCKCVCNKP
KZM22974.1	>ST47_g5873	MQLTTLLLAGLSAVSVSAVPSMGASWVPNQVTVKEDYKVPGDNPLYFCADPADYILQIEKVDLDPNPPKPGEKLSIKASGDFKEEVGQGSKMHLQVKYGLITLINQERDACDTIEQADLKCPLKKGELSLTKDVDLPREIPPGTYTVLADVYTEEGDKITCLTAKIAFHRHRHSSNNGGSSESSGAGSGEGSGILSFGNVKVGRRKFEMSGPAAGLVHQRMQDRLRQRDEL
KZM22976.1	>ST47_g5879	MRSSIIASLLSAVSVVHGYANPMACSGVCNNAHDPALIRHSDGTYYRFSTGGKIAVHTAPAVTGPWKYVGAAIPSGSIINLTGKDDLWAPDVTLIGDTYYLYYTVSSFGVQDSAIGVATSKTLAVGSWTDHGSTGITSKAGNNYNAIDGALYWDGSKLVMSFGSFWSDLFTVDMVNPPLKSAGGAPKNIAFKPEGEHAQEAAFIAKSGDYHYLFFSAGKCCGFDADRPAKGAEYKIQVCRSTSATGGFVDKSGKKCTEGGGTTVLESHGWVYGPGGQGVFWDPELGPLLYYHYVDTRIGYADGQKQFGVNKLNFSSGWPTV
KZM22981.1	>ST47_g5881	MRSLALLAGAQLATALYRNGSVIAPCDSPIYCHGDLLREIELARPFSDSKTFVDLPTIRPLDEVLRAFSNLTRPIQNNTELNSFLTTYFGEAGSELEAVPTDQLETDPDFLNNINSSVIVDFTRQVIDIWPDLTRRYVGTGTSNCTGCVNSFIPINRTFVVAGGRFREPYYWDSFWIVEGLLRTKGSFTQIAENIIENFMDLVEEIGFVPNGARRYYENRSQPPLLTQMVRVYVEYTQNYTLLERAIPVLELEYEFWVNNRSVTLERGGMNYTLHNYNVSNTQPRPESYREDYITANNQTYFNEEGEQFNASQPLNDTQRAALYANLASGAESGWDYTSRWLKNPSDAVNDNFFPLRSLNVINTIPVELNAILYYNEITIAEFHRREGNYSAARQWAER…
KZM22983.1	>ST47_g5883	MMRFALLSTLLVAAIAQQSGKDPTKDVCRRHKHQTCIIDSKLYVDGGLAYYGGSKGNDSVAERNTYLLWEDVSNATRTEYSFPDQHANLSKGRDVPSVSGGVLWPDTVNKLFYLFGGEYNDTEEVQSRDGPTQGFSLWYYDTIYDAWNKTKGHGSQSSIRWPAFGSGTVSDAGIAYYYGGYLTNTSDFKTVGQPVMQNTLISYDMDSRQWDSHIWDDTRRAEGSLQYIPASEGGMLVYFGGVETDKTSGGLSYANMSQIHVYDVANPRWYTQTATGDIPRPRRGFCAGVVWAKDKSSYNIYLFGGFGGPDGTGLGDLYVLSIPSFQWILIWPTPQQTIFPGGKGWSSCDIVRDSQMIIIGGALTNTSVPDCDAPKIGGQHGLLLGQENVELESWWHAPM…
KZM22988.1	>ST47_g5654	MPSSTTASRLSRLSRLSVFFLLTSAVTPAQASTLFSRQAQTCGGVQGLQQCGSSFPSDFCCPTDSTCMSLNTADVQSVICCPAGADCAFIQPITCDVKQLNATLHPDNQMHLSDTAGIELPTCGTQCCPLGYTCKSGMCSKDDTSPSPTSSATSTPSPTRPASSSQTSGCPAPVPVKQGFDGKSFAAGLFPGLVIGALGAIGLMWLINTRRESQSEKKYSGDFGHVARHISDPIYDPEHAARVDFIRRPSHSTHRSPNSYNSNTGMVSNGMPSKPTVGTGLTPRIRSMWDRTPKLNFGFTNGPGLPANPNPARPAPAVRAGSSDRDPYKTPTFTPKRAPSQRRTSRSSRSHRRREPEMEQRPPPPDRQDSTETIDVLMPAPNLSFLAPPKAPGMRENRA…
KZM23007.1	>ST47_g5794	MLGPQLMFAAAIAAVAASAGYLPPTAENPHFSLNLKRQSNGTNFHGPYSTQGRDIVDSRGEKITWAGVNWPMSGETMIPEGLEWASADEILDDIASVGWNYIRMGYAIEMIDQVYDRNGTDVPLEVALINALGYVNGTKVTNEIIAKNPGWTSQTTRFQIWSDIADLAATKGIFISPDVHVGKAQWCCSHIDGNAWFDDINFNATHWRRGISYVADWAKQHPNIVSMSLRNELRESWNKTDLYYNWDTLVGNMTAGADAIHTANPDILIIWSGMQYGQDLSALTSGKNILAAPCYKCTAIRDAARRDPVVFNLQDHAWADKLVWELHLYRMSEDVDTGTCDIIKAGFYRNGMNALGIDAPPACNVTNDCPPAVAQTPVIISEFGSAQDETLFNDTLQNC…
KZM23015.1	>ST47_g5633	MRSTAVLALLLGVFVAFAAAWSKEDHEIFRLRDEVVKSEGANVTFYDMLGVKPGASQDELNKAYRTKGRELHPDKARKAFLANYANKAAKAGKTPGVKATKGPSKKEIDAHMKKVTARYQKLSVVANILKGPERQRYDHFLKNGFPAWKGSGYYYDRFRPGLGSVLIGVLIVMGGGMHYFALLMGWKRRKEFVERYIRHARKTAWGDETAIRGIPGADAAPAPVPVNAQQSDNGEEEEDKEPEFVPRNRREARAWEKDQRKNSKKPVVAKKARAAGISAPVETELISGPQGAKKRIVAENGKVLIVDSVGNVFLEEETADGIKAEFLLDPDEEPAPTLFDTLLFKLPRFIYNQSAGRVLGKKELVDEPLLETSELPEDEAAIQSATAQNINGETRKRKT…
KZM23018.1	>ST47_g5636	MRSSVGFLGLLLVAAPAALAQGNNNLPQLSTIQQPDGEGASSSAAASSSAAPSSAQTSTSAAASSQAPSGTTAATADNGGSFPTVTQGIVGLSGLPTIAGVGVPNQQVPDTAGALFMQKSDLPDGTVFICVGAILGFLGACVLLWRGLVAWSLHRSVKRAALAQNLADMKAMSAVPGKKRGMYTHVGANSTMSLDHLAAAPTGHSKPQKPFAQAPGGTPPRTTSSLFFSPTAGGAAGLAAPGNRSSNYLPAGYYASGNAAPAGGAPMAHVGGHAGHLSTNSLALPGNRFSRASGVSPPGSPSLPPSRGYDRSPPSRDGYSNYNRNSVAGPNTAGNTRSSVYGHGNGNGTMSNLSLNVAGGTTEAGGRAPSAYLEDLFENHGGSHSQERF
KZM23108.1	>ST47_g5746	MRFNAVIAATILAATVSGAAIANPAPQAAEVAEIAPETTEGIETTGSADDVFEIPEGYYYVEDASEEAIGKREADAEAKKGDWVWSPPYRPIGLPVGKRDAEAEAGKSNWVWSPPYRPIGLPVGKRDAEAEAQAGNWVWSPPYRPIGLPVGKRDAQPDAGKGNWVWSPPYRPIGLPVGKRDAEAEAEAGKGDWVWSPPYRPIGLPVGKRDAEAEAGKGNWVWSPPYRPIGLPVGKRDAQE
KZM23112.1	>ST47_g5742	MLYSSLVVAVSALAGFAVAQNNTVIPCCTVPINNVPEGDREDWCNAQENTCVDLCGGQRNVASNGNTCDASTLNFDCKCTNGTDISSAMSAYEQTVPAQMCFFWYDACVNATIGPNGEGNAAQQFDCETARNNTCGTLTTDDGSSGSSGSSSSSASPSATRSSTGGASSSQASTTASSTAAASSGAAMANLALGTPALAAGLLAIFGLAFVHKLALFTLLRSLSSPRLPASYVRACRRPIPFARKAPTNVNPYITLSQAAKEPHRTMATLSAQRKHKVTIVGSGNWGTTMAKLVAENTKANSSLFEEEVQMWVYEEDYAIPKNSQHYNGSDKPEKLSQLINKVHENIKYLPNITLPPNVVANPDLPDACKDSTMLVFVLPHQFIARTCSQLSGKILPYA…
KZM23144.1	>ST47_g5627	MKTTVILASVTAFAARVAGHATFPDLWVNGNNRDALDRSCSNEAIGGAHYGPVLGKNAPGSSGSDDYWGTKDLNTHCGKLDVKIPTGLAPGDYLLRAEAIALHSAGGSGGAQLTITGTGTTNPSGVSFPGAYKAYGPGILINIFQKLTQYVAPGPAVISGGTEAVAGKARSTPGKRFCYQTLTDQSHSVMTSNGSESYVQKLQHYCATNQIAQPQFQDYSDPRGVRTAWSSSVFVHGREYRAHLWRDYRYLEQSREEAAEVAWKAISGASGSPTSQPQYAYPRSYTTAR
KZM23145.1	>ST47_g5626	MINLRQCLVAIASAGTALAASSYATLEVRNAGVPAGQLKNVSGIEIYHSYPPNNNTSEKAIIHLTDIFGLPLLQNKLLADSIASNGYLVLVPDLFAGDPVGVEEQEAGLNLTEWRALHPQSAVEAVINSTIQYARKELGIAKIGGVGYCFGGKYVGRWLKGDDTGLDVGFVAHPSNLLETEIQAIAGPLSIAAGTLDASFNATAKGRAESILNANNITFQTNLYAQAPHGFAVRPNLTLPLQAYAKQASFVQAVTWFDAWL
KZM23178.1	>ST47_g5865	MQPFVLTVAAVATLLGSAVASPVQPGRVQTSTGGTIIGHGASNKTSVTEFLGIRYAEAPVGVLRFAAPKKYVAPQGSVFEASEWSADSDCPSNKPPVSAFPNFTQPSGLRVWKNFAAQNSNPTSEDCLKLNVWTKNAGNTSAKKPVLVFLHGGRFQIPGPHSPLYIGQYLADAQDVVVVTPNYRLGVFGFSGAPGIEANAALKDHRAAVEWVRDNIAAFGGDPSRIIILGQSAGGASVDYWSFAWKRDPIVAGLIPMSGTSLSFSPNTPDYAQTLWYNFSQTVGCGGPKDDTATVLSCVRSKDTSALLAAAAKVPALSTQALAQATFHPTVDNITIFNDYQQLAATGNFARIPLLAGNNDQEDGWYRISGWAAKLGFTDAQWNLFTERGFTCPVALSTR…
KZM23186.1	>ST47_g5807	MAKTLIGALALASLPSALAFSNTSPFFLFSTADLLLESSGASIAQSTSITADVLEALKECPTNNYVVVEQEGVSAADYADGRSTPRLRQYMAGQHEQVKSTVSVPDVVGKVDVAEITKYLETKCGSVKTVQLDTPPVSKALRELYMGQQDQFLEDSFSKYAESQDYTVIYITTPPTESQAKAQLEAEQHTYEMENSFGDAVQMELKRDTSAHYKRANSTSNEGGLFERYQYFTPGLFMGFAAIIPLFLILLVGIRALTSLEVSYFAFSKEMGPNAQKKQQQQQQ
KZM23196.1	>ST47_g5823	MRTTSIFAALAAAETILAKGPFLQKISSDQWVIGNDLWNVTQGATYATNLQYQGSDAVGKAQGHYAGYDGESNLVFTSAAIVSNSAAEYIDVSFSSSLGDLHWVIYPDLTGAYQYFVNKALPDISIFRTLWRLDPDRFTHGFNTNKNEKLPDFALYANAPEIQDETFQFPDRSYVTKYDFADYVRERDFVGVYGDKTGSWYIHPTNEYQPGNHLSQTLTVHRESATGDAVQLNVVQDTSHFRVGVKTPQPVGKVWGPWLWYLNDGSVSDARARAAHERATFPYAFLNNTAYHSRGKIEGKLTLSDGRPAAGAAVFVGDVDTSTRPLVQGSNYYYTTFADASGGFSIHNVRSGSYGLVAASNGGVIGDVYTNFTSSPIVVSKGKTSNLGSLTWQVPANTK…
KZM23225.1	>ST47_g5731	MPRPRRPPGAGLALTTLLALVILGPSILAVAQQQQQQPDHSVLAHTIPSNHGKSTHSHSHSYSQERAGHVARRRPNPPVFAQDESALATRVSSAPAVTAVRAPSASNAATGALAPSARSLQDWEVEDFVLLATVDGRIHARDRYTGEEIWELTGQPMLETIYNVSEGTGKLQDQPFVWIVEPKEDGALYFLTPGPYPALHRLGMTVKQLANIAPYSSEDPALPVVYNVEKSTFMLVVEAASGKIKKSFSPSGTYSVDDESCAPKGRDYFHAHERECSGSINLGQTQYTISIHNKQTNEHICTIKYAEWAPNNRDRDLQMQYSATMDNQYIYSMFNGEVIALDHNRLGKSRQRPLFRQELPYPVARVFDVARPTNDDSPEPALILLPQPAGKAGSEEKAK…
KZM23238.1	>ST47_g5759	MLFQKLSLLFLALGSYAATLQTASSEVTTLDSSTSKELLALHKKLVKIESISDNELEVGTWLASYLEDNGFTVEKQEVAKDRYNLLAYGSKRDTTILLSSHIDTVPPYWPYYYNKTTDVIGGRGSVDAKASVAAQILAVKGLDEDGEARILRDDISLLFVVGEETGGEGMKAFSSWKNRPRYDIVIFGEPTEGKLVCGHKGILGFTIHATGKAAHSGYPWLGVSANDILAEALSALLELRQHLPWSEKYGNTTMNFGRIEGGVAANVVAETASAKIATRLAAGTPEIVSGLIINAVKDVKASAQKQGGDLSFDWSGNGYGPVDIDCDIDGFEKLTVNYGTDVPNLEGDHRRYLYGPGNIFVAHSDHEALKRKELEQAVLDYRRLIIQASKMEPKQSSDI…
KZM23241.1	>ST47_g5616	MFSIGIPLFFALLQVAYAAPAISPPDTGTHHLQKRLESGAVVALGICIPCVAIVLGLGIGIMWFYPAQRRKLREQNARREAALANVTSGRHGQRQGSEHATLPAYKEHEGSDHELEDVAHSNTPAALTAPIVSAATAQPSRSYEAQPPPDARHAALTV
KZM23244.1	>ST47_g5611	MRIFLYLTYFCLNDSQERLTYASPQSEILVALRDRTVPQRMLEDLYANGTPFYDRCLIVEVHNYRNNFDGVTPRVNRAAAPAEEASSLKEAENMRVDKPDSTPVLLSLRLPKITTVVLFPPDKNSADQSAAGMFDTRKVAIFQPSLDIERFHSSAIIGHDSTYDKDSWNPYRKLEHPDGPPDAPTPNHVTDASSSALNKSDPFTGLGSDRGIATKKSQYKTLDSSGYTAPTSSTPHSSATSRQGSFARTSFGSTLETTEVEEPQTTTQIPRPRRLSESDFRRYGSGAPRRRGVVEPDYYPQLLPHSDDLQVAPFSSLPQEYAPTTAHNEFNRQETEPLTYSLETPWSISNLRSDRTDQDVLTYRELTFTEPRYEQVSERTTSQQLGVADSDGESDRGSF…
KZM23261.1	>ST47_g5557	MLVPFVQVLALAATVQSAVTKPQDAVKDLQHQAITALKKVKVNGTEECSVSNAAVRKDWDTMSGRERKAYTTAVQCMLNSPSKSDASLVPGARNRYDDFVAQHINQTLSIHGTGNFLTWHRLFVYSYEKALREECSYKGYQPYWNWFSYQDDLKRSPVFDGSTTSMSGDGSYVSHNGSVGGAGTIFLPSGEGGGCLQSGPFKGMIANLGPVSPTMRGQTKVNGSLSYNPRCLKRDLTTFASAKWLTVENLLNLTAGDASENVKLFQDELQGRFKDGFLGLHAAGHFSIGGDAGDVFSSPVDPVFFLHHAMLDRVYWIWQALHKEQANTVAGTLTLNNNPPSRNTTLEDLIQTNYLGVEATTIGDSLDTLGNKPLCYIYK
KZM23277.1	>ST47_g5603	MKSALAVSAALSVLSATADAYTNPLSCSGTCTNAHDPSLVRRDDGTYYRFSTGGKVAVHTAPSIQGPWTYKGAALPNGSKINKAGNQDLWAPDVIKVGSKYYLYYSVSAFGGQDSAVGVATSTTMDVGSWTDLGSTGVESVAGSKFNAIDGNLQSANGKLYMNFGSFWSDLFQIEMTATPTKVAKAVTAATQVALVPTSPQAQEAAFGYQYGNYYYLFFSVGSCCGFDTSRPAAGKEYKIQVCRSSSVSGPFVDKSGKSCLQGGGTTVLESHGWVYGPGGQGILSDTSLGPVIYYHYVDTRIGYADGQKQFGVNKLDFSSGWPVV
KZM23286.1	>ST47_g5608	MAFLTLFLVATCLGAYALYKYFESCRLNKVPAGLKQLPGPKGYPIIGSIPDVPEKNGFIKFADWGKEYGPIYQVNLAGSNHVWISSEAIAHDLLSKKAAIYSDRPHIPALIDDNRTSGQYLPLLSRNEGHTRQRKFANVIMRESEKATFHRYPELEAKRMLVELLEEPDQYNHALESFIARVTSRLAWGHAEASDELKQRARELLVGVSPTGALPNKLPFLMALPDWMSPAKAWEKRRAKTERTFFQTMQSQVERDIQEKTAPASWMKTFLIQGASKFGFESEVEGAYAVGMHGIAGALTIAAPMQSFCLAMLHYPQYLPMLQEEIDRVCGDRLPVAEDRPNMPMLRAIVRELIRWRPPVPTGIPHFLTQDDEYNGFHIPKGSTVHPLEWAISRDPETY…
KZM23296.1	>ST47_g5565	MLSSALLTLAVANAANAAYSFDPLYHLAGIAPYFEDPQSDPATPQGCNVTRAAYLVRHAAIYANDFDYEEYIEPFTDKLGNMSVNWKSAGPLSFLAKWQTPISDEELEDLTTVGRLESYKLGTEIRLRYPGLKNPKKVWTSTAERTELSAKSFIEGLVTQSNETERVTVSEDDSEGADSLTPYKGCPKYSSSFGSKQSGEFQDVYTKPIIERLRDFAPGFNFTANDITAMQQLCGYETVIRGSSPFCSLELFSADEWLQFEYMNDIQYFYNTGYGNEISGVLGFPWLNATAQSLLADNSTQDMYVSFTHRELPPTVAVALGIFNNTEFAGAANINATMPLTKQNYQRAWKSSRILPFLTNIAIERMTCDSYGYPAGTYVRVLVNQDPQPLECAVGPGDS…
KZM23316.1	>ST47_g5515	MKTVAIAVVAGALATSVAGSATPVQKRADVTSITVKGNAFWQGNKRFYIRGVDYQPGGASDAKDPIADEAGCKRDIAKFKELGINTVRVYTVDNTAEHDTCMNALADAGIYLALDVNTPKYSINRASPQVSYNKEYLQSVFATVDKFAAYPNTLLFFSGNEVINDDATTNCAPFVKAVTRDIKSYMNARKLRKVPVGYSAADVESNRYLMADYMNCGEDAVRSDFYAFNDYSWCDPNTFTGAGWDQKVQKLGNYSIPIFLSEFGCNTNKRQFNEVKSIYSTDMSSVYSGGLVYEYSQEDSNYGLVKIDGSSVTELADFTTLKNAYANATDPSGDGGYKSSGSASTCPSSSTSWNVTISADQLPAFPSGASDYLKNGAGTGPGLAGAGSQSSGSQETALA…
KZM23378.1	>ST47_g5472	MILRLSSLALGLLPLASALSPADIPADTPVSQLIKDASVKLASGDTQDALVYFDVAISRDPKNYLTFFRRGAAYLSLGRTQQAEHDFDKVLDLKPGFEGALLQRAKIKARKADWLAARKDYEAANKSDEIAQLDEAQGAAMIAHEAAAKGDWDACIQHAGTAIVVAGGAYDIRKTRATCRFEKGEVVEGIADLQHLLQMNKGDIEPHLQSSAMAFYSLGEPDKGLKHIAQCLQSDPDSKPCMKLRRREKTLEKSMKKLRNNFERRQFATASKLLIDRGEEEPGLLKEVKQDFQDYIQAGYIYKNSPQGLYTQLVEMTCEAYNEMNNMKKGTPYCTDALTLNPDSLHGLLNRAQRELEADNFEDAIRTLDHAKEHHQHQRIQELLQKAHTLLKRSKTKDY…
KZM23388.1	>ST47_g5489	MKFTTAAIAAAAAALVSASPCGKSTNDTEIKTGDVFRIMSIRPGSDIQYGSVQAANSGFLVNAPKQNASCSEDVNYASFLLTEAGELFLNTANPPQQAYVDRSGMGQGLFQYTTGVQGAPRNSERTGFTLDADSNLIFKDQTNQEIGFQACPSAAQGGYSVWLNSVHDPAGYKDCLNFVARAIKEDKPISCMYTSS
KZM23399.1	>ST47_g5427	MYFALALLSLVSIFSRSLAYHDLSDDSLKSLPSPGDDFNIKTGALLAPILRPRVSGTEGNVAVRQHFIDFFKTHLPEWRIELHNSTSTTPVSKGKEVPFVNLIATRDPPGTNEGDVSRLALVAHYDSKLTPKGFIGATDSAAPCAMLLHAARTLDAALTKKWAGGAGDDLDVGHKGVQILLLDGEEAFRSWTDSDSLYGARALAEDWESTFHTAASTYRTPLDSMELFVLLDLLGSAGPRVPSYFKTTHWAYKHMATVEDRLRKLKLLRSSPNHPDRMAKRENKKPRAEPHFLYEKNKADSSFMGGFVQDDHVPFMARGVEILHIIPTPFPRVWHEIEDDGEHLDMDTVEDWTKIVTAFAAEWMELEGFLDFKAERRRDSVVEKSELSMKLGNRAGVLL…
KZM23406.1	>ST47_g5444	MLSFSLLLGVTSVISHLPRSFAAVQQLPHQVYNITGVEPPLAVAAVTATVNITTTDTSTITATTIATSVITTTLPPPPPPVSTLTVIYPSSDAVPVEVTSISQVVTSYIPEATWCIGPALYFASVPGAPFFNGSANVTQYVSGSSSCGVEYSTTTTTICATTLTGLASKVTVSECDQEITFSSECGYTLETPTPTPATTSPSALITAAPTVRRLMTYWLAPWQSLTAGEAPSDVDVKVCTVLDDGNMKCQRYQEVWEIVVVTSTVTTSFPVTFSRTLSGPGALIFDSSTSYINSTTEFISLSKTLRLETEVTIESTSTVTRSVVDPSLTSQEPASTMTITRHLEHVSSTPQPASSSSPETTPSTSLADASSTADIPSSSSSSSSSSSTTNESSSTPEPT…
KZM23412.1	>ST47_g5442	MGFRLSTTVVRLTPLRLLCAAVLLCVLYASSALPDLAPYGRRGYDDDGQARPEQVTMRFGEECSPFSAGAMEDVTVVVKTGAGEAATELPAYLNRLGRCKQDLLLFSDRKASVQGFDLVDALSHLRPEYRWANADFDVYDSIQAANHTPAKAPDGRKLDKYKFLPMMEWTAYLRPDSHWYLFIETDTYVNYDNLYRFLARFNPASAHYFGSPVRPKKKAPFAHAGSGFVLSRAALSKLMARGRMFAENHHFPGTHFFGEKAADSCCGDELLAQVLKKSGVPLRGYWPMFNADKPATIRFGPEQWCDAIVTMRHLHQHDFTALSQWEEARKHPERPLMFEELFTVVEPRLQDKAEDWSNMSDDVVHKKGVPIKSFEECERACLKDSKCMQFEHTGTECRL…
KZM23420.1	>ST47_g5433	MKFGTSLALLASSLFSAVRGEAVPWERIDKNNSLLLILDLQVGLYQLARDWDPTLYKENIMAHAELGKLFDLPVIMTTSADTGPNGPLPKEMLEMYPDAPLIRRQGEVNAWDNSEFRAAVKASGKQQIIVAGIVTDVCTAFLALSLRAEGYSVFANIEGSGTTTQLIRDTANSRMEKAGVQLVSLFSIVCDLMRDWRATPGAGEVLPFLDKYLPVYGMLARGHAAAIENGTVIPGEAGLITGQNGTVLI
KZM23428.1	>ST47_g5455	MKAAVASLLALATAVSAQVKGFNYGATNNDGSCRGYSDFVRYFNDAKSLSGASGFQAARLYTSIQCGTAAAPIEAFRAAIDTDTKILVGLWASAGRAVYENELNALLQASRDLGSAFTDRIVGISVGSEDLYRSSPQGVANNAGVGATGAEIEGYIGWMRDWIRGTGLESKPIGHVDTWTAWVLPENRGVANSVNWLGHNSFPYFESTKANSIDLAAENFRTAVAQTEGVAGGKEVWVTETGWPRVGPNSRDAVASTENSQRYWKEVGCSLFGQRNTFWYTLKDANTAQTDLSFAVTPLENNTPYFDLTC
KZM23430.1	>ST47_g5453	MSFFRVLLFVSLALFNFTAATSRPIAIARPPLETGSVHRRGVPYNEVKYIKYFDVGGSRVTWAYNWDSRSHGDIDAWFEFVPMLHSNRADQTGKWAEDVRAAAFANKDAPTHLLGFNEPDNCEPGMGGACMDLGSSIAAWKQHMEPQKSLKEKMYLGSPAVTNGPNGLAYLSSFINACTGCSIDFINIHWYDEASNAAYFKKHVEDTRKVAAGRPIWITEFKPRGNDEQIEAFLDEVLPWLDTSSDVHRYAYFMATTGDGFLIDNGGNSLSNVGSRYAFGA
KZM23453.1	>ST47_g5417	MLCSTKLVASVVLAGVVASQHAITANGGNFTLTGDDSSYLFHVNTENGDLISDHFGAPVTDFIPPAYILPWGWHDSRANDRREFPDVGRSDIRLPAIHIEHSDGDTVSAFLYQSHEIVPGKPSIAGFPATYGGDADVTTLQVQLYDNVSAVGAVLSYSIFPKYNAVARSFKLTNNGTGDIVVERAASFSFDFPNLDFEVIEPHGDWYHEFNTVRRKVDYGETSFRSTEGYAGHTHNPFYALVSPSTTESGGEAWGFNLIWSGSFEATIEKASNGYVRALLGLNPLHTSIRVAPGGTFQSPEAVAVYSSSGIGGVSRAYHDLYRNHLSRHKATHETRPILLNSWEGLSFNINDTAIVDLAGQAADLGIELLVVDDGWFGRSYPRNNDSLGLGDWTPNPVK…
KZM23462.1	>ST47_g5391	MKIILSISAFVLGCLAVPMPGSDIAPAELHSPQHQDETAWIRRQLGGLPIVGPLLSGPTPVATAPVATIGDPAPETPAPSPAPGLLDPLLSPLDPVLAPVESLLAPVVSAVAPVESVLAPLITPLASAIAPVISVVDPVLTPVLSAVAPVVSELLGAADPLLTPVVSAIAPAVSAVGPLVSEVLGAVDPVLTPVLSLVAPVVSAVAPVVSEVLGAADPVLAPVISAVAPVVSSVLGVVEPLITPIVSAVASVATDVLEPVASALQPVESLLPPIESAILSPVGSVLAPVVSQVASLVSDILDPNGSAVAPVNTATVSQSSSVLVIPTPIITPTDTLPIPSSDPTPIEVGPIDITLPTDTASSTDTALPTDTALPTDTALPTDTALPTDTALPTDTIVSS…
KZM23463.1	>ST47_g5390	MKFFTSSILVAIAAASPITLPESEMTQIQARQLGSSKSELESGSSSACPKAILVFARGSTETGNLGTLGVPLGNALERRYGAANVWIQGVGGPYGATLADNFLPRGSSAAAIREGVRLLNLANTKCPNSELVTGGYSQGSALIAAALTDVPAAVRNKVVGTVLFGYTQNLQNRGGVPSYPSDRLEVFCALGDLVCSGTLTITAAHLSYSDEAGNEAPAFLISKIGA
KZM23484.1	>ST47_g5365	MFKLTLLTLLLTSTLSFTSATFPSHKIRGVNLGSLFIVEPWMSRRTWRDMGCGDAASEWDCVVALGQDKANTVFQKHWDTFITADDFDKMKEYGLNTVRIPVGHWFVEDTIAPGESWPRDGMKYLDNVVGIAASKNISVILDLHGAPGVQVPNSAFTGHTLPGAGFYSPPNYDRAHTFLRNMTERAHTHASYASTFMFQVLNEPEHNHDSLVTDYYPKAYQTIRDAEADLKTPSLDRLTVQMMDSSWGAGNPRRNLPKGATDLAFDIHRYLTYSSTPATKADYLRASCTDAFDSSDNDNDNDNDNDNNDNDNDNDNDNDNDKPLVIGEWSLAIKQDSEWSNEFSPTKEENHDWYRKWWAAQVQAYEKHKGWVMWSWKTELGGDWRWSYSGAVEAGIIPK…
KZM23485.1	>ST47_g5366	MRSTMRALAALASAASLFAPSIAQTYTNCNPTVRTDCPPDSALARTVNIDLSSASDSFTPQSNPTYGNDGVSFTISKSGDAPQLTSKWYIMFGKVDVVLKAAPGAGIVSSFVMQSDTLDEIDWEWLGADPDEVQTNFFGKGQTTSYNRGAFHADAGSQSGFKTYTIEWTPEQIVWQIDGVTVRTLEPANAENQYPQTPMQIKFGAWAGGDPANAAGTIEWARGPTDYSKGPFTMQVKSLKVADYSTGSTYSYGDTSGTWKSIKSNGGVIYSGGDRPVNSDSPQITATATGAPLPFSPSRTSSDYERPSVYPWIPGTSSATPEPTFGNYPGLPSGWTVSDSGKVLPPSSAPPSPLASSTASPAASQSASSGDSKPIVWTGYDDRGFTTIYTSYPGTTQAP…
KZM23487.1	>ST47_g5360	MSSMTKISLLALIGAAAAHPSYGGHYKFHSHSKPYPTGGWSGNYNSTQVPAGTASYSQDKTSTIDVTSTSTKTIYSTVYPTPTSAVVENVSSKATGQCGPATVTITSTEKATVTVTPGASSAYSASLVSSVVALPSKAGEYDASSYIVVSSTPAAEKPTTSSKPADVTSSKPVVTSSSKAQYEAYTPSASLPAVTSVAQTDYSTAVPTSSVAASSAAASSSAAPKPSGTPTYSGTKRGLAYNDGELCASFGSNFGFAYNWAQTESKDVGAPFIPMMHKISDSTAEAWLANVDKAVKAGSKAVMGFNEPDIVAQANLTPEAACSGWKEYMNPIASSHPDVTILGPSVSNSGNDGQGLSWLSTFHEVCPDAIVHATNIHFYDIYESATIDRFKAQVEKAAA…
KZM23497.1	>ST47_g5355	MRTTASQLLLASLALGSAVTRGDKKHHGISKDDFIKVDGLRLYDSKGALHYLTGMNYWACMNLAADDQSGGNYSRLVTELDQMAAKGINHLRIMAGSEGAPTPQPFRMNPPLMNAPGQYNDEIFKGLDICLAEMSKRGMRATMTLSNEWQWSGGFGQYISWANNNTQIPYPESWNLTASPQRSTPGTGWGNYTKQGVDAAPYSEFTGFANLIYNNSLAEGWYKDHIKTVMTRRNTVTGRLYVEDPTIMTWQPANEPQAANALGYVGIGLLPNPDDLLFPWVDRTTAYIRSLAPKQLISLGFEGKQGEFYFKHAQNFSTIDYATTHCWVQNWGIYDMYNSSEANLKAAQDFAVTFMHNSSKWAANIGKPVFLEEFGMARDNWENKDKDYPYLSSASTTHK…
KZM23504.1	>ST47_g5378	MFIRIAQLALLLCFALLVLGAEDYYKLLGLKKDASERELKKAYRSLSKKFHPDKNPGDESANQKFVAVAEAYDILSVEETRKIYDQYGHDGIEQHKKGNGPGQRHDPFDLFSRFFGGSGHFGHHGGERRGPSMEVRVAIPLRDFYNGRKTEFTIEKQAICSACEGSGSADGHVETCDTCGGRGAVIRRQQLAPGLFQQVQMQCDACNGKGKTIKNPCPICHGSRVVRESETHELDIEKGMPDGVRITYENEADESPDYVAGDLIVHLVEADAALGAQDHERTDGTFFRRRGPDLFWREVLSLREAWMGDWTRNVTHLDGHIVKLSRKRGEVVQPNTVEILKEEGMPVWHQQLENNDGLQYGNLHVEYVVVLPDQMEKGMEKDFWGVWDKYRKKSGVVLD…
KZM23556.1	>ST47_g5333	MISTLILSTIITLATAQQVTMTVPYVFGDANSVAASVVGANKDATTFALACMSADCGLFPKNILVVGRSTYHVDMSDPNTDFTATQDCVLASSSAVCKETAGGSEANFPGSSTTTYEGTEIGKLTLTVTAGTEELVLTGSVAGSSSAIASQTAARSVPSSASTASVTPMPGSGSAAASSSASRTGSAPAQASTAGAAVNGMVFGGGFVGIAACVFGGLLL
KZM23559.1	>ST47_g5330	MHIVGCTTVFLLGLPNIADALRFGKWCPRACDLTLGYATFNDTDPWLSRKIRQCRSELRVSSLYLCFDDFCDLNDGEVPRYIAETSEWCDEHAGVTLPSLHDVVDHWTPEDRAQLPRLSAEKALKWPVLSSVVFLDESFFERGFTTLDAAFFEYDIHVVYGWYMYYFWIVVVSFGVCFRLLALLTKTKSREWSAALNDENIVPKNQRGVLSLPNTWLKRYITVPAAFGERCSQPVGWCTIPPRAQSLTIAAFIILNIVLCCASYRLTDGNLYWPKKSDQLLRFVSDRTGIISLANFPLVWLFGMRNDVLMWMTGWGFGTYNAFHRWAARVATLQAVVHSVGYTLMILDNDGWSNFLKYWTKHYFWNGELATIAMCLLLALSFYGVRRAHYEIFLVTHIA…
KZM23585.1	>ST47_g5269	MKLTLLLAIPSLASALAFNPFRPTGFEPTRTSDTATQKRSDSWGGLGCSWSFQNGMLFLWPGMSNGTGDLVQTTLESWTGGNSWCGAQPGQWCIRSSLFGSFGQLDGPASPVSGNMKVEILYELLSDGQTWKQTATDLGSKKQLSTYSHKSGPYMTGYGTGTECDQACTGTIAAQTYTNTVITLAGSDPAFGKTISASNGATYKGLTNTGNGKVWTIAEMHVPKILSTFDVTPDDSASTTRHGTFRMVDETVKMRKTRIVCISDTHNNTPKLPAGDVLIHAGDLTNQGSFDELERAVAWLEKTDFEAKIVVAGNHEITLDEQFYEKKGARWKWPAPQSPRGCMKLLRESKTITYLENESMTVCLRKPAGPHTWFRVFGSPRTPGPGKWAFEYQEQDAQG…
KZM23592.1	>ST47_g5247	MRLPSLLSLFFATTALAALPYKGIDWSSLLVEEKAGKTYKNSAGQTQPLETILKNTGVNTVRQRIWVNPSDGNYNLDYNIKLAKRAKAAGLKIYLDFHYSDNWADPGKQVVPVAWKSLNREALIKQVYDYTKTVLNQFQSEGIQLSIVSIGNEITAGLLWPIGQLSNADGPKNVAALLKSASKAVKESSLSSKPKIMIHLDNGFYWGTQQWWYDQVLGSGGGLSLSDFDIQGVSYYPFYNSDATLGNIAYSLSQMVQKYGKEVQVVETNWPSSCPNPKYAFPSDTSFIPISAPGQYVWLQEVAKRIAAVPGGKGTGIFYWEPMWIDNAGLGSSCDWNLMVQTDGKVMEGMGAFKVI
KZM23595.1	>ST47_g5244	MAAHPFTATAIALAIALALALALAAVDAQPSQPSTPSPSSRVELLNGGQHVGQHVGQQTAPPHCRHESTARRHKKLLALPEAPSYTPSRSEPSLVFNPPSSAPSVYHTPLKFLPKDDKRRQLYSAALSYANTTALRRQSSPVAAPGTPLSTGSHLPPRPSASLPAPVRAPYEKKYHLDDAQIQEIRNLRLGDPDKWTRVKLAEKFGCSQFFVGMVVKVPEKAERVSQEHAAAREKWGKRRKMAREERERRKVLWGRDL
KZM23601.1	>ST47_g5277	MKYSLIAGLLAVAGANCKPTSHIESEAVPVENLHTVPQGWTAIGTPAGHRKLPFRIAVRSADSNVLERTLMEVSDPNHARYGQHLKRDELKDLIKPGAESTKAVLSWLERSGINSRDIKNDGEWITFHAPIERAESMLGTTFKTYQNEVRRDVKRIRSLSYSVPKSVRDHIDMIQPTTRFGQIKAERSNVLTQEAAPFSVAAVNATCNTTITPACLSDLYNFADYKIDPKGAVKLGVSGFLEQYARYADLEQFTSTFAPNAGSNFSFTSVNGGKLDQNSTDDSVEANLDIEYTVGLVDPTIETTFYSTSGRGILVPDLDQPSEADNANEPYLDFFTYLAGLPDGELPQVLTTSYGEDEQSVPATYAKKVCDIIGQLGTRGVSVIFSSGDTGVGSACQTN…
KZM23605.1	>ST47_g5279	MFAIKASLLLGAGALVSAIPTGLDARASCTFSDAASAIKGKASCTAIVLNNIAVPAGTTLDLTKLKTGTTVTFQGTTSFGFKEWEGPLISVSGTKITVKGAAGHVIDGNGDKWWDGKGSNGGKKKPKFFYAHSMQQSTISNLNVKNTPVQGFSVNGATDLVLDHITIDNTAGDKTNGGHNTDAFDVGSSTGITISNANIKNQDDCLAINSGTNIHFVGGTCSGGHGLSIGSVGGRSDNTVKNVVIENSKISNSDNGVRIKTVSGATGSVSNITYKDITLSNIAKYGIVIEQDYENGSPTGSPTTGVPITGLQVSGVTGTMSGKGAETYILCGKGSCSNWKWSGNSITGGVKSSKCSGIPSGSGAAC
KZM23609.1	>ST47_g5257	MLKTALGLCGLLICAVAQTDSVKVKWLEGTPDYLGGVTFGLPWPRGQHLANATTFTASDDAQLQSWVTAYWPDGSLKWTGHALGATDSPADEYTITASGPGNATFPSLRRQSSNSTSGVQVSESGDDIVVNTGNVTATFPKSGDVLVSSIESGGKVVGNNGRLILRSQSGTPDDDEDGKPTGIDYFSFASKIHNTTVSEENSARALVTVQGIHTVDGESSHADWLPFTVRFYLYANSEAIRIIHTIIYDGEAKSDFISGLGVRFDVPLAEEEHYNRHVRIAGVDGGLLHEAIQGITGLRRDPGAAVRSAQFSGTETADKATWDQRVTSRLQWIPTWSDYRLTQLSPDGFNLKKRTKAGQSWVTIPGGTRSGGLAYLGGSSVGGLALGLRDFWKKYPTSL…
KZM23614.1	>ST47_g5258	MQLTSLQTIFLLIPCVLCATYYVAPTGSDTASGTLAAPYKSIQVAVDKAVAGDSILLRGGTYAPTKNIQIKKSGTSSARITLAAYQTEVPIVDGEALTGTPAPVGGSIASADRGVLHIEGASYWTIKSIQFINGPYGAYATASNNNIFQQLVTRQNYETGFQLQGASANNQILYLDSYENRDPRKNGESADGIGVKEGTGEGNLIKGARLWNNVDDGLDFWEFKSKVTVIDTISWGNGINRWGFTDFQGDGNGFKLGGGDEADKKAANHQLTNCIAFNNAAKGFTDNSQPGNFVLQRNTAWNNGDVGFKSTTAVTTFTSNIAASNIKSTTNSAQVSLNSAQKQTGNSWQGSTTWNNAAFKSVDITLVQGKRDATTGKIAASDFLLPASGAAIGATTVWS
KZM23617.1	>ST47_g5216	MLFTTILLAGLASAAPALSSREATTGLDPWEITSVFAGRPSGRPGSGTNSSLRINIKQPNTINVRQAPTGQAVLPPFEASCTWSWVAAGKNFPVGVETLCIPGSYGNFTMTLSGTNQADFTVAIKETREVNVLQQRFVRIFDGDQAFKVGDGLWRQNCGGSGVCSWQVAAGSLPIEVHQELTESIGSCEDTGSC
KZM23632.1	>ST47_g5238	MRISGPILVLASCALSQNFEPADFNVTEALLNNGVNVSTLPDLPDIAERSALSGCSVACNSLAVIFGSNVVLEGSANYTSFSKAYWSAQQQAVSPHCVFYPTKALDVSTVVLLSRLTQCPFAAKSGGHAAFTGASNIEGGITVTFQKMKGLKLAANKKTVDVQPGNTWHDIYSGIEKSGLGVVGGRVAPIGVGGLTTGGGISFFANELGWACDNVESYEVVTASGLIVTATPASYSDLYWALRGGGNNFGLVTNFKLRTLPLGKMWGGDRVLLENQFPAAIDAFVNLGKNSAQDTKAAQILSFVVQGGTKIASVQLEYAEPNANASIFAEWNAITPAVDNIGIHTLSELTEMLAASNPYGERQSYWAQTYKLDKDLINYILQVFYEEGDKIADVANLLN…
KZM23635.1	>ST47_g5237	MAPVLSFLIGSLLAARGLAEPFEKLFAVPEGWKSSGAAADSQVLKLQIALQQGNPEAFEQHVLDVSTPSNKKYGQHFESHEEMKRMLLPSEDASSSVAAWLQAAGIEDFEQDADWVTFKTTVGVANKMLETKFAWFTSDEAKPRKVLRALEYSVPEDVASYINLVQPTTRFAAIRADHETGKEIFGLQRIEVAANANVTVNCDTAITPQCLKQLYKIDYKADAKSGSKAAFASYLEQYARYNDMALFEKNILPEAVGQNFSVIQYHGGLNDQNASTDSGEANLDAQYMLGLAQPLPITEFSTGGRGPWVADLDQPDEADSANEPYLDFLQNVLKMSQKDLPQVISTSYGENEQSVPKSYALSVCNLFAQLSSRGVSVIFSSGDSGVGSACQSNDGKNTT…
KZM23639.1	>ST47_g5233	MHSTFILSLLTSVVSAQLSSNNLEKHVGSLTLSSSFGPVKESYWTGYPHHRRTPFAVSPDGKSAYLAYLDASETGVHVQQVNPSTFAAVGDAVTVTGGKEAGGLVAHNDGFALLTNEAMPSGTSNAPPESTPVAVLYRYTSGKETFKTWLGGPSLSGDMGMLASPDINGDLAYSEASGMYGAYIVVTAYSGSAQGHFGDAIQYVNDNGTLEQIQGASSSWGCSHNTGIAFEGSDSVPFPSICSEDQGAIWLNTGGTGMQNNGVKISNENVTNGAGNEAMGGMSGSYSGLARFQGSDSYIFSWVSRGAKDLTTNDWMGAGYTHSVNRTVNRNVAIATMSDKKTLVGKQATSELVADGDSQINWITTGSADCSNAHVATFDKSNALVTWEEIAEPTCDYIA…
KZM23646.1	>ST47_g5214	MKGFSALLLLVFAPLSYAQSQNGTDVLAFAVKNLPPCALNCTLTIVKSSTCALTDIECIKGNQKLIDNLTTCVKASCRPKDALTARRFLTKLMDAPVRNKTMQGTLTSLIVGGMAVLAYILRIVARLTWFGGNWGFDDWVMTAAIIITIPLTACAILLNELGMGTDMWLVSFENITKILQIFYYTELLYLASIALTKISVLLFYLRIFPHQGLRRIIYVTIVICAMYIIAFVTATALQCLPIRFAWERWDGEHHGKCVNLNADAWASAAVNIILDLVVIIIPMRELSKLAMSRWRKIGVMLMFLGGGFVTIVSILRLKYMIQFAHTDNVTWDYLPIGYWSAVEAHVGVIVACLPAIRQLQRSICERIWPKQDTARRLYYEENSRDSNKKNGSKYFKSRI…
KZM23648.1	>ST47_g5206	MRCDVAITAFLASGATAAAVKKGFVTTKGTAFKLDGKDFYFAGANAYYFPFNDLAADVEKGMAAGKKAGLNVFRTWGFNDRNRTTVAGGLPQYGGEGAGPSPNVLQWWNNGTAEINLAPFDKVITAAEKTGMKLIIALTNNWADYGGMDVYTTNLGGRYHDDFYRDPKIKAAFKKYVKAIVQRFKSSNAIMAWELANEPRCGADGVRNLPRSESCTPATITAWIDEMSTYIKSVDREHLVTWGGEGGFHVASDDWAYNGADGGDFDRELALGNIDFGVFHSYPDWWSKTVPWTVQWIKDHAAAGRRAKKPVVHEEYGWLTDDKRLEYLGKSDNQTRADVLGLWQKTSLKEKMSDMYWQFGYSGFSYGRNHDDGFTIFLEDAEATSLVYEHAKKVNALN
KZM23652.1	>ST47_g5204	MYLNSYLLFLAAAAGINIAKADFMVYTELPIPTSAIPSFANSVDAAAWTTSVALNARVAFRSFTAALGEPYQSSSSSAASEIAAFVSTASNYSIPATVTESGTATFYGVPTWYSALPSGARAFKEQQVEDQFSIVRQVIAARQTTSSSSGGASIPTAAPFLDKKFGALAAAAAAVFLTTNGAWQKPAVIFSPGAGKNAITYSTLSSELASQGYTVLALDHPGEAPYLQLPNGAPGVYGIDVAATWNYISMAAVYNMRIFDTLAIIRKLLPSYVESIGAPFNTTHYFAIGRSLGGAAAAGALAVEPSILGGVNLDGLFIDLPDVKKPFLMLAGAQHTPALDVSWSPFSANQSGWYHWLNVTGTSHQDFSDLGDWVDLQGLRNKTITPSLGLIWAPRMDFI…
KZM23654.1	>ST47_g5202	MRSSTRFAVALQLLGISTALPSNNPVEIETRASDTYDCVVVGGGVTGLIVANRLTEDAKNSVLVIEAGGAYDNPNIRLPYGATYALNTSLLWTGYVSQPEPALNNKTWNTRVAQVLGGGSVVNGMMYDRGSAADFDAWEALGNKGWGWSGIYPFFKKGTEFIPPPQELVDEFNITWDPSAYGAGPLKLGIADFQYPDIKSYWAAFEGEGVRRLVDGNNGDNAGASWYPNTMNPKTGERQHARLAYYDTVASRSNLHVLLENVATELVFDTNSSKKLVARGVKVTDKKTGTTKTVYAKRELVLAAGTVNTPKLLQLSGIGPKATLEAAGIKVKLEHDGVGSNFQDHPYTSMGFTISNMSTPDPTSLSKDPAFNASAWAEYNGNKTGPLTQARGNALAFIS…
KZM23692.1	>ST47_g5156	MRFSIIIPLLSATVLAVPVIEERQATCNVPTTFPTTTNAKLPSPFKFFDGRTVTTKADFECKNQEVSAALQAQELGVFPPKPSSVTASLSGSTLSIIASEAGKSITFTVSVQKPSGSGPFPAIIAYGAASLPIPNGVATIVFNNDDIAAQQGQNSRGQGKFYNLYGSGHSAGALTAWAWGVDRIIDALEITPSAGIDPKRIGVTGCSRNGKGAFVAAALVKRIALGLPQESGAGGAACWRISDSEKAKGKNIQTASQIVGENVWFSPRFNAFSTKANTLAVDHHQLAGLVAPRGLLVIENEIDWLGPVSTTACMKAGRLIYKALGVPDNMGFTGSGNHNHCSFPSNQQADLTAFIGKFLLNQSTNTANIERGPGGADVGTYIDWTTPTLT
KZM23698.1	>ST47_g5150	MLVPFFIAAIAAIPAVQAQDVTASVTRCTTRFGMFPAPTGASLDTWYNYATTTNSFAVTSTTQETTTVTPSATTFTDVVNITSTFFTTSTSVPAAVVVPTAAGFFPLLTAMATPAATPMGRYKRALIGSRSEHIHKVKRQTAPGNTAGFIVSADGSTSNLNRIYPQRVVCRVAVTVNSTATTIVTGLPKTEVLVPATATAVSTATFSVTETIIEVVARPTTYAACEANNVVSHVPGFDNEQIYFDRIVFRPTEGFPAANSLVVNTTSAINCCIACQNQPFCAGSFYAPSRQACHLQLTQAAPAPAPPSLPASNSSLLIAAASGAPYPIPGNETVILYATASGMAPSGLSTMVPIATPISDGGMSIQPISEPASTGTPSNPGSGTCSIGSLSLYLGVARG…
KZM23702.1	>ST47_g5192	MLTITSKMIIAAVALQLATTNAFPTPMGSSPSDNTDLIAQLLTTPTQIKRYRKLLTDSTGNKLLDNDRLTNATIWDFLQNSNAVPGGQGGSTSSANLETFPFLINSGVTMTMGTLGPCGIFLPHIHPRANEFFVVSEGEVDFGTLLELGLFENLTPNPEVGGKLGKNMGTLFPMGSVHYQLNNSPGCKPATIYTVLTSEDAGSTPVLMDPVPGNATVGRVKRVDAGNFESVRAVTPSHIARIVDECLARCYD
KZM23703.1	>ST47_g5191	MRTPALLSLAVLSRHALTQRLQYDERTTKDCIGWADIYDSSVDTCESTLREWGVEPKRFHAWNPAVGLDCTPWFNLTSYCILTNETIEDSVYYTTLSLSDYSHGMPLASMTTDSDGWRIPVTKSDAKSHTTSTIAPIPSPSTWKDMGCYVDNWNDGENGIRTWILDTRWLPRDPEETVDKCKEKCHKMQYKIAGLKLGDECWCGDSNNGTLAADQKECNMPCGGDAKVMCGGTLRQNVFGAVDDIDESSSASVSTAVTASATNGGSAATGPTATATSGARRNLGLFGMWRR
KZM23720.1	>ST47_g5109	MKITFFSVLFAASAIAAPSSSYPTNTTSGPDENGKYEISAEGIRGLFIPYGASISNLFIQGKDGVERDVVLGFDNASYYSVDPVHPHFGGVPGRYANRIKNSTFNIDGVDYHITPNENGGADTLHGGLDGWDWRNFTVVAHTESSITFSIVDPDGKEGFPGEVISYITYTMSPNTWNIKIVALATTKKTPIMLTSHTYWNLDGFANPDTPTALNHTLHLPYSGQRVGVDNILIPDGTILPNEKYSVNDFWSSPKQIGANLTAPELLGNCGYNCTGYDNCYAVNRDQSGPFDWRNSGPVASLSSAWSGIKVDIFTDQEAFQVYSCGGQNGSLPIKSTQGLDSRRRTVEQYGCVVMEVQDYIDAINQPEWQREKRQIFGPNDPAYTLEADYVFSTES
KZM23723.1	>ST47_g5141	MMLGRSLPPALFSLLLAAARAAATPYDFKDNYHDPAPSPEDGPPASFYTTRDRQRLPYEICGLVGGYVLTVLIWGVLLLTLGRKMRRKALDPPPALEWEQELKPIRGVMDTPISPGSVRSATSWMRRFKRPESLSGSTPVSPVVQSPMSFDQQVLNADRARAQDDMERLYAAVMDHDAKKHSRQASREVDEHMAPPVARSERRRPSAISTTLRAPTDSSPVSPVKAIYPPDYNNASAHSRNSSLRTELSPPSPPSILAKPRRLSSASRQDKSARFNLKNLRISGPIQSYGGAAPDDEARTPLSPRFYPNPGAPPSPPTQPTSPTTPYSPTEPAEIQRAHSLRIPLPHPAPRRGPSMTIAPPSPLHLHTTRSPTMTPTTQLPFRSYQTSDAPLQSPGIQT…
KZM23728.1	>ST47_g5146	MSLSFLLVAGAVAGAVAGAVAGAVAGAVAGAVAGAVAGAVAASSRATSTQLDASNPGSSRSASWPSVGNRMRREALMNSEAEGSVAGVTASMRHWTRIFITLRTSAMTIFADKAALMALGLEAVRPSSALVYQDCYICKNPLQVNLRTAGPSYDAYHPAVRVVACGHMHGQACLEAWLDTGSSCPTCRKKLFDTPGYSVSQADIKSVVRKLGRLVSIERVRSSIARVMSKQELERAQLRRTREREQLQKAKEKKARSYQDDLMDDDEWLDSGEEDFDNGEDGDSDSVLEEDDKESQSPTA
KZM23731.1	>ST47_g5138	MKYALALLALAAAATAAPTASPNAAPEAAPEAAPAADGYGKYASYGTYPPPKDGYGKYASYGKYGAAKRDAEPEATPADGYGKYASYGTYPPPKDGYGKYANYGKYGAQKREAEPEANPDGYGKYADYGSYPPPKDGYGKYASYGKYGAAKRDAEPEAAPADGYGKYASYGTYPPPKDGYGKYASYGKYGAQKREAEPEPAADGYGKYADYGSYPPPKDGYGKYANYGKYSAKREAEAEPKPEPEPEAQE
KZM23745.1	>ST47_g5116	MRSTACLLTLLVSTVFGQSFVPSSTWNYTYPWPVKYHNLTSQRLNLSMAYMDVAPTSYATNKTILLLHGKNFCGATWEDTARRLSTQGYRVIVPDQIGFCKSSKPPSYQFTLQQLAFNTNSLLQSLSITKAYVLGHSMGGMLATRFALMYPNVTSHLILTNPIGLEDWKALGVPWRPIDLLYQDELKTNYTSIRNYQQATYYVNTWKPEYDVWVNMLVSLYRLPGESTTFAYNMALTTDAVLTQPIAYEFGLVKAKSLLLIGTKDNTAIGKAWSPPDVQAKLGNYSVLGKETAAKIPGAELVEFADLGHSPQVQDSERYHQALFEWLRRVQ
KZM23746.1	>ST47_g5115	MAFFATCIAVVASFVTLTSGSPADAMGAAVTSNSKSSLTLIYQNNLNGSDDRNHIGALVLDATPGSNVAAACAALNEKPLSKASLQQHQSEFIKALLYQDYARYNDASKGFYIDNGTVAVSKQLTFASVSGSSNKNLPVLCTQSANNGSSNARPVNGSEITLASNGNTFVGYRNQKSFRFLGIPYADTPQRFKYSLVYSKKGQTIRATSYGSQCAQGGSGSEDCLFLNVQTPYIPKVGSKQKLRPVMFWIHGGGFTGGSGADGLSDGGNLASKEDVVVVSINYRLSTLGFLAVPGTDIEGNFGIADQITALDWVVANIAAFGGDPKKITIAGESAGAGSVRTLLGSPQAIGKYQGAVSMSNLGGGVTLGLKGDYGTTYSTYYTIDQSYAVAGPQIFAAV…
KZM23755.1	>ST47_g5095	MFFKSVVLGGLLAAGHAAALKLGDVNGVLRRGEDLEEVLRRDAGLLATLTQRQDANAADTAPLAALTPASGDASKADLQKWEEQTRAACMKTLGNLNGQASNPSGIAVCYNVPFLDKSTGVFQAELRMYNVSAPVDPWQSVTAAEVSMTLSYLGATVQAMNMNNTKREVSEERARARWSDGTLVKRQTISGMVELKTLMYVGKINSNLMGPAMTQEALQPLLVPQIDLAARNPSTNADVTTTLSNKEASFVNGVFAQKADANAPSNADPTAAAAATSAAFLAAPFVVPGTALAFFPIGLLVTGIWSVFFILSVGLGTYGRIQFRDQYRRRMNAEKARGVRTI
KZM23769.1	>ST47_g5085	MAPLTRLIALAASLAVSSATTIAEINGNKFLSPLKDQTVSNVTGVITAKGPDGLWIRSTTPDRDERTSDSVYVFGRTFGANLTVGDAITIGGKVLEYRSNKDYIYLTEVSNPVLEKVVSKGNKVSPLVIGKDTGNPPTEQYSSLDGGDVFAVPNNKSQISVANPTLEPKKYGLDFWESLTGELVTVKKARALTKPNQYGDTWVAGSWKVTGTNDRDGLTTTDKDANPETIIVGSPLDGTKNPTETRMGDSLEEITGIVTYAFGYYRILPSTALKVTGSKKPLSPKPTKLESKNDCGGITFGAYNVENLAPTSSHLPHVAEQIVDYLRSPDVVFIQEVQDDNGATNDAVVVSANLTLSTLTKAISAAGGPNYTFVDIAPVDDKDGGQLGGNIRVAYLYKP…
KZM23779.1	>ST47_g5075	MPVFSRLAVAVQLISIIFTPALAASTPKDYDYVIVGGGVTGLVVANRLTEDKHVSVLVIESGESVDSPGNMIPYKANDLTSANGLMWDGLTSLPEPGLGNATYDVLVAKVLGGGSVVNGMVYDRGSAADYDAWEALGNNGWGWKGMEPYFKKGTTFQPPSPAVAEAFNITWDATTYGNGPLAVSITDNQYPDIKDYWAAWKATGLHVPEDGNNGEAYGPSWYANTMDKKTGRRAHARYAYIDPIAQRTNLKILTKTTAQRIVFGKKMAATGVEITDDATGKTSIVNAKKEVVLAAGAIQTPKLLQLSGVGPRSVLEAAGIPVKVELDAVGSNFQDHPYATVVFNTTPVHYPSANLLTTNATFNASAWAQYETNKTGPYTYARGNALAFISLPDMTSDVS…
KZM23782.1	>ST47_g5063	MHFSTLLLPLYLMGMAASSPIQATDAIPNVELSFIPTKDIAVRDLPDSAIGSPPVDEKAPQRPVRYYSTTFRAGPGVENAVETHMTIRGIAVIVTAHFANIHNLIVLITPSFPNTPLSFLAGFQDFSKEFNSPLINWAFDKYRTMSPPSGEIFQYDDYFRFFWDA
KZM23784.1	>ST47_g5061	MAYFSKPQSLTTMLFALFAFLHFTVALQHGSHHHRARHSADAVIKRQMDEIADSLVARQSSGFTAVTGVCNTNTGSDGACNSNGRVSAPRLEIRQLKQNADQWNLYLLGMERFQAKDKNDRLSYYQVVGVHGRPFTTWNNFPTPLLNQAGFCPHAQTLFGSWHRPYLALFEQAWYQNVQEVIKTFPAGQQSRWNQAAATLRMPYWDWAQDPGAGGATVPTLIRDQTVTVTKPSGTVSIPNPLYSYSWGNTLPTEMGGGPWNNFPSTLRRPVASPTRSNNNEMNARFNSMRVSLRDRVFALFSSKQAWGAASTSQIGVRTDLSGSGVDSFESVHDAVHNTAGGETGGHMYYLDISSFDPIFWLHHTNIDRLLAMYQLIVPNTYVANGNINHPMAQWQQGE…
KZM23786.1	>ST47_g5067	MKSIVIAGAIAAILGTARGRPLNLKRDYITEIVYITETVAAAVVFVDQDGQPYSTSTMEQSAAATSLGVVTTSDAAPTEAPDVFSSSAPVIVSSAAPAPLPSSTALPSFSLAAPEPEPSSVQIKDGSTTTSSTLPAPPAPTTPPPAPESSSPPAPPSSVVAPVASQAPQPDSSSLPIGVTYDPFTGSEGNSRCKTGAEIADEFSRMSSYKAVRIYGMGCNIIPLAVQNAQKNGQTLMGGAYLSNQGNGEDLSTVIATWKNAIDQHASGSWDILKLFAVENERVNDHDMTASEVVDAIRRGRDQLRGVGYEGPVGAVETVPATIDNPSICQASDVVMVNCHPFFDQNTAAGDAGPFVKAQIERVKTACNTARVVVTETGWPHQGDANGKAVPSPDNQAKA…
KZM23794.1	>ST47_g5056	MHLSLLPFLSVAASGAVAEKLLYRNTFNSSAAISSWVAEGPVTANVTNNTLTLGGAGNIDDYFVYWLPEIFPDRIRISWDFQPVQEPGLAMFFFGATSVSGGSIFDPTLKPRNGSYPQYHSSDIRLLHASYFRRRWPEERAFHVANLRKSPGFNLVAQGADPIPDVADTQGAYYNITVVKDKREASFYINGLEIFKFDDTKTDTGPVVREGRIAFRGMQPLIAKYRNLEVWSL
KZM23802.1	>ST47_g5073	MALLNIALSYLVLTSALVQGQDDLGLSNGYTTFDVGSLTGDIVKSSQTLASLNSTENKFDFLPSDRLAQLAFNGAHHLGDITLRYRTSSGGAWTSVDSASARKPVTPLNITSQDVVAAADLTPTLPNRLPVKITREWLQYKDDFAVRFNITNNGNGSVELGSLGLPVSINNIFTERPAEETQEKCTFADPYIGLDAGYVRVSHLEGTGNALVITPIAAAKLEAWRFLGEPEGNFSYQSQTFEGNYEWQIHSLAYAQEEWNSSTPWNEATSKILQSGEVYSVGLRFSVAENIQTIEDAVVKAGSPLAVGIPGYVVPADSVSRLYLNHTSPVKSIDAGGNFIISELSSPAPAYKLTPVASAWGRVRVTISYEDGKTQTVHYKITKTAPSALADMGHFFSTA…
KZM23819.1	>ST47_g5003	MHITPRTLQTIAWSTLAVSAARAQYIIDNLSFGHKDGVYISPDLRAIPHFDVQGIDDYKPQVLSDRVILTPPYPGSKRGALWANNPMHHGGDWTAELDFRATGMERGGGSLQLWYVKDSQAHDSPNSLYTAPKFDGLVLVVDQYEGHGGSVRGFLNDGTKDFKLHPNLDTLAFGKCDHAYRNRGHLSTIKLRHANGLLEVTVDGDACFKTDKVKLPQDYYFGVSASSAENPDSFEVHKFIVSTTNSHTREEPNHERIPDARNQQHQQPVQNQPHQESAQQQHAQQQGSPPKKMASSQQIPPWIQDVLASNVKTQDDQFADLHNRIQDIAHHVSAVYAAIEALDEKAEHRHNELMSHLAPLDDRTAHNVRLSEKTETTAMQILRDLESKDYKDMIGQMHR…
KZM23835.1	>ST47_g4999	MRNVMISAICIGLLACYAEANAVFAHFMVGNTAHYTQGTWETEMSLAQGSRIDAFALNVAAAESMNEDQIGFAFKAAQARGFNSTFEGPDHVHEWNDIKRQFNCFFVPDWSSKGAAIAVGLSDGVADGLFNWAAWPDCGSKDTYVDASYKNWLWRGEALWYERWVQALHVQPEWIQISSWNDYGESHYIAHIRGDASLIALDAKYGQAPFNYVRGIEHGAWRAFLPYLIEFYRSGTASVSQEGLTVWYRLQPRPAGCNDGGTTSFTATRMQPEEGYFNFNPIVYGLMGPGISPRSPPMKIDKDTPCIKGTGIGDFKKLCENACSFNYCPIEACMCTQWGKDRGVGLVRGRPGYPAAGRDSNFEGLRAVTCSYGIVGVCPADKTSVVSDQKALDQICAFG…
KZM23837.1	>ST47_g5053	MKISANFICAAFAAGLVPKTMGSALPLPKSIPWETTTHNILLSEIGPFNLTPQSGASNPSSGALDKRSGYSARVCKDISAQFTPQTGGVWHFREARCDRSGTDINTFRVECFGGRNWIEHLPQRKGQCGPREWCVDYHGRNAKGDQANDVFCVNRKDIHTWVANTQTRQEDVVTCSAGWTNDYKQTAYASLEVDVMDSAGINAIAPRSIFYKLNQKLIGISRGNDPFVGSGTIAMPPGSTIQACVTAYAAQSQILNILGAMVAFSLVKT
KZM23845.1	>ST47_g5013	MRRLLSVPLFLSVSSALWPIPKSYEHGDTVLWIAKNVTFYWYQAGARNVDYHPEQAPFLFAANSNTDVHPQDSGGHDLSLHTRYTQPFDDYHPERGAEGVKGGDIVDYAIRAAWKTIFKQGFYPWKFHARNWEEPAPGKKARYIDHVDIRLLASEPSDVAKALAGEVDESYTLSLTDAGVASIAANSSVGIARGLTTFTQLFFQHSDGKQIYTPLAPVTIYDEPQFEHRGINLDVSRTFIPVPDIKRQIDAAAYTKMNRLHLHATDSQSWPLEIPSLPDLARKGAYRPEYIYSAADFADLQRYAALQGVQLVTEIDMPGHTSSIWYSAPDLIAAYNQQPDWDTYAAEPPSGTLKLNSTAVDTFLDTLFADLMPRVAPYTGYFHTGGDEVNLNAYRLDSS…
KZM23850.1	>ST47_g5038	MQHGFSVLLLYRLLGTFVDLTIAQATCVPLNNLQILPECTDECLNTHTRKCDREGCLCGDDLMSWCETREGPQIWFAQYGYCVLKGCPDDGDIESLMAIFTLLCEGSVGGPLNNDTVPLPLGDYAVKNTAKTTATPASSRSESQSLATLTGVIPAGTGTVASGSLSSNTAVTVSDSTVTELDDKASSMSSAVNTASSSKTTSDDQPVLSTAAIAGIAVGGAALLALIIGGAFFILHRYKRNKSTKLASPPVYEPADEKHAYGKPELDGQALEYQYSVMGVGAPTEYAELDAGAPLSALDPQPSILSSRQQQTLAMSGIVQPLVGGIQATVSVILTISFGVAFSQFGLLDADAASKISKTSVKVLLPCLLINNLGENLNPETAHEYVPIILWAIVYNVLS…
KZM23916.1	>ST47_g4832	MTIISCFKYGLLITCLLSPVTGLFHVPFWSGSKTTKQVRQQVQITELPMECEMIHRQLAPSNNTRSIGYLVIIANLEDMADVKSEQIQPLKPAWTLEQFQQQFQDAKTSVNNLAPGASVMFDEYRRFQLDIADCLADNKRKDEVIDGLKVEVSTTRADHKADKAIIDKLEAKLNDAQVVIQVQTQERTMMCANMTGLEMKNEMLLQRLQKSAEGVRIVAELGNMHF
KZM23951.1	>ST47_g4918	MKSYSAVVALAGLVSSVAAHGYISSPTPRMPGDGLKAACGDQVYNQQSSDHFGNVQGALQNLQGSHPDCRMWQCKGVPFADAGEVFSYTAGQVVPMKIEIRAPHDGVANVSVVNIKTDKVIGKPLISWDKYALTSSPMSEHPDWTSFDVTMPDVSSECAEAGDCVIQWYWDAPTINQTYESCIDFKMSGRSGSGSSSGSGSSPAPASSSAPAASSTATPTKPATPSAKPTAAGSSSTLPEQFTIEQFISWLEANAGSSAVQKLRRAIQARTARTHARAFSG
KZM23952.1	>ST47_g4919	MHTLALLPVLFGLPCMGTLVNRQFPHLIIPVDANAPDVAPGTRLSGAISQQKYTEISFDVPSNDAEWCQLQFYLNTNSSKGAPWTLSGQAPYQFNVSSLPPTINKDKDTWNSRPQPIKTVATVTLTPAGKATVGGGAVHPCPKGQVAQFLLHPASDDRDFDFTWFELDYPSAEGGPHGIVFDMLK
KZM23962.1	>ST47_g4856	MRFSMDIYTVVPLLFGTHVSALNFNPVSMVDPNKAKEYGIGTAALTCCIVSLLASILCMYWFCRMEKRFRHRLIVILIYGDLMRGTWLFVFAIISLARGTVRTPSTFCQVSGFLVQYGTQTSDYAVLVMALHSALQVFYPSTLVSSDGLYPYRRYVYVGAFAIPILMAGLAFINPVNAYVSQGAFCTLPIRPFWYRLALSWIPRYIIILIIIGLAIAIYAHVGFEIRAYSNVDQSLLSLKTSDDSTTRQNDKQNDIKMEDITFELSTMQPLPNPQNNRPSAGHEIFTPQHQASSAPGTNPFTTPGMHRVSFDNDNVARSLPGSTLNLNRSRTDAIRPALFATISDCSVTAPVSPLNRDSRSTGRPDNAEPTAPPLSSSTSTRLSSPSSAQDYPAKQRQR…
KZM23976.1	>ST47_g4869	MYRSLALTSLTFLSAVRAQQVGTSQSETHPKINWKTCTGTGGNSCTSKAAPVVLDSNWRWSHNIGGYTNCFDGNSWNTSLCPDDDTCAKNCAIDGADYSGTYGITTSSDALTLKFVTKGQYSSNVGSRTYLMETDTKYQMFNLINKEFTFDVDVSNLPCGLNGALYFVEMAADGGLNKGNNKAGAKYGTGYCDSQCPHDIKWINGKANSAGWVSSPNDANAGSGITGACCPEMDIWEANSISTAYTPHPCKGTGLVACTGTDCGDGDNRYKGVCDKDGCDFNSYRMGVKDFYGPGAKLDTKAKMTVVTQFIGSGSSLSEIKRFYVQNGKVYKNSESAISGVTGNSITDSFCKAQKSAFGDTSSFANLGGLNAMGASLARGHVLVMSLWDDHAVNMLWLD…
KZM23996.1	>ST47_g4885	MKSQSMLLTALASAPAVLAHTAFTNFYVDGIAQGDGVAMRMSTNVDHSTAPISSLGSDDMACNVGGSKGVSRVQSVSDGATLSFEIRAWPADPSRERLDRGHKGPCAVYLKKVSSAIEDTAAGDGWFKIFEHGYDASTERWCTDEVIDNNGLLNVKLPASLEGGNYLARPEILALHAAKDNDPQFYTGCAQIFLESDGNLVPESTVSIPGYVDYGQPSTIFDIYNKDASTYEMPGPKVAKLTPNPAVTASSGQTAQTEGQKPAGCLAENANWCGKEVSDYTTEKGCWASAEECWQQSEKCFDEAPITGNAGCKLWQTKCQGINDQCDASNFQGPPNKGKVLVQEKKKIDVGAVLAGGIDSSDVDTTPKPSKKSSAAPAKPTTTDYSSPDIVDSEATPSY…
KZM23997.1	>ST47_g4882	MHRCILAALSSALLAETLLAAPTASSCTATDYSQVSAVVASCTEIILDNISVPAGSQLDLTKVNPSTTVTFAGTTTFGFKAWKSPLILIGGTDFHITAASGAVIDGNGAAWWDGKGDNGVEKPNHFIQVKAAGTHSLIENLVIKNYPAHCFTLGGSNLVVKNVKLDNLAGEAPNKLSGGAPAAHNTDGFNVKATNVLLQDITVINQDDCVAVSSGSSNVTVRNASCDGSHGLSIGSVGSDTTIKDIFFYDSTVKNGENGVRIKTVSGATASVVQNIVFQNITLSNLSKYGIDVQQDYLNGGPTGNATNGVKVQDVTFKNVTGTVTSKAKDYYILCGSGSCSNITFSGVKVTGGTEDSCNFGKLC
KZM23998.1	>ST47_g4883	MLFSRLFTLVVLALTSPAFLILEGQEEGIYAVKYIDGRSVHTNIANATVYRHFPESYFKPEASRNSRSRRNHNRSICDIDRQCGNGSCVGSGLTFYAIGGDIVAFYCNFGNGSTCTAVAQGSTSRSITGKWFAIERGFIRMAFDLRLKIPKIEPASYNSTQIDIWCPALSSQEASIDTLTNDIKRKLDNWSVGSNRPFLTNDWKRVEWLIQSCLSERVAPDYKLQFHPIIAFTVTCLISEALMFYIAYSIKDDPHMTTEDAIWSCVDDTDATVECISLVEPSESMVGLDTGYRLWHDVEFEWLNISRHKREFFWMIADGRVNQLVGTLRPSVSW
KZM23999.1	>ST47_g4880	MAMTQLLHLPLSALLLLTCALTVSAHGGEHSQIEVAPDADWATRHMAEEHHISGYDAATFFSLHDYDSTGVWTAPDIRRTYGLSDPSSQHISEMKKQMVVQTILDMFDIDKNGEISLSEFVTKDSMNIKLPDFGMGPGHHGDDEYEYEIHHWEKYHSGEDVKEEDLTHPEDIAHFKLHEQKEAAQEEWERLEKGIVEKNIPAKYRQN
KZM24000.1	>ST47_g4881	MGRSSIHLILYFFLHFLSASAFVPEHLISDFPSKNSRGLRTIASNVAAGAWISYKETHICETTPGVRAFSGYIHLLSYLLDDFGGAAEYNASMFFWFFESRNDARNAPLSLYLGGGPGTTSLMGATSENGPCYINSDSNSTRLNPWSWNNNVSMLYIDQPVKVGFSYDSLVPSVLDLLTGNVTQAQGTEESNSISVIGILPNQEPSSAANTTTNAARVLWKFTQIWLQEFPEHKSSNDRISIWGNSYGGHWVPGAMAHFQAQNDKIPHNGTLDGVHARHLHLDTLGLTNGCVDAKIEGSYYPQYAFNNTYGLQTISEDVYRGALTNLTKEGGCYDLIERCRSLAIFELGQYGTNHTVNEACATATLYCFQYVQGAFTANSKRNPFDISRGSKSPLLIDY…
KZM24001.1	>ST47_g4943	MVSFTSLFTAAVAATGALAVPVTDLATRSLGALTARAGTPSSQGTHNGCFYSWWTDGGAQATYTNEAGGSYSVSWKTGGNLVGGKGWNPGAARTITYSGTYSPSGNSYLAVYGWTRNPLIEYYVVENFGTYDPSSQATVKGSVTADGSSYKIAQTQRTNQPSIDGTQTFQQYWSVRQSKRSSGSVNMKTHFDAWAAKGMKLGTHNYQIVATEGYFSSGSAKITVNCA
KZM24021.1	>ST47_g4908	MKSQLLPLSLGAVLSLSYVAASYDDGIQEPLRAAIDPNKYRAACPDYKQYSMRPHPPYSQGPLELPFQRPSKYCRTFESPLVEKVIETMNKKMVDKDLARIFENAFPNTLDTTVRWHTDNTPAHKSFQRNWEKGSWTGPQSFIVTGDINAEWLRDSTNQLAQYQPLAKKDKEIFKLILGAINTQAEYVIGSPYCNAFQPPAPSHLSPTFQDQADVVHPEYEASFVFECKYELDSLAHFLSLSNQFYNHTDSIAFINARWLQALDTLLSVLDEQSQPTFDETTGAYIQNTYKFQRRTEIGTETLALGGVGNPLAGGTGLVRSAFRPSDDATILGFLIPSNAMMSVELKRTADILNKAGRKNIADQLSAWADTISKGVWEHGVVTHKKYGRVFAFEVDGYG…
KZM24040.1	>ST47_g4817	MYLSQIFFAALVTALPSILFDRAILPEVSIPVDFSFEVQVPTTLTSTSSRPLALLVNSYQFSIPQTSKSGTLVSWLANYAAGNAYNTQVTSIDPSAPRNITTISQSTSKDGGNSFTNATALADGTKARVVTTSFSSGNAASAAAGALDGTGTTSTSSSGSSNSTAVAIANALGDVIIMTSANTVTALDSQSIMNARGAETASSCAADSGPAASAEAEVVNELLIPIGESPNGSNMYWLKSSAYAACAAGVDAPSQGGSSSSGSQASLTGVKSTVTCNGITSSQQQTSTTFKVMVRGRYTLLKGFSGAVGGQRVASSTSKC
KZM24061.1	>ST47_g4821	MGKLSYAITALLLGVPSVISTPPRPHLHANAIVQRGANDTPAATGILPGAYIVEFANGDETPESFYSSLAQEGVQVEHRMDLSFRFFKGVSFQLKSSSSNSSGSDFLRQMKAQPQVENIWPTRILTRSIEDSVAAPSQQKHVKRQTTSEDTFSPHVMTQVDKLHAEGITGKGYRVAVVDSGIDYTHPALGGCFGPGCLVEIGYDFVGDDYKVGQSEPKPDDDPKDNCVGHGSHVAGSIAAQLEGNKYGFTGSAPGVKLGAYRMWGCSTTSTNEIELMAFARAVEDGADIISYSNGDPSGWAQDMRAAVFSRIVDSGIPIVMSEGNDGGQGLFYASTPATGRSITGTGAVSNTQFPTFLERGSYKTSANVTTNSTNEFSFLMGVPEFTADTTLPLWSAAD…
KZM24070.1	>ST47_g4757	MLRSFAACALAGAAAVAAIPTLSVKGSKFFTSEGNQFYVKGIAYQLVPDDPLLDATQCGLDAALMKSIGTNSIRVYHVDPAGDHTTCMSAFADAGIYLWLDLDTFDTQIEQRAPTWNESQRDAFAAVMDEFQQYDNLAGFFVGNEVLTTANGSVAAPYVKAAARDMKAHREANKYRSIPIGYSAADIASLRPMLQNYLACGSNASEALDFFSLNAYSWCGDSDYKTSGYAMLEANATAYSIPIFLSETGCQTVRPRTFQDQTAIFGDMADTWSGSIIYEWIEEANNYGLVSYGTKVDPASPSAPPDGFPRSGTPIPLQPDFSNLGNVWKTLSPTGVQESAYKPTNSAPECPDQTSGVWDVNPTSALPTLGQVYSAQPATATAGASGSGSGSASGTARPS…
KZM24071.1	>ST47_g4755	MRLPRAFSVVLASAAIVSSSIVPRYNNDIGYKLQTGPLDTPWTADVGTNPWPEHPRPRVQRSQWKNLNGVWRWRNVTAGQVSSPPTGQTLERAVLVPSCLESALSGIMEKGHLYSWFQTSFDIPSDWPTGNRVLINFGAVDYEATVFVNGKAVGFHRGGYFEFTFDVTDHLSNNGTNELLVHAFDPTDTDRYQIPIGKQTLTREGMIWYTPCTGIWQTVWLESTPKEYITKLDLAAGADGNVNVTVHSSTNSSTPYQITVHELGSDVAKATATGNSGAPFIFKVDSPDLWSPSTPTLYNITVQLADDLISSYTGFRTISRGVIDGVQRPLLNGKFEFFWSPLDQGFWPDGIYTPPTVEAMRYDLEKLKEVGFNAVRKHIKVEPALYYKAADELGFLIIQ…
KZM24084.1	>ST47_g4753	MPSLRQILPVLAVAASVEAAMGPSFSTGPVGGNSWIRESTSTLILPKSPKINNDSIASLWVGMGTSNGDLIQSIADSTNRDEWSIYAYTLLSLSANTQMPVQTAGTDAAEGDKITMHYKFDDATGNYTQYVFINNKKLPTLSTSDGHAQGWGSAVECPENDCGTMPAHKWINTVITLDSADPNYDQTLSKGQGVSGDMSTNDGGVTWKVTDINIPKFTFGQ
KZM24094.1	>ST47_g4780	MLSRTLTSLALLIHVTTASYAFYVGKALTEDGSVMVGGTGEEVSSHWLEVFPAKNYAPNATVEVGVTEDASMPGQRLNISQASHTFRYLSMEYSDYEGFPAPLTNGGVNEKGVAVRDVWAQNRDELIAITPNPQTGLQYSDLARVVMERASTAREGVEIIGQMIAEYGYADYGGNSHLIADANEGWVVWEMSGGQKLWAAERLGPDVVRVLYPGYIEEFPVDFMNTTDYMGSPNIATFAIEQGWWNPNGTEPFNIWKAYGSQGGNYTARNGGYKYMSQAALENATLAMIPVSEKDLIERVRDYRIADDEAGYGQVVSLHPNMDPDLIHIWVAPTGSVTAPFNPWWLGVASVPPEYGQHRYLTADAASTFLDTDFQYQEATYFAGRIYKQALYYTCSDPE…
KZM24103.1	>ST47_g4764	MLLLCTLFFAVANLLRFAAAQRVFAHVIVGNNGAYNKDKWISDIRLAQAAGIDGFVLNMGTPWRGTIETQVSLAFQASNEVANEFKLLFAFDYEGGAQGAWPAADVKTVLSAYIENYSYAKHPYTRFQNTGKAIVSTFEGSNNVGDWASIKSQFSSRGIYFIPEYTSRDPNWHRNYLNTIDGVFSWNMWPNGPNDMPTDPATDPDVAWKGVNGQYMMGVSPWFFTDLPQYGKRRLWRGDDLWHQRWEHVYDIKPQFVQIVTWNDFGESHYVGPIFDAGIPDAPEGSAKWYVNNMPHDGWRALLPHYIATYKNGGVEPAVTTEKLSYWYRVYPAAANPNGVVCNAPWQTTFSPATCLQDKVFFTALIKSLPAQISVQIGSNSPTTFQATKQGLNHLSQNV…
KZM24104.1	>ST47_g4763	MFKSDIALLLSTITALANAFSIAVYSDASRAADTPKSQRGVGLLLNGTCGRVRSSGPDKSFAHWLSSGNDEFILKDIPQSIFSAFNENIRPRLPQTRHIRLPLDTIPDQRIFVYEYLNNDFLNLVRNQIPVRARKEILNATLQGIADMHDRDVVHLDVKPDNILVNYRHVEKQVIIEKVQISDLENAAYLPKPWCIKGMLAGNDNWRSPEGHFKGELNKPSDLYSFGLVCIYAILGRVILGPDDDFKLHESKGALPAFIRLQRQVSYFGDKEGLNGLIKYVGDEEANCEILRMLWEERAADYIPYVPLSEWTDVDSTFKDLIRGLNNLNPSQRLTARQALDHPWFKGIETT
KZM24106.1	>ST47_g4761	MYFRSLLGLAAAASAVVVAAQQDAPPRLDLDWALTPDKTADWYKDHKKPVPEFAPEITVVEEKNSYVVKLDCSDCPFLVKKSFVESSWQKQENSLLLKFDVKDALSQPSPIPTLHINGFPVLPLGAMPLYINAHQVAANLTQETMNNMVRERLLDPDFGWQTKYHKFPLQYEHVLLRTETPGQWWMQFDVTGLQYGADGEPVHFGENHKLVQILVKHVKSTEDSDEKLSIEDIQVVETAQRVQAIRMKCGKLAMVKTLFDPNEWDEYGKLGSWSREWNMVFGKIGQYWEDHIQHNALLMPVALLLAFFIFFVRVWYQKRQQEKTMDAEYALLESAHDDLPPAYSDIPIIKIEEYD
KZM24108.1	>ST47_g4749	MLLTSIGLMLALLNLTAATKEPLQVAHYDDIKNVNPAIGIAPPKPYKFLQYIGYGLGAPVPGTITIQASSAKNAIFAPYLLAGAPLVMPVVFSNYTDSKVLSFDLKSIADGCYAATQNGILAPAINCTIRYTGTKRDGKEVVYDSVYGTGEILGLALHAIPVKSHEFPVLDFSDLVQVKPKIIKATLPNLLGAVAQMAFDDMTYEVTLK
KZM24125.1	>ST47_g4696	MAVKTYLACTLALLLSSLGNAVVVPAFVAVPSLSGGSSLVVTSASSVGSATPASELVSSTASLSSTASLSSTASLSSTASLSSAISSSSTASLSSTASLSSAISSSSIISSSSIISSSSIISSSSTVSLSSIISSSSTTSLSSAISSSSVISSSSIISSSSTVSLSSSVSPSASAAAYLLTCEGKDAGSTFTHTTSKGTYDVTCGADYPNGDLKFLWTDSFDACVAACDEESSCLTVAFRSGACYLKNQLTTSVSDAGIWSAKKHDAVTTPSSTGPTCIDKASDATTYRSSSGKNFKIVCGREYYGGDLTSASTTSFKECIDTCATTAECVDVSYVNGACYLKRSTSTLMDAGHVWTAELIDLASTTTSMASTASAAPTTSAATEKKELTCIDGKDNQK…
KZM24140.1	>ST47_g4719	MKLTTTIVAGLLAALGSGLAVEQRATKNKPVFAHYMIGQINPEHSRKDIDDAMKLKIDAFALNFDQFQSWSTNTVSDLFDYADTVGFGLFFSFDHNGVLKTPDQYENYLKDHVQRKSYYKYNGRPLVSTFGGDNVKDAEWQRLKDVVNPAGAGNILIVPGFFQNVSPDNAFTNRNNIDGVFNWNSWLPTYEGKKRVSMVEDNAYQNKAHAAGKVFMMGISPLQYKNIDKGNNWYRRGEDNLEYRLGQALELQPDMLQFQSWNDAGESHYMGNTWPESMTLAKEIQANIKDRPHTAYWPIMKAFIQAWKAGDTTTANMVPTNGKPVEGAFWHHTMTVDANCGTEKQPKSADIKTAAEDAVSGILLVAKGKTNLVAVVNVNGNKLDQKNLKEGYNALKFTG…
KZM24156.1	>ST47_g4700	MGLFAKVFLAATAVASVGAVDVVVQSDGGNQTGKFGHQYGYGFLHEDINNSGDGGIYAELIQNRAFQYSRAFPVSTAHYFPINGASLTINNGTQPLSKALPASMKVAVGNGTVGKIGFENEGYWGMDVRAHKYTGSFWVKGAYTGTFTASLQSNLTDDVFGSVEVESKSVASEWTEHTFELTPERDAPNSNNTFAITFDPTGTQGGSLDFNLISLFPPTYKNRKNGLRVDIAEALAEMNPHFLRFPGGNMLEGLENDTYWDWKDTLAPLKERPGFQGVWGYQQTHGLGMMEYLEWAEDMDLQIVIGVWAGLALNGDVTPKEDLQPFIDDALNEIEFVRGSVDTEWGAKRAALGHPEPFELNYVEIGNEDWLAGFPGGWDSYKEYRFTMFHDAIKAKYPE…
KZM24169.1	>ST47_g4721	MARYSFAFSALVAIAAAAQGTAYSQCGGDGWTGATSCVSGFHCQYQNEWYSQCIPGGAATPVKTPTAVKTTATAKITAAAKTHATTLLTITRSSSIPTPPAASPSKPTKSDGPVPTAAGSTSGSSGKTQYAGVNIAGFDFGCSTDGSCGGSYVDPGANGIAQMKHFATDDKLNVFRLPIGWQHLLNNQLGGSIDATVGAAYDNLVQGCLATGALCILDLHNYARWNGAIVGQGGPTDAEFADVWSKLATKYASEKNIAFGLMNEPHDLTMTSWATSVQAAVTAIRKAGATSQYILVPGTDYTSAGSFVQNSGPALLTVKDADGSTSKIIFDIHRYLDSDNSGTNAECTTDHVQDSFVPLATWLRSNGRKAILSEVGGGNTASCEQDTCAAIASINKNSD…
KZM24176.1	>ST47_g4662	MLLFAFTSLVGLAACLPSSTHTQSKKPIDDLIVTRVPDHVRPYVVRAYTLDGYLVGSQIYRFPVTGPSSDYAFTLISTAAPASTELGVLPHAHKTHYENSYCLKGRYALWTNKDNVTSGRILTPGDYGAVPHDTTHSFQLLDPFVELVGAIQPGGFEDLFYFLASANYSSSTNSPFPQGNFTEPGGDPSLITKLESYDVYAQLAFSPPTNFGANGATEEDAIWHSGANALGKDSQTPFFVAKGYGPKYLAGDKSSSFAIVEPFITSKQSDGNFTEGTITLSKPVSRSKPTTYSLPGHTALEVVDGLVSVHVGGFEGATTLSVGDVVFVPANTNFSFWGESVYSKVLYFGVGEDTVDARILQNAKEWDSVTWPHSKIPSWLEKLNVEIRRVDYMSEESLV…
KZM24177.1	>ST47_g4663	MRLIHQLFVIVLLTAVALARISSGAVSGLDFVTKPHVKVFSYEDIMAATEPVSPYANSQVPITAGEGTDSIYTADVRMSGDETRQHVGQISGQRMWDVVHKRLLEICPYERGPIGCYEDMPGAGLPEKDGKMKQSYYSECVISKVPYKTKKGEYASNARLTVKARATFRDAKYPGLGAATVSRAMTGSSLLTDTPTDEMAAGVYAQVTENKANCYNLAFNEPSRPYEFCNVPRYVLVALPTKGPVTDSWLSIEVVFSGLADQGTLDCPGSKSGVTDFWETAVRPDIAKLMVHPEGQWDTRTACEDNKDCFDVEKWRDCN
KZM24178.1	>ST47_g4660	MLPQQLLLAALVAVSVSAVPLNINLGAYSPALVVGDGEISLGSKESASELMATLASGAASKGGEGQQQGQQGAQPAAAPAAEPAKEGKPAEEKPAAKRSMNLRRAVNQLLGKRAPTPAEGQMAAVEDAMQWIKRDLQGFNAALGYAKEAMKNSPKIEMGSENAGVGLVVSPGVNVPQNSAANGAAAGGKKAKRDEVEVEDEGGDAPKMTLVAITEV
KZM24179.1	>ST47_g4661	MKFTIFTIAIFATAFGAPVRRQTGNVQTFTSALGGIAATPVEDSGNPSRPFQVKDDTFANIGAALARSCDQQFNACANAANEGDVTLSVAQCSTQKDQCSASIQASTAGAQGNAQADGAGDADSAGNAGANGNDSGNDNGNIGGNSAAAGVAEVCT
KZM24180.1	>ST47_g4666	MYFTKSSVVAFSLLASSTLVAGHGAIIKATGDAGGAGSAIGVDPNTPRDGTNRNPFQQDSTRFRGDAAATCGETLGAGANDIQAGTAQVMQLNGPTLPQVSPGGSLSMTIHQVNSDGAGPYKCMIDASGTGANWVPMTVTQNLPGNDRGRNKDTQLQDQPLNVQIDAAQTCTGTVAGQSNVCMVRCQNPARAGPFGGCVPVQMAGAAAAAPAAGAAAGAAAGAAAPAAGGATGAGGATGAGGATGAAPAAGAAAPVANGQTAGATTGSNTASSPAQRRKNAPALTDDDQQEELDLVDGEF
KZM24183.1	>ST47_g4665	MKLTAAVNVLFVSSAFAGVVKRQTPFSDGQPIDGKGKGAPILDVENPSNLGQQSTDAGTVSNLKWRFSDSKTRIYPGGWVREQVDNDLPQSHDIAAAQQHLKKGAIRELHWHRVAEWGQVLFGRVLVSAVDENGRHQVTELGFGDIWYFPKGQAHTVQGLDDENEYLLAFDDGNFDAAGTTFNLDDWLAKTPKSILAKSFGLPESTFDNLPKTNPYIQNSTTGAAARQKNITGGAGELVGEASYVYRTFQHAPEPAPGDDRVDSEEWLYFHEGKARATVFTGNSNARTFDFGPGDTAVFPDNSGHYIENTSETQNLTWIEIYKADRVADVSLTQWLALTPADIVADVLKLPLSVVEGLKKEKQVLVHAIPNINTLSVRT
KZM24193.1	>ST47_g4682	MKITAILSLLPLAFAAPAHVEKRAGPTVVAPSPQATVLGKSASNVESFNAIPYAQPPVGQLRLKPPQPLTSSLGTVDGTGTARACPQFFFSVDPAAFPGNVIGTILNTPIFQAISDAGEDCLTINVQRPAGTDADAKLPVLFWIFGGGFELGGTAMYDGTSIIADSVAQGKPVIFVAVNYRVGGFGFLPGKEILADGSSNLGLLDQRLGLQWVADNIAAFGGDPTKVTIWGESAGAISVMDQMLLYNGDHTYKGKPLFRGGIMNSGSIVPADPVDCPKGQLIYDTVVKAAGCSSSTDTLACLRQVPYEKYLQAANSVPGILGYFTVNLSYLPRPDGTAITQSPELLVEAGKYAKVPFIVGDQEDEGTLFGLFTPNLTTTREVTTYFSTVFFNNAQPAQI…
KZM24208.1	>ST47_g4657	MVSRRSQTLLSLSIFLGVLAWNVAAAAVKGETSAVPVGQLSAHEIEEQLQDCSLVKALNEHKVATHPTTSSLSSQIFAVLFPGSPAVNALLATLYISGPPNFLLALCPPNIDPASLSVMVAFAVGGLLGDTLFHLLPEIFLGEDEPNHVKFVMVEPNKNLLLGVAIMLGFVTFVAMDKALRIATGGAGGHDHSHGHSHEKAEASAKSTGIETNGSEGTVRARKHAANDAAVATEKEKEKEINASVKLGGYLNLIADFTHNITDGLALSSSFYASPTIGATTTVAVFFHEIPHEVGDFALLIQSGFSKRAAMGAQFVTAAGAFLGTCIGIAVQELGGSSATAEVPGGGLWGTSLQWGDMLLPFTAGTFLYVGTVAVIPELLETGPNKSEELKKTLTQFAA…
KZM24211.1	>ST47_g4654	MEVRRDPRSFLFFIILLLLINSPEPQQPSYNTRTRYDELIQREWDQLDVLNRTRWGDFNVGRKKWLNVSGLRDEDGFAWDRLPGVQEKANAHGQRALGDKWGRVLDGTLDELDDGGITLPVYRNLSGYVQGEWVRDPSSRVRHPSDMGNTTHPAKDPFTNSAMDFDRNLTGPAGPVRVHITELEDKMRTDANKTISEISAKIVVGDDESFGGNWWEFYVHGVHFKESGHAVLTTTSERFAGIFALPHFQLSSRLYDTSRDFLNWTIHETIDRQIHRTFPVWNPWTSSAAGSNEDMIGVAHHCEFVLYLQQPPSVQAVDMDWLEHEMRYPTGAPLGHRSQLSMSMVGFSPDCGYVIESKGPPDFPPSEAMHLVGSKLEDYNSRARHSIVAFAIAFAFQLS…
KZM24219.1	>ST47_g4636	MQDFSFMSGRNLPRVLSSSLLFTTLIASAAAQDTTTLGACLKDKNLQFTAAKNPGWEKTTSPWSLRFNPEPAAVVTPTTSEDVAAALACAVASEIKVTALNGGHSYGAYGLGGTHDGALVIDMVNFDQKSYDDGTQLLTYGGGSRVGPVVTWLWENHGRHFPHVRANWVGLSGSSIGSGFGTTTRLLGTPMDNLDSVEYMLYNGTVVKASRDENADLFWVAQGAGSSYGILLSLTTKTWKPEHEQVTNFTISLPSDTSIETGVDALLAVQEYAQTEAPDTFALRWSLATSWSGSGFFYGNPEDFNSTIAPLMERLPNTTTLTTSTADFWTMENNATPSLTGTTDTYPPRTMYLQALVLRADQPFTYESALALYEHTTFAFNRTDMTKFGFLDLWGGSPA…
KZM24223.1	>ST47_g4588	MKSFVSSVSIFTVFLSLLASTQAAANSTDGPSCRVAKADDSYFSVVGVQGTGVHPRQELRELEKDTDMWNLFLQAFARFQAMDQGEKVSYYKVAGIHGVPFGQWDGVTGQEGQEMMGYCPHVSNMFGPWHRPYLALFEQVLHDRAVEIAKEYPAGEPRAKAMAIADKVRLPYWDWAMDPPNSDEGCMPASLRRPTATVTYPNGTTGNIANPLYRYDFHPLKYDDFTPLSEFQFKNWNHTIRFPVDGFALNATSRNDAANERISKQQPNNRDMLYKLLTMYQPFNQVSNKANGGTIGNFETLHDGLHNSFGLGHMGIVEVSAFDPVFWFHHANMDRIFALYQHRYPDTWVEDAAQAKGTFTVAKGAVEGPASPLAPFHMNALGDMWTSTTSRNWTSFGYT…
KZM24228.1	>ST47_g4587	MRFSSNFAFALFASTTLALTIPKKTTALTAEPFYTLELAPGETKQAGVKFMDITEYSDLHDHAQKHSFAAAAAITFPTAVTQKVSVSPLLSELSTSNIKTGLTTFSNFQNRYYKSNYGKQSSEWLLSQVQAVISASGATGASARAFAHTSWTQNSVIATIPGKSTNTIVIGAHQDSVNGASPSTGRAPGADDDGSGTFTILEALRVMLTDEKVKSGQAPNTIEFHWYAAEEGGLLGSQAVFTDYKNKGRVVKAMLQQDMTGYVKPGITESVGVITDYVDVGLSTFIKKVITAYCTIPYVETKCGYACSDHASASKAGYPSAFVIESAMENTSKYIHTAQDTLNTVSFSHMLEHAKMTVGLAYELGFASAL
KZM24232.1	>ST47_g4627	MAGYLSILLTLFASVVSATPSGGSLQVCSAQLDGKLPSSTPSNFHFSGNVRRYYIAAEEVEWDYAPTGWDNWLGVPFNLSARAQYSGYTQYGTKWLKALYRGYTDASFSEIAPQPEFQGTQGPTIRAEVGDLIEILFVNRLKHHYATMHSMGLAYTKPYEGSDYPNNTMPGVNVTLPIANYGPPMLGPEDCIVYKWMVNNQAGPTGGLPAKIHSYHSYVSLQQDANAGLIGPTIIYASGKMNETMASYREFPILFNTYEEDQSFLSSANKARLQDGNSSAQYTMPQLHTTGLPSGNETVWEPQLTNFESGGQFSGAPTFFTINGYVFANTPTFEMCVDDNVIWGAYAYGSASHVFHLHGNGIDFQKYHQYAESINDGVGKTLYSQAVGEGQWQVICHVQ…
KZM24235.1	>ST47_g4622	MAAPKASGSRRLVLVFCTWKTLLFLLTAFCPGPGYDTSALILTDASTHRYANLESSSRLDHLVLNLFRWDALYFVKAAERGLMFEQQWAFSPAFSQLLSVTTRFVFGTSEGSLWYYITTGIIVSTVCHCFSVLVLYKLLTLLTGAGRQQSRVPFVASVLHIFTPASLFLSSPYAEALFSLLNLTGMLCYAESRAAANRASINTREVAHKLGSGLLFAMATAIRSNGLLSGLILLYDVARYLPQLFSMRIKVQDVCRVIVTCASGALIAIGFVGPQYLAYLDFCGTGNSTVRPWCKKSIPSIYSWVQSHYWNVGLFRYWTMSNLPLFLLALPMLWLLVYSSVTTLRSGYAQPLHGRPTVPHASDTLESKHAPLVTCELPELALPQLVLAFAAATSFHVQI…
KZM24241.1	>ST47_g4626	MASFLLNPTLVLGLLTARSLAAPASSSESSYLAKRATAALSCWDNASNGQIFIAKNAERETLCGKDYAASAPASFEEGISDCDTTQGYINISLVWPNSCYKKNKLTTDVDKASVWTARKKVTASTGGSSTDTENTDTKTATQDVTCQDKASDGVKYISKKGMFMVECGFDHYGGDMGSSNKDTFAACIEDCAATEGCIDVSYVWGTCYKKNTLNDGGAAGHVWSAKLVASGTDSAGNTPDTKTDEKTDTKTETPKATPITCPSSNGKTPSISSGGTYEITCGIDYWGGDFKSLETASFDSCLEACEKNDACQGVFYVASSCYLKNEVNKSGAAAHVWGAIVRKAAKDVFTFPTVVNKELEAGATESIMAENMTLPSPPLATLGLISPPIWFGGNADAMK…
KZM24247.1	>ST47_g4607	MARGLSKLYALVPLLAAGLAAAQFVPAPTDLTTKEGYAGVNVRYKQVPEGICELDPNVKSYSGYADVGKDQHVFWWFFEARNQDPSEAPLTVWINGGPGSSSMIGLFQELGPCGIGPDLKPFNNPYSWSNVSNMLFIDEPTTVGFSYTIPIPGYKDNNGLIIQLPNATCPEYAESYDSCGTYSKPDFALTANSTAGAAPNMWKTLQGFMGAFPEYSRKGFNFATESYGGHYAPIFNAYFLDQNKKNIPGAHKIDLENVLIGNGWFDPLVQYQAYYNFSVFPGNTYDYDPYNASVKAEWYNNLYGEGNCVDRIKQCYATGENAICESADSFCANKVETLYDIYSGRDEYDMRYLTPSPFPYSYFVNYLNTPEVQKAIGAYQNFSESSGTVSSAFGNTGDD…
KZM24258.1	>ST47_g4592	MKFFATIGAVLLPFIASTARGIEFDPEDEASIKAAARTYAYGLMELYKNNATGTPTQDIGIWPQPHYWWEGGASWGGLIEYTQFSGDNSHVETLQQALTANYGPNNDFILTYRKSQTGNDDQAFWALAVMSALEYQFPDADSAPADYLEVAVNAFNNIVGRWDTTTCDGGLKWQIYPENAYGYNYKNSISNGCAFALGARLARYTGNQTYADWAEKIYDWTKSVGLITDIYEVFDGTDDKTNCASVADKTQWTYNNAMFLHGSAFMYDVTNGASVWKERTSGFLKHAELLFFSAVKKDNIMYEWACETGESGRTCNLDQQSFKAYLSRFMAKTAAVAPFTKGTITKYLTASAVGAAKSCSGGDDKVTCGSKWYTGSWDGTSGVGQQLAALEVTHALLSL…
KZM24269.1	>ST47_g4615	MFRCLALVATCIGLHFLSPASSVSPHGSSLGIQQATLLQLLKWGLGAWAAVEFNAALNSWAENRWKWSVDKSDWNWPSELAVVTGGSAGIGACVVKKLVSHGIKVAVLDIGPLSSQFTDAERELIRYYRCDVTSRDSIQSAAQGIRSDLGSPSILINNAGIGNAYTILDIPTEALRNMFDINLISQWSTIQEFLPDMIAKKKGHIMSVASLASFVALAGAVDYSATKAALLALHEGLTQELKHRYKCPQIRTTIVHPGWTKSAITSHEAIKAGLKRVGASLLEPEDVADAMVKQIIAAKSGQIVLGPRISPKIRAFPIWLQEIVRDSQANVVSGSGSTATE
KZM24270.1	>ST47_g4614	MWFKIVLLSYCAASLAVTIVTASITNDATVPRRQHKVERTIFTSVERPQQSFKNVTSSSELIKSTSSLGVTSSALTPSLSQSTIFNTPSIVITPVTTSSSTPTSVKTDQSSLLERSSSDNGELSYSSTLLETESGRTFSASSTAGQQSSETSATSHFSSSQLATSKQATSSTKVGTTLSISSFTHDGPLFSSTLESSSNVPKSASNQTPTTSVQAPSSTLTSATPVEISQAPSHIITDPLSQSLTSSVAIKTQSSAVPISSSQNSASDTSSTIASASTRLTSQLIPTSSIPHEQQTNPLFTAPPASTSDRKPNPGTLKLTTSTTFDILTNLLPEPLSTSFSEHASGLTSLPALSSTGNLEASTSAPWSTIVAVTSIEESNDSVETTSTSMVPSSLVTSA…
KZM24272.1	>ST47_g4610	MFFLQFFILYCNLFVEEPAGSNSETASRKRRAGEAFDNGEDDSEDDGDNLIPAHDPDSEPLPDLPMYHPSVKEVERLSSQLISEFQYFIKNAAYQDEETEYLLEESKVLEHPPHESHVLRIALVGDAGQGKSSLLNSMLGQENLAIHAADGNSCTFVVVEYAQATATQKSPFQASVEFLSRQSYRDMVKEQLKNFWLHMAMDDEEVDEEIANERRLASGTCMTVFSSLFMGRTEFQDKDRAEDFLSHAESAEDPRLVGKLMSWTDHILDEFMPDGEDNDVATLDANTASQISDSIQPFTMAMDSPLFEGTDIICCPWPLVKKVRVSLNSRILDQGIIIADLPGTTDKIRSRVDSARRYLQLCDMTIVVNTMARAIDHAALHNHINESFKRKRSGNTIVV…
KZM24298.1	>ST47_g4576	MVRSLPFVLGCTAVASAHSWLGCTDQDNRQILEWMKGNATEYKGAGDLFVDTFAPGLAVFCKGWPRAKHNPGNWIDESSNYLWDIAAQSAKGDTHACHPSQRTSTYFTSENAGMATTTPGGSIKLMFGGNGHSRGANVDGGDPGTVAVYWKGGKEKEIEDIKELNEENRLKQIGFAEEAFVWPEDKNVKAPSEGMLDKGNWMTVEMPKDMEKGRHMFVWAWEYGGKPRWSTCFDVMIE
KZM24309.1	>ST47_g4559	MNFKNLLAIAFLALAPIEVAAESGYYNSCNSVQIYRGEDNNYSIFANCRQTSGLYSVGEAIHLNNCFTNSWGHLLPQVRGMFSPSCRNMKLNGSMMYGQCNNGNGGWQDTHIDTNVFIGNINGELWCHGKLNGWRK
KZM24312.1	>ST47_g4528	MKTATSIFSLALAAATNAQFYNETSRPFNLVLTSDNTTINGQTLSACHTGAALESLCVSGIGSVSKPNPIAPTTFNFNTSTDPFTPNATLGTPGILTWTLPTSSVGVPSSVYFNYDPTTDIALPILTPGSERPQSLAFDEQGRLNVQGYIDWTASPPNATGTTVGYYRWYACQTYFSGYSYENLVWGLGAGKPENPTCVSVGVKRVFV
KZM24317.1	>ST47_g4525	MVKSTSIILSLAASAVAAPTCTWSSWKNVKNLFVFGDSYTQTGFDVNGTQPNAANPFGNPAYPGYTSSNGPNWVGFLTTTYNASFVKTYNMAYGGATVDSALVTPYAPTVLSLKDQVQTEFLPRYGSHPKDTPWAAKDSLFAFFIGINDVGNSWWLNNATLYDTIFTRYTGLLDQVYKTGARNFLFLSVPPIQLAPLTLSKNDSGYSVETEGKVIADWNKRLSAMTTAFKKTHTDANLFMHDTYKVFNDVITNPKAYPQTAGLKNVTSYCAAYANGTPTWYTKDPSCQYAVNEYLWLNELHPTFPVHNATAASVVKFLGTQKCTK
KZM24324.1	>ST47_g4506	MNISRVLCAILAPTLVSAAAFAIPEPTQPVAPAADNWSPAPTAAPQLGFHLFGREAQHASQDNTCGYVSGLSASSITCPNSKAICATNTFFGVHGCCDPSALSSCTIATTCIPSTAMSSLCTDDACSSNNAIAKCTAPASPACYRWLFAYESTTMTQHGCAASGFTSTAQRSYGPSSTSTPSPLVVTVTASATPSASPSADNEPKQSLGPIIGGTVGGCIIVSLVALAALFIHRRRRRAANHSRPPPSRPHHNSPEFHPGGFPAAAWNEQDFKTWQRPDMPCLGVSEVHGEDRAVEVEAPEKSKVGVWHASCPAAAVEVEALGREKGWRPWQGIVEAPS
KZM24336.1	>ST47_g4537	MQFSLATITALLSLTSAAAITARSPTTGRLVSRQASVCGALATPVCCQLDILGVANLNCENAGPVETTEDFTALCAETGTSAQCCALPLGTDSLLCTAA
KZM24355.1	>ST47_g4501	MLSKTSLALVVLQATLALAGNAIINNRCNYDIWVQSVHAPYGGNMTHVPAQSQYSEPFSHAPTSVKISKTPSIVSGEQTQFEYNIVSNQMWYDISLVDCAKGPQGASGSFDTSSCPGYNEGLAMHVTDSICRKIDCGAEAYCPTQAYFVPQPYKELGIEEPVFVCPGNGTSFDLCMTVCSREPQLRSRGIAGSLDNALVVDEEEK
KZM24357.1	>ST47_g4488	MLASFVHVLLAFLSTISLASSSSSSEQEQFKDVEWDDDNWIISTRALDQGHYQSRLTLANGYFGINVASVGPFFEVDKLVAGDVISGWPLFSKRQTFSTIAGFWNSQPRTYGTNYPWLYQYGWESFVAGIPHWSGLQIEANGEMLNASVNPEHVADFVSSLDVKAGIARWRYYWKPGGSEKDAIDVDFEMFVHKLHVNKAAVRLRLTATHDVNVTVYDVLDGDCAVRSEFVDKRFEEDSPTIWSAVRPGTIDDVTAYVYSTLSGSDWINFETRKQVEGGIFNEGNGSTIAQSVKVLLTAWRPTELNKFVGIASTDAFSDPQAIAEDASKSGAKEGYYSLLHSHIEEWESILNPDSVDNYYLQNGSLPEDANIQELHILARTNPFYLLSNMVGPNAVATA…
KZM24360.1	>ST47_g4490	MYIPLLLFVGLATAIPAPAAASAAGYRFLGRVNPASKELTWPGTGISFTFKGTSATINLANIVGDNSFDLIVDGKAPTEIAKVVNATVSISNLAKGTHTVVLRRRSETALGTVSISTVTTDGSFVAEKAPSRQIEIIGDSITVGYGLDGTNPCTNNAAVTDNPKTYGVLAANALRADYQVIAWSGKGLVRNIASTTPDTSPVIPELYTRYGANDASGSYPFPSSWEPSAVVINLGTNDWSYLGYNAQGQSYAAREVLSPSVFTTALVKFVKQIQSHHPAAQFFLLNSPMLSDSFPTAADAQKTNQTKALQDAIKQLGVKAHFVDWPSQGSDVGCDYHPNAATHATEGKVLAAAIQAVLKW
KZM24382.1	>ST47_g4475	MSPSNVLLLSAGLLAQLASAYTQVNVASPFMYKNVDPIVFPGSYDKSHLHSFFGSDAVTANTNTSAELQAGCTNAQNPNDFSVYWIPTPLYTADGSTYEPIPVMRFSAYYNLGETPAEVAIPQNVKMVAGDATATSASAMPADAKATWFCEGDDASALDSNGFPSKACSTHLQQLLYFPQCVNEQTLETAYKSKSHGTANYCPTGMKSMPQLRFSVRYDLRKVLPNGWSGTFPGKLACGAAWCSHGDFINGWTEDAATNMVATTSEKQHFAAVDGKLGKNGARPTCKSADAEPSKGTSDYAESVKQMSKREVPALGWVSRTRFARYL
KZM24384.1	>ST47_g4473	MLRLNFAVLAAALFNVSHAQNQTDTESTVQFLLPGYCCTVLTLSAVSKRVTYPGQDAYESSLDSYFDGKSRLTPSCIVQPKTAEEVSTTVKVLTTANLLKPCQFAIRSGGHTPIPGSNNVEDGVTIDLLHMNSTTYNASTKIASILPAARWGSVYEALEPLGRMVAGGRGSTVGVGGFLLGGGISHYAPRVGLSCDNVINFQIVLADGRIVNSNKNTNADLFTALKGGSSNFGIVTRYDMETFPSENLWGGIVTYPASTADQHFKALINFGLNPERDPNAALIVFQGYSTASPTDVVRAAFDYTKPVARPDAYKEFFAVANNLSDTTKIQPMSAIAAEFGSDTTKRVQFRTLSFKIDLATLQETARLYKIMLTELQAKASGQWRVSCLHQVWSTSYTAN…
KZM24388.1	>ST47_g4468	MALKYALAALAFGAAFVNGQSTEDSVYTVSDDYYNYGRTSRYSSKTSLFWTATVKYQDWVSTSTYTRLSGQTTTYLDTYTRTIKPTVMPTATPTYTSTYSSRYEDVLVVELYYPENAVAESDFVPTSTWESYVSSTASASVTYSTTAYFMPVTMTAPSSCPTIFTVATQASITYIPTVVADQLQPTSTDVSTSTFRSYVAEYSSWYLTAGAAPFTSTDDYYYSYYIASCTPPPAQYTSGTGSSGGGGSSSGSDGDDSWTDYRTCYFGGCTSLKTWIIIIATVLPGIFLLGFLESWFWYTRLMKGKSALRCGTVCWVLLSLWVLCFTRMQDARSKEDQKLLQQKWKEMPAGQKFKNWSWGFKRRYPVLLLGQYSKQTVGIVPEGQPLHPAMVQAAPGQVF…
KZM24389.1	>ST47_g4460	MKYSYAFALAAAQLASAHTTFQSFVIDGKDQGQHFAVRTPSNGNNPIKDVTSTAMICNGGTKADDTLEVAAGSDITFQWHHNDPATGSGDADEPIAASHKGPVMVYIAPAESDGEGAVWTKLYEDGLSGGKWGVDNFIANKGQITITLPDLAAGEYLIRPEMIGLHEGNREGGAQFYNGCGQIKVTGSGSASLPAEGVDMTKAYSASDPGVLFDMYSGATTYEVPGPKVWDGASGSGSGSTPSKTAAASSTAATSATATSAAAPATSAAATSAAAEATPVPSEAATSAAATSAAPAPSATQGSGSGSGSSTLPEEFTIQEFIAWLKETTGATGASKARRHARSFFG
KZM24401.1	>ST47_g4457	MVFGLISLAATVPMVATSVLSLQSQAENTKSHGIDAEWKTDKSHMKCRPSARTPEDRKELFKDSIVVLREGKLYVQLPSYHGEALHPFSGYYLPYPDSNFEGLVSTISDEPPQLNWIHLDTSSKIYQIRYGLRAAAEQGLTGPWGARVCCDGEIRFLMENWEGFIAVETEEPGLCSSCFDRYDDGLKGKLARDQRTVEVELIRIAIEK
KZM24405.1	>ST47_g4424	MYALSLTVLASTWLVAAQNDDVYHPHGAFAFIRSGEHTPVLTGDTQVLTAVGANQMYQLGQNLRARWIDSSGNAELGRQNIANMSVDMINNDQISIQTLDTQYLVSSAQALMQGMYPPRALSNSTGLGDATGLLADGTIVQAPLDGYQYATVQSFSPFAYNSIYIAGNQNCPMAKLQSLQYLVTDSFGNTKASSKETYDKLQTSWFQGNLLDDQRDYDHALDIYDYLSYQYTHNRTIYEGLTGSPMYTGVYNATRYYADEYAWNFWGNTASSGNNTDNQATGGKTLAAEILHQFQDLVAYSRNHSATTDAASLITLLFGEKDSFISLLSLMLMDVRDKSFRAIPPFGSAMIFELFSIGQNDTFPQDDDDLWVRFYYHNGTTDFNGQLIAFPMFNHGPSQ…
KZM24441.1	>ST47_g4437	MRVQILSLIAVASAVTAQSPAAVPAPVVGGNPKGASYVATLPEQEKYTVRGSVAAVSAEDGNGVKFTVSISGLPAEGGPFMYHLHEKPVPSDGNCTGTGAHLDPYKRGEQPICDASKPETCQTGDLSGKFGNMTAQEWSQEYVDLYSATRPDINSYFGNLSVVVHLSNKTRIACANFTQLSPGEESSYPVSSIILSTTVSSGYAQPTESGHYNSSVPNTPTGISAPTTGVPIAPSSSPSSSPEFTGAASKLPSTAAGAMIVLVAALLL
KZM24457.1	>ST47_g4384	MRFSIGATAALAAAVVRAEEPAADSSSSSTSVAKPTFTPTALKAPFLEQFTDDWESRWKPSHAKKDVKAEDEEWAYVGTWSVEEPTVLKGVEGDKGLVVKDKAAHHAISAKFPKAVDNKDNTLVVQYEVKLQNGLECGGAYLKLLQDNAALHADEFSNASPYVIMFGPDKCGATNKVHFIFKHKNPKTGEYEEKHLKNPPMARIVKTSTLYTLIVKPDQSFEIKIDGESTRNGTLLEDFTPAVNPEAEIDDAEDKKPEDWVDEARIADPKATKPEDWDEDAPFEIVDETAEKPEDWLEDEPTTIPDPEAQKPEDWDDEEDGDWVAPTVPNPKCDEISGCGKWEAPMIKNPAYKGKWTAPFIDNPLYKGVWAPRKIANPNYYEDKTPANFEPIGAVGIEL…
KZM24477.1	>ST47_g4377	MLLTALLGAAFATATTLAQPTNGTNTTYVGPENGNLVIVGGNLQSDSIWQRIITLAGGVDAPIVVIPTAGGEPTYDANFSSAVSFRRLGAKKVTVLHTYDPAEADTYEFIAPLLEAKGVFYGGGRQWRLVDAYAGTKTETAIQAVLDRGGVVSGSSAGASIMGSFLARGDTANNQVMIGDHTVGFGYLKNTAIDQHFLVRNRQFDLFDILKVYPELLGIAIDEDTALIVNKNDAEVFGSTYAAFYDGGFWSREGSDLKNIPPPESRFYFLKAGDKYDLGARKVVDAEIIAERSEL
KZM24486.1	>ST47_g4399	MSIKSTLFLSLAALSAMTEAAPTKRASAGKRGLAFPKQNNGVAGSTYTQLFKNYDQITWMYDWEAVIDGTPISGLEYVPLLHSNQDWCTAGWATNVANAQKNYKVSHVLSFNEPDQCGGGGSCMSVSDAVTAHKKFIQPLAGSLKIGSPAVTNGDGADKGINWLKSFMSGCSDCKIDFVTAHWYAWDKAEDFKTYMTNFHKTFNKPVWITEFGVTEGDAPAFLKEILPWMDQQSWIERYAWHMAAPTTNEGGLKFLLNESGNALNEVGTAFAS
KZM24488.1	>ST47_g4397	MVRLSTYLAATAALALNAQAESMYSKKSGVVNLSGTDYDRVIAKSNYTSIVEFYAPWCGHCKNLKPAYEKAAQSLAGIAKVAAVNCDEEMNKPFCGQMGVQGFPTLKIVRPGKKPGKPTVEDYQGPRSAKGIVDAVKDKVPNIVKRVQDKNLDAWLQENKETAKAILFSDKGIVSATLRALAIDFAGVVSLAQIKKTEKAAVDKYGITDFPSLILLPPGSDEPIKHEGKLEKDAMVKFLSQVAPPNPDCPGPKEKKPKKDSKKESKSSSKFAKASASHKSADSSSAAASATEETVQEPIAVTESPDPNVKDEDTPEPVVLPVEDAKPAVPSIADAAELQSLCLNDRAKTCILAILPPDDASDAAMSAMSVIATLSAIHKKHGSKLFPFVSVPPSNPLAD…
KZM24498.1	>ST47_g4361	MRLSLALPAFLATSHVAAVPQLRAKSQQVLTTPPKHIGVGHFSEWSRATKKSFLMDWQAGKSSEWIMVMGNEGGDLDSMTAAITWAYHLDHSTENDTHPVKAIALLQTPSHALDLRPENKLALDNSQMTVGHEDLLTSDEVPEDPETLASKLKGIILVDHGEPLRKWRGAKILSIFDHHKDRGTAPEASPRIFEKVASCTTIVARQLLNELEKLPQEYHLNHEFLELILSAIAIDSGGLTSDKTTDADIEVSKRILARSNWAGDKLSKVMEELDDELSSAQKDISHLNLRDLLRRDWKGDLIDTPSPRTPTVSLGFASIPYSMDEQIKKTDFAELFDWFAVHAAWTAEAGVDISICLNKYKIKDKKTGQKEKIREVVLTVRDDVRVDQQQADALFNLVK…
KZM24517.1	>ST47_g4329	MKAITLIAAACATAVIAEPEQIKPRALYTIETAPGRTVQITEEERWELSSSGGCGSHFFDITEFNAEVKAVKVPAPYPSKFKYEENIRRLFPKLKWDNIKSNLEKYAIYHTRFSETVTGTQASEWLLSQVQDVVLKSKKQGVTAKAFPHALWPQKSIVVTVPGRSNRTVVVGAHLDSVNGANRLEARAPGVDDNASGSFLLLESLRVLLSDKDFGPSKLQNSIEFHWYAAEEGGLRGSQDIFTQYSNAGKDVWAMLNQDMVGYTKGTINAGKPESFGLITDFTDPNLNEYVGRIIDEYTDIERVNSVCGYACSDHGSATRNGYPASFIFEAAFEYRNPYIHTANDTIEHIDPKHVLQHGQLVLGFLYELGFSKSQ
KZM24533.1	>ST47_g4237	MLCSTLIAASLATLAVAAPTDMKSAKQVVDTSYGTYKDYGNYGKYGTYPGSVEKAAQAMGKARPRFSPLRDLSGLITSAANSNVKKRGVLKSDVESAADADYGSYGKYETYSNYQTYPGGVEKAGARMETAAAQ
KZM24537.1	>ST47_g4217	MHGLTSILAFLLLAFITQANFTGIGNIYVLKSENWGTASPTKDKIGCLNDSGKLVATTDEAACGIFTRLNDFPYTLSTKKGNCTFTDESQERNTDSMYGGSDHAWNCNATILSDIYDGLYTIDGFPYVFLCFGDVACYYDAKKAPERNEKLSVWQYHWGSQQLGITPGHIQLVLMWNKTGGSPKRAKVADIPSPRVRLTDGLQIPLLGQQRRLG
KZM24567.1	>ST47_g4263	MRFTVQFRAVYAILVFFLTACTLALANPEIHATLSLDKLSQDDHSSQKPIAVLDAGLPNAFPAHQPMQAASDAVSAERPIGKMVVAVVVSGVLFGLGMGI
KZM24578.1	>ST47_g4294	MFGSRKFYVSLFGALAWSSTAADTALSIVEVASISTTQASLLHIAAAASALDVVSLCCIGFYVVQYARRRDSFMERSIQARKALVGVSVVLSATALAVSLALIISIRSKWNEVLSTSSSGPISNWEGLFAGHVIVWAISCFNQIVLYSSVFWKRHTPELQPITVSGPRDSVMSEMRSATPNRNLFTMEPAHPSSPTFSSRSSQSLRSFRESVRHAVRPVTSRTTLISRPSFNRDTRSIYSDAHSIDNVSHSDGFDSWDTSSVGLQARDAVMQTAPSKGTPLEPIPGSRSVTPARALDGPFLPEIDEELSEEDLVAPRMIPDISRPPSPAVSEAHIHPLFRTESPIPPPEATPGTSIVASPLADQLITCPARPYQRMRSNSNLRNNTTSPSPLTSAQSLR…
KZM24586.1	>ST47_g4311	MRTSFPVLASLASVTSAARFLLQVPTTHVVNPSALSSTTHATLQSSGPPLDAYLTRSNTFNFNNVSAGSYLATVHCRDYAFEPLRIDVSVEESVEGSGQKKEVIRAWQTFLGNEWDNKGESRGEGGNGLVIEARPVGQKEFYQERAGFSPLSFLKNPMILMAVFSGLLMFGMPKLMENMDPEMKAEMEEMQKNGVLGSGTTNTAQQIQNFDLASWMAGKTTDSGANSRGQSPAPEKQQTSKKR
KZM24600.1	>ST47_g4343	MTSLRRVFATAALCVLGGQTVLAAPLSSAHDLAVDLGYGVYQGAHNSTTQLNVWKGIRYAAPPTADLRWQAPAAPAVSQNGTVNATVFAPGCHQAKPSPFLSAPSPSGSEDCLFLNVYAPDYEEGKNLPVLVWIHGGGYGAGNGRQDMSEIINANSNSFVAVSIQYRLGAFGFLSSAEVEQNGVVNAGILDMAFALRWVQDHIGQFGGDASRVTISGESAGAGGVMLLGIAQNGTLGTSLFSGIVAASPYLPPQYNFDASIPTQKYQSFASRAGCANSTETLACLRSKDSTTLQAANSAENSANFYGNWAFLPVTEPETGFISTLPSASLAAQRVNGQHVLVGNNANEGALFVPPTINSTAALQTWLQDAYPSLSATDLEQILTAYPASNATSTSKHAT…
KZM24603.1	>ST47_g4228	MRFATLSVLTALFAATTMAVAPQRSVIISFPNETPDHIVEEAKEGIRKAKGVITHEYNIIKGFAAHAPASALEFVTAMGEQYKVEIEEDGIVTTQGEE
KZM24605.1	>ST47_g4222	MPRNSRHGSLWTGLTCLLTLQSQLPVASAQVAEIEKASNDSLLWGPYRPNLYFGVRPRIPKSLMGGLLWTRVEDYQTVQNTFRHTCEQHELDGYGWDEYDVRSGGRQTIHDPANRIDITTEFVKFPGGEHGGSWGARIKGTPREDASPDLTTTVIWYNTLEGLGSLEVEDPNRDETGIPGDVVFKGQTAELGDFELRVTEGKGAHPHFDHPSYDEKPLDRTLVHSGQVPDDALWQIKAVLFAHMKSQIDELVPKYGQENPPPPAQVYTIQHQPGAGNIHMVQKVFDGAFEFDIIFSSGSAPAKITADDMTEQIKSVTSGFATRFTDIFKPQAPFLKERYTEFSKSLFSNLIGGIGYFYGDSRVDRSYDEAYEEDNEGFWEDAAEARGRNEAQSVGPNEL…
KZM24616.1	>ST47_g4248	MLSKLLLLSLLASSVAAAGVTGTPFGFAAATTGGGDTEPVYPTTTEELTNYLTDDEARVIVLNKEFNFIGTEGEKTEDGCRPDSNKCPGDGGQDAINGADWCTKSDYPSVSVTYDLAALTPINVGSNKSIVGEGTKGVIRGKGIRFANGAQNVIVQNILFTELNPQYIWGGDAITLAGTDLIWIDHVKTSLIGRQHIVAGYDPSNRVTISNTEIDGSTSWSASCDNHHYWALLLIGSDDKITFANNYIHHTSGRSPKVGGTDKGTLLHAYNNYWYDNTGHAFSVAPEENGRVLAEGNVFESVTKPIEDGVDFLYAATDDGAACSSPLGRTCQANQLTSSGDWSGSATDFLSGFADEGVEAKAASEVAASVKSNAGVGKL
KZM24618.1	>ST47_g4240	MRSTTVGSTLLLLAGAVAAQQSESIVTDIPSSLIQTTEQVFTIQTSVPTGSTTPSGDPTVSLPVESLPIPSSISDGDVTLTLPVESLPPVGSEPTPSITGILTNPHLPTISQTTDPLMSIPQGETPESTGAPATSSASGNATASASRSAPAEQSTAAAPPSLKGENTPFMLALGISGTMASSNPNSSASHANISTPVPFPQPGGLHNSSSPTPTGTTAEKQRARTSTNASSASSRIRSASIKLMNADPPPGMWAATGGVASKAPSLVDIRRGSFGSEGWDEQRQREHRRGSQESNERPANNRKGSSGRLGLEPFPALTEERSSFETREYASNYCAQNDAKDAGAGIIEPTTSHLTDKTKETAMRQPMGTSLQYANGYIPPPKLPWTRSFTIGLKGFWKW…
KZM24622.1	>ST47_g4244	MKLIALTIAALSAVTAAQGYYDLQSPGFRLIIKSSNSTLNGTALGACHQGAAIEGLCPTGETVQDPPSSYTTFYHNISSNDHREPGAADVDGILSWILRAGGNLTVPSAMTMTPLPGSNVVNPTFYPGISEHTSIAFEEDGCTYISSFLDDTVSPPSYYNPTRKVKNWYICLTRWSYLYQTLSWKIGVTDQPQNPSCQKVDVIRVFN
KZM24626.1	>ST47_g4218	MYATAVFLRITYLLLLASVVLAFPHDRMVNNEFIRDVGVLFSQSNFTGNVMLLVTHKQEHKCETVDLFILGGSLGSVQICVPVTCIFYKTNDCTMSEDSNDYYFQGPVDIDNLQVLPDFACGSYECGSIEFMASVVGKATGALTDTEGGHYGPVVRN
KZM24632.1	>ST47_g4281	MKVNNLTFSIIGFASLATAQNGNDPLILNNRTGLAPVVYDTFSTSYTKLPVNETAGNGLSQVLPVTAPVTQSPVYANTFFPKPTTSVPCWRDGYPCGQDGGKRIQRRIADFVRATPAPTIEDVPARTGEVSIDIPRFVDMAVALRVPPPEFFNSRPDIPVPGETGDATMNILPIPTELIDGTQYDAPPEPTSTGTAVTDIPSETSEAIFFILPISTLPPSTTARPSHWRGPVPSYTIDCNRHYCPTNTRSVSTTSSTPLPTTHPVIPPTEPYTTQRPAVPPQVTTPTINTRNAGVPIDWWRGPGQPIVPDHHMEAIAPRSSDCELHYCPSGTSTLASAVPGAATSKTTLSTVVASTGPGHASFPAVVPGVATGG
KZM24637.1	>ST47_g4349	MKTFVVRSLLASLAAGLVAASSGAVSYAGYQVLRVNTLGHLAEVQKKLSTISYQQWEDTDTHVDIVVSADQFEKLQSLGLKYRTLHKDLGDSIEKEGQRKAYRKRDIEDLSWYDAYSPYAEHLQYIADLQAAFPNNSKLVSSGRSYENRTIQGIHLYGDAGPGKPAVLYHGNVHAREWITSKTVEYLTLQLINAHKNATNTTQSVLNQYDFHIFPIVNPDGFVYSQEKDRLWRKTRTPPPPGQNQTCYGTDINRNWEYGWDANSLGASTNACAQAYRGEKPSDTIENQGLDAYARKLRDTVGIKLYIDWHSYGQYILSPFGSKEEWYAPELGKWTKTASVLSETIRDSSDRRTTFTFGPSGATLYTTTGAAPDHLYAIGGADFSYTIELPDTGDYGFVL…
KZM24638.1	>ST47_g4348	MKLTLLAPLALAGLVSTSPTALLEKRAVTCLKVGATATATWKNSAGKTCSWTGTVGSNFGTNSVTGGDYSCNGRCGAGCSGTALGNAYTQDCFSHDVCSWFNNASGGASDANCGAAYDAAVDDTLLGVVNGCGQSNPTNAASRPSTSPTCS
KZM24653.1	>ST47_g4162	MMHILAATLLVAVSQAVASQSCAGFSPNPIPISQLANHFPPQKVANVEALLETEAIRQTLSLYAYVIDARDFDSLSDVFTTDAIANYSAPLGVLNGIESITTTLSASLAQFPGTQHLLGSQTIRLCNKTEAISATYLRAAHFLQRNVTGGVLDVADYSSMLYAYGQYQDSWVKRDGLWKIKYRNLVYMGPLITHLNKIRREIASESLQLRLVVDGLEAMGVQDIMNPNVFNKQVWDTGLKAPTIYQEFPQKFCKLCFAASGSSKLHYVISAVALATNIFKSIPSEKREIYPGVLAGREPDSCCMSKVSYAGFTGFADKVLDCDS
KZM24665.1	>ST47_g4140	MKLSNIVFAAVGALLPASTSAIELNPDDPASIKSATKIVAAGLRDWYTGDRVGDTPGNLPDPYYWWLCGAMFNSFIDYWYYTGDDTYNAITTQALVHQIGQPMAFMPPNQTSTLGNDDQAFWGMAAMSAAENKLPDVKDEMSWLSLAIAVFNTQVPRWNAKTCGGGLNWQIFVFNNGFDYKNTISNGAFFNIAARLAKYTGNSTYAEWATKTWEWERSVGLMSHDYHFYDGTSERQNCTELNHVQWTYNAAIHMSGVAAMWNLSETTNDATQAAFWRGHLSGIINSTDVFFSPEGAPDVMIEVACERNGLCDHDQRSFKAYLARWMGFTMLTAPWTRELIMPRMRASAVAAAKQCSSGKGGCGLRWWKNGVNDGEVGVGEQMSALEVMQNLLIDHVSGP…
KZM24667.1	>ST47_g4146	MALFIWILRIATIYPPGALGVALDSFTSTHYVNTSVFNPLPPKNWNPLLTTSTYNPGLCVELLIAYDLEPSEAPYQKEFAIAKDACHGEDVYPCFAPKVALVNTARTVLAAGQITSFPPSTGLNSTYRLNFRAPQMQCNTSEAIDDTFQLVSNSSDGRPAIFGLVYNSSQTLGRSREMTATKRDILSFSTRYPYKVTSSITAVARTYETRCQPFSMKYDLNISYVNGLQDIKFSTSDPIRYEDLTANSTEESYKYYGAHDSLPWSVDSRDISIYPQDLQIWIEDFQWYKRFSRSLEDNRTCIESQFTPDAPTAVNCTWVWEEYSGVGLTTSSSKWSDALNYEYHVLTLAIAAGEESLKTSVFDINRFNTTMEDDFTYDPTLTVDITEAKLNAILSNITI…
KZM24684.1	>ST47_g4176	MSSRSALSSIIRVGLLLLCYANTAHIPIRGVPSSNISVKLKTGTLEGVFSEAYDQDFFLGVPYAKPPVGDLRFRRPQRADAWEGVRAAHEYGSWCYGVSIRLAGFSQNNTGPMSEDCLTLNIVRPAHTPGKAKLPVAVWIHGGGYSEGGSADQRYNGSFLVQESVQMGNGIIFVSFNYRLGIFGLMAGPVLEQTGDTNIAIHDQRMALTWIQENISKFGGDPDHVTIFGESAGAASVGFHLIAHGGRDSGLFHAAIAHSGGPYSYNAFTNATQRRQEFQNTLGHANCTAATDALACLRSVPAAALNGLNSFVTPYPILDGDLVEDYSSKLLAKGAFRKVPLLIGTNRNEGSAFLRLFRPTGVTTETDFFSFIQEHNPGQTLPQAMLRSWSDEYKDEIFD…
KZM24686.1	>ST47_g4174	MQLTVSYLARIAVTVASVHGALTPVTDFGTNPTNLQMNINVPAKLAPKPAIILALHGCFGTGEAYAAETTYNTLSEQKGFITIFPSSKRDSNCWEVNTAKGLSRNAGGDNQGLVSMVNYTIAKYSADPAKVFVTGSSSGCMMTNVLMATYPDVFAAATCYSGVAAGCVAGSPGASPISSDPTCANGLNIKTQAEWVRIAKAMYPRYTGKYPKLATWHGTNDTLVKLPNLGEQLKQWSGVQGVKFARNVTNTPETGYTKIVYGDGTKLVGYEAKGVGHTVTASIVGKAKGEEAGPTSSLVKVSYQRLEPPQPQLHQNRIQQTPTSDDRFNSLIFNLNQQLLQEEPLQKQLIRQKEERQTQRQRQQQQTERLAQDRQREAAYVALTSSVFLSCEEGVWYEF…
KZM24694.1	>ST47_g4150	MAPSRSHTSLLSLLAATSLLPLQAWASFECKDMATQGVHFNFEKLGGPRVVHWKEEDLEHDFEYRYNFTLDLCSALKSDCHNGARVCAMRENIDLSQEGNSTVTPIDIAGTYTSYNGRDIQAKFELLRNSKSNSDAGREGLRTVLHGGRLPFDDKKTGTDQRAIIEFVCDKERTGLEGNDTDGGKSGNDKEGDKKDDKKDDKKDDKKDDKKEDNKGDKKEEEKQISGRDEGSKDQCEDSDASLRFCGYKVENLEKDKKARTLRLEWRTKYACEDAPVERPASSHWGFFGWFFIIVFLSIAAYLIFGSWLNYNRYGARGWDLVPHSDAIRDVPYIAKDFGRKIFQTVQGSGTRGGYAAV
KZM24704.1	>ST47_g4135	MYASLVVGLFLSTVVGAHPTAHDNSLVARAIDLNAFRLKPTSKYVNASVAESPSVRLRRREDYVETATELVKSIANGATFRVVGDHYVGANGIAHVNFKQTAHDLDIDNADFNVNVGKDGSIFSYGNSFFTGKIPDSPLTKREFSDPVDALKAATNILQLPVKADQASAETAEGKETFTLKGTSGAVKDPEAKLMYLVKADGSLALTWRVETDIMSNWLLTYVDAASNTEVHGVIDYSADAVYQVYPWGLNDPTEGSRVLISDPWDTKASEFTWQGTGTTTYKVTRGNNAIAQNNPSGGNNYLNNLRPSSPTSNFSYPYTSSMTPPSTYVNASITQLFYTVNTYHDLLYTLGFTEQAGNFEVNNNGQGGAGNDFAILNAQDGSGTNNANFATPPDGQPG…
KZM24707.1	>ST47_g4206	MKFSTLFSVASTAALALAAPTTPASALSKRADYCGQWDNQVKGSYTIYNNLWGRDAATSGSQCTGVDGFSGNTVKWHTKWSWAGGDGHVKSYANVVTKTSQKALYNIGSLPSTWSWTYTGSNVVANVAYDLFTGTTATGTKEYEIMIWLSALGGAGPISSTGSAIATVTIAGKQFKLWKGPNAQMTVFSFVAVKPINSFNGDLNEFLVYLRGNQGLPRSQILQSVGAGTEPFTGSNAVFTTTAYTMSEK
KZM24715.1	>ST47_g4186	MVRSVLGVLVLATFTNPTIAACVPDVPERVLNDPQILNHAAIIEAFDEVEKALRKPFDANTTRDGLSFALVHASSSTPVYTFNAGTLKFNETSFYPQDTAENAITGDSIFRANSISKNVAITSALILSRLTNRTITLNTPVRHLLPSFHLLLPDWEDGGRDITLAMLASHTSGITRDSFSTGFNQVLSTGKVTTDSIGALWANQTVDSVVEEVGRTGLMFKPGERAAYSNAGVGILGAAVASYYNEITREDLSWSQLAEQEILEALNMTNSFFGSIPDSLIPSITVPGGENWADLVLGEGYNPVAGMWSSANDLSKYIHNVWLQQPPSLISPFDRRHALKPVYSLPDGKQQVGTGWEIMLHTVPTSSNTSDPDITKTYGIYGKSGSGGGWRSWMDVVPN…
KZM24720.1	>ST47_g4181	MRQPYLFKAICFLPTLILAQCPEYVEYAKEIHEPLSAGKYQLAYQRPSEGCRTFKSQGLEDTVTRLQTVIKDPDLYRLFQNAYPNTLDTAIRWKGVAADNAEEELTFIITGDINAMWLRDSSNQMQSYLPLLDASSDPNSIASLYRGVINLQARYLLTSPYCNSFQPPVESGIDVALNDAASEDTVFPTYSNQSVFECKYELDSLGAFLQISTDYYKATGDYEFFGKFQWISAVEAVLKVAHDMKLPTYGPEGEVLESPYTFTRQTTRATETFANDGIGNPVANGTGLIRSGFRPSDDSTIFQLFVPANMMFSASLASASEIMGKLDTGNSASLAQQMSALSDSIRNAIETYGTVNHPTHGKVYAFEVDGFGSNAIMDDANIPSLLSAPFLGYRIDAET…
KZM24730.1	>ST47_g4123	MEPHPLPIIRACCMLLTPLSVQAHCYVSLIYRQPPKYIPPLLNLVEDTVRAPFDLQKYVREGGLTLVGGNLMREGLGTTLCALVPGCTATGEGYNGPKDGTALPDIREYIGV
KZM24732.1	>ST47_g4107	MRSSIALLVLGLAGAAVALESSYTGPLFNPSEAPYFAYSSLVIPIQTTLPAIQPTDAFSAATTISGIILPSTLSRSSAGLSSASRASSSSSSSSHPTPTSSSASRSASSAVSSAAVSASASAPAQQSSAAAVANRAGVVGVVVGGLLAGLALA
KZM24747.1	>ST47_g4133	MKPQWLHSTGLLLLSALTAVTAIDVTLTRDDAQKCSGMYSKKSWGGKVDPFILIKFLKKGDQNQEIEDPTVGVVVWEWKDSLLLGKPSVMPVDDRSYICNDDAIDAKLCNGTHKGEWILADDAESASNMYIRTAAVHLNDPKPINYPVASGERKLAIKTGYYCVATAAYTKDVEYEAIVTFRNAYGELPAAQIAKLPFYGGITIVYFVVLLFWGFLYYQNRHDILAVQNYITAILVFLVVEMLMTWGFYDYQNRHGNNIGTKVLMVVVAVLNAFRNSFSFFLLLIVCMGYGVVKPSLGKTMTIVRWLAVAHFVFGVIYAVASLTVRPDDAGPLVLLVILPLSATLTAFYIWTLNSLNLTMKDLMERKQHVKATMYKRLWWCILTSIVVIFGFFFINSFT…
KZM24748.1	>ST47_g4130	MPLSHFIRLCIISASLITAVPHNVVPTVTSVPASLPSQLQQNVPSCAHSCIRSSLSERFPIACTAQDDIGCLCSRYSTIGESLGEVALGCVYAACGKIDAAASAYNVCLGQRNAVLPTKTALTVVPSNGPSTTSRYSTSSTTSTSKGIYPSITRTTLETKTSASQPVFVDSISLPASATSTSISTPTSIVAPATNDDRPKMTPAQIAGLSVAAVSAFIIAIGLMALSVFLRRRKEAKSIYVHGKDQDHRRRQSAHFSHYVPVNDVSEASTQLPILPPPAASRDGPRYPRLVTPSPFSTLGISAAGSGRTVVRPGVGTAISAASVPMSQIGLAISAELEGCPAPAKSSNHPRQKITAEHFRPVSTRTENTVFEEDEIAARHRSSKLLPTPPVPIVPIRSL…
KZM24763.1	>ST47_g4091	MLGLTPALGALLLALLQNEATAIPTWPASTDELEDLLYVNSGYRARGFAAPVIPCSKGSGADRNSAAEWIRTAFHDMASASISSGSGGVDASILYELASLEHAGAAFRNTLERYAPYFSSRTSLADLIAAGVYSATRSCGGPAVPVRGGRKDATAAGPSAQVPDAANAIGIFRNQFNRMGFAGVNNTEMIQLVACGHTLGGVHAAEQPNIIDAGQFPNDYATFDTSVASFDGKNVVEFVSGNTKNPMVVGKAYRADNRGRDSDRRIYNSDGNITVKAMQDPQKFNSMCKTIFQKMIDTVPKDVSLTEAITPYDVKPYDVQLTLLDGGTSLGFTGEVRVKTNSRSVTRVQLIYKDRTGAASSIPVDTSLKGTSSGFDDDFSFYSFSTSLSAETSISSFNV…
KZM24772.1	>ST47_g4054	MKVTVALAVLPLALASPTYGTQKPKPAPGLADLAKKAGLKYFGTAIDNVVLDNKQYTDIAFNKSEFNQVTPANGQKWMYIEPVRNVFNYTLGDQIVVPSKKAGQLRRCHNFVWHQQLPTWLTSQKWSKQELLSILENHIKKEARHYYNDCYAWDVVNEAFNDNGTYRSDIWLDTIGPSYIEVAFKFARKYTAPGTKLYYNDYNMETVNNKTLAVQALVKDFQARKIPIDGIGLQAHFITGSSPSYAQIRAAQQLYTSLGLDTALTELDVRTALPDDAAKQATQAQNYADSVRACVDEKRCVGVTVWDFWDPVSWVPSTFPGQGNATLYNSDFSRKPAYYAVADVLKAAAK
KZM24778.1	>ST47_g4078	MKTVAILAGITALANAHATWQQLWKNGEDLESTCARLPPSNSPIEDYTSTALQCNVNPAAASGKCGFEAGDTVTIEMHQHNTRLCTEEGIGGAHWGPVLAYMSKVEDAATADGSSEFFKVYENTWKKAEGSTQGDKDYWGTKDLNYNCGKLDFTIPEDIAPGDYLLRAEAIALHAASASGGAQHYVTCYQITVKGDGTATPTGVKFPEAYSKTGPGLGFSIYAPLSEYPAPGPALYARGTKVDPQLLTFGEISGVPKATGGASAPAATSAAATSTAPASSAAAETPAVSSAAASKPAATSAAASSAAPSSAAPSSAAEAEPSEAATSAAASSVVASAPATSSTAAPETGDKKYDVGSFSTYLEAQPGSDAEFTIEEFIAWLEKVESGSNTAEPTAAASP…
KZM24782.1	>ST47_g4070	MLRHLLLLGTALGGAYAQTLLEALSKVPELSNFTTFYRNNEAFAALYFGNTSNYPVTFLAPSNNAFTAYYNQHQVSLFDVSPTDLLQIVQYHTLVSDLSRDNFTSSGGKGITAPTMLRDSLNNNRSTGVSLAAKYGGLERARGQVVFIQSAGQASSPNRFKLMSRQSSQPENAGVRSGLASIVSLETLDADQGTWDGGRFHIVDGLLTLPTTCEKTIRSAGLASLDSAVNRTSLWASVDSTKNITCLCPSNAAFQAAGNPDITLNISALQDVLLYHALSETAYSDFLTDGQEIKTLQNLTVRVRVEERDGNRTIWFNNARVIDANVLTHNGLAHVLDAVMVPLEQMNTTNTTASGTPSATPSSTATNTASSTAATSSAAALLAGMVRVDWVLWTFGASL…
KZM24783.1	>ST47_g4077	MYTSTLTSFLLLATTSSALSLLPRTDSCPKVWLEVLLELQTAFSGCGRDAHGAIRAPFHDCINNGCDGSLILTDECSRTENAGLSDICGKLLSWTQKYNTSAADMIQFAAATAISSCPLGPRVKALVGRKDSSDAAPLNSMPGSRDSIDSILDKFAAKGFSGDDVVALMGTHSVAVQVNDDPAQAGKSLDSTPSVYDTKFYQETLDGTAPYSLQSDTGLANNTKTHEKWADFAAGDVSAWNAAFTDAWNRFAIIGNDVNSLQDCSGIIPSGASERRLARELGGSAAARAFARLMYDS
KZM24785.1	>ST47_g4075	MKVSALAVAQAGLLNVLPATAEYVWPSKIDRMEDLLVLQSGYIREGFVDGVSPCTRNPDAPGRQTAAEWIRTAFHDMATFDKATGVGGLDASIQFETDRAENAGDAFNATFGFTNNYYDVRTSAADLVALSTVLAVGNCGGPKIPLRLGRVDATEGGALGVPEPQQDIDTHKKLFAKAGFSTEDMIAMVACGHTMGGVHGKTFPEITENNTETNVVHFDSTDATFDNKVATEYLDGTTQNPLVVAHNDTLNSDKRIFAADNNVTMKALASDSKTFQSMCSDIFARMLDTVPSTVTLTEPLEPIALKPYIQSFSLANSTHITLTARIRLLTTSEKYDDERVTLTYTPRSAPTANTTLDTTIIAKPANYKLGLSNGIFGEMFKWHEFSVALPTSTSIKSFN…
KZM24787.1	>ST47_g4019	MKTFTVLSALLATAIAAPTTPAVDASLQTRTLGSLSKLLTPKCPANIAQPDGKLPKGSISTSALVPISSKNPKTAYPNSEWAKITPGDFCTVFNLVIDSDATQGKVCNLVFDFPDYLQAPGDFVFLGSGRFSFTGYDINAGAVPGVTTYANQPRPGPSPPNPPPVMKPGNSYIVNSSPCGIPPGIGPVTVSGSLCSKDTTFLFKQSNMTCPLGFYVILTDDDGTGSAPH
KZM24788.1	>ST47_g4015	MKSFYIIIIASAFLALIAAVPLRGDANYLINTLSPTSSTSALLSALAAGVAENPPVGSVSTTKTPRAIIDVCGGCMLPPFPAGIHCAIQCNGSPHRHGVNSLPVDPVDATTSTVRQGADAADVDLDERPPTPPLPSDLELDGGISTAIESSNPSALEQGATAGLLDTVFGSCRWPMNFFFGCELDENE
KZM24789.1	>ST47_g4014	MKPTMFLTAAFAALVTAAALPVLEISSSPVAATSVSVESASTTSTLTSELYQRLNDTATSGATVSSVTASAVPQESSIGNHNLHDADVVVDALTASDPSQESTGWEYEEHSINTRLTDLIRLITSLGHIHQAILEVEPLNFSPTETDADSYIHKWMYRYIFQSDVDARKSEAQSLLRVVRRQSSREVLVWAKGLKSAAYQFVGREVKYIESQVYGKEKQYVRATVTSMWDEAFSSEDIDLLVTGAAADTSLAHSDGCGLFCEEDDVDDAMDEMDIAVECHCIQGFDECPVAGWVLEAAKKMCEKDPWGPGDGPDDVAQVE
KZM24805.1	>ST47_g4018	MRYTIAAFALAATAAAVPQYGYGAPESSAPAYPEYTPAPSSTPAAEYPAYPVSTPEAATSSKAPEYPTSSAPAEYPVASVSSKAPEYPVASVSSKAPGYPVASVSSKAPEYPVASASSKAPGYPVASVSSKAPEYPVASASSKVPEASSKVPEYPASSKPSKPSSTASCISSTTITVTVPYPTGSASVPAGHASSVPAGPASSAPAGPAPSAPAGPKPSAPGAYPTGPAPYPIPSGTGAVPSVPAAGTGYPTKTGGYTKPSTPAEFTGAASALNAAGFVAGIGAFAAFFL
KZM24809.1	>ST47_g4084	MYWLAQAFLAIGLVQAQTYPTTTNPTNSSSPLNNAESPPFYPSPWIEGTGDWAEAYAKAQAFVRQLTLLEKVNLTTGTGWQSDNCVGNVGEIPRLGFKALCMQDSPVGVRFADYVSAFPAGGTVAASWDRSEFYRRGYQMGQEHRSKGVDVQLGPVVGPIGRNPKGGRNWEGFSPDPYLSGHAVAETVRGIQDAGVIACTKHYILNEQEHFRSPGNFQDQGFVDAISSNVDDKTLHELYLWPFADAVRAGTGSIMCSYNKANNSQVCQNSYLQNYILKGELGFQGFIMSDWDAQHSGVSSTQAGLDMTMPGDTDFNSGFSFWGTNLTISVLNGTIPQWRIDDAATRIMAAYYYVGRDQDNTTTNFNSWTRDTYSYRNFYGKADYELVNQHVDVRGEHFR…
KZM24827.1	>ST47_g4064	MVLLNALALSAVVPSFVWALPAESHQEQSHVAQEKRQYYSLSANRAQAVVDTFRLSWAGYYTYAFPNDELLPVTNSFGNSRNGWGASAADALSTALVMGEKEIVNQIISYIPTIDWSTTETSVSLFETTIRYLGGMLSGYDFLSGPLAHLADDPANVKALLEQSVHLANNLSYAFETPTGVPWNDLDFSTRSVSVEPNGLATVGTLIMEWVRLADLTGNRTYAALVERAESYLIHPSPAASEPFPGLLGMNISPLTGQFLDAQGGWIGGADSFYEYLLKMYIYDPARYQVLLDRWILAADSTIGYLTSHPLTRPDLTFVATFNGTERQLVSQHLACFHGGNFILGGQVLNSPKYLQYGLSLVNGCHETYATTTTHIGPEVFGWDPNTIPAGQRSFFIQN…
KZM24851.1	>ST47_g4027	MKFFAVAALASLAHLASAVSVVGQAEGFAKGVTGGGSATPQCPKDIKELSSWLTDSTARIIVKETVTYYKAAKTPIKVGSNKTVLGIRSKGIVNGKVSDMSHKYDWDGDALSFAGADLIWVDHVTSGRPGRQHCVFGSTPSTRITLTSNFINGASDCSTG
KZM24859.1	>ST47_g4002	MRFEIALVLLACLQFVSAHLTANETSAYLQLKNDRLFVSVNKTTGGIDTLVLDGQDLLGSAAYIPYSPGGSSGNGRYGVGPYLDCYCIPASGPSSTGSGSYTPGSLDPTYQLFHGVDTHNVSYGGVVMSEVYPPTGQLLQQYWFLRDGETGLHTFSRIAYHNSTTPFLRNLQEFRTLFRPSTELWTDLVTDNELASPMPIPNPASGNLTNSTTVQDATWYIGNRTADPYAEEFADYFTKYTFAAEWRDQTVHGLFGDGSQSKDNATFGAWLVMNTKDTYYGGPTHSDLVVDGILYNYMVSNHHGAGTPNITDGFDRTFGPQYYHFNKGPAGSSWRTLRDEAVQYASPSWNADFYDSIADHIPNYVPTVQRGAWKAKVKLPKGAKRAIAVLAQNGVDYQD…
KZM24861.1	>ST47_g4001	MTRRIVYAVGLVLTLACAAMTVASIAMPRWVSYSPNGEREYSYGLHSRCSTKTGHCVPFPRTSDCDKDASFCNLWRTVGFLMSFGVVVELCTLVSFVVIMSGGVQRRVQGWGVVVGVLLFSAFIQSAGMAVVSYVFDNDARFFSGFHLDSSWSMCTASWTLLVATALAITASAFYLPAEGDYDFIPDFDIEPDDQLLSRVTAWDNGYKGIGFQYTNDPPERDPDMMSIASFQSRQSISNSVRSPSMSRR
KZM24869.1	>ST47_g3986	MLLHRGHCAYLTTTLCLSTFFSLCAGAARQNTTNTPGYTLLPGVSSVPTPITVAPDQGWDGIDGAWNTFSIRLGSQQSISHVSVSTASQQIWVVNLAACEFTSPDPSTNKDIISLDADCERGRGSLFNTTQSSTWKERGYYHLWIGEKLGLVGNGYYGFDAVGLGNQGEEGPTVDNTTISTLNTYDFWLGHLGLHPKPTNFSQGMAPVPSYMTRLFEQGSIPSLSFGYTAGVQYCTLVLSLLNGSLLMNTDDATFLGSLTLGGYDSSRYVSNNLSFGFSPDNERDLVVGLAGLSASTTTRSNIGLLTRTDVTLYIDSTVAEIWLPVEICAAFEDAFGLIYDNTTHLYLVDDLLHETLLAENPSVTFTLNQAYASDGLVEITLPYAAFDLKATPPYRTLK…
KZM24871.1	>ST47_g3977	MAALLSALAVLTAVNAQAYYSGSRAEDAFSYVQPLNTTILDDRGHSPAVYPSPNISTSATGGWEESVAKARAFVDQLTIEEKADMVTGQAGPCIGNIVAIPRLGFQGLCLQDGPLAIRVADYASVFSAGVSAGASWDRTLMHERGFAMGQEFKAKGAHIALSPVAGPLGRSAYAGRNWEGFAADPYLSGIAMEETIIGHQDAGVQATAKHWIGNEQETARYPVFTKNGTTTDTDTAAVSSNIDDRTIHEIYMWPFANAVKAKAASFMCSYQRINGSYSCQNSKSLNGLLKTELGFQGYVMSDWGAVHSGMASIEAGLDMNMPGGLGSYGRAFGAPSFFGGNVTLAVNNDTLDVTRVDDMIVRIMTPYYWLGQDKDFPTVDPSTPALNDFSPVDTWTREF…
KZM24902.1	>ST47_g3917	MKLPLELLLCIANALAAPLAPRSATLPHLHGLTPLSHDLSTTNSRHPEKYFHESFYHPHYDGRFAASVLPRPTRAFHMRLLLRSYVHAMRRAGVRTWIMHGSLLGWWWNGSMFPWDSDLDFCVEEGGMHELGSWWNMTVHPFTAAELGLREGTSDPYARHHRTRAGGSTTQHQMDGGEGEDVQKPDDLADGVWTTVLQQGKKYLLEVNPHYTDASTSDKHNVIDARWIDTSTGLFIDITTIHPVPSSIQPSTQHHISLSPGAATPAARSQPPTDMYTKDTHLYSTASLFPLRRSVFEGAPVFVPYAYETLLREEYGPRALTETWYNSYEFQRETREWVVAPDVSSANRPSGGRGRGDREDAAGRFGKVGKHREMMGDKQ
KZM24908.1	>ST47_g3933	MHLTTIRLLAISGLYLASTSASPVARRAVDQVEKIDFNAMFNGSLGTLPAMWLVSQGALAAFKTANSTHVVQRQDEQRRTDLENGAVMAAFISSMLTLPIKIHDEGVANGVCEALSASASGMGSAIVSQESGKKIFSGNSTDDDWEQGAIPGGVVGGAFGAVVGTTLSKTICNKLKKGGGKKPDLPNRPDSGLLKDLIESPTRILGDAACVVMNELLAEVGMDIAQRMHLAQQLRELLQLTELHGLARTVQHLTREMTRQIHALSDLVADAAGLAAAEAALASLASLAVESTAVLGIVQTVPLRVPSNPALENLQIITLHLSGTLELVASLPETAALAKGLRSGVYALRDQVDRQIQEQDAEDPKEEGPEVPKEEDSEHPKQDEPENDPLEDEEPVEDH…
KZM24917.1	>ST47_g3958	MRFSMVAIPVIAGLAAAQNPVSAVSSALASAAASAAASQISSAQYAASSVLASASSRAASAASAASSHVASASSHAASAASSAASVASSARSAASSYVASPSSRASSAASRATSAVVAPTGTGATATASRTSSGVAQFTGAAAPIAVEGLTGVIAAMIGVAALL
KZM24920.1	>ST47_g3957	MRVSELLTFTLASAAFASPVEERDAKVIPSQRPNYPIAPYHPGKAFPASPARTRTCIVEANGNGKDDSSNILSAIKSCNNGGHVVFPKDKSYTIGTALDLTFLQHIDLDIQGTIKFTNDTDYWQKNGFFQTFQNATTFFQLGGVDVNVYGGGTLDGNGQVWYDLYAKDIYILRPVLFGAIGLKGATIEDLKFRYSPQWYTLVANSTDVVFSNIDISGASTSKNPAKNTDGWDTYRSSNIVIQNSNINNGDDCVSFKPNSTDIVVQNLVCNGSHGISVGSLGQYAGEVDIVKNIYVANVSMSNASDGARIKVWPGAASALSGDLQGGGGSGQVSNITFDGMTVSNVDYAIEVTQCYGQKNITLCNEFPSKLTIEDVTIKNFKGTTSKKYDPLIGYLQCSS…
KZM24922.1	>ST47_g3951	MRLTFAVACLLEACFAVSTVNRKACQQPTTNPLDGCPKNTLLVGPGQTYKTVQSAILSLPNNTDASHILVLPGNYTEQVNVTRPGPVYLFGQTKYPNDQSKNTVNVIWSNATGSGITPNVDNAYTSTLTVAPTFNSSITGSGPTGNPVPADTPFGNSDFRAYNLNFVNDYRPYSAGPSLAVSVSYANAGFYFCGFYSYQDTVYVGKLGNAYFYQNEIAGQTDFFYGFGTAWIQSSLVTLRNCNGGITAWKGTNTTFVNKYGVYIHDSKVQKANSSLELTGKCALGRPWNALHRSIFANTYLDDSIQPAGYIKWSASDPRVAANTTMAEYKDYGPGFNATGRAASNITIVMTDKQYEPYSAVDKVFQYPFTGKFGNTAWIDSDPER
KZM24925.1	>ST47_g3952	MRFSTVFTGVLFSLASLSTTYAAKSFSGSNLYYAAGLKEAQQTTLLEGLQSAGVKVLRVWLDGQSGDTKGTPIDDFPALQGDSPDSWDDTVLNRLDKFMVKAYSYNIKLLISIHSYNALEGNKDFYGKWYGTGDFYTNSEAMTYFKERIAHVLAHVNPATGRTWAQSSEYIFAFEAQNEAMHPQGNPAALATWQCTMAQALKSSLGSSSIPVSTGGGSYLATSLLDAYFTCAALDILSIHAYGPGDFETSKLQTYVAHAQTAGKALIMQEWGACYNDGANNKCDGTTPLGVDARNDNIKNWAAQIDAAGIPWFYWQILPNPDPHFGWDYEVGIDDVNWTALQEAGLEAGQADAAFDFEKWLL
KZM24926.1	>ST47_g3924	MFTKASVVAFFASMAAAQLHPAVGEPSGNPITRPLNEVVPACKAFTITWQPTTTNTVSLLLLRGPSTNVVPIQTLAEGINNSGSFSWTPASTLEADVTHYGLQLIDDVNGQYQYSTQFGISKDDCSVAVSSSSVAPVVPSSAPAPSSAPAASSAPAAISTPAGYPVASSSSAAGYPVASSSAVKPSVVAPYPTTVKTVSSAHAAGTGAPGYNGTIVQPTGHLTVPSSLRPSATGAGNGTSSATLPESTGAAGSLKAGLSLVGAAALAALML
KZM24927.1	>ST47_g3925	MVGHWSTALAVGLLALGSNASPLETEKLAKRAPSFDYNGQKVRGVNTGGWFVLEPWITPSLFEGNSAVDEWTLAEMLGKDAAKSKLQGHWNSWVTQDDFNQMAKAGLNHVRIPIGYWSVIARDGEPYVQGAYDKLGEALDWASGAGLKVMIDLHGAPESQNGFDNSGKYGNVGWTQGDSVDHTIKVLNKIRDDHASHPAVSSIELLNEPLGPNLDMNTVRQFYMDGWGNLKDSNVAVTFHDAFQGVTSWGNWGAGMWNLLLDTHHYEIFTTDAVSMSIDDHIKTACDFGKQMASTGKWTISGEWTGGITDCAKWLNGKGKGARYDGTFGGAGKTGDCTGKSTGSVAGLSEADKSNIGRFIEAQLDAYEKANGWIFWTWKTEGAPEWDMKDLLANGIFPS…
KZM24937.1	>ST47_g3949	MVRDLLSAVLVAATLAGTAYAGAKCTKDSHCPSDTPCCSLYGDCGVGAFCLGGCDPLMSHSFDSCVPGPVCKSGTWALDTLSNVQSIDKYLGDASKIDWQSQGMPAIYTDPSSGTKSTLLTMAQGTVGTLMASTHYVWYGKICSKLTTAQGKGVVTAFILMSDVKDEIDFEWIGVDTAHVQSNYYSQGVTVYTNGKNLTVDGGNTVESMHEYCIDWKPDSLTWSIDGQDTRTLDRKDTWNGTSGRFDYPQTPARIMLSLWPAGLPTNDKGTVNWAGGEIDWNSPYMQNGYYYARFQEVTVDCYDPPPGIQTPGSKSYKYTDASGTNNTVQITNDQVILGSLMGTGEDPGEAPKSGGAKPTATDVANVPGGNVGGGNRAEETSTQAAASGTGSGAQATGD…
KZM24946.1	>ST47_g3960	MVAFSHIAVALSAVVGSFAAPTANAVEDLPDFELTNVASLVRRQDYNQNYTTSGNVNFSPNSSGYSVSFSNAGDFVVGKGWSKGTTREINFSGSTSATAGTVLVSVYGWTQNPLVEYYIQEYTSNGAGSAQGTKVGSVTCDGSVYDIWKHTQVNQPSIVGTTTFTQYISNRQNKRPGSGTVTTKCHFDAWAKLGLNLGTHNYQTLSTEGWGNAGGNSNYTLTGS
KZM24963.1	>ST47_g3904	MWSKVCKIALLAGSTLPSALASPLQPNTSPNVFPNTDQWPLATVGKALEQQLPDADLQAILAHVSRVNIEATIRKLASFGTRHTLSSQTDPNRGIGAARDWLTVQFRKAAKASNGSMSVSWNSFIKYPGDNERIIFPVNITTVVATLTGSEDPERFYVVGGHYDSRNSDPVDYEGDAPGAVDDASGVAVSLELARIFATYKPKASIAFAAFAGEEQGLLGAENLAKTYKNSSTNVGAMINLDMVGNSKAEDGTSDPYNIRLFCQGTPLTENATVMTSRLSIGGDNDSPSRNLGRHIYEVASNAFTQMTVRLIYRLDRYGRGGDHRPFLESDFNGVRFVQPNEDYTQQHQDIRIQDGKQYGDLVEFLDFEYNTRAAKVVASTMWSLANAPGEPTNVGINT…
KZM24973.1	>ST47_g3867	MSRLSTGRIAAIVIIFLFIVALFQNDDAGTYAFLPSFSRTKKLPSYPPTWLRERMALSEKSWKKSVELRETMAASHPANPKIPFFPTDFLKYPFTVWDFFPATWTCPHDFQRVGRLGDGGKWVCGMSIYESIPTPKPISAEDVEVREAAIQAAEQGLVIYSFGINGESSFEAEMLERAPSARIWGYDFSVEGWGKQIPTTERHRTFFKKVGLGKEDKHEENPAFWTLPTLMKENNHTYIDILKIDIEGSEYDALDTFMDAFDGVQSASGKSVLPIGQVMIELHLGNGDITDKVDFERFRKWWERLEKMGMRPAWIEINLFAVTLGQEKSNPRCTEYVWVNAKDERSVLWRS
KZM24976.1	>ST47_g3860	MLHLFKLLALLSLTTLILALPTGPPPLSTSATLKHQPNHPNSAPPRKSLTVALSTTKLEATKRPPQSKCILICTHAHCDLLCANPHTTTSLPVSTSSANPTITNTTSTSSTASTNINTNITTTVPQPAHLTISSLSSGMDAVILDPRSQTGQMQRCAWTCSAATGVCEEKKCWAAEDVEGAEGAEGTGAEHVDEGETDGQGKGGGGGGGGGGECEVLDTEGAGRVVICFLPSEEGDGKAIDDRQCTLFWRGGMPRLVCRWE
KZM24977.1	>ST47_g3863	MRPRFVHLLLGIPLLIIGSTAAAEKPALILVPGTFHRASVYDEVKSRLEDVGYEYVNAVDLPSNGYGVADVERTADVDVVTQLLETRLEDGEDVVLVGNSYGATVIMEAVRDFEDRSAVPAGEKTEGKGRILGLIMLSGYIPTIAEVNHCPPRPDIRVIGAPFFSYHDFLNSTPTLVSWDKDLAAYPPSLTFYNLLNASAAEYWTSQLLPSSFKALNATGTYVPYNGRFRTLYVVGEHDNCVGPAFAQGYIDQEGAEFEVEVIDGDHVPMLSRPELVVNVIRRFAEETVAGENEEL
KZM24999.1	>ST47_g3878	MLHKIVLALPLLSLTLLAFASPLEQREAAPGLIDDLLKGTLSQVQQLIKDVLSGTKPGIDNTKSSKPIVCLSAIDSCCASYDVSKELTSLFLEADGQCNDNARAAIRFGFHDAGSWNKDSPNGGADGSLLMDFGEERRPENNGLQGIRQVLKGVQSKYKVGYADLAQYAHNHATISCPKGPRVRTFVGRKDATQAAPTGLLPDVHDSADNLIALFQAKGFSAHDLAALVGAHASAKQRFVDTTKANKPLDTTPGVWDVEFYNDTLQTTPSDKIFVLPSDKVLSVHPKINDEWRSFVGNQPHWNEDYAKAYFRMSLNGVTNLKDLKDCTKTLPASRPNFKIPKPR
KZM25004.1	>ST47_g3875	MHWSIAVLSYVLGSALAQNPGSGYNSTAPTGPAVLTADMVSSMGNNTLFDRWRPTYHFISPAGWMNDPCAMMYDPTTDTYHLQYQFHPNHVNWGNISWGHATSKDLVTWTDVGGWENDQAQSVGTGPDPDSRNSSYYGLGIFSGSAQPYNLTGGQDGTLIAFYTAVQHLPTNWALPYINGTEKQAIVISNDGGETWEQYEGNPIISEHPEGWNVTGWRDPFVEPWPEMDAILGQDEPHWYMVLGSGIKGEGGGGRIPFYSAPQSNLTDWTFLGALWEPKSNETLGSLLETGTYGFNFEVSNFFSLTDEDDDVHYYVLMGTEGGNLTWHPRAQWGLWNEGQVTRRENGSAEFTPVSGGVIDSGLLYAVTSFNDTKNNRRVQWGWAAEENNGFGILQSGYQ…
KZM25042.1	>ST47_g3792	MKSSQILASVLFGSLAAAVPFKRDLLTKTEVQVETVVVYTTVWDDDVPAAEATTTAGGYFFEQPSSSVAAETTPVATSTPASTPAYTPAYTPAYTPAYTPSAVQEPSSVYTPPVQTPTPSSTVVVVSSAAPVETSSAPAPVAPTTTEAAYTPAPVTSAAYTPAPVTSAAPAPATSSAAASPPSSGSASASSSGSGSFTGDLTINPLNGALGACGKPLYPTDMVVALAAPAWGASTYDAMTGEATNPWCGKKINIEYNGKTVPATIMDLCPGCSGHDIDLSDAAWAAIGMTEWTRVKGSWSLAE
KZM25043.1	>ST47_g3791	MKLPTLLTSAFVAAAMAAPTISPGSTVATEARWDYGSSNDKRNPVKTAAEWDFGSTGNERDVVDTDWDHGKKKGEMLSPPLAVALLIWSAL
KZM25050.1	>ST47_g3808	MRIMARLRRCLFVALSLIGPSYQKDPIVDFCRRWAHQTAQVDGRLYIDGGMVDWNPESMNYTNTWLLFSDLNASTLGLGQPPQYANLSKPSDIPSVSGGILWPDEANKCFYQFGGEFTAGLPSEFSMHTYDVVLDQWNLTGNKAAGVFTTQRAAYGGGTHIEGLGLGFYLGGWMSNQTSPDWTGPAVATADLIRFEYSTGLLYNTSGPEDNVGRAEGQMVYLPVSDSGVLVYFGGIEDQHQNGTAAPANMSNIHIYDVASSKWYTQTASGSIPEARRQFCAGVTWADDQSSYNVYLYGGHGFGDSPGFDDAYILTIPSFTWIKVFPTANNTAEYPHGGCSANVVTRDQMLIIGGWFPESDQCDSPQIQGQHLMNLGFNGEKQALWDKYDPSLSTYSVPT…
KZM25064.1	>ST47_g3781	MLENWQGAAPHAASSLFAVAAASWASVAGGKVPQPYLDEFFHVPQAQKYCKGDFSWDPKITTPPGLYLIAKLFQPIVGCSTKVLRFQNVLAIVLVFHTVLHILRLVRERVDPQRPTKESLKLTNEENIKNGLSVNLDGKMPVSNALSAVNISLLPPLFFFAALYYTDVMSTAAVLLSYQIFLHKRSPAGDIRNDVSTVFVGIVALFFRQTNIFWVAVFPAGLTVVQVLERNEPWMQMKEKKPTSILQECWKTNTVYDGSVYDAGLRDVIMFVLTIVPAALRKPIVVLRSIASYVVLLVIFAGFVAWNGSVVLGDKSAHTATIHIPQMLYIWPYIALFSAPILLGPLYRIVGPFMPPQLKKMLGYTPPKNGPSLPELLPATLFIAGGLAAVHFNTIVHPY…
KZM25076.1	>ST47_g3813	MRSTALVACLVALSSTALAASSDSCQAQNIVDACVAGYQDRIQKCTDNNANDWICLCDVYTDVLTCYNNCPDSNEKPPVQNQVTQYCTAAEPLRVASSASLASVAKTATPAPSTSASAAAATGSATGSATGSATATGSGAAATASAFATGAASSLTTPAGAAIVALFAAAGLF
KZM25090.1	>ST47_g3777	MREKTAGLIFALQSLAYPIKELAKNFFYANYVAADCGGCMSFLVPLTRNLRPSALDDAMGAVGLAVLSNIHLHPTTGFQGRECYITALSQTNHALRDPVNTKKDEVLAAVVLLAMYENVTCNDASSLDRWIRHLDGATRIIEIRGEKQLDTKEGLALFDFLRAQISTCMLFQERYSPTIIRRLTEVAKQRRPRGDRLVDCLSDAVTRLVDFVATLKRGPVLQTDAVVRQAMSLDAEFSSLLLDIPPLWTIATVELPQPDGGRTAQALWGSYYHVYQSVAASAMWNNYRSARLLIHELVFNKTRDTLSVNGACQSQPRVVMSQCQQTSAQLIDGILASVPFHFGAIGLDRLHSTEDKVALGCPMMLIWPLLVAANSGFASESHRRWISSCLGRIGHTTGF…
KZM25094.1	>ST47_g3773	MRLTIAAGVLVATVAAHPQGGSMLGLPLGIGALLKSLGPAPANDPRFTNFKPAGSGDVRSPCPALNTLANHNFIPHNGKGNTIPVLIKGLAEGLNIGADFTVAIGGAGLLSSPNPLGGSFDLDDLNMHNFPIEHDASISRQDAALGNDQPFYNPNWQQYIAFFNGKTVTDVPTASKAKFARYNDSLTKNPDFTYGVREAILSYGENALYLQAMSDPVSGMANIDYVRSLFEKEQLPYNLGWRPSKAPITLASVGNMVVQLYGSSPVPIPEGAKILADSYKDVLVAVVGGSNILANLTEGISSTLGLSNSLEYQNDSWIRLVSIEKAIDVSDIHEELKINLISSPLSTDPPYTALSYTCGDPSPNTDPCTNISTKVFRCYPVLCRDRIILASRDLRDALR…
KZM25101.1	>ST47_g3755	MFGKTILTVAAAMGAAIAQTGPGFPVPATQALTVSFGNNTVSPAGELIPRPETVNPPSISTPVWWASSDTESPNPPLGVLLIVDLDVPRNNTRVQLLHWLATNVSLGSGGTNSSSTPLVIPNGPVPYLQPSPPVGDVPHSYNIVVFRQPANFSIPAQYRNLTNSRLPFNVSQFVSDTGLGQPFAGSYFKVQNLTGTPTTTYPPARSPTSTSGGNGSSPLPFSGAATQLMSDRTMWVGLSTALIAGFAAFAL
KZM25103.1	>ST47_g3753	MLSSTLFLLWATFLQCVVGMEMKRQQRTVMTGSGTLGGTFYYNFNGPNGELCHAEVLFRIAPGNGQPSFRVNEVWCNTRLGHTFLRGAVGYSAVLDRGQGRLPSFQVIELGINIPNQALVMAQGLYRFNGAQPRINASVDRWTPNRFTFNAFRLGFLNPRQGAHCLADASGTICDGSSKRDPQGGFAHGVDRFCYATCPR
KZM25116.1	>ST47_g3739	MRGRIATVLAALLFLTIIYLCTPKSAYPLHIPGGYPYVKPKTPAIYAPTPNPPSTTPPPKKVIVKVQLPGEDLSWLLKLLPEWRNQVITLDLKFARLHDGAQRVDSGRIADAYLSWIVTNYANLAETMVFVAPALAQQEADAMKWRLPNQELISAIQHVRIEEVRKQGFAPLSCAAGTACQEAISPLREPPDEFRTLEVRMAKAWEGLFNNTLVPAELASPGGSEFVVAKEQVLKRSVEEYTRYWEWLARTKMDDDSAGALVQRLWHVIFGRASVWCPGAKECECGVFGRC
KZM25134.1	>ST47_g3731	MSSFLKIALPALAIAGSASAACNTTATLTIQNAGDATALAACSTFSGSIAVATGTTDDIAFTSVKRITGDLVVADNSDIKRLSADTLDTIDGEMRLSGLTRLNAVDFPKLKTVESIKWDALPNLQTIGFTSEVTKADKIDIQNTALRSLKGINIEQADTIFIANNGYIDEIAMQLGNVTESLTLANNNEDLKVTLPNLIWAANLTFRFVGSLEMPSLETLNGSLGLYNNGFETFSAPNLTTIGEALALVANEELSNLTFPQLTKISGNLQIANNTNLTTIDGFPELTSIGGAFDISGNMSTVETPKLNSVKGAFNLQSTGNISDVCANFYKPLKDKKYIQSTKYLCQGALVNPGQSGSKPTSQSGSGSSDKTGAATSLSAVNGALGLAAMAAVFLL
KZM25152.1	>ST47_g3699	MSVITRCASVLLGLLMLSTVDQSEAVGTTTSRTASGPRERVSLNADWRFRRFVDNPDGLSYETLKPWILPAANDFLSGSKYERPSEVGPGSNVTYVQPAFDDGAWEAVNLPHDWAAGGDFDFSPELDGGTGRLPINGIGWYRRSLALDPSTIESGRSVFLDIDGAMAYATVWLNGQLVGGWPYGYNSFRLDLTPYAQAGDNLLAIRVDNAPDSSRWYPGAGIYRNTWLVIVSPVHVAQYGTYLTTPKISPEQATIDLKVEVENKGNTSQTVQVTTEVFELDALSRRASGSAVAKISAATVSIPGGVKQSVNGSTTVANPKLWGPVPKQTPNEYIAITTLSSNGTAIDVYETLFGIRSITYEADQGVLINGIHVPVYGTCNHHDLGSLGAAFNYRAAERQ…
KZM25154.1	>ST47_g3697	MLYHLLFVAAVGSVSALPAEPTLAARGPINCAKVDGAIAVLKNLGTPATTFCSSFLKIPAIATATATIIPTRTIVISTVTVTTFSSVCPAPAEDPSPQAITMVKKKAREAEAEPVVNLLPLLIAFADAKISAGCCCLNIKPRATTTATVTAAPSRTNIISTTTSCVNPDPVVLTIPVNGLCADGPAPCAQGSSCCQAPDPDDVYRARCRVDGCQK
KZM25156.1	>ST47_g3705	MRIPTTFTALFLPLTTAFYMPWLALMNCRSGIPGAVYVCSNAHFTGDCMYHAVSGECFAPPSAPMSIGPDQGGHCVVFEGRECEGEIIRWDLGDGGKK
KZM25157.1	>ST47_g3700	MLRLLLTSVVAAVVSAKCYEPTFAHPLPEYDVGDALPAHAFAELNTAITSAVAAPEFAATSFSIAITSSKQTLWSKHHTARERNASRPDIAEVNGDALYRIASITKTFTVLGVLYQEKAGNLSLDEPIDKYIVELKEAQNGTLPWKDITLRSLASQLSGIPREWAQGDLINFEKWGVEDPVNWGLPPVSRQGLCICGEFSPNYKKICTESDLLDALKSKIPIFAPNQQSTYSNVAFELLGMVLERVTGQSYRSFIEEAVFKPLNMSKSTLSLPPDSAGVIPLGPQYWDVDEGIQSPTGGIYSSSTDLSRYLRYVLTHFNGITHALNWFNPASPTRGLNSFYAVPWEIFHTDRALQNSRRTVRFITKGGGLPGYTSNIIIAPEYDLGITILVAGNPELLP…
KZM25169.1	>ST47_g3676	MRFEVAALIAVAASASAQAVVGKSYGFASGVTGGGEATAVTPTTADELAKYLSDDTERVILITKEFDFTGKTATGSGCDRKSCSASNGGQFYLGELSCAASDDNVPVSSIKYDTAGPEPLKVGSNKSILGVGGKGVLKGKGLSLAKNAKNVIIQGLEFTNINPGVVWGGDALDFQGGNDGVWVDHNKFSLIGRLFIVSHYSASRLTVSNNEFDGVTTTSASCNGNHYWTMMFYGDGDKVTLDRNYYHDVAGRAPKLGQDGTTGTFHAVNNYFENMKGHAFDAYKGAQALVEGNAFSSVDQPATDKAAKISTFIVDGGSACSSVLGRACLANSVDSASGKLAGGSTTSFISALKGNDVTPLTVKDVAAHVKANAGPANLGAAEKEVSAPTTSKAAAPATT…
KZM25184.1	>ST47_g3691	MHSSALLTSAFAVGALAWPNPFEKRQQATVTVTVTFNPYATPAWTAPHFSQTPNTRRPTNAPPLWTPPRVGASSVVANPAPIRSSSVTSRPAVPITSTRPSSSVPPVIAPISNRPSTSVAVPVSVPSVGVPRPSSSSIRAPGASSSAAPTAAPSAIAGNDHISGTSQASLSVGPEYQRAILYHHNAARANHNAGPLVWDDAVAQTAAQAANTCKFEHYIPTGANQGQNLFTTSGTVFNVTAGITESWYKGEFQAMLPYFGAANIPDDVFHNVGHLTQVLWKGTTKVGCVSLDCGTRMMVGGQPSNLNKYTVCNYSPPGNVYGQYATNVGSPISQSDAALGHWYD
KZM25194.1	>ST47_g3668	MYTSQFALVATLAAWVSAHGVVTEIQGANGVNMPGLTVADGTPRDCSSNGCGSQADTAIIRDRDIASGKATPLGRTQGNGPVDASVMVAAFMGSGTAPPTNQGASGSVGVEDNLPENAQGGAGAGARRRQLLGGLFGGGGGGGAGGAAGATGIAGLLGGGGNKAEGPPEARVAAAQGAGASTGLPTCADDGTVTMTLRQINQDGAGPFTADVDGTSGGTDEAAMQSETVTKDVPGLGVQGISLATSTEFEMKVQMPQGMTCDATVAGTPNVCVMRVRNGAAAGPFGGSVAFTQGTAARKRAIAYKLKKRMELSRKN
KZM25202.1	>ST47_g3680	MRTSSLLYPWWALPLLQPCRCSRSTPLEHKPLLSFNSAWQILGPFQIGTREATWGADPLEVDGGFRGLDYDPAATFKSSLPANGTAYWNITIADTSSGTASANASLSVSYSNVDWDFLKTVYGWASVQYQAWARGELIVGGNETQHIILYTDALLEYWINDTHYFGGDFYTYRNAPPVLHLGPGSHRIDLRLVRDVRAFGGILEPTIDVVVGVEQVSGSLDLARPGILLSDVIDGRLATPHASITLRNSGVQDIEITRVRAANVSTNVSTLFPSIGLGTKSQMLVARDTDDLTYEQGTNDAAENAQGTRIIIAAGQTRPIAFNVTLPSHNASSIAYSITYKVVDSSHRASLEVTQDLKHMSPYEPHKMTFIHPGGMVSYAMLRPPAKNATCRHKQTKLP…
KZM25222.1	>ST47_g3636	MKYISALPIVAGLAAAQMQVMNLAPAAASGPTTHTVVVGGMKPVANGMVPVLGYNPESITANVGDVVEFQFMQKNHTATQSTFAEPCKAMEGGKDSGFMPNPDGAAGVTWNMTVETTDAIWMYCKQENGEHCGKGMVFSINAKFDGDKTMAQFKQLAIKSNGTTLQDSPIQLVNLAAAAATPSPVTVLAEGAGAGATASGSGAMASATVIGGQGTDGAGQTCTCSCLCGMNSFPASAAVNNFGGFAGMIG
KZM25227.1	>ST47_g3643	MMKLTVAFLAALAAADAVEARSARHQRRQYGSGYGTGSGYGSGYGETPEVSSAPAVSSVPAASLPAPSVPAASSTLDYGNGYPVPSVPAGGESSSSVAVPTSSTPAAETSSYPAEVPSSSVAVPTSSTPAAETSSYPAEGASSSVPAVSSSVPAVSSSVPATSSTMDYGNGYPVPSVPAGGNSVAVPTSSTPAAETSSYPAEGASSSVPAVSSSVPAVSSSVPATSSTLDYGNGYGHPSAPVGTGASSSVPAGAESTPASGIYPTSSIYVPTGVGSSSYPVGTGASSSTPLASEVSKTYYPTGYPSGTGPRPTAVTAFPSGTGSYPETTPMSDYVTSVIYSTQIFTVTDCPSTVTNCPARATSLITSVVPVGTTVCPESDLTKATPVPSASVSKHDVTS…
KZM25255.1	>ST47_g3601	MRVSALAFASVALAARPFLNEPNTGIEDQLGSIVPNGTLAPLENIVGLPDFEWAARRYMNTSSYTYYRNGAAGEWSYRNNLEVFTRHRLRPRVLNDITNVAASLPTTLLGHNFSAPFFISPCARGGYAHPDGELNFVKGAAARDILYMPSLYSSQSFDAIYAEAANTTQPLFQQVYLTNNLTETQALFTKIEKTAKAKAIILTVDSPGDGIRHRAARYGVGSADINLSLLTWDLYRQFSEMTSLPIIPKGIQTVEDAQEAIKNGAKAIFLSNHGGRQLDTSPSSLEIALEINREDPDLFNQVEVYADGGVRYGSDVLKLLALGVKAVGLGRPFMYSNVYGAEGVEKAIDILKYELINDAANLGVGDLKKIGPQYVDFKNSINNWYS
KZM25261.1	>ST47_g3591	MKASWAAIGALLSFVHQSSANLDFITLPAPGNSWIQEAVATLVLGDVPSNNQGDVALWSAIMMDKQDFLQGVTQNSANSPWCQNLGQNWCNFAYTLVGSSTVTNGTPVKAKRGDRVRTHYKLNSQTQLWDQDLYVNDKLASHVSTSKGQHGRIFYVSIECASGSCPMTPAHSWENISVTLNKADQSFKHAGAWAHGATGGAMSTTDGGKTWNFSKLNIPAIVAA
KZM25270.1	>ST47_g3582	MKSATALLALCAVLCGRVAHAQEGFRIPSPDVNDRDPSLTIVQGEVVQLAWAANYTYQPSVDGKPVMGSDGRASLWLTSWAWNGARFGKLLTPSVISEGDSSWAYQVDLTDAEIDRWNGGFTYRLMKPVTSSNAAFEDSDTAIVSRAFIVRKKSDVAASIASVSASYSRALAASTASATQSTTAADAASSTATRTAGSSGPPSPTASSPAATATDSESSSTASGDPTSTPTGGLSTGAKAGIAIGAVAAVAIAALAALSLIRRRRKASHVAAYNDQSAAEKFTPQPQHSTVYRHEAPDAAPAAHEMSAHQRDRAYAELDGSSGKP
KZM25314.1	>ST47_g3470	MRASTPLLSAKTLLALSAFTQIGVIADSSINVALRASFDPAPYLVELLETAAEENATAYFPLLDRISEGYLDELDTERQLYEKFVELLKSDGHITDPETLASFNLALSVRSAAPRIEAHYQFYKTSVEPSLESEQGKNCQLWVSLGSQQYCTPHIDDGEPIGSIKNERTHELPFDRVLGNSSALPTIVYADISAPRFKKFHKTVSKTAKEGKTSYRVRHKPSLKGPQTPLVVNGYGVELQLKRTDYIVIDDRQAAQDEKPADQKPIGTELDEEAADLKPLAKDDVAGLAEKAASFVLQSDQPMDTLLKLVRDFPKYTTTVAAANATADFLTEHYSNRELLLPTGYNVIWINGVQIPARDVNPYALLVHLRREKRLINGIRSQGLSGPDTISLLSHSAIA…
KZM25321.1	>ST47_g3479	MKCLISLLSLVAVLPAVQGIVFGGPAPTAATLKRALDSALPKPTIAPTNDELKKRQTNLHPETCGWVDGIYSSGVTCPGSRTCMLYTSAASGMAGCCDGANTIDCGWASSCVDAKAYRSEGCGSDCLLNSFIRKCTATTAPYCVTWLYPSNGVHDYGCAANSDSSVSTIFETATDAFGATTSMHLPTVTANAVSTDVPGSTTRKTAKKVAIGLIIGVVVAVLFVLFCVVIGIVFCIKKKKKQRQIAASTQAMAAVHATRPQSQYPPNQQQYPYLPTQQQQQAPVQTQMQQPSPFHPLIDPQSPASATTSYFAHGAHEEKPNAHTSVQEYAMTPISSPSTPAPVYTQPHVVPPPMPVPVVSQYRAPTEAHEVDAISVPHAPNQAGPVHEMGNGK
KZM25330.1	>ST47_g3458	MISITKIIVVAVAAFGSVQALPQGIAPSSTISPPAAPAPTDKQTYLFRDLFTAPTAIKRFQRLLTQDEKLLTGEDLKKLTVFSFNNGTNSTGGVTKAANIDSFPILTGLGISTTLGFLAPCGINTPHVHPRATEFLTLVEGSNLKFGYVLENNLVKAGQNPEIAGALNKFEGTVFPQGSIHFQFNDNCEAATFVAALNSEDPGTSQVAQNFFALNSGVVNATLGFPKTIDGKNIEEFRNAIPANLALDVKVCMARCKKE
KZM25349.1	>ST47_g3545	MKYAFAFAFAGLVAGALAGECYAPAPPAYSATASAPTPPAYSAPPAPSATPAPGPGYFAVISSRSASPVHLLSLTARGGKFYLGAGPPSSYCPENIGSGCPPGNDTIFAGGDGTLSLGVVVPGGQQVYVAKDGALSYTVPHSAYIPEGSVIDQFSKTAPGSNNLGTLNFETGFVACPVGGTGSGYQVYGQVDGFEASSECLGFSALTSASEQPGAWQY
KZM25351.1	>ST47_g3549	MRSTTLSALAGFAALAPFTAAQSTSSKRGLCHVPSQKYPGDDSIWISGGSDLTWYYNYQAEPSDAYKNKNIQFVPMLWGAKDSDTGTPFYDSVKSQIDGGANISYVLGFNEPDGTHTTGGSALPVDLAAARWIAEIEPLKKLGIKLGAPAVTGGASGWAWLQNWFTACNGSCTPDFIPVHWYGNFDGMASHIGNVMATYPNMTVWVTEYALPNQDLKTTQDFYNTSKNSMDSWGNITHYSYFGAFRSDVSNVGPNAAMLDQKGKLTDIGSWYMGGVATNNIPKGAGGRIQTIGLPVASVLALFWACML
KZM25360.1	>ST47_g3568	MLSLRLLLITSLVWATAALKVSKDARCGRKFDATCQGSIYGGCCSNYGYCGSTKSYCAVENCQPGFGSCNGKQAGTTMNTIVSASCPAAKPTTVTITSTTAKGTITKSLTVTVSGATSTCPAAGKTTITVPTTVTQSAVASTSTTTTTTTVAGADATTTLTLPAVTSTETLPAVTSTQTLPAATSTETLPAVTSTLTLPAVTSTETLPAVTQTMTITSSLTLPASTVTSTSVRVLTVTLIVG
KZM25361.1	>ST47_g3569	MLIRLLKIPRSLVLLLAILAFFTWQLSQGSSHEPTDASPRAPGKANKKTARIALMTFVTEQRSYLHLSLKNKDHYARRHGYDFVVDYEAHNDRTVMFWKFDMAEKLIKSGKYDWLWWIDFDTLITNTATKVTDIIEDELRNATNPDDIDFLLTHDCNGLNAGSFLVRGHERSLKFMHKSVAVYDEAKRKDVSMSEQDAVVKLLNEDKKSANRARVIPQWKLNAFPSEIACFDEEQKVWEHGMFVLHFAGAWAHVKGEDPTGYLMNKYEGDIMWGDWKEFY
KZM25367.1	>ST47_g3505	MKFSATISAALLASGVVAAPTPGLVSSILGLLTNDLNQLLNSLGIKIQVNGYQHGATVKYHSQCPFTINPVPVVNKTNSHDLSFPKSSGFIDWKTFKANGANLGGWLEKEQTHDPIWWSAVGGDGAPDEWTLCQNLGSKCGPALEERYASFLNTTTIDQMAAVGVNTLRIPTTYAAWVQVPGSALYHGNQQQYLKTISDYAINKYGMHIIIGLHSLPGGVNNLDIGEALMHDGWFYNSTNLDYSFRAVDGILNFIKNSGQMSSYTIAPINEASDNLAGFGTPAGLSVNATNWINTYHSGVLKKIAKVDARIPMMIQDCFQGASYWSPFYPDGTNIVFDSHVYYFAAAGAYSQYINPAICGQATYLAEETKFPVFVGEWSLQTMYNNTLASRKALFDTQR…
KZM25369.1	>ST47_g3503	MAIIAFAQAFQLLLVIGLLCSLTDSKTLVSHPRRHAVTSIQTLSRRQNATADFYPILGVVGLGINTTYARLEIRELQRKPDLFNVYLLGLQRWQNTSQDDKLSYFQVAGIHGRPFSPWDGVPGRTQPPEGYKEGYCHHSSNLFPTWHRPFLALVEERVHHHASEVIAEFPEGDLKTRMTSALPALRLPYWDAAAVPPIGTGSYPWSVQRKTIEVELPDGSGSVKTTISNPLYSYTFHPLPGKDMFGKLPWTQWHTTIRYPSDRTAAAQSQDSKIASQLDLNLVNLRQRTYQMMAMQKDYHNISNNMVSLGGVLDSLESVHDTIHNTVGSSGPGHMTNAAYSAFDPIFWLLHANVDRMTTIWQALNPDSWVTNHSNPTATFTSEAGAYADENTPLHPFHR…
KZM25374.1	>ST47_g3520	MKTAILTFALAALVSAAPAPLVPRAPPGVPTTAAAKTQLAGLTVAAQGPQTGYSRDLFPHWITQSGACNTREVVLARDGTNVVQDSSSCAATSGTWKSPYDGATWTAASDVDIDHLVPLSNAWKSGAASWTTARRQAFANDLTNPQLLAVTDEVNQAKGDSGPEEWKPSLTSYYCTYAKMWVRVKSVYSLTITSAEKTALTSMLNTC
KZM25375.1	>ST47_g3521	MRLLALAAALAALAHAQNLDITVTTPVECVRKTQNGDSVQMKYKGTLTDGTEFDSNYGRGTPFEFKLGAGQVIEGWDKGLLGMCIGEGRKLIIPPGMAYGNQRVGPIPAGSTLVFETELLGIKGVEAEPKPIDAGNEPILPVKPTPTQLDEAPKSSDVAKEENMPTPPAEASSSVAFALPTAEPSNIASATGKHPLDGEDGKGECNLLGDFALIVQGALGLLAVSSLAVKRLREHPRRPMKIWFFDVSKQVFGSVLLHLANVLMSMLSSGQFDVQAQTQAVALTAVATEKGDEPNPCSFYLLNLAIDTTIGIPILVLLLKVLHRAFLLTPLASPPESIRSGNYGYPPRATWWLKQSIIYFLGLIGMKLCVLAIFALLPWIAWVGDWALRWTEGNTALQI…
KZM25382.1	>ST47_g3528	MHSLRSLCTYLLLIATAAVVMTANPTSSHIFSCTGGSLYFTAHPTDIFLYQNPSLFHELYVYKCVTTVVFTSGDRGIVGNHSRSLEQGMEAAYSWMSGDNETWQTSTLRIGESDLKLSTHSEAFNMQIVYLRLPDGGPAGRGYEVHNRESLRKLYRGDIETIATTDGNATYTLESLKDLVAAILLESNATNVRVLDYKTGVPDDEDARYAGSFARRFDSNLNGLSLDFKRKVAAFFKYAEYDEHMCQSYDECLKYLKDDVQHRLFQDHDVLYAAEALEREYYVS
KZM25386.1	>ST47_g3487	MRRLDISVSGTVLASLLTLAPLPAAAFYFPGTAPTSYKVGDAVPLFVNHLTPADSQNDPKLRSVFSFDYYHEPFHFCQPKDGPKYIKESLGSILFGDRIQDSPFELKMGVNETCKALCGPQEYDSRDAVFVNSKIKQGYDLNWLIDGLPAAQLLKDPNSDLPFYSPGFALGLVDGENPIFNNHYDIVIDYHEAGPDNYRVVGVLVDPYSMKDPKQSECQSAQTPVILNEDKGDKVDFTYSVYWRLSPTPFATRWDKYLHVYDPRIHWFSLINSAVIVVFLVGMVSTILVRTLRKDIARYNRLDQFALDDFGDNGDVEDGVAEDSGWKLVHGDVFRPPKSPLFLSVLLGNGAQLFAMTALTIAFALLGFLSPSNRGALGTVIIIFYTLFGFIGGYVSSRI…
KZM25404.1	>ST47_g3551	MAKLSLLLAVSQFSLVYSLPANDINRQPEIPDERAITISTNLDATTSYSTAIESLQTATLTTRPSLTGSILTALPTGGGITKDPANLPGITATFEPLCPEETPLVPGPTSPAGLPSADIFVPLATGVPAPSIPFRNDHVVQKQNIVDGNVPIQTNKFYANFFLGSQQSPVWTHPYSLSWAKGRGGSYGMAISHTERSQFAFGPDTNNPQYFISPIGIQQMALSAAELQAGTAMTIENLKAFSVYANFAPSAGSRVVMSVPVVQGMGFITSVYDNCQPMISSGVFFRSLKYAGQVNSVTFKYNTQLEDGSQWLIYVTPLAADGVPPLTLVGGGSIRGPDSFTGLIQVTKNPSGQDGERTFDGSAGSYAINATISGAVNGPSGSYTLSWTKGGVLSQPLVM…
KZM25405.1	>ST47_g3550	MKFHGSYSSMLAPFLLLASAPLGVLAGDVLKTNGYSSCLTGNSDIKVNKLDIEFDRSTKKVKFDVSGTNAKEQKVMATLQVNAYGRSVYSKTFNPCDTDTKVDQLCPVPAGTFGATGEQSIPESYISQIPTIAFNIPDIDSQAKLELKSIDSNEELACITSQVSNGKSLSTTGVQYVAAGIAGAALAVGGLSALASAGQAGVAHSSPTFGDVVFWFQGMAMNGMMSADIPGVYRSWSKNFAFSTGLIYWEGMQSSIDGFREKTGGNLTTDSVKFLSNATLVHVDQNMTVSKRSFDGISDVLLWARDDLSTNINGTEEATGDSKVVHAVKGIQGYVEEYKIPNGNTFMTVLLWFAIVVAAITVGILLLKVILETWALFGTFPKRLTSFRKRYWWILAKTI…
KZM25444.1	>ST47_g3421	MFLNSRSLLNLALMTALVLEASAVDLQPWGPEDYQDAGLGQATRRDSTLLKSGPIGSQDDLPTSMVVKRAPFPVELGAISDPSVLTRGRSEKRETPGNGCFDPEKHSTFFWGGYAGDNIYVANFTMSAATDDEFILPVENFAKRMKSISCGAPGKPIVLEFSDADSLSYAKSAWKWVDDADVNHFVLVTEPDMCYKGDNRSPYLVSAIKFDDAKLSAEITAEEKPWDEVAQHFKLSLGHEYVDPATANVTHPHLARREDDGKAMDISHTFSGNLFNYAKDSKETAGMSLSADLELTTEGAIIADFDVEKNFIGFPTDAKLNIHPQGVNALMKLSLNADGKLGKELQWDMKPEIEIPIQAIKIAGILEIGPFITMGIHFGSSALEGTGTMSVGAKAKIKD…
KZM25445.1	>ST47_g3420	MRSSAVIALFAGSAAAQSTAVLLNPLLPASTFTVLGSSSGTTTYVNSCPESAGIPASFLSTATAGKYQSKVDTLEAQLTLSKASASAAASSSVIRSAGTHVLTPISAPSTTAAARLRRQDNFLQICEPMTLKQGSSSMEIQLEDPINGAWTANANCAWKGELTSADLTCTATQSGAFAKILEAEGVTTVILKASEVADASVLHTVSVVQPASNSASATPSGSQSASVNATASGSSAPNQATGAAAGAPLSRSVMAFVGGAAGIFAAALAL
KZM25457.1	>ST47_g3409	MSRSAMLSRCLTGLLTLQSVLGNPVPSGYPTPPVIKHGELGAVASESDVCSHIGVKLLKQGGNAADAMVGTVACVGVIGMYHSGLGGGGFMLVRAPNGTYEFIDFRETAPAATFEDMYKDNEDASINGGLASGVPGEVRGLQHLHEKYGKLPWATVLKPAVKVAREGWRVNEDLVSYIKSATASMNATTNFLLNDPEWAIDFAPKGRIVQLNETITRKRYADTLETIANQGPDAFYEGPLAEFTINALRAKNGTMTLEDLKNYTVAIRKPSTITYHDYKLTACSAPSGGEVALSALKIVEGYSGFGDPAAINLTTHRLDEAMKFAYGMRAELGDPLFLEGIDEYQEKMISASTAAEVRSKISDTQTFNVSYYDPKGLESLETPGTSHIVAADKDGLAIT…
KZM25465.1	>ST47_g3389	MTMFCTDSQSRWRTALVGGLLATLSLLPGSAAQAKTQADYFIHELPGAPQPQLKMHAGHIEVDAAHNGNLFFWHYQNRHIANRQRTVLWLNGGPGCSSMDGAMMEIGPYRVTEDGNLKYNNGSWDEFANLLFVDQPVGTGFSYVNTDSYLTELEQMAEHMVIFLEKWFALFPEYEHDDFYIAGESYAGQHIPHIARAILKRNKNQGNRAWSLKGLLIGNGWISPVDQYLAYLPFAYQNGLIEADSESARRVEQQQSVCVEALNNGGKDRVDTPVCEQIMVTILEETKDKSADPMEQCVNMYDIRLRDDSSCGMNWPPDLKQVTPYLRRQDVINALHINPDKKTGWQECNGAVTGHFRAKNSEPAIRLLPDLLAEVPITLFSGDKDMICNHVGTEAMIDK…
KZM25476.1	>ST47_g3382	MKFSILLPFLAYASSVSGAITWTLSKSASPSADESDAYAKIEAAMRLAVARYGRYSSASKTIRVAYAPGVPTAEANFNGDLRFGSNRAYMNERTAMHEISHTLGIGQTSAFDTKCAAGDWRTALPLLRSWDGASAVINCGGGHIWPYGLNYDTEWSETNADRHVQLIDAMIKDGLQG
KZM25480.1	>ST47_g3370	MSVTVYAVVAIVLILVLQQLGRIGGRPVDYPPGPPTLPLIGNLHLMPKKKGHLQFQRWAEEYGPIYSLVLGTKVLIVLSSDQVIKDLLEKRSSIYSSRPELYLGNVISGSLRIALMEYGETWRLLRKIIHNSLNIKVARTYVPYQDLESKTMLMGFLEKPDLFSHHIRRYTNSLTAQMILGFRTTSINDPKLIQLYSGFEKFSEVAGSQTAALLDVFPLLRSLPDWALPLRQHANKLHEKENELFMGHWLNVKKAIKNGSAMPCFCVDLLRAQDENHFSDSLAAYTSGSLLEAGSDTTAAILIGFIQALLLFPEVVNIAQEELDRVCGDRFPTLEDAQDLPYIRGCVKESMRWMPTDILGVPHAVTRDDEYMGYKIPKGAGVMLNVWAVHMDPKRHPDP…
KZM25502.1	>ST47_g3332	MKLNVLIPVAFLELGALALPGSLDTRAAPTIYTAGDSTMAAKGANNGLTDGWGQYLSKYVSVPVVNKAMGGRSARSYTHEGRFTAIANLVKAGDIVVIEFGHNDGGTPSSASDNKRSDCPGTGETTCKSGLDGSTVYTFDHYVKAAAKTFIAKGAKVVFSSQTPNNLWEGGVYSVTAPRFVSYAAQAAKEVGVGASFVDHFQAVANMYKKLGSSATNALYPKDHTHTSPKGADLSAQAFAQAIKLALNGTTPLSPYLNAHNPTVW
KZM25504.1	>ST47_g3338	MLKLSTLSLACAALTTAQSSVPSFTASVAPAAETVTTVSTPANVPLFDAEIVQLTDNVVAGLQNNPTVAEHASLFAFGDTNPTAAARARRARRAPRCKTMPGDALYPNKFVWGLANQLLGGALEPIVPIGSPCYQDSEYNNYDAERCSYLVKNFDAEEIYYEDNGALMNPLYYGMTCPIPASGNAANGTCTQGGYSEYAVKINNVAQIQLAVNFARSLNLRLVIRNTGHDYNGRSVGKGALSVWTHGLKGIRYIKDYESSAYSGPVFKVGAGVQGFELLQAAEQYGVSAVTGICPTVGVFGGYSTGGGHSPLMQLFGTGADQIIALEVVLSSGRFVTATPLVHSDLYWAMLGGGGGTFGIITSAVVKVHPKVPVTASTWTVMTSETVSAEAFWELFRFF…
KZM25517.1	>ST47_g3344	MFLRSALLSLAALAAAKEMPKDEFRAAELFDSGIRHENNKALKLETWAAQEAAGVYASAQYAELASIANCANGTAKTSTDTFKCKNIDLYHFLSHSALGSTYGFGSSSWGWTSSTGREFVAIGQSDGTAFAEITKEGKLSYLGRLPQYSTRSQWREIRGQNDYMIIGSEAVDHGIQIFDMKKLLTLSPSSPKTFSNTADLAGHYKGLPTGRTHNVVTNPETNFIYSVGAMPRTDKCKSGIIFIDISDVKNPTSPGCASADGYVHDAQCLIYHGPDKAYEGKEICYGFNEDTLTIYDITNKKAPVVLSVTSYTGAAYTHQGVVLDPKNQKYLLLDDEYDEYDKVGPGAPGNPITYIWDISSLKAPKQTGYYKSGAKGIDHNQYVANGFAYQSNYGTGFRV…
KZM25521.1	>ST47_g3340	MAIKILPLLPWQTTVLATARDSAESAKAVHEVALVLFVLGFDKQANVLLTTVYDHSNGLAFDLNTNTAMLYYAWEAFNCLPSWIQRSDPEKPFRSRDHLVRDEPLWNYFKDKWADGLPEGLLQKALDNGHVKDAELQVLIKESEDQDHDIMTEIAGSIGAVVQATSLAGETEAARSIAETDVANLYRHFQDPTNQPDVYKDEMRAWIKNDLAFAMRRIFGKGPARNYADLSIIDLVHLLDEAKKPQSVLNLDEEDVEHHMQKSATEEEIIELESRLGRQPRLSDYQNAQGFATQIEPYATPLLPEGSLPQDYKDFLRVTNGFYLSSPDDPGSLFYGTEAIDASDDQLWTHDLDFSLFPSNMTTFSGDEIEMGEFTGFSVGAGGDEGQALLIPRSSIEPM…
KZM25527.1	>ST47_g3300	MRLLDIFTLLSAVTLAAAGGHHLPKRNYATHDYYAIHISPSTSPSDLAAHLGLTLEGPFGSLDDHYVFRAPKHDNDVVDDARQELKRRRRKREAGPEYHPLDSIRFTQKQKLKARHWKRSVIPPRANVNDAINSQREVAKSLSIQDPIFAEQWHLFNVKTPGNDINVTDVWMQGITGKDVTACVVDDGLDYDSGDLKDNFFAEGSHDFNDHEDLPTPKLSDDRHGTRCAGEIAAGKNNVCGVGLAYDAKVSGVRILSGQITDLDEALAINYEMQKNDIYSCSWGPPDDGKTMQAPGILIEKAMVTAVQQGRGGKGSIYVFAAGNGAASDDNCNFDGYTNSIYSITVGAIDMNNKHPYYSEACSAQLVVTYSSGGGDAIHTTDVGANTCTSQHGGTSAAG…
KZM25536.1	>ST47_g3276	MSRSWASSLFVALTFVSAITCTPTTPGSRRQSSNDIVTGVDSRDQNGNPFLRLEVRDLQANHPDQWNLYLLGLDQLHITNQEDPYSYYSLAGIHGKPYKVWLDAPGLSHKIGTSGYCPHSMALFLGWHRPYLALFEQKLHMRMRELAENAPADQIDRYRWAAYSFRMPYWDWAQGEQSGNVPEFFMTPTTVVTTPEGRSIEIWNPLYKYEFKPVPSAGAFGGKWPQINHTIRWPASNSPWEESRDSEFAASFINLRRSIQDQAAIAFRRGTLNGFWEALEMVHGWVHGVIGGGYSSGYGGEGHMWPLEYSSYEPLFWLHHTNVDRMFALYQVQNPGAFLLPSNVHSSGNLFVEDNTVVDGNTPLLPFRRSPGSFWTTNEAMDWRVFGYDYPETQSADTA…
KZM25579.1	>ST47_g3318	MKLSWGFAASALYCAAAASKTGHVFTFDGFDGTDHHAAPASSPVDPETARLILAQRLGLSRFHSIHGADAEAIRNINAFGGRQQKLFGEQADASRAKLLVWLEDAEDSLVTKLRDASTASFEISSPPSATDNDRLIDDFTTQAESLPKHADPKAKTYSASIDADAAFSTLKKTTLHNDYLTLFRADKKDDVDRVVLQDALPGLAARGLDVTVVAMPSSSGNSKRHVKPYGTYKMPSVIQARRDRQNPEALLSLTSEPSTSPKADYPDLEDFPVFTSSKKSNGTVRGILPPFFNSLASCERTTLNCSGHGDCKLLHKAQDKTQQDRYGCACSPTVIGKGEGRKVTTWAGPACQKKDISVPFWLFVGTGVMLAFLISTIIGMMYSIGSEELPSVIGAGVSG…
KZM25583.1	>ST47_g3313	MLCNASLLLASALALGAFAAPIPADCPDSHNENTSTAPASNNKAIAGSVTAAQLTQIAPETASCSGAPFPDECVDAATAATALNKSFDTYGIKTAGEKAALIAYTLFESGNYKYSKNHFPGRPGQGTRMMAMPPFISKYATAVAGADAVATANAAGGDAGAVAVLALVNSDDEKSFGSAAWFYSTQCSADVKAGVVAETVEGWHNFLTTCVGTTLDEARDTPWVSAKAAILA
KZM25608.1	>ST47_g3256	MKVQVVFPFAALLGAALAAPAPVAQEVGVSFPITDVIDTGLTIKEYAEQLEAGVQPEKVALTKRQYGADTYNQLTDGTPCRAVTVIWARGTTQTGNVGSADSEGPTFFNALANRLGGTSRLAIQGVAYPADILGFLAGGDANGATTMFNLINTAISKCPSTKIVVTGYSQGAQLVHTATQRLTAAAAARVSAVVTFGDADRDETFGSVATSKVLIICHQGDNICENGIIITSEHRNYELDAPTAAEFVAGKV
KZM25610.1	>ST47_g3254	MVAFSRITFALAVAGLSSAQSFSGPFDFPSGAARPTSGRGGHEGGHGGDFGGFPRPTGDFHSKGPRPSGTGFFGAQQAQQSGEASFPTGGDFPAFPSGVAKPTGHHGHHGKGGKGGPAPTTDPSPASDLERRQQPFGTPPAFSGSFPAESGFPYPSGGFPSGGFPESAAPLPTGGDFPAESGFPYPSGGFPSGGFPESGAPFPTGGDFPAFPSGAAKPSGHHGHHGKGGSPSGPTPTAAPSPASDLERRQQPFGTPPAFSGSFPYPSGGFPSGGFPESGAPFPTGGDFPAFPSGAAKPSGHHGHHGKGGKGCNHSGQPAPTGFFTSTIRGA
KZM25618.1	>ST47_g3278	MKFLTILTTMFAALATASPTFTTTTAASEASIAAEGVAPIDVPICAFDPVKGEYVCPDSTTNMSIESAGNETSTTSKDSTSAAAAAAVEAADWDDCMKVSLSDCILSQV
KZM25622.1	>ST47_g3324	MRPTTILTVSAITASAVASTTYPNVHAVVDLNARAMDPATMDPTKLSVLSVLKTVMPTATGTDVVLPTGGATPQWYKDLPADVMVLLVQMYPVAQVAAVSGTSSIAANASSSLAQETLAASQTTRTRSLELVSTATGNATSLSTGSSNNVAANGTLPTGAPSPSKSTFSTGAKNTVRLESWSFVLALGVTACFFALA
KZM25661.1	>ST47_g3181	MQSYRGTLLTSGLLALASHASAQVANVCPSTNVCFKLNIPESTASSGSGDIFFQVSAPSTYSWVALGQGRAMAGSNVFVVYTSADGSNVTLSPRSSSGYNMPTLNSNTKVELLEGSGVSNGIMTANVKCSNCDSWSGGTADFKASSGNWIYAYQSSGGALNSNDQSISIRQHNQQDSFSWDYANAKGGSSVNPLVNASPAAPASNGSGSKSEGATATSCIARQAQASGSGTGSGTGTGSGTGTAITAHPAQTSSSDDDNDNNDSRTRWGPPTWATARPTAWPTGRPPNNDDNGGGPNRFTKRQDLPYCDDVSSVTGGFTSTALGGGRESSKRQTMLIAHGVLASLAFVILFPAGAIAIRLASFPGVIWLHAAFQIFAYLVYIAAFGLGVHIAAEMEMMD…
KZM25676.1	>ST47_g3218	MRLHPLSTLHLSLHLYLHLPYVLSQSTNTTSLTAPALVTNNNRTVIQCWRLRIPFQTSSTPGVVGAKAATVANVTNMAYTVLPPRFDGGLHRAPAPQIVHFVSGLAHITLPDDPDRDLWLVGGVGGLLLAVDTTGTGHITRYPSDQHTVGLLAPFEGGRVPEYEVVKNGGCEGVQTFP
KZM25680.1	>ST47_g3156	MRFTTFVAAAAFSSAVFALSAKRDPQDDVASILEALRENNPEDAEAAAAVMNVKLRARAPAPQDDLDSILAALDANNPDDAAAARQGTKPTASKREPQDDVASILAALAENNPEDAEAAKGAIQKRQDDVASILAELAKNNPEDAKAAQSLAKRWIA
KZM25686.1	>ST47_g3174	MPRSAIASSIFLSISLAFSADVALSYDTNSLKWAPCDLDFSSEIQLEVAAHAEPLFCATLPVPLDYTNRKNGQFLDLQLIKIKATKEPFKGSVLTNPGGPGGSGVDWIATDGPSIRNDLGGHHDVIGFDPRGTGRTIPFYCIQSNSTSPNNKRAEYNFTIPQDDMYSVLKAKAWRDGGKYAEDCASTPGNSDIAPYISTPFVARDMLKIIDALGEDKLQYWGISYGTVLGQTFAGMFPDRVKRIVLDSTVRFDDYHAGHWITVTRDTERALVNFFTECVNVGSELCPIANFTGPNATPEDLHNEYAKVFQELLDDPVFMPDDYHPLPWWQPGSITISQILKYSTLASAYRPRQFGELDIIVDIALRRAWDEWIALSTPLPSNSTTPEVPWNLGSNAFHG…
KZM25693.1	>ST47_g3169	MKSILWTSIFLAAASALPTTLYGRQSNETAPAVPDSITRIRLNPAKVRDSGDTDFTTWTVIEGPSSKFITNDTGLSFALSASSGKLNGNWNKAVYTRIIASLGERVIGEGISTIADNGDNVGGVAIKLSISGLSAGEHSILAWHNAWDALKTAASLTVTVNGKEAAKGIKQSIRTDNIWEAASSYTTFTVNQSEAVEIVYTPDTAGDGRAFLNGFEIDSPSLENQISFPTPVHRDERVVPVENSTDLSASWKAAKTVGALYNVYLGTSPTELKSVATGLSEPSTMLDDISTQETYYWRVDVVSGNSIYAGRIFTFRAAQLAFPGAEGYGRFARGGRGGNVLHVTSLEDSLDEGTLRNALTVAKGPRTIVFDVGGVITTKSRISVSGQYITLAGQTAPGK…
KZM25716.1	>ST47_g3130	MRAIAVLLAVIAPLTAALKFDLHPVSAHDAAKYERCVRNFVAKEQLVVVTAILDGYRGDGQKVDMHIRDAMGNDYHRPKDVVGENRYAFTSHADSAFDVCFENVLTGAQKSTGPRHVELDIDIGADAKDWSAIQAGEKLKPVELELRRIEEVVGEIVTEMDYLRVREQKLRDTNESTNERVKWFAFGTMGMLVGLGAWQVVYLRAYFRSKHLI
KZM25722.1	>ST47_g3138	MSRTTILAALTFGLSAVTLAADPYPNYEYGNMFYLGPTTNGQYITKATYSLSVPAPPTDYLTTKEDQRWLALWIGLQNNPNAGDVLNMDFVQPLVNWGPNNEVWGCPADNKHWCATASTYTPTGQIGEDYVPIPSNTSLDFVVEINSSTGMIDQSISMGGSVISKASNAKGMKPAVFYSGTECYADGCGTLDAHSWDNITLVLNEADAGLDKTLALTGATSSGMKSVDGGKTWTVEKIVIEKQNLTE
KZM25727.1	>ST47_g3109	MLSFGKLAGVAALFLPAVLACNGHTGGVPTATSTKTNSKVITVAAGQTFDCGWARYDRGSGACNAQVEGGDADAVFLLKKGATLKNCIIGKNQAEGVHCDGACTLEFVWFEDVCEDAITVKNDASGDQSWIVGGGAYKAGDKVVQHNGCGTVNIINFFVNDYGKLYRSCGNCSKQCKRNVYIEGVTAVNGGELAGINSNYKDTATIKNACYDTKTPCQMYNGCAGGCEPTKSGTCSG
KZM25728.1	>ST47_g3106	MQLALFLSLLPAVALAIPAPVLQPRVGSPIPGRYIVKLRNQNLQALIEGALKLLKTDPAHVYSFGNFGGFAAEMSDDIVQLLRIFPGVEYIEQDAVVKANLGEIEHLEKKAYVTQASSTWGLARISHKARGATSYTYDSTAGANTCVYVIDTGISTTHPEFEGRATFLANYAGDGSNTDGNGHGTHCAGTVGSKTYGVAKKAKLFAVKVLDASGSGTNSGVIAGINFVTNDSKTRAGCTAGVIGSMSLGGTKSTVVNSAVANAVSAGVFMAVAAGNEAQNTADVSPASEPTAFTVGASDSSDRFASFSNYGTFVDIIAPGVSILSTWLNGGTNTISGTSMATPHVAGLAAYILGFEGKKTPAALASRLQTLATKNVITGLPSGTKNYLAFNGNPSG
KZM25734.1	>ST47_g3126	MLFTIFAPALLLSTVASALPEVKRAVTLPLSTKGRDIVDANGDVFYFASTNWPGHQEVMVPEGLQHASVKDIVSWFPKFGLNSVRLTFAIEMVDDYVNKSPNQTLEKSFINSLGEANGTVVLNQILEKNPEFTKETTRLEVWDAVAKELSSQGVIIHLDNHVSKAFWCCSDNDGNGWFGEKFFDVENWKRGLAFMATHAKENWPTFSSIGLRNELRSATNSEPVDWYIWYIHMTSAAKAVHEADPNALIFFSGLSYDTYIDPIPLGKTLNGTAGKSTANKTAVFKPDDFAFKDKIVLEIHKYDFEATQDDCETFKSKWYKKGFQSVNPNDPSTKYLFPVVISEWGFPHNGTYWNQTTYAKCLVEMVEEYKVSWMHWDISGSFYLQTRPGRKPQESIQGL…
KZM25737.1	>ST47_g3121	MAPSFSRVSSGALLLALAYNAQPVKADFWEDVDNCELVLNDLPSDITTDFCHDWTYGHEPEDEYVTVTGYPVTVTEYPEAKTCDDEGYTTTTKDGYQTTTKDGYQTTTKDGYPTSTQYPSYEMSKGYESTNTTSEGSKTTEVPDESTEVPDESTKVPDESTEVPDESTQVPDEMTKAPDQPTDVPEGGWDATVTSTVYTTYWTTSTVYPDAYPTPAPYRRHARQLNTRQLDDRAAWCVDRPCRLVPYDDGTIVEACKKYLGLIPETKTVDVPGYTITVNSYPTDCKKNDDGYKPDPVPAYPTEDDNSYESDPYPTETPEYDPYPTETPEYDPYPTETAEYDPYPTETPEYDPYPTEEPEYDPYPAEEPEYDPYPAEEPEYDPYPTEEPEYDPYPTEEPA…
KZM25738.1	>ST47_g3122	MYSSWSQICYILLAPSLVSGSIDRQKIVSQFNIVRKKLIDNDTTPLQVGNGNFAFNVDNTGLQTFLPFNTLSSWAWHNDSLPANGELPSDYKGLPRDTYGREVFYDIPDPKLKQATQWLISNPNRINLGRIGFRYKGATLNESEITKPVQELDLWGGVITSAFEVAGMSVKVVTQGDFDSDAIAVSIESDLVRSGDLQVELDFPFPPIHSTKYKYEVFAGVYDFPLNHTTVLVGDGTNRTSAHIRHTLQETSYFVNLRWPKKTPLRLSRIEPPNSTAITAPRYTLDSTSNSSSIAFTALFSPDSRVPSFPAKIQDKSTREWNAYWKTGGFIDLTASTNPNATELQRRIIQSQYHVRINSAGSGQPPQESGLMNNGWYGKFHMEMVVWHLAHWSTWGRQQ…
KZM25752.1	>ST47_g3055	MKLTLLSLAIISSVLAAPAPAADPEAFPIAELLTSDLSFEDHALTKRQYSSSSYNQLTDGTACRAISVIYARGTSQQGNVGDAAAVGPLFFNQIASKVGGTSRLAIQGVTYPASVSGFLQGGDAAGSTTMTNLISTTATRCPSTKIVLAGYSQGAQLVHNAAARTSATNAARVAAVVVFGDPKRGQSFGSIAASKIRTICHTGDDICEGGTSITAAHLNYQNDAGTAATFVAGKVA
KZM25757.1	>ST47_g3038	MSLPLSLFLGGCVVAIPVVTGIAEGVEYQKKQNEEAANETRMIKFNLLVNCDSKDPIAKDEVDYGTVILRHDKAWVVPRDDDGKPLPPDDSKEMNPPMHAFAGFYIQYPDDSRCPPERGLVSTISDDPPMLNWVYCDKDTYELKYSNRSGSIEHIVGVWDWTQDERMMLFDGWEGFVAIDEWDGADEDNSTPWGREGLRWALYFDLEDNGLKGRRKDRDMFEVALERKIQSAEDQLKQLEEAEKKMQVKSRGGLSTQFSAPARERTKEWENKFGEGARRESAS
KZM25772.1	>ST47_g3073	MRSTLLAAGLLLGSAQALTTEGVLAAPRRSTGSLSPKGDRALFSSTSYNWTTAKATTGWYFLDVESGKTNKAPFGSEVSEVVWIGETEDSILYLNSSNEEVPGGVTLYTADLSGEFNPSLVASLNAPFSGLKAAKSADGSIHFVANTLAYWGNGSAYNPELATTPKSAGQLYDANFVRHWNYYITEQRYAVFSGSLTKGNGSYSFDGEIKNLLKGVNSTVTHPESPVQGSSSDPGDYEISPDGSKVAFRSKSPDLPKANYTASYIYVVPHDGSEVAVAINGPGTTAPETAQGASGYPVWSHDSKKLAYGQQDGIDYESDRFKLYVADIDGLNSKVHAVAEDWDSSPSGLKWSPDDADLWVVSELHAANRLWLVPHDAPADFKPVNFTGPDTVLSDFDIH…
KZM25782.1	>ST47_g3054	MQLKTLLLSLLASSAAAKRSCGTPNATEEQIQIAQNLQILESEAGFGETSLAAAATISIKVYWHVTATDKTVAGGYLTQAALDGQLDVLNTAYAPHGISFSQAGVDWTVNANYANDKAELAMKKALRKGTYADLNVYFTPGTQYLGYAYFPQAVTSGSNAFYQDGVVIRSSTVPGGSETDYNLGHTATHEIGHWLGLYHTFQGGCTGSGDYVSDTPAEASESYGCAKTRDSCPSQAGLDPVTNFMDYSDDSCFTGFTAGQETRIYSYWNSYRAGK
KZM25795.1	>ST47_g3103	MVGRRVISSFALVANAINVQAQGNTAKPTSGNYTVPVHNPTFDYIVVGGGASGLVVSERFAETGKSVLVLERGGPSLFSSGGDLLTPWNETLTVYDVPGLFYALMTWPGNDGYCKDVPETALAGCILGGGTVENAMQFVRPPSFDFDDKWPVGWKWADVEAAARSLYERNPGSTSPSTDGNIMTKLYKKYKVYSHPALNIQEGFRAGPVGTYLPLANVLPKFKLQLHTKVVRAVRTRSTVTGVEVEDAVGQRSIINVSPGGKLKLAAGAMSSPRILFNSGIGPSDQISIVESGSTRVTLPPKSEWGESPVGFVRDHTILILSFNVPGGTSILNQTELRSPSEEILDLYAHGSGPLAQSWNRLTSYTTVTNDDGHTTFVQIDTVALANNTVTFLVAITHN…
KZM25797.1	>ST47_g3101	MYKLAALSLLALASAAPSPQRNRGGGGGGQKQTAQQKAAQMPMGITQAQDGSMILDDMVMVNGLPIRFKIAAPADQFLPASGVPGAAATSGNGTMGANVLLHGDGGQSFFDMPNQNVQANTMGVALLAPDPNLFWGGGSGLQRTNGVAHAQAVNDWIQNEMPQRVAVNMSAMVFTGVSGGSLLMSGFFIPAQMQNYAPSAVELNCGGMPPQVAVQNAAAVASTRVHFQSTQSELQLLQGSIPQAVSAYEQLATDQGMTPAQINALQTVDNTPQGGHCAFDGQGFVSGVQTMLTSYSNVVQGGNGVVTGIGAPSTGKVTTGVVGNEKLQFTGGRKRESESMVVARWAQDVVVEEDVALLSCDRTSC
KZM25803.1	>ST47_g3026	MRASTLAFALFQGANAFNAAKLRDFNLLADMGLNADGSAMDEVSANSFIKRLRVGTLKNAATDLTVRQAAPETISAEYVSLKLDHFGKSKDTYNNRFWVAESGYKAGGPVFIYDVGETDASKSWQFWLQNETSFFKQIVDQFGGIGVVWEHRFYGNSTPAPINLDTPAETFKYLTTEQSLADVDQFAKQFKRKNINATLTPDKTPWIFIGGSYPAMRAAFLRDKYPDTIYAGYASSAPVQSSLDQSFYFEPIYRGMNKYGFGNCTQDIKAAIKYIDHTFDTDRSAAAKLKEQFFGKGAASNSHATFADALTTIFYLWQSYGVDGGTGSLRSFCDYIETDPKTNTTAPAEGWAKSKGAKSVVDRWASWEIFTLVVNSYLETECSGKQNVTGTCDLNKRFT…
KZM25805.1	>ST47_g3064	MFGRLRVILLSASALCQLSGAAPADPTITTAAVLPRQNSDNFIGYLELNSTWNSFDCDPGLTWFQSGQYAQCCPATRPSCYAATACFGGSQIYTYPDRSSVRTIACTANYGNAKVSICNTIYIYENTQDSNPKTNINCGDSSVNWSYYRDIPASATGIVNTSPLTSILQLPSTANIGPTSPAEVTSGSKAWIAGAVAGPVLGLALVGLGVCFFLRRKKKAAIAPQYGTASMAPIDPSQPPAGVGGYTDAKPQFASSHPGYYSQPGQPDHYAQQWSPQQGGYSTSPQFGFQSATSPPLGGHTHDARYEIAKGAAELGGDISGSAAVAELSSGDVKTRDEGSSGGIGLSTEGHSKHQ
KZM25810.1	>ST47_g3062	MVQLSLLASALALVSAASAQCGSGTPAAKVTGSGSSFTATRGSTNVYTGSDYRAAIQTAVDSISSGQRVSVIASGSIGANTITITAGKIFEGCGTINAVSRSGRGAIEVTDANDVQIPYLTMTGSPYFGLRFSGANGLTLGKITMNLSGGLGIRFDRDRAAQSNVQMDDIRVTGAGSHAVETWNIDGLTINQVIARNVGESGLLLQNSVNIKVGLVDGNNVGAGSGYGTLRFANRNGRNANGNYNTNVQIDKVVSRGGGRGVFCVSESGGAVITTVDLASNGNNAVLIENCYNVSIRGGTVNGGGEVRLAARSEFANNRDIWITLKVDGTTVRESPCGDNTNWTLSGNGARDVC
KZM25813.1	>ST47_g3049	MELSPRRIVSIVLSACLVVPTTAIESFRRPTVNFAASNESYLLATSSQPASIHIDAADWPGVLRAAHDLAIDFGRVTNANATLTATGSPTANASTIFNVTGISDDWSAGTSGNSTGGTAIIVGTVGNSSLIDALISSGKLDISEIEGQWEAYVSALVRNPMNGTDQALVIAGSDRRGAIYGIYDVSEQIGVSPWHWFADVPPKSHAEVYALDVTKVQKTPTVKYRGFFINDEAPALTGWANNKYPVYGGNSPFGAEFYAHVFELLLRSRANYLWPAMWNGMFNVDDPRNQPLADEYGIVMGTSHTEPMVRATSEWSKVAKGSESGWQWATNNATLYDYFYEGAQRAAPFENVVTVGMRGYHDTAMSSDVQTSVLEAVVDAQQDILNKIYGNASEVPQMW…
KZM25829.1	>ST47_g3084	MKARSIFCLGIVTGTGFAQDVFEPSDFNVTDALIANGVDVSALPELANLTEKRSLSNPCAVACNSLKLIFGSKILTSGSADYDAFTSAYWSTQTASVEPYCVFKPDKALDVSTVVLLSRLTQCPFAIKGGGHTGFPGASSIEGGITVSLENMNEITLSSDKKTAAIGPGNRWGAVYTKLAEQGLTVIGGRASDVGLGLVLGGGVSHHSNIYGFACDNVAFFEVVTASGIILTVTPTQFPDLYWALRGGGNNFGVVTKFNLETVPQGLMWGGTRIHLQPDYPKLIDAFATMVESAPSDPKAVQILSFAVTAGSPAAQIQLEYLQPVDESNPPTILKQYLSIPPVMASTLNRTLTSDTDMLSAQMPAGHRYSFWAGTFKLDRDFMTWMQERHQKDVGSLPD…
KZM25834.1	>ST47_g2924	MSIPRTKSAWLFFSITSGACAAFNGVFAKLTTTELTGAWSSSLATAFGLDPSNKFFEYALRAAFFGMNLLFNAIMWGLFTRALTLASSTVRVSVINTSANFMITAVLSALIFSETLPGLWWLGAAMLVAGSVIIGMREEGEKKEIVTGTGEAPLLNRDGEASADFRDSEDDAQSRHELDSVRRRSSSSERAQSSDEDGTLR
KZM25852.1	>ST47_g2865	MRFTTYATFLAGAASAAPTYNIARGTNLPAEPVYRRSDADAATSYQVGKRSDADAATVYQVGKRSDADAATAYQVGKRSDADAATAYQVGKRSDADAATAYQVGKRSDADAATAYQVGKRSDADAATAYQVGKRSDADAATAYQVGKRSDADAATAYQVGKRSDADAATAYQVGKRSDADAATAYQVGKRSDADAATAYQVGKRSDADAATVYQVGKRSDADAATAYQVSKRSDADAATAYQVGKRSDADAATAYQVGKN
KZM25868.1	>ST47_g3013	MVKLGALAFGLLTIVAQVSAQQTVKVMPFGASIVSRCWRANLQTKLRNDKVTNFDFVGSQTGSCAGASIDQDHEGHPGSLATDYAKNGNLTVWLNANPPDVILMLLGTNDVLIGKKSTGDVLKAYDVLIDQMRAKNPKMYLIFSNLLPLDPKRWPQSGADGIVNLNAAIKQYAPSKNTRASPVVFVDNFTGFDAVADTTDGEHPNDSGNEKMATKFFAATRDAIKAIAPDSPENPQALAPAQAQGQNETPPMVTSTARVTAQAQSNSPAAATSIVLMTAQTQAKGSATSVATTTATQGSQQTSSATSLRAAWPLNVWRGVSAVFRGSRQSVL
KZM25890.1	>ST47_g2966	MKGFTQLLPLFASLALASPIDLTKSGLHKLFIRQDIQTPINASLPNVTIFATGGTIASQGSSNTQTTGYSVGLGVQQLVDAVPELLNISNIAGYQISNVGSGSINETISLKLAHMINEELAKPEISGVVITHGTDTLEETAFFLESTVNSSKPVVCVGAMRPATALSADGPLNLYQAVVLAGSPAGRDRGTMIVLNDRIGSAFYTTKNNANSLDTFFSTEAGQLGTFVNQVPYFFFAPSEPVGRIVFDVSNVTDLAQVDILYAHQDMDPALFNASVASGAQGLVYAGVGAGGMSDKANLAAEELFNATSIPIVASHRSTDGMVPPSSPGDFIISSGFYNPQKARVLLQLAITQGWGNGEIAEAFAKSLPTP
KZM25902.1	>ST47_g2902	MLAPHLTSLFFVFPLLTNAAILFAAQSNGDLSTLSLSQHEDSYNLSVTSTTRECGGNPSWLNIDSAQRLLYCLDRGQSNATKGSLNLFRIGEKGLLSSIDRVDAPFSGVAAEYFDVGEGKRGYVTASYTKSAIAAFLFPKNGSLSPASQTIHPTHNITGPIASRQDDSYSHHVILDPTHPYILIPDLGADLIRVFTYTPGTVAPLTELEPLKTESGAGPRHGVFWQAPGESGAWYLLFNGELSQKVYSYRVTYSSSGLAWEPVSESAVLGELGETLPPNTAPTSEIAVSPDQRFVVISSREHSFPTSLLHKKKPSDSLATFSIQDDGSLRLVQIAPSGGHLPRQFSINKRGDKVAVGHQGNSTVVVLERDISSGEIGGKVADVNLRGPVVFVGWDE
KZM25908.1	>ST47_g2997	MRTTTVLTALLPAALSSVVPVTGEDPPALSFENRQDITLRSLEGKSLQADVYAGVASLSQKAYQASKQPTQRKTCNPQNIIVRREWSAFSTAEKKGYISAVQCMAELPPKFPKSLCTGCQNRFDDFVATHIRQTFSIHSTGNLLPWHRFLTYIYEKTLRDELNIPHGSGGGCIASGPMQNWSVNLGPVFTDLTCTPDNPIFDYADPTTAGQRWSNGEMVTKLLNSKDLKTFWYDMQGDENAFSNNFIVHTAGHFTVGDDPGSDFLTSPGDPYFYAHHAQIDRVW
KZM25917.1	>ST47_g2981	MKVASGFAGFSCIAAALLGSASAASYDDIPEIEVYGQHFFYTNNGSQFYLKGVAYQQNYSPNGSTSANTSYTDPLADGNACRRDIPYLKQIYTNILRVYAIDPTKNHDDCMAQLASADIYVVADLGEPGTSIMSDDPEWDVTLYQRYTGVIDALSKYKNVVGFFAGNENVSAANQTAAAAFVKAAVRDAKGYISSQGYRSTLGVGYATADVPTRDELAHYFACEPGNSGNSTQIDFWGYNVYSWCGDSSYSASSYGERVDFFSDYPVPVFFAEYGCIVGIDGGPTHRPFTEVQVLFGNMTSVFSGGIVYEWFMGTNDYGLVELTSNDASVSPYPDFTSLQSQLASISPTITMRSTYTPTNSAPACPTVGSSWQAEASPLPPSPNNQLCSCMAASLQCNI…
KZM25929.1	>ST47_g2877	MLRSLSVAADLGNLALSVLSLSQLALAQSSISLSPSSNAPDGASDYLDASFAGFGIEPSNLFSFTGGDTPNLLSVKLLQNLADYAGAPPHIRLGGNTQDYMLYDSDYKDIAWKKNPNSMAQGNVAADSMIIGPGYFEALNRFPKDTPVTYGLNLAYMEDDWEDRIVAAAQGAVSGMTNVKLYSFEVGNEPDLWLQNTFRTAPWNGQTYTTQFLDRAEAVYTRVLQPAGLPSSFFEPPATASTIGTTFEISQLVSDGMMEGRNGDNYVTVWNQHDYFYFIGVTPTPITLNDLMQFDQTNTQFAYWAKQVNIGLKTGLPYVLREMSSIGPIGMPGVSDAFGASLWTLNFFLYAASLDISSVQMHMTDNSNASAWQPIELYGRAPFVRTLYYAHAAMAQIVG…
KZM25931.1	>ST47_g2871	MFNYALAALLQLSMFLLVEAAPITVQSAKPWQAGTGGGIVGFIVLVLDIIAWIEIFKSNRPVSGKVIWALVVFLFPVVGMIIYYLFSNRQAHNTYEPISA
KZM25932.1	>ST47_g2870	MAFRKSSLFLLILHIISLALAEPVQYCRFGHRSNAVDFCMGVTMHHNHTSGAHDMYMSFAVTRSSHLGWTAICTGPSMKGALMFIMYGDPGSGVDPILSIRTVDGHNQPREITPHDMGGSDIRVLQSMWMPAESRDSPTSHTHSDGTAMYEARMAVVCYACTRWPGSPILASSSSQAWIWAWNDQQELPVYSFDANLQMHKHHAGNGGWGVFYMDLVRSVSDAVRRPSLPPLRLGISTLGTSDTPIGASGLLASLKANALVNAHGFFMGAAFMLLFPVGVVAIRSGSTKAFKYHWVIQVVAMCFVVVGVVTGLKISGNKITVPHQWIDLLPQDI
KZM25935.1	>ST47_g2879	MKFNALLLLSCTVQALAATVDDRRELVSSKKLQEKITTKKLMANLEALDSIAKANGGNRAFGLPGYAASVDYILSKTKPLKNLRTWVQDFPALFSRVESIKFSVDNTSYHVIGLTYSPSTTPEGLTLPLVLGASGPEGCTNESYNDLDVEGKIVLVQRGTCPDGTTLAGRVKPAVAAGAAAVIIYSDVTTNVTGGTLSAPNPEAYRSAGYINKVDGEALVTRLNAGDAIEAYFQQTQTVETRITQNVITETKGGDPNNVIMLGAHLDSVQAGAGINDDGSGTTLILEISRALEHFGVKNKVRLNFWGAEENGLVGSKYYTQNLNSTEADKILAYLNFDMVSRGYFGVFDGDGSSFNLSGAPGSAAIEKLFVDDFTKKGINVTAARFSGGSDYQSFMNIG…
KZM25939.1	>ST47_g3001	MVRKAVVASMAVGALASVSAFTPKLNAAGEELRLIKTSDADNGTWYTEQEKLDLFISTPSCAHFMDITETQELEEHRVAVANGFKVDKRQSASFPSAASHQTETNKLLAQISKTNPKTWATTLTNIHNRYYKGSYAASSATTVFNLVKNVAAANTKITVKQFTHSYNQPSVIATIPGSSANVVVVSGHFDSINQANPTTGRAPGADDNASAVVTILESLRVLAAANYAPKNTLEFHFYSGEEGGLLGARAVMQDYVKRSIKVLAVMNQDMTAYSPNHNIAVYTDYVSTPLSNFIIKLVPVYTALPVITDRCGYACSDHGAAYDAGYPAAYVCDENMVDATPYIHTANDALSTMDFEHLHQHVRLTLGFLVEGSYF
KZM25949.1	>ST47_g2959	MRCLLVLAAAVAVVTARAIEGVSSGFVSTSQSPSLPSSFKWSSSGALVGPRNDGRNVAGIKDPSIVFYKNAYHVFASTAQASGYNLVYFNFTDFSKANASTFYYLDQSAIGTGYRAAPEVFYFAPQKLWYLIYQNGNAAYSTNKDISNPAGWTAPKDFYTGTPQIITDNIGDGYWVDMWVICDASACHLFSSDDNGHLYRSQTAVGNFPNGMSEPVIALNDTRNALFEASNVYHVDGGKYLLLVEAIGSDGNRYFRSWTSENLAGPWAQLAATEANPFARQNNVVFSGTPWTKSISHGEVVRTNVDQTLTISPCKLRYLYQGLDPSAGGDYNSLPWRLGLLTQMNSAC
KZM25964.1	>ST47_g2897	MKSFCLLLTIAATVTALPQSLATVNKVPKIRVKPHRRANQIIPVVVGGPQDTFVPNSVVAAVGDIIQFQFSNGNHTVTQSTADTACTPMEAGVHSGHIPFQDGQTEVGTFNVPVTSTDAMFLYCATGPHCQEGQVMIVNPASAQQVADYAKLSQATEKSTDGGEPVGGSAGKIALDQAAFTPAPPEEAAAGGPPPAAAPPTETPAEAPAEAPAAGNATAPAETTAGMGGQPPAETSAAESAAAPAETPAAGEDQPAAGEHQPAAPATAAEGEATASASPTSFVFLA
KZM25965.1	>ST47_g2896	MASLIRSLVLLPALLSSIAHAVNPVEVRGQDFVDTVTNKRLMIVGVDYQPGGQAGYKPSAGQDALTDADVCLRDAVVMQKLGVNTIRVYNVDPTLDHSECMSIFNAAGIYMILDVNSPLSGESINRLQPWTSYHKDYLTRIFGVVENFKAFPNTLAFFAANEVMNDLKTAEDNPMYIRAVQRDLKNYIKNHSDRTIPVGYSAADVREILHDTWAYMQCSHDDDQSSSDFFGLNSYSWCGEANFQTSGYSDLVNMFQNSAIPVFYSEYGCNEVQPRIFTEVEALYGTQMTSLSGGLVYEYSQEEADYGLVVINSNGTLTLRQDFDNLQGQFNKLDLSLIQSTNASSTNIKPPECSMDLITAEEFSKNFTIPAVCPGCQDLITNGISNPKNGKLVDVSDTK…
KZM25969.1	>ST47_g2933	MWNTLALIALTAAFLTADAREISFPPLSGFTSDQAAMGILSPDITQAKFGGLTTYANLPYVHCLAQESEDAEKFDIAVLGAPFDTASCHFVSDMLLDRIGVDGVTARPGARFGSSGIRRGSQRIAPHTAWSIYTGQNIFTDWAKIVDCGDAPLTFLDNTVALKQLDKAHKVISARKTNSSDFTVPRIVTLGGDHTTTLSALRSTSGHWGPVSVIHFDSHIDTWDPEVLGGGISHYAGVNHGTFLHIAHEEGLIRNTSIHAGIRAPVIRPKGDVRNDVRCGFEMIRARDIDRLGVSGVIEALKKRVAGTKVYISVDIDVLDPAFAPATGTAEVGGWTTRELLSILDGLEGLELVGADVVEVAPIYDNPGETTVLAAAEVVLSLLTLMVNKPVQAEI
KZM25975.1	>ST47_g2977	MLSALFTSTLLFLSLLHLSAAVPEPRRPVAAAQLTVRQVSATPSQADLCLDYERTANMSTIAANGTYRTVLLQKSSTGTIYNARMMDAAIAKLPRLTADSILNTACGNWTEIALQEAEKNFTLGRVAQFSTEGLPVGIRAGPEVLGIVGAIVMLFSIVWISG
KZM25977.1	>ST47_g2971	MSSSRFFFVFALLAALALAAPSQVKRQGLAKRSFKVPRQLNTAHPTGPNGAAAMRKVFRKYNFKVEGDFVAYTRAAGINTTTAAVGGSNTTGTVAANPGPNAALFLSPVEVGGQTLNLDFDSGSSDLWMFSTELDAASIGQHSAFDASKSTSFKKTVGSQWKISYGDGSGAAGSVGTDTVTIGGVKVEGQTVELANKVSQSFIQDTDTDGLVGLAFSKLNTVNDGTKKTPQKTFFDNVMGNIDMPVFTADLNPDGTGVYEFGKIDATKFEGQMAWIPVKAETGFWQFPSTKFAVGDQVMQNPQGSDAIADTGTSLLLVDQPVADAYYSKVQGAQLNAQVGGYIFPCGAKLPDMSVAIGDTYMAKIPGNQITFATVDKANTTCFGGVQGNQGAGLQIYGD…
KZM25979.1	>ST47_g2973	MAGTQRYLRYIVFALFALVLLYFIGSSSSVPSAPSWPSYGSGSKDTLAPSTPSTPSTSESNDAASSPHASHAPAAAKPPTTPNGHELPPATMPGDRMNATFVTLARNQDVWEIAKSIRHVEDRFNRKFNYDWVFLNDDDFNDEFKKVTSALVSGKTKYGKIPKEHWSFPDFIDQDKAAKVREEMKEKKIIYGDSISYRHMCRYESGFFFRHPLMLDYEWYWRVEPSIEMHCDINYDTFKFMADNKKKYSFTLSLYEYVETIPTLWEATKNFTKTFPEHIAKDNSLKFVSDDNGETYNHCHFWSNFEIGNLNWLRSKAYIDYFESLDQAGGFFYERWGDAPVHSLAAALMLKKDEIHFFNDIAYYHVPFTHCPTGEQYRLDHKCHCNPKDNFDWNGYSCT…
KZM25990.1	>ST47_g2938	MRFFEIATVLAAAGAVQAAPMEKRAAAVDELVGFAAGTTGGGSGAGTTVSDCAGLTAAAKKGGVIKVKGTLTGCGIVKIVSNTSVLGVGANAGLTDGGFQVRKADNVIIRNLKFYRAPKGKDLVDIDASTRVWVDHNDFSSVGITGDKDTYDGLLDAKHGADSLTFSWNKFHDHWKGSLVGHSDNNAGEDSGKLRVTYHHNDFQKVNSRLPSVRFGTAHVYSSCYNGGISGVNSRMGAQVLVENTSFTGVERAIVTNLDSDEEGSANERNNLFTSSTTEITKKNTWTPSYKYTADAAASACSIVAKSAGVGVVTF
KZM25998.1	>ST47_g2848	MLVSISEGLCLEGLLGAILFSALADMSAAGERGRPGQWNTIVRSRLEHLYQHVLKGNKGYFNRLQSILRGDQKLWLLSISHNNAQWSSNLFSTVTNQPASPTAFEAAVVNKLQTFILFRASSETATAIRITMAQDFAGQVHYNRLPNKWLLDATDESITISESFRSITDIPTVHLHAEQPFQDCSDYELRIFAGPHFESISATSDATKVKTNKIIVKAASDDKAGSSDRDCDCKFHDLPWEDQGYQKAFAETCVAIATTTNKSRQQKRKLFDDFNPHVPLQVLGVSGDNGFVDYIAFVSLGLKSIRTHARSTKEIRITFVSAPTISNSTSFGITTKYLLCKHLHGVQSCLYPSSAPGSFRIDQLGAYKDCLVVVHGLYSTTERHFCTLSFIRADWLLYH…
KZM26014.1	>ST47_g2851	MKFSTIVSLGLTAITALAAPTPSMIDVKRGIEKRAASLEDVATVGYATTNGGTTGGKGGKTVKVASLSELTAAVKGDNAAIVLITGPIKGSGDNVKVGSNKSIIGQNSKVVLENFTITVKGVKNVILRNFAMQKVVGGDAIAIQKSKNVWVDHLDLSSDRDHDKDYYDGLLDITHAADFVTVTNTFLHDHWKASLIGHSDNNGGEDKGHLTVTYANNYLSNLNSRGPSFRFGTGHFYNNYYENVSDGINTRQGAQLLVQNNVFVNSKKSLYSTDAGYAVQSGNDFGSGKNTASKGTLTKVPYTVSGLLAASKVKAAVVGTAGNTLSF
KZM26038.1	>ST47_g2801	MQFLFRMLTFAVFALALPSAEKQDSSGSQQIGKGGALVTAGQCKIGQRYCFGAIVGDLNVTKQDILHQYCNQKYKNDWQSCNRCKRPWAMPECWDGPGAWASVFECKGPEVYKWVERCEGSGSICSGGTCRWTRAEGLAE
KZM26055.1	>ST47_g2835	MSSIIRNVLALSAVAAVAVAQDPAPKLDAPCADAVIFMARGNEAPYHDFRTFPFVEATCSKLRAEGKTCDYIEIVFPYGGDYCKQIGEGVRNGLSQITAFNKKCPCTHLILNGYSQGAWIAGDVLAGPGGCSQITTGLDPTSAPGNAIAAALLWGDVMHVANEPYNVLDGSDLQKDGRHADSLARLNRYAPVLRSYCAKGDPICANGDDVQKHLSYFELYSDDASTWAVGKLNDAAPLCAAPTPTPSASSTVVASSVGIAAVASSSAAASSSVAASSSVAASSSVAASTSVAASSSVAASSSVAASTSVAASTSVAASSSVAASSSVAASSSVAASSSVAASSSVAASSSVAASTSVAASTSVAASSIVAALPAYPTSPVYVASFTAPQPYEAMCVPRI…
KZM26062.1	>ST47_g2816	MQPHTLILLAAALRRASVLAAPVTVSADESAIVFTGKEMDKRQTGFRTAAYAHLYREAADAGLAEEKAEERSTAETEDAVLVDRDAEK
KZM26064.1	>ST47_g2814	MKYTSFLTVSALTTLASTSAVGPRDAIEARRVAPVDYALDLVKRASPQAPDGYAPAVVNCPSTRPSIRSADKLSDSETAWLQKRRPNTVDPMKSFLSRANIPNFDASAYIEKHRDNTTALPNIAISFSGGGYRALLNGAGALSAFDNRTRNATSSGHLGGLLQSATYVSALSGGGWMIGSIYANNFTSVQSIQDQGEGTEIWQFQNSLFKGPPTGGVQLLSTVDYYHNLVSTVKDKADSPAGAFNISITDYYGRGLSFQLINASDGAPAYTFSSIQDDQAFSNGEAPMPILVSDERSPGDIVVSLNATVFEFNPFEMGSFDPTTYGFAPLKYIGSNFSNGALAQSEGCVAGFDNLGFVMGTSSSLFNQIFLSLGGFDLPDFLTSAISSVLADIGKDHDD…
KZM26073.1	>ST47_g2788	MRNFTPSQVIVLLFVALCAAAPEARPDAIPQITNNAPFSGAVYLVNPNGEQVTAQGTNYCPSSASQSCSSVNAPSWCCPAHYACVAPSNSNGLLGCCPSGSACGGSVNAAQINTVTVQAQQYTTYVQPNPTVVVYNAPNTVQGGFCATITMDGPGLRRAAEGQCGTILLVAEGTPRLKMLSAAVSIVVVLLHVALGRIRC
KZM26081.1	>ST47_g2777	MVAFSRFCAALTLLGHGITASRVLTKRNDTESYATNLLHESMDWLDMYYDNERGYLFSLDSAALVHETRSSAWYAAGLLARNEADDAEQAVRIVTNIIGGQFKNKSLQWFGDYQIYPEEPTVGTEQYEPKIYNSWDPNWRGFVGTTFVLMLEEFPHLIPQDTQEYMIQSLFNTTIGDSYRVGGVDDDNLYPAYSNPSIMRAFVSGWVGRRVNDSNMTTAGEAYAQEVVDLFKRDNTLSEFNSGTYAGVSLFALTLWAKYLPQDSVMGQYGGEMIKYTWASLGQLYNANLKNVAGPWDRSYGYDMNRYLSILALQMWTLVGKENAPINAKPYAMGHKDDFAISPLIAILAPFHNTLVSNTTLSTLTTFPGTHAVNTSAFSPPFDTYPRNITAWMSANLTI…
KZM26086.1	>ST47_g2770	MLSMAKCSLLSWTVALSASTALAHPLFNGHLVSRADELLSEYDYVIVGGGASGLTVANRLSEQSTTTVLVIEAGQLDQNEDFVTIPGLAGGAIGTKYDWNITYAASEYLGGRNVSIAQGKIVGGSTKLNRMVFDRGSKSDYDTWETLGNKGWNWNSLLPYFKKNEIFTPPTEKIQKEYSITVDKNAHGYKGLMHSTYSPFFWPTTKNLVEATKSLNIPITKDQAGGNAIGGYFCPHNMDPTEYERSSAEEAYYDSATKRQNLHLITGQQATRVLTSGGNGTLKAHGVEVGIAQATHCSETDETQFAASADASLQTINAKREVILAAGTLHTPQLLQLSGIGDSALLSKINVPTVLDLPAVGQNLHDHVFLAVVNTINTTVAINSELTSNATFAAEARAQ…
KZM26089.1	>ST47_g2751	MHASTIAAILAFTAGMVTNAAPVRTNTSLDQLSAAFQPLPADVKREANPKGRRPSAGDVLDGAADAAGIVADGTTIAANSRREASPKGRRPSAGDVLDGAADAAGIVADGTTIAANSRREASPKGRRPSAGDVLDGAADATGIVADGTTIAANSKRDPKGRRPSAGDVLDGAADAAGIVADGTTIAANSKPDAAGIVADGTTIVNNSKN
KZM26090.1	>ST47_g2752	MKLTSLVLRVTSFVLAAGGMTMDELAIDFKMIDDSGNVVSPDKSTALAVRVGTDKMLQGSYAFLVFNNTGANESEPSVYTLRPGLVSSSEPIMLSGKEVFELVNANQSSSLASPVLTMPTKDISVLSSAIQLLVNTTDGQAQDLPSLLKGPLTSLNAVAGILPGTASQALLKRSLDQRDKERPTKTRENKGRKSARPTKPVNITLNLGNGTRNGAHGGGEMLQQGAFLTWICAALLVFAAA
KZM26118.1	>ST47_g2742	MFFRSIVAASALLYSTATAQTACNNSPSLCSRAYNNITQLGAHDSPFLRNKNTSFSTSGNHYYDTTTQLDAGVRFLSAQVHKNNNGTGANEWHLCHSSCDLLDAGTLESWLSTIKTWMDKNQNDVVTVLIVNSDSATASDLGSQFNSSGISEYAYTPASTGIPTTWPTLDNLIGNGTRLMTFVASLSEASPQYPFLMDQFTYTFENSYENVNPSNYSCTPSRPTGLTTSTVASSGRLFVMNHFLYETQLFGIQSPNETYASTTNAQTGYGSLGSSISNCTSVYGKAPWAVMVDFFNVGPAIASVDAANGVTGATGRRSLSTAPLTQESEGGVAKAQGSLLAVVVAVVVAVAFGV
KZM26120.1	>ST47_g2740	MRLILIFFLSIAYSPFLALCQSVQEDWTAPTLPDRTSSAQVGTSYTISWNSNLKSWFPTYCAACDAAKVDLWVTSFSSYEYTYKIASGINVVATSSYRWNVDIDTSALLASPDWVFRFVPSGAAANNRQQISSAGFNITAPAEASRFASATSTKASITSPARDTSGSVEAPTSSAVATSQSNTIATNPTTMPPAITNSTPAPSSAPQSKAWIAGVIIGPIVGIALGASLLWLLIRRKRKQRAEHHYQGNLGYEPEYHPAAFPRNTNATDKNTVLVGHAPMSPHVSELPPDSQPRHLQAGYQAELPAPLQ
KZM26121.1	>ST47_g2749	MRFTASWALLSALLNSASARFVMYADEWHPTRPTNAQDCAGIDHVVLAFAYANNTAAVGGWGDDAGFNTVSNSDTSIHKFANDVNTMLKNTGADGVDIDWEYPGGNGADYKQISNSAKSYQVDAFPKLLAATRNAIGPKKLLSIAVPGKKGDMIGFTSQTGPKIWPSVDYINVMSYDLMNRRDNVTQHHTSVAGSEDTIKNYLDIGAPASKINLGFAYYAKYFTTAGDCSASPLDCPIVPAEDPVTGKDLLTSGAWTFEKQHMAPVDASSLTVSYDGTCGPDKGTKCASGCCSQYGNCGTSPEHCSGACQHAFGTGCTDADVAGSWQNAAKNGVTDQRAGGQYYFDPANRLFWTWDTPELISRKFDDIVRKYNLGGVMAWSLGEDSNDWSHVKRMANEL…
KZM26131.1	>ST47_g2724	MVQTLFLSLLLPLVALAQDSSSGSDLPPAGYNGGSDNPQDADDAGAAGSSRGAFELSSGGLIAIIVVAVIVVIGGIGSATLWWLAKKRQWDVRQSIRRASRRITGRSTVNVSKQNRQNRRASIRLASPPPGKNARARQERDLEKGLPMSTKEGRTVTTISSTIR
KZM26137.1	>ST47_g2698	MFRTLLVAALAAVSACYTTPNATNSTTTTFKNPILDTVAADPWVFRHGDYYYMTYTNNENITLQRSKVLTDWNNAEFKLLFKPPPGMNYSTDLWAPELHGLDGNWYIIFTADPRNDSPPPETDMWCEYNCPAVNHRMYVVEGIGADPWTASYTYKAELNTYDQFSIDGTYFQHNDQLYHIYSCWYRKYDGWPANLCITKMSTPWTVSSPFTDRQIISTPEYAWEKTPFGRASNDRLSSNEGPQQLINPETKQNFLIFSAARSDNRNYCLAQLELVGDDPMNPSDWRKHPYPVLYQNPGAEAYGVGHASFTTSPDGKEDWIVYHGMQDPTNGWGARTIRAQKFTWNEDGTPNFPKPGYGPYQIPSGQ
KZM26142.1	>ST47_g2695	MKTAILLAAGALASPAVAGVHKMKLQKVPLSEQLKYANIQEHAKALGQKYMGIKSENHAEQMFKAPYVADGTHPVPVSNFLNAQYFSEISLGTPPQDFKVVLDTGSSNLWVPSSECNSIACYLHSKYDSSSSSTYKKNGTSFEIRYGSGELSGFVSNDVFQIGDLKVKHQDFAEATSEPGLAFAFGRFDGIMGLGYDTISVNKIVPPFYNMLDQGLLDKPVFAFYLGDTNAGQESVATFGGIDESHYTGKLINIPLRRKAYWEVDLDAITFGKETAEMDNTGVILDTGTSLIALPSTIAELLNKEIGAKKSYNGQYTVECDKRDSLPDLTFTLTGHNFTIGAYDYILEVQGSCISAFFGMDFPEPVGPLAILGDAFLRRWYSVYDVGNSAVGLAKAK
KZM26147.1	>ST47_g2658	MFRFTELVYLIASWSSLAAAHTVIVYPGWRGNNIHTNGTASPTDPNIIPGSLGINYDNGTLGFPYGMQWMYPCGGMPTSQNRTKWPLKGGAISIQPGWFPGHANAQFYINMGYGNEPLNYSHNMLPVFQITGPSNLQYDGTFCLPQVPLPANFTPQVGDNATIQVIETAQHGAALYNCADITFAEPEDVPEVNASNCFNSTQPGQEIGFQVVYATTSSPAPHTLVVNGYASIAVPLMLAAASYLTWT
KZM26148.1	>ST47_g2677	MKFTSALVVPLIPALSSAAALGRRQNQQGDGPQGGADATQGDLSGRPLPRFPFPRVEFPVPTETVVLNQTMYIYPGQIFDGQMKRYERVEGSCNEQAEGTDADAVFNLMSGATIRNVIIGQHQSEGIHALGDAWVENVWWEDVCEDALTSKGLNTQLRVIGGGARNAQDKIFQDNSLGGKFNITGFYAETFGTFYQSCGNCLNQAKRNVTIQNVIAINGTRMGIINPNFGDEYRIKNSQVQDVKFMVDKEIGNNVQTVPYTVGTGPDEKYALYNMTRDHITGFNGTATNVYEPEQPYEWLSEFWPEK
KZM26153.1	>ST47_g2672	MRSFAVLAMAASASAYAYNPTYNVSSSAVESYAASTPAYAASTPVYAASTPGYAASSAPAYPVASSSTKYEEYPVTSTKVIQETTFVCPEPTVVTYEEKTYSVTKATTLTVSSYTTTVVKTTHTPEAQKPSSKVETPVYSASVPPVYSASIPSVAPTHAPYPSSNATVPTAPQGTATGYPTGTKPATPEFTGAAAQAGVGLLAVVGALAAFL
KZM26190.1	>ST47_g2667	MSLKYLTLALAATACAAPGSPFQALEAQASSDNPCEPCQPSGATGSDPPAVGSDLSSLYVNVLNSVQGISFSKRGLTARAATSGFCCVASLNCVNVQSLNIPMCYDKFTTNFKFPDGSYGSLTTGDYHSNGQDINLLSGNYSGGNIYSAAPQDKPNTSALSVPAQYTGTGVGAAIPASELGSVIVYTTTVPGTTFTAPTTVPGTIRAATVNGVEVSTSIAPQTITQATTVAPQTTVVTTQVPDATAAASSKGAAGAVGVDSSKSFGVSVLGALMYFLM
KZM26204.1	>ST47_g2619	MKITIFLTIGTLFTAAAASAPNPSNTNININAAPRPAIFKSRVSSTLDARALFRLTIAEHAALQDRSNAAHDASTDAVNARSAVSGMSRKARTQPRSNHQPTDSSRHSQRRTTDDNNEMRTRRSGMLKARRQRARSTEQQRRTLRFLPSRR
KZM26206.1	>ST47_g2639	MTPSQALLLASAGTAALVHSAANASTAGKPNFIFIMTDDQDLHLDSLDYQPAVQKHFRQEETWFQRHFCTVALCCPSRVSLLTGKAAHNTNVTDVAAPYGGYPRFIEEGFNDDYLPVWLQDAGYNTYYTGKMMNGHSLATYDNPRINGWNGSDFLIDPGTYVFYNATMSRNHDPARNYPGEYSTDLVAAAAVGFLDDAIKDSERPFFLGVAPIAPHSETITSPRPAKFNPPVPAKRHEHLFPNVTIPRTPNFNPNTTGSASYFKTLRQLNQSEIDYNDDWYRKRLQSLQSVDELIDSIIERLSASPAVLNNTYLIYTTDNGFHMGQHRLPPGKSCNIEEDVNIPFFIRGPGVPKGAVQRIPSSHTDMVPTLFSLAGIPLRDDFDGEPIPVTSELLAKSE…
KZM26209.1	>ST47_g2630	MRSFITPLLLSLAAATPLVTENARSLSQLKQLECQVISVVVNALHGAPTATSFCSSLLKIPTATVSKTSTTTSTSVANTILSQTITATTVVTSVLSVTTGTTTLTADTVTQTTTAFVTVPGACGAIVKRTAKVISSATSNPASPASCGNAPPGLKQFACSQVSKACSCLAIPTPTTTVIVLSTASAVTVSTSIDLVTVPATITSTVTEAILATTFTTPTTVVTATVTSVTVPDTATDPNNCGACGNVAEIFGAVSASSNLLENALSLIKILRRAQRRQQGLVDLLILHEDELDSIKTILQQLEKKENSDLHTASLGAELVRMQQVQHRLAALLKELDPGSKGRINQFARQLLAGSAEEERLSSIMAELAQVKTSILLCIQMSNVGVMRDMNRQIVADAA…
KZM26213.1	>ST47_g2651	MAPPGRRRNSLSPATMLLGLLFLFSSTASAASAVLGVDLGTEYIKAALVKPGVPLEIVLTKDSRRKETSAVAFKPSKSGALPQGSFPERFYGADAMALQARFPGDIYPNLKHLLGVSSDSDAVKVYSGRYPALHITPTEGRKTVSFESSIFSAEEEKSFSVEEVLAMVLKNVRENAKVLAGTGYDVQDVVFTVPPFYTVEERRALEVSAKLAGFKVLSIVSDGVAVGLNYATGRTFPTVNGKEPGKPEINLVFDMGAGSASATVLQFQGKSVKDVGKRNKTVQEVNVLGTSWDRTLGGDALNSLIVDDMVNTFLDLPAAKSASITAEKVNTHGRTAAKLFKEAERIRQVLSANQATQAFFEGLFEDLDLKYKLDRPKFEQLTADVAARIDGPIHKALEA…
KZM26220.1	>ST47_g2645	MYHGIAGFVALSFVLRTGALQNASSISNVDPLQQPYPYYFPPQHAEGTPALFPMPKCQGITLEEATIDQLSGHMRDGTLTSVQLLRCCLRRVRQVDEYTNSIIELNPDAEDIAVALDAERTAGYVRGPLHGIPFIIKDNIATKDQMETTAGSWMLLGNVVPRDAHVVAKLRQAGALLMGKATLSEWADMRSNNYSEGYSPRGGQARSPYNLTLNPGGSSSGSAAAVAANIAPFALGTETDGSVINPAERNALVGIKPTVGLTSRAGVVPESIHQDTVGTFGRTVRDAAYAFDAIHGIDPRDNYTSAQQGKTPPGGYMQYLTNKAALQNATFGIPWESFWVYADEEQQTQLMSIISAIEAAGATIVNNTEIPSREQTISPNGWNWDFGTTRGYPNESEYT…
KZM26227.1	>ST47_g2652	MHASTLLSLLPLLAVSSAAPMDDVKRAVSASCPSYTIINTRGTGEAQGPSAGFRTMNGRIIAALCGGKIYNTVYPAGVDQYSAAGTQDIINKITSTLASSPNECFILEGYSQGAAATVNAMPRLTGANLNAVKGVFLIGDPAHKAGLTCNVDNNGGTTTRNVNGLSARIGTTIPSNWVSKTLDVCILGDGVCDTTNGQGINAQHLQYPNDTPTQNLGTSYVTKQLGGS
KZM26228.1	>ST47_g2624	MKLQLASTALFLFTIPAITLATPTLHARADSKTHLYVCTDDSFRGNCKNIELSVTRCYNIEKAFNDNVSSAGPDDGTFCVLYSDRSCRGKAIPFTSPGISGFAKYKFDNELSSVRCDFIWGWPKKSGVLREYQSIVTDDTSYRLASDDVSKETCNKRQSITKASGLKLNVYEVDSSSVGLLLDSVSPQTPIPSQKYRYMPMRH
KZM26231.1	>ST47_g2627	MRIPSRTSCVTQNLCTTLLLLSQTSLVAGIHHMNVKAPRRLERRKLDITPLLVTNNCPDDIWPGISTQSGNGPGTTGFKLTPGETRNQTVSEDWQGRVWGRTNCSFNDDGSGPAEGYGKACYSGDCNGILNCQVGGDVPVSLAEFTLDAGDGHTYYDISLVDGYNLPIAMVLQPLENVTLDDIPPNLTNPSCQGTAGLLAAQGYDPYLEFPNFLGTNSSYPLPWEEQVDQDKISRWCPWDLQQSPPDKPGDGVYPYPDDNIERPSFNPCFSACAKNNKPEDCCTGEYNSASKCRPGDYSKNVKEVCPDAYSFAFDDQSSTFIIPSGAGFEVVFCPGARSTKILDTSMAEMQQLSQQGKVDHQKARMLMERRQEMFSWDYETPGFFSRWLFPG
KZM26234.1	>ST47_g2622	MSAFQHRLRILGTLVLGLLATTQAQDSKRGFAFIGDSHAPDNKLLSSDNSPLAWYYNWSPYPNTNLIPTGSLEFVPMIHGMDATQDGRTESAIRGLDKSNTHLLSFNEPDGTTGSGGSSISPEDAARAYIDYVVPFRNGSKGGRNWKISHPSTTGSPSGLEWLRSFNSSCYDIDPENGCPTDFVAVHWYGAFSGLAGWLGTLNEFYNANSTNDSNLKLWVTELGLPQESADATVGMMNQTLPYLDSLDYVERYAWFGAFRTDDANEWTGDGVALFDDDGGLTELGALYMGNGFKEGQKGGGADSAAGMRRVNLAPVVAGLVAVLMSTL
KZM26263.1	>ST47_g2537	MAPRTSLFGTGLLVVFSLLSTALAGSGLPGSISDAGSSKKPSSILSSGARAATTQLTNGPAAPDLGAQCGPVLERRYATFIQPSDIDVLASSGVNVLRIPTPTLLGSSYAYKMPVIVNIHSLSGGVNGMGFGEAEGHFDWFNNATAFTYSLQAVGKALAFIQASGSPQSCTLVPINEPVDNRNFSTLGTPAALSENGAAWVLKYFKGEAYWSPSFPSTTNLVFDVHNYYFAGRPTDPDTVSADICSDAKLSASDGKFPVFVGEWSIQTATDNKFANRRKNLNTGLWAFGKYATGSAYWTAKFSGNVKVEGEGVRGGYWDWQKFVDLGAPWLQCRPNARARLASTMTDEVLVHISTPATRRNDELFRSLANAYTEFEPFRTHRDEPVQKKPKLDQATGLE…
KZM26268.1	>ST47_g2556	MRLSLLRNPAVLSLLGLSSAQSTSSWGEPFNVDVSTENLLPSSQQALTNIVGTNTPATTGLAPAVPITGGFSTTIPTELRTMSTGTPTGVVTVSSSVTGSAASASASASASASASRSSSASASAASSRASSSGSGAAKQSTAAAAPVGIQGQQKMMGVAGALAGAAGVLFV
KZM26269.1	>ST47_g2557	MRFFQMVASGAAFIAAALAVEINQYPTGGVKAGQTYTVTYSPADNTPTTFILRKGLSTDLATIGTLTSTATGGTFSWTVASDLPDGSDYALEIRQAGQSPNYSGQFGLTGGSAVASSSAASASASSASAYSVSSVIASHASSASSAASASASSAASLSSLISSVVSSVHASATGTGAIISTASHNGTVSSATLTGSATRSTGIPESTGAASSLSSAPLALLFGAAGVFAYLN
KZM26285.1	>ST47_g2593	MKASDLIALSVALFSNPSVSQGYTNQSEVPLYGQSPPIYPSPSGNGSTSSSWAAAYARAKDLVAQLTLEEKSNLTHGVTGPCVGQTGAVPRLNIPELCFADAPAGVRVQEFVSSFPSGIHLGATFDRDLMLRYGHAIGREYRGKGIHVALGPFIGPIGRVARGGRNWEGLGADPYLAGVGGGLITRGTQAEGVIATPKHWLHQEQEYRRMPGSEGEAVSSNVDDRSTHELYAWPFMDSLREGAASVMCSYQRTNNSYGCQNSKLLNGILKTELGFEGFVVSDWDAQHSGVGSANAGLDVVMPVAKFWGKNLTDAVTNGSISTERLDDMNTRLLAAYFYLKQDHGFPENAVYPYNVLHPIVDVREDHASLIREIGAAGTVLVKNVNNALPLRKPRFLNIY…
KZM26286.1	>ST47_g2590	MRYNAGLLLPALLALAPSIAAKKETPLVETTAFKNEIVNILYFDDSAVALLQELESGRIWRSKDAGKGWKREEEMNGNGILKSPYDNNVATVLGETKHWITYDQGENWSSFKTELPPSPEAPLSWHATDPKKILINEIDNCFTAPCLGRTYYTTDGFKSEPKLLIEDRRMCQWAKGSERFLMDSDKHDDRILCITRGKYSDRTKDFRLLTSDNYFKDFDEPVMSSGRTVQGMANMAAVKGYIVAAAKADHSSELTLYVTTDTDTWHHAEFGDHKVEQDAYTILESTNYSIQVDVMTSKYTAMGTLYTSNSNGTYFTKNVEHMNRNERGFVDFEKIANIQGVVMVNLVDNWKDYEKKGSPKKLKSKISFDDGRTFEKLEVKGKDKDLHLHSVTDLHNSGR…
KZM26310.1	>ST47_g2513	MLVRSLKIPPAFLLLLVFLAFFGWQLSQGPSHEEAPVDMSPVPAEAPPEKGTPRIALMTFVTEERSYHHLSLKSKDHYARRHGYDLIVDYESHTDRAVVFWKYNMAERLIKTGRYDWIWWLDFDTLVTNTDIKVTDIIKEELKNVTDPDAIDYLTTHDCNGYNSGSFLVRGHERSLKLIRDSFAIHDEAKKKDKHMSEQDATVQLLKDDKIMAESVHQVPQWKLNAFPQEIACFDDSRQVWEHGTFVVHFAGAWAHVKGEDPTGQLMKKYEHEIIWGDWREFYDQ
KZM26317.1	>ST47_g2527	MKLSTLALGTVISTASAAVIGQLEERATYAVVGKPEGFASGATGGGRAACAIPSSVAQLKTWLTDSTARCIVLDKEYNFKGTEGTTTETGCRPASNKCPGNGGQDAINKASWCTNGNAGAGSKSISVTYDTAGVAGINVGSNKSLIGVGNKGVIRGKGLRMANGASNVIIQNIHITELNPQYIWGGDALTVDGSDLIWIDHVKVSLVGRQMFVAGNGASNRVSLTNNEFDGSTSWSATCDGHHYWALYLTGSQDLITMKGNYIHHTSGRSPKIGGNSLVHAVNNYWYANSGHAFDIAAGGQVVAEGNVFQNVVTPLLSNTGKLFGSPSTSANTACTNSLGHACQLNAFGSSGTLGGTDTSFFSNFSGKSIASAGAASASVANTAGVGKI
KZM26333.1	>ST47_g2569	MRSTLALSLAAFAGLATAQTTTQNDYPYQIDPQSVSSANRQYWCDQNVAQCPLICLQQPGVTSSTTEDNECDPDQLTYSCVCDNGVAPNITQYSQTLPFYICQEWGNQCVTNCNGDNTCANSCRADHPCGAQSPFLGNSTTSSTMSSTSAPTGSAATNTIPVTGFGGGGATSTASGGSTGAAAATFVPGAATSMAVLFGSVFLGFAVLL
KZM26356.1	>ST47_g2588	MRTTFAITGLLTLASTVFAAGEGFIGNTPSKFGNHSTETKEYIITFMRNETAQFRGVKKYLEELEIQDNDGDVVKWESTNDRIKVMVFAICDTHAQYLAKNYPEVNIVEEKVSVQSFGQKSAAPWGLQRISSDAGASGSPQSQDFTYSFSDENLGAGVDIYVIDTGVRTSHAVFTGRGTQGFSATGSSVDGDGHGTHVAGTAGGAKFGVAQGANIIAVKVLGDDGSGSSSDTIAGMDWVISNHEKRKTQPGFVGSIMSMSWGLQGTANSVDEVIASASEAGIHVSVAAGNDGTDACGSTPAHLGGSNSNVVTVGSVNIDNEVSTFSNIGKCVDIYAPGEQILSAWSTGDNIINFLSGTSMACPHTTGVMATLIAADPTGLGQNPAALKKKLLETARTSK…
KZM26362.1	>ST47_g2462	MISVPYTWACLLLGAAAITFITSTAREFFKKASQPSAKRRNSTITANLAEDVYYNITPLKDFNINAEEPIKARPFKPKFHMTMAIENITLSELVVMDKTYHERIKIRRKLLAEEHHEVLGTNPKATPAVLEIYKWLTHTYLPERFPTLFNLTSTGLLNKTTQESLPLTADSAAHALELMGSHINDDFLFLLPSDTPEDAGKYRLEAFVTCFPSGFRTRSKLGLVLADIHTPVPHYKQKLELSMDRFFAMLPLGRIVQRWNWTITTSGDLFCRAGSHATPDEAARQSTDVNLRTTFLRCERQTLHRLPESKAIVFTIRTHLYPITDLRDEGSGEALCEAIDGLETGSVPKMAVYKRQVVWGDKVKAFLRGEIEVDA
KZM26365.1	>ST47_g2461	MTDLFVLLLNLIQGLAEALGFRNYNLCKTNKSKLKQDRFSMSTTGPPKDASVPTLKDLTIDNITENVVRINSQCADPRLKYVMERLVSHLHDFARETRLSFDEWMAGIQFLTQVGQICSDVRQEFILLSDIVGLSLLVDSIDHPKPAHSTEGTVLGPFHTHDAPADQNGFSISADPNGEPLLVLCTVKSTSGEPIEGVKVDIWETDSNGKYDVQYDDRGSKADGRAVIHSDKDGVFWFHAIVPVPYPIPHDGPVGRLLQKLGRHCWRPSHMHFMFDKHGFDHLVTALYLRGSDYETSDAVFGVKESLIVGLDTVTPEQAKEYKVSEGTKLLTYDFVLVTDEETKKLRHDEAVRAMKSLGREEGMTIINGVPVPDVD
KZM26371.1	>ST47_g2488	MKVTQAVLATGLIGQAAATWNMFGNPFNSPSYNNNECSDKQKSGFDWSDLKDGDSDFSYGDFDFTGGWKCSNSFGKRDALSKRTFGSKCIKNKISKEKPASFGCDKRKFGFSITHIDVSVEYDVDLELHYKMPTGEICRQVAPCSASGSTIQNTQCGGAKSVDVYLPKHDKSDKECEIGFHNIGFDCNPGKGYNPPSPPEVPSSSAPVISQPATTPVVSQPASSAPPSTTSSCNGDECNTQPPATSSAALPCDGEYCASQPPASSAPASSALASSAPASSSAPATEVPVSSGYDVPPTSPPSPPASETHASSVPGISSPPATETPTAPCSGGYGESCEGTTAVSSAPIETPSSGVPATFSSVPPFTNSSAPASTVPPTYETSSTASQPPASESATVPAC…
KZM26380.1	>ST47_g2494	MQLSLALSLAALAALASASIAPSNTSTVNARYFQGTLPLQHALGDGQQIAELIPLTREGAQRSIEGSLYRTNGSTVSNMSDGDIAYISCNPADYPGFVGAQGLFDQAYGNGNANLSGIILYSTVTDYCAYDPDGNAAMSAFPVLSMTNKTDSAAVLAQIDNLAVHMKYFVQVQGRGNDASPNNTQQQNPLGPSPSTGVAMIILYSITGIITALFLVIILTGAIRAHRHPERYGPRNVLGRPRQSRAKGLGRAILETIPIIKFGEKEPVKPTDVELASTSESAHVEGATINPATATPPSETTTATATQAASNDALPATARTPQEPAMTEQPDGIAAAVTPAAVMGASSDTSSNDDTLGCTICTEDFEKGQDIRVLPCNHKFHPDCVDPWLLNVSGTCPLC…
KZM26398.1	>ST47_g2478	MKLSSINTMLVLVGGAVSQATSLNITAISAANNAARLECWQLAAPPVLGRGAVNFALGDFDDAFVGIIPPNTTAGTLNNAAQVQYSLFLSGLAHISTPDSGLPAHLNEVWISGGRHGMLIAADLKEVAAKGHITEFPSQDRTIIAQFPVAGNQAPKHRVLHVGPCTWADLAGL
KZM26418.1	>ST47_g2429	MRTCAIAVLAGLSSLVSSQTLDLDYIEAQTLSTATINLYQQAQTVEYNQATAIADVVAAVLETPVADPGKERFNTGDVLQKRDEPAVTFQVLVPICQTLHGTLYDSPEDTVTDRVGKFLNDAALQDQAVNAITPAGYTQVFRNLKNASQANGYMGYRMLSTYNVSECANICTSTLGCQAFNIYLERGPSQVPGTDCLDPPALVNPFCALWGGPVSTDNALNEGQYREQFHVVITASNGYVASSSLNRLSSFAILAPLDCNGNDSYMGMRLWSDGPFDRQRCAAICDATTQYNVDHHPVDSKIPPRLCKFYNTFIVSKNFISQGQYCAMYSQFWDPELYANNSGQYDGDGNRYTISSSEFFHNNTEVTSPICPADLAGLRDDYIASVFCTSYISYAGPAT…
KZM26422.1	>ST47_g2444	MKLSTSFVIIASVTSAMAGCYSGGQAWIDDCNKNAFRGAVRDLCKGTLSGYFDSPGKTKYACANSPCNGIRANFAVGWRGRSGGYSLAENDCVTRLNNEIDHCDHGGESTVADWFFQ
KZM26432.1	>ST47_g2418	MVLGILIAVIVAPGLLGSQEAIRQGQSKDKREEHRARRCNLIATCVKSSPRSREIDGRPVVLRNGKLWIDTTTEDGEPLGHTCAGYYLPYPDTKYEGLVTTITDVAPIMNWVYIDRQTHEARYGVRADAQPNLTGPFDCTRQDRRLTFDGWEGWCAVEEYEGYWCLYFDVDDNGLRSKVAPGTRVLEIELSRKEKRFKKDDEGRQQDQTTKREVDNREDAPTDRPLRSEADVRRPGVFDEPQSELETPPADDAMPKTPPPAYSKTNKPSTSPIQGRPKKGAVDALDDFLAMEVQANVTSVPRVQTQRRSTSDSPPPPPLQPQLPTPLEERRVTPKLNRNSGSKAIAQAQIFEAMAAGQTQNSDNISRRISGNKRISLASSNADSASVYSEEDQRLSREI…
KZM26442.1	>ST47_g2423	MKFSSALLPLLAAPFVAGEHTSNWAVLVSTSRFWFNYRHLANVLSLYRTVKRLGIPDSQIILMLPDDMACNPRNAFPGSVYNNADRALDLYGDNIEVDYRGYEVTVENFIRLMTDRVGEDIPRSKRLMTDERSNILVYMTGHGGNEFLKFQDAEEISAFDLADAFGQMWEKKRYHEMLFMIDTCQANTMYSKFYSPNILATGSSEIDQSSYSHHADQDVGVAVIDRYTYYNLEFLETQVRDPTSKLTMGELFDSYDEEKIHSHPGIRYDLFEGGEHSARNRLVMDFFGNVQNVEVEGEKRNETRWKQELEAIEKMILEAKRRHNESLSMDARVQRIAEEAKPAQSFKKQGAAMVREEQSWSKQIVGAVALAVCAVAWAAGSWLES
KZM26456.1	>ST47_g2261	MRSLSFLLALLFACAATSYAWPSVNFPPLEPRRHGNDTESNGTERALKKSCRKIRNLAVLSGLASNQTKLDAWVAEGRLNTAEVDAIKAKAANATTELQSLQTNTTLVGECTVVNAERESVKQCKQMMKLAKLASLAGNDTATAAFEQKKGLNETGIENLKAKIAEASTKLQEMQSNTTLTSFCTQRQQQNGDASDADDTTAGSVQQASGGAAGLTAQTITYILASALAAVFTLFL
KZM26458.1	>ST47_g2263	MRGFFHFLAIAGIVVAQDNYTSQALKTPSPSATPEPLFSVAGGGGYPTCKATTITKWQDKPYTLTVPASTVTVIKSAPGKTITTTCTETKYNTKTQTSTSTCTVTETTTKPGVNVTTTTTVYKTIPAYQTITGPGIPGQNFTITETTTCTSTLTSTKWSTTTCTTTETLTVSKDITISGSHIYTTIPGPTVTLNNTITKTDLQTSTYTVTAISLVPTTAVETWRTTDVETFRTTDLVTFHTTDWSTFVSTSTTTYTTYITSFITTSYPVTIDHTYVSWKTSYITTVETLTSTVSFPVTQTIEGPTQTVMTPGPTKEVTREISVPGPVETKEVTKDVTKEISVPGPVETIRTTEWSTYRTTEVSVSTTTYSTVFTSYITSWYSTTYTQPGATITSWATTI…
KZM26468.1	>ST47_g2229	MLFSASIWTGLLYTLTQAHASSQTLADRPWLDRTLPNEQRLQLFLDQLNSTQKYAMVQGDTELDDNGTGVNPCIGHISGNETLGVPSICMGDGPAGVGNSLNNVTAFPAPIAAAASWNTSLEYAYGQALAREHMAKGRNVVLSPTINILRSPLWARAAETFSEDPWLTSRMAVAGVMGVQSQGALACPKHLAGYNQDTNRFGVGPDWDAVDVHIDKRVLHELYLPAFKASIQEADAASIMCSYNMLNGFFACENDWLLNTTLRQEWGFRGFVVADWYFSTRSTVGAVMAGLDISMPGGSLESSYGFPAYYGDLLIEAVDNGTIPASRVDDMVARVWRYMFKLGMVDNPLAGDADSVARTQAHLDLAQKMAEDGSVLLKNDDHTLPLSPQRYNHVAVFGV…
KZM26481.1	>ST47_g2360	MLLTAALGLLAGTALATPAPGGLMKTPLSQQDLALLGAGVLALLAENMPGRNDAKLYGFASTLTHPCGPTYVGTYTLGPIVDSDYHVVQDGHDSPVSSNRPGYVYVFGTKLSIEIDGNTVSYEYGALRWNSTQLFRPGDDFSCLASGWSNAVSCNESDSSDRSQDMFCVLWDKSGKHGKSRPGDTNASVASVAPSIETQSAEDRSKQIPSYPSGYLEPGPVSPSTVPEVMHGLSRHAL
KZM26494.1	>ST47_g2286	MHNFILATGFAALVSAQSQVVEAPPPPPVLLSTTKSGVLPIIPSATGTPFAGVDTLQGAIISPLPPNPSYTGVLGPAPSQTNQPAATYVATLPDSMFNPLVGDAVQGTISAVGSSSGVEFIVNITNLPDQAAYGPFNWHIHTLPVPADGNCTATTGHLDPQNIGELYMCNPAAPATCQVGDLAGKHGGKISTPGSFSTSFVDHFLSTEQGSPAFFGGLAFVLHTRNTSRITCANFQMHGGAGNATAGNGTIGGNATATSSGGLPEYTGAAGRLTVGAAAVVAGFAVALL
KZM26506.1	>ST47_g2325	MRAYAIAAVVFAVFATGSTLDHYILSALAPHTPTASPGLIPHSVRPTPPAVQPHIQDGLELRQAPGLVPIATPATDMVAPEVPLAVLPAPAPALPAADPPAVPVAPSVPANPPAATAPVHSSVLPLPLNADPVLPVPATTVAHPPLVTGDDFVTVQWIETHMGTLRTWIPKTETFHFEIMSQAPPPGVGSIGMGTLTGKTGQTQTIHMVGAAQTPAAGLRKGIAAAVAVGIAGLVV
KZM26522.1	>ST47_g2309	MRASSFLAPLFFAASSLAQAVEEGIEPSSPAPTGCKTTVKGNFTIGVENFFSARSKRETAQEAADGLLFCTLENGILRDQYSRTGSVVANRQFQFDGPPQAGAIYTGGFSVCQNNSLAIGGSARWFRCMSGEFGNLYDESIGDQCTEIRIIADFVNDPSPSSSLVLPASTTLSLIPTGGAGVTLVSSVTASSVASSSVAKSTPSSGSSGSASSPSATSTPSRSAISSASSSASESASGTSASSSASSAAAAPPASAGRAATSSPMTRAVLLGAILAVFGAAIIL
KZM26533.1	>ST47_g2334	MHLTNILLLASSAAAISLPNFPDISQIFARKDGDKCPTVWTSISKELTGKFLTDGQCNPDARAAIRAVFHDCGAWNKAQGAKGGCDGSLVLAGELSKPENNGLQAIGAYLKGRADFWKVSVADMIVFAGSHAIVTCPGGPRVQTYIGRKDSSTPAPDGLLPDVRAPADSLYRLFLDKGLDAVDLAALLGAHSTSNQFHFDETAPNAGAPQDSTPGVWDVKYYAETTAPPKGVLVLPSDAKLAAHATVGKEFKGFVGNAGKWNGKFADAMARMERFGSDGTKKLIDCTNALPSATNAKRELKVSPYLTTLNLPATLLPRNMAAKLVRTSLPPKLLQHIETLELHRHLESALSKPLKHLPADEASKLLGVISHTTPTHRILTAQ
KZM26549.1	>ST47_g2320	MKSALVSTVALVSAAVASAKITLPNGWFKIPPKEKIESGKLNGKPRYLTWMADSQIKHGVEPTFAYTVSAYLSGILLAYDRTGDEKYRDYVKRHADTVLYPAWNGEILLHNNSNSIDDIRFGHTFLDMYNITGGEEIYKIAADSLKDQIDRSFRTPDGGFYHRYPAYIDQMWLDGIYMLDVFYARWTHEFQPDNTTAWDDIALQFDLINAGTTVDRERTNGLPVHGFDVSKKAIWANPDTGAAPHVWGRAVGWYIMALVDTLDYFPEKHEGRARLIEYLQAVADAIVAAQDSRYKGWYNIMDPGLERRSGNYIESSGSAMFVYGLLKGVRLGYLEDKKYLDAALSGYELMTETFAEKRKGDGALVWEWTVQTGSLSSNGTFESAQEKLSTTTGDEVGFE…
KZM26564.1	>ST47_g2273	MLVSSVLAFAALASATPFGVVTERDIFPAYPLTQILPVPGYNSTTDGFNRLGNLYTNSAAQLTAQANEIAQKTIALNGSGGVTYNYDVKASLASSLTILNNLLWQTAYQTEQRVCAIVTSINQQNVDTVNGNLRAGIAAEVQAIIRITVTLTTTIATIKAQLAAFSEAERVVVATLIQAIATAASASLGPAAQLSGGLSAAGLTGLADVVGGLQVAITSLQALATINWSF
KZM26590.1	>ST47_g2233	MKIQSLLLLCSSTALVWGAKCPQAIGENGAQAVERYKATGQCSDVLGIADTLEKRVPVTKKPAAPVVPPKKPTPPKTPPKNPPVTSPSPPAKPPANPVTAPKSITSSAAPIGTRGAACMYCNEGKKKTPTTKPKNIARDDKYGAMFERATTPAKPGQQRPATQNPVCIKPPASDRTGKRSISEVARDLIFPRALIEKDSKVDTMLGTAKTKWICSVGKYAPTADAKKIAEITKYWTFQDPADPDKCTVEVGRVAQIDISATDKYETDHVYEAQTLANFIKWLADENGNIGTTYKKPTADWVEKQILGQGPFRIVSPGNTAAGSLYTPSTGEIPVVLMAYGFGRSDGVEGTSAGKTVERVPRERGNKNLVLLDKNINGPKGIWFKKNKLNSDWKGHVSQE…
KZM26598.1	>ST47_g2372	MKQNIFCLAATASIVSCKPQYGTYNPHEWIPGGPDDFRGPCPMLNTLTNHGFLPRDGRNFTKENVVKGLGDGLNFDSTLAGIMWEQAIIANPEPNATFFTLEQLNVHNVLEHDASLSRTDAAFGNNHVFNQTVFDTSKAWWTDETVTAKQLAHSKIFRQLVSRASNDNYTFSASTEEFSLGEVAAPIIAFGDTNVGTVPKDLMVYFFENERLPEELGWTKKNHSITLQTILSTTSIVRNATNLLTGGGAAPADPHKRRDLHSGLF
KZM26600.1	>ST47_g2370	MKFLSLLSTAVLVASSTAIPYDEYILAPRSRTLYPVSVHSTNGSVSSPESLTNSNGSSVFDGDAATAYDFGINIAGVVSLNIGSVSDSSQYIGVTFSESSLWVSNASSDATADAGKDETLWFHVTKPGRYTAPREKERGGFRYLTLVHNSTGTVEVTSAEVHYTAMPHWEDDAIANYTGYFHYELLNRIWYAGAYTNQICTIDPTHGDALIHIRQINSSISDATNVTWYYNTTITNDMAIAVPGVVVSTNDVISIENSLKSLFDIQAENGRLPYAGRPFPNSVSFTYHLYTLIGVADHYLYTGNIAYLQSLWDQWKLALSWSLSYIDSSGLMNVTSPADWLRFGMGGHNIEANAILYYTINHGIELATALNDTSSTSNWTTIAERIKSSANELLWNDEA…
KZM26602.1	>ST47_g2376	MVAWKLQSLLLLSLRALNAFALEVENVKEVPEAQTPNLNVKISASFPQSEIFGVKLINGHASEARLSIANNEPKPIGVSIVGGSLLQEVNGQSQVVRNLTSQKYSIEIPAGAEETVPYTFTTDLYPQDLRLQLTAILRNSENAVFTVAAYNETVSIVERPTSILDPQIIFLYLVLLGAFAGTVYFIYNTWITTFFPQKKGRGKGGERAKKSSQGSKKVDPAEQVAVVGADGPAVTSGAKYDESWIPASHLQRPEAKRVRSGTPKVKPRA
KZM26606.1	>ST47_g2354	MIIGGTLYVAVLQAILIATVLRQADGERSSSDRRDNNCNYSRRASSSASYQSISSNNMGTSGIGNLGSILNLTKMEYYVAVFNQYLQRFFSASNKGTISQPSSALIFDYRACIDTTESVQSRVRNANGDMREETATIELELAVSGIGELPTINPAFSTKQARFIYTILDTGLSSYIDSLAKTDLVTGETLTWSTKNHTPGEAVFVAVAEDEGYLLSVVLDGETDTSYLLCLDARNLREDARASANVPVAIGFHGHHLAQTNF
KZM26616.1	>ST47_g2297	MLFNRLFPAVVALLPALASASAPASSVIDLTPKNFDEVVLESGKPALVEFFAPWCGHCKNLAPIYEELATGFQHAAGKVSVAKVDADEHKSLGKRFGVTGFPTLKWFDGKSDKPEDYKGGRDLESLTKFITEKTAVKPKTKGKLPSAVTYLDDQSFKQKVGKDQDVLVAFTAPWCGHCKTLAPIWEALASTFVNEPNVLVAKVDAEAENAKALAKEQGVSSYPTIKFFKKGSTEPTPYEGARSEDAFVQYLNKNSGTHRAVGGGLDATGGTIEAFDTVIAKFQSAYGDGVEEATTLASTLKDKYAQYYVKVFQKIGANKEYAEKESKRLQGLISKGNLAPEKLDDLISRSNILRKFLGTDDKSEL
KZM26621.1	>ST47_g2292	MRFFRLLPLALVGICFAAPAPADGNTTGAVQSLEAGIAVHSIADNTVTTLDAPFKAPSLLPRNETSVRTTPENLHRTSISISEYCDAGVLKARGWLSNGRVMFELHLNAEQVTKISLHPGHDQIVGPYDFASHAFGIEHDGCKWSSEGGYPCGWCKAQPWTLGPLNCQTGQRGNQRLTYRTCYFVDHNPPTLSARGQEPTISPPPPAPSLPSENLVTIQGSTVTLHPLIIQTTLPATPPNQISTILPFHLFLYESCSPNTSPIAGAVYKNGNMALSLSLTPGLKTSIQHLVPGYANLEVGPFEYGASRVGFRIPVRSIWNSRFTNATLNIQPVTELLGYLKPIRLAHNISH
KZM26641.1	>ST47_g2390	MRFSGLLLLGLSGLGASSPLDSHIVHERRHALPVAWTKHSRAPKDTVLPVRIGLNQRNLEHSDRFLDDISDPDSPNFGKHWTAEQVANTFAPHPEASKTTLEWLQNSGVDLKRVKHSVGRNWVEFSATVEELEGLLQTEYHYYKHKASGGFRIACDEYGLPQRVGKHVDFVMPTVQLDGLQPVAQAKASIQAAVNIIGLSGTANCSSLITIDCLRAIYNLPVGKYNHTGNQLGIAEWADYLYLPDLKTFFENFTSPKIPSDVVPEFISIDGGKASNLSLAQQEKVIESALDFQTAYSIIWPQNTRLYQNGDSVNVDSVGTFNIFLDALDASYCTYQGGNQPYVDPAYPDPNDAPGAYTGPLQCGGAPMSNVISVSYDQIEGALPRFYQERQCREWMKLA…
KZM26650.1	>ST47_g2399	MLFSTVYTAAALFVAQAAAHGAVTSYVIDGVTYPGYTGFSPASSPKTIQRQWPDYNPTLTITDRKVMCNGGTSADLSAKVAAGGKIKALWSQWTHEQGPVMVWMYKCAGDFASCDGSGKKWFKVSLHEKN
KZM26656.1	>ST47_g2201	MRSVCSASIVGLLAVGTLTTALTLPKGNGAYETTFSEFELVDHARKERFDSSSPRRLMLSRFDPISPAACLTRYKKSYMSPIYSTAFEAVVAQLNITLPRGFFTQLDLDLCKLGSNTTLPSVLAPDAPPLVIFSPGNAGTRLLYSALAQELASRGSTVIAIDHTYNAAVVEFPNGDVVYGVADNYPSVEESLQTWVETHARDISFVLDHFGLEDSPNATRAVIMGHSLGGAVAHTVLRDRRIRGAVNLDGPISERAQNATIGCAGREQAVVLWQKESLDDAPLQLEGWTRWKETVGRSAHADFWAHVRLKSTEHYAFLDAPLLFDLTGLRDKEGLHIPIVKFFGTISGKRYMEVMGSYTQTFVEYLFGKNSNLDLDIYVNPPNDFSDVEVVS
KZM26671.1	>ST47_g2177	MVFNMKAAGILATATAVSASVLQLPVVIENSYASVEFLVGTPPEPYRLLFDTGSASAWFTSTSCTAESCPSLGSYKRNHYSVNSSSTSTDLHAFSGIDYIAGDGIAGAAIRDVFSTPDGSLEWNQTFLAANESSWRWITADGFLGLGFSSIAQNATTLVETLLWDGKLDEPRFGLFYGTNLKDTGDQNGVLTIGGSEEEKYVDGEVVYTPLRKEKPYELWRGPLRSTGQQPVTTDAEGVSPSANVTWEMWGFGSAVFDTGAGRVSIPDEIIDPVYFNLGWNLTKLLNGEESMDCQHMNASWAITFTMGEGEDHTKDVSFSMRGDEFLKAGDQCMPPFDNSGNTQFALIGAAFLRRWYTVFDFGADKVEDYQPRIGFGRLKKEWDYLSH
KZM26687.1	>ST47_g2139	MLSTIFYTVALAAGLAQALPQATVVPNAATPVRAETTAAPQPRQAAINPFAGYNFYANPYYSSEVHNLAIPSLPASLRPAASAVAKVGSFVWLDTRAKVPTLETYLADIKQKNAAGAKLMATFVVYNLPDRDCAALASNGELLIDQDGATKYKVEYIDKIAAIIQKYPDVKVNLAIEPDSLANMVTNMGVQKCSRAAPYYKDLTAYALRKLNFANVDMYLDGGHAGWLGWDANIGPAAKLFAEVYKAAGSPRAVRGIVTNVSNYNAFRIGTCPAITSPNANCDEERFIKAFAPLLQAQGFPARFIVDVGRSGKQPTGQQAWGDWCNVQGAGFGPRPTTNTGNSLVDAFVWVKPGGESDGTSDTSAVRYDAACGRASAFKPAPEAGQWFNTYFEMLLKNA…
KZM26691.1	>ST47_g2184	MYCSTILSTGLFAATVFAHGNITSPPARLPGPAMAKVCGQAAVTAINADGTGPLENIPSNGSPQCNIGLCKGAQFADNQKNVQQYAPGEQVNFAAVLPIPHEGPCNISIIDTASNTMVQTLLVFDSYADENLAQLPPNNTKFSVSMPTDLPAGSCTQPGACTMQWFWFGTNAQQTYENCVDFVMTA
KZM26696.1	>ST47_g2183	MPSKIQIAAILGAVAASVNAHGHLAAIKVDGTDFTAYDPSFQYQSPPPEVIEWSCPECQDNGFVDPSMYTDATKIACHKDATAGAKTAKVAAGGKLDIQWTTWPDSHVGPVIDYMAKVDDATAAKAGDLSFFKIDEAGYEGGEWAATKLIKNNQTWSVTVPSFIAPGQYVLRHEIIALHSAGQENGAQNYPKCINLEVTGSGTETPAGVAADKLYTPTDPGIKVDIYSGDLSAYKIPGPALFSGASSGSSSGSSNSSATSPAATSAPAASSAVSTPVASATPTAAASSAAAAAATPTSTGSSDSSLPETFTLETFISWLEKAAGSSSAKARRHARAFRG
KZM26699.1	>ST47_g2141	MRFSHFSILAFGSVSIASPVLSKRADAVSLLTDLYATVQTYTGAINITLAPLSASSSVLEKTAATAQVGAQINLITAAITATTNNVKTLPPFKSTSAKRSVSADLDFDAEPTGVDSQPKEKRQLIADGALLALIIVEIFATVTAAVHILGLAGLIVFLNSLTAALSLLILAVELALDVVLIGVIALLDSLLTALALGVSGLQTPSLGLLGDAF
KZM26719.1	>ST47_g2152	MKSALSSLLFLLASLLASMLPLAAAASDKPLKPCTVVSPTTERFFDLNGLRRTLPEDGKKKKDADEGSWHAKGYDYGANFTINFCGPVVEELSDVQDLDKKLWRNVSAFYERGDRQYAIGLENSEPIFRGKKLILNYTGGSLCPSSSSKRSPVHLPREIIGGGGGHDHDHDDDKKHKDGDADDDDKKHKGGSDDSDKKKKPSSDKSERRKTTVISLLCESDPLGKSSISFVAAVDDCTYFFEGRSRFACGSVHAETQTLSPSGVFGVIALIAVLVYFVGGCVYQRTVMHQRGWRQLPNYAMWAGIWRFFSDMFIILTSSCARCMPSRRGYSRVSLGADSRGRGRRDESENRLIDNLDEEWDD
KZM26721.1	>ST47_g2155	MRLNQVLAWVTLSLLPTQATARALGSKPSDLIIAERAPLQDIVTWDEHSLIVHGKRVIFWGGEVHPFRLPVPSLWLDIFQKIKALGYNGVSIYTPWVLHEPKSGSFQAEGVFDYEPFFDAAKKAGIYLVARPGPYINAEVSGGGLPGWLQRISGNLRTPDADYQQASKNYIEHITPIIAKAQITNGGPVILFQPENEYSAGLNNVTFPDADYMNHLMKQFRDLGINIPLINNVAWPSGTNAPGTDAPVDIYGHDAYPLGMNCTVPSYWIDDALPANWRETHLEQSPNTPYMLVEYQGGAYQPWGGDGFEKCAEFTNHEFERVFYKNNIAAGATIFNVYMTFGGTNWGNLGHAGGYTSYDYGAAITEERQVHREKYSEAKLIANFVHASPALAAAVPGYN…
KZM26722.1	>ST47_g2159	MYVSNIFATALAATSTAQAFNIKEEAYNAGQVSKRTLGNIFGTLSGLLGINKASESCPAVWSQISTQLTAQFLADGQCTDAARAAIRSSFHDCFNGACDGSLILADECSNVENRGLERLCGNLKTVQANTGVGMADLIQFAAAHGVKTCPGGPTIPVKVGRKDSSTANAMGVLPSGFANSGDLIQLFASKGFSPIDLAALLGAHTAAKQRFTAPDKPQELDSTVGVWDNKYFSETKSGKAPFTLPSDKSVAQNPLTMLPFTTFALSKGAWDVAFVGAMQKMSMLGVDPRGLIDCTSALPGGSRKRDVKSSNLFDRFRF
KZM26734.1	>ST47_g2120	MKCSTICAAFFAAVVAASSDVTQLKTDTFKEFVQENDLVLAEFFAPWCGHCKALAPEYETAATTLKEKDIKLVKIDCTEEQDLCKEYGVEGYPTLKVFRGLDNISPYSGQRKADSLISFMTKQALPAVSEVTKDTLEEFKTADKVVLVAYFAADDKASNETFNSVADGLRDNFLFGATNDAALAKAEGVEQPGLVLYKSFDNGKDVFTEKFDAEAIKSFATVASTPLIGEVGPETYAGYMAAGIPLAYIFAETPEEREQLAKDLKPLAVKHKGAINFATIDATAFGQHAGNLNLKADAWPAFAIQRTDKNEKFPYDQDLKINEKEIGAFVQKFLDGKIDPSIKSEPIPESNDGPVTVIVAKNYKDIVIDNDKDVLVEYYAPWCGHCKALAPKYEELGQA…
KZM26746.1	>ST47_g2111	MITMSPTAPPTPAPIPIIFALSAFCAVADEVADEVADDVLVGALSEVVEPVAVGPNDEVLTPDTDSGADDEVALVNAALVDAPNSAPANVKTAFSVLQHLCLSASLSQQYFASSPYP
KZM26755.1	>ST47_g2100	MLLKSLSLLLAAVGTTQALTSNLTQIFNFGPNPRNVTGYIYVPANLPKNAPILVAPHWCHGTALDVFNYRSWASAGDTYGFISIYPDTPNAADQCWDVSSKQSLTHNGGGDALGIVSMVRWAIKKYDADASRVFVTGTSSGAMMTNVLLGSYPDVFAAGSAWAGVAFGCFAGDGYDVWSDACATGKIIKTGPEWAKIVKSAYPGYKGFRPKMQVFHGLNDTVLYPQNVKEEIKQWTSVFGISDKPTDVTPNTPLTGWTRYTYGKTGKFEAYTAEGVDHNIPNQDDLVLNYFDLKCKDKKCYSRKSG
KZM26756.1	>ST47_g2103	MLRATLTSIVLFLSLVATIIASDITTFTDAKCTRSWRALDTVNGYPDGLCKPLNVTMGQSFQIQGLDPGCTVTLYGANAGPLSCSSATKTVGHLATCYDPSWVYYSIDQCLPPTPSSVKVSSVRPTSAGPSATKGASATPESKVHTGVIVGSVVAGISCAVLTLAGMLLVLRRRRKATPPRPTHELSGDRALAESDAAAERNCPKELWGGHAAVEIGRNSRFEDTSSSRSTKDAQTLQGVNPLIRIHYVR
KZM26768.1	>ST47_g2073	MRFSTLFPMLLVAGVAKAQFGGFGGGGFGGGFGGVNPGQQGQQGQQGQQGQQGQQGQQGQQGQQGQQNQQNQAQNGQNNNNNNNNNNGGGGGGGGGGGGGGGGNANLALDPNNVQANSAATGLEAGAEAGQAASDTDNANFINVCSGKTLTNGLQVREGSCNGIPMGEIPAANQMVSAVFTSPQNGDVVPPNTAMKFSVQIANLQAGTFTNPDNTYYAAPQTLSGGQVVGHTHITVQDLGNDPNPTQPLDAETFAFFKGINDKGNGNGLLSADLADGLPEGFYRVCSMTSSSNHQPVLMPVAQRGAQDDCVRTIKVNRANKVNKDSSKVNKGSSKVNKGSSKVNKDSSKGRKVQVVVDVDVSGGPDLLPVGLSPRETYSHGMARVVVRGNTSTASVLRK…
KZM26769.1	>ST47_g2093	MEIINVFLALMSFLAVALAGQDRACKEGSLKCDGGSPGGAVFVCNDGVWIVLMACRSYENCVKKPVPHCTWASADAGSADSDPVPGFEGLPAEVSAAADDLKNATVADTVESSTAANNGSPNWNVCTPCMRHNDNCRQSCTFQGDECDIACGWKTSSVNLTTGDLRQPTVSCGDFCKWPYQ
KZM26772.1	>ST47_g2096	MKFLGVTLASLGLASAASVSNKQKVSYDDWKVFRVNGPSNTAKFQEVVNKLQLDVWKGKPSSGDVVDVSVAPEQLSAFEAATKDFETKIMHENLGASISEENTFSTYAAGAAPSATWFNSYHALADHYQWISDLAAAYPSNSEVISAGKSLEGRDIKGIHIWGSGGKGSQKAVVWHSTVHAREWITTMVNEYAAYQLLTSTDATTAAFKNKYDFYIFPVVNPDGFYFSQNSNRLWRKNRQTTPTASCVGRDINRNWPHKSWSQAQGASSSPCDEDYKGPAAGDGVETKALKAQLDSLAAGKGIQLYMDIHSYSQLWMYPYGYTCSGTLPNSASYASLTKGAIAAVKAVHGTTFTGGPICNTIYQVSGDSVDYAIENAKAKYAMTVELRDTGTYGFVLPA…
KZM26773.1	>ST47_g2095	MKYLTTIFALMSLTTLAMAAPAEPAHNSQLIARETQPWAPGSYCGKCVLQEGGQLRELRTSVPVNKCNTLAEDEHYSSCTNQYCGVCVVFKNNDCQGDVVHSGGPGAGSFDAKSARSYYCM
KZM26774.1	>ST47_g2094	MKTFTTILAFTGLSILAAAAPPGTQGSCGNCDTLPGPQTGGNAQIPLRSSANKSDGKAYKCTTFGNEVRISSCTNQMCGLCMIFEDNDCQGDILHWGGPGSAFEGKGARSYFCI
KZM26786.1	>ST47_g2068	MKSFAAITLLCAALAEVAHGHYIFQYLTANGVKGAQYQNIRRNTNNNSPVTDLASTDLRCNVGGGSGASTTTVSVAAGSSVTFTADQAVYHQGPVSFYLTKVASAAAADGSSDWVKIKEIGPTFSGGQSTWDLKDNYSVTIPTCVAAGEYLLRIEQLAIHNPGSPPQFYISCAQIKVTGGGSKTLTPTTKIPGHVKATDPGFTANIYSGFTSYAVPGPKVATC
KZM26793.1	>ST47_g2092	MRLAVRWFPLLLCCWVGRAGAAVDCAPSSGTFAINSPDDVATLNQCTAFTGNVTVAAKQIEDITLNGLKAVTGTLQITDVEGVLSISSTTLESVSTLILKDLPKLMTLTLPALSNFSKLDFTGLTALKGCEIATGAVQRDVHEVNIVNTALETMDWLKWPVASTLTIAANTKLTDFKLPYDRIAAGSSYQISINSALTNLDFSQLTGIYGSLMINGNKDSQLGFDKLETIDGYVRLSGPFTNITMPALTDINGALRAESSKNILSFCNWLSVQNRLFGHYDCTANGTNPPTASKTTVTTSRPTSAVTTTSASDGDNTSYNDESSLSTGVIIGIAVAMVVLISITLTASALFFRRRSRHKAQATAISEKGKTRSSSTLGEETNAPGVRYELGGRKSAREL…
KZM26794.1	>ST47_g2057	MYTSIFLASLVSLISLISSVSAAKALNPNLNAMLKMAATNYDRHALLAKDSDWYYDYFNHTDYDNPTGSVITADAATFPALTGFGISFALLKLGPCSMLPPHFHQRAHNLVMGITGNTTSWMINENGVRTVRIDIVPFRVTIFPQGSLHVMQNNGCEPALLISALNSDDSGTLNALNGLMTVPSDMVQASFGDENLDTAQLGKGIPGVGTGAVRGSPECLKRCGIEHGKI
KZM26830.1	>ST47_g2019	MFTKALLSLALVAPILALPAPLPMVISDTTKQKATSLCGVSDSVVLTDTPWIVFNMMYNQALTKGTQCTNYDHVATGSNGNKQITWSAVSTIDYVQSTNNVPKGYSFIGLTKNLETKLSAIKSIPATYAWTRTNTTAYKGNICFDFMTSDTQGDSTSSNAQELMLWLEYTGGQLPIGWAAGPKATVSDLYGTSWKLYQGKNADTGITVSSLLPDKQFDGAFAGDVREWLQALVKMGVFAEGTYVNVGNAGTEPFYGKAVVNATLGLQINL
KZM26836.1	>ST47_g2017	MRFSGIAVATLIGSVSATFKFGEQEALAAAGVFNIGLNAAFNGYPSPDTCTLKNVRVRREWSSLAKKEKLNYIDAVKCLHEKPAVTPSSIAAGAKSRFDDFVVTHVKQTYWVHGTANFLAWHRYYIWAYEELLRNECGYNGYLPYHNWAWWAEDVSKSPLLDGSETSIGGDGEYIAGRNYTCVGQIASCFIKLQPGQGGGCIKSGPMANWTANLGPIDTKWHNVPKNPSPDGLGYNPRCLSRDLTKDASMGATDKVISDLIKDSKDIRTFQNRVQGDFPNQYIGVHSAGHYTIGGDAGTDFFNSPSDPYFYFHHAQIDRVWWIWQNQDIKNRQYAIADTITFLNSPPSRNGTLDDVMSLGSMFEANFPNITQRDGMNTLAGPFCYIYA
KZM26841.1	>ST47_g2005	MFNPLVLLLAVGATLASAKTVTYNFDIGWVTAAPDGYSRQVIGINGQWPIPMIEADVGDTIVVNAKNSLGSQSTSLHFHGMFQNGTAGSDGAVSVAQCPILPGDSYTYTFVANPAGTHWYHSHNKGQYPDGLRGKMVIHDKAWESSLNIDQQMTHSMSDWYHRQMPDIINDYLSPSNTNGDFPSPDSILFDDKKQAPNIQIAAGKRYLLRIVNIGGLACGQFHIEGYQLHVVEVDGVQVQSSPADTIVICAGQSYGVVVEGKASFLGITANANYIIKMSTEMLTGAIPPIDDIIIIGNIIQSLLGDLLSIVTNILTFRWVPAALFDDFNLKPLDGEQLLSPVDNKIELSTNQTYYSNIGTRMALGSQPWTPAKVPSLFTALTTGSSAMDPATYGPGVNP…
KZM26847.1	>ST47_g2009	MARSFILSTALFALQAIAQTSSPYTDAKTGIDFRGYTDAKTGYTFGIALPEKPTTDFIAQIQAPITNGGGWAGFSMGQSMTGNLLVVAWPNDGEVVSSFRKATGYTNPAVTTGDFTMNPIPDGTFVNETAFSYTFLCKNCISEDVATGLVIYDSPSTNIVGWAFSDDPLTDPATASSTLTYHTAGFGAFGLPMSNATSADFETWAAMAVEGSTGSGSDSGSGNSTTPISGGNSTTPVASNTTATIANATYDYIVAGAGPAGIIAAERIAESGASVLLIERGGPSYGFTGYSDNLSWNDTVSMYDVPGYGYYLSDVGTPAYCDDTADMAGCLLGGGTSVNAMMFVRPQDRDFDDKWPTGWKSADVSAAAERVWERNPGQTHGSEDGKRYNDESYDVLSKV…
KZM26852.1	>ST47_g2026	MKAFILTAFAVLVSCCAAQNFFEAADFNVTEALLQQGVDISALPGLAALVERSTDQACSCHSLSILPGFTVFFDNSTTYTNFTNAYWSAQQAEVNPYCIVKPSNALQVSNIVLISRLTRCPFAVKGGGHAAFQGASSIDGGITVALENLNEIKVATDKKSVFVGPGNRWLGFYTELQKHGLAVVGGRVNDIGVPGLTLGGGISFFANIRGWACDNVESYELVTASGSIINVTQKSYPDLYWALRGGGNNFGIVTKFQLHTFPMGKMWGGSKLVPSSDYEKALDATYKFGATGAANDTKGSQIISFGYQAGFGPLAQAFLTYAEPNENPAMFNDWKNISTIVDTTGIQTLPELTSLLSEGIPDGVRETYWDVSFKLDRSLLSFVVNTFNELLPDILDAKD…
KZM26854.1	>ST47_g2025	MRHLTPQHLWILLASTLLAAPPPARAKFLLATTPANSSDVIRSAYPLGNGRLGFLAHGAPFVEVLTLNVDSLWSGGLFEVANYTGGNPSASVAGSLEGGRSWVFENGTGNVTGLLGDDRFYGSYRVLGNLSISVPEQQRGGKTEAAGYRRMLDLASGVLTTTFSADGRDVETSAFCSYPDQVCVYAIRSEALPALEIRLGNELVGSMLQNVTCFDGNGYGNETAHVRLRGVTQLGPPEGMRYDAIARIVSGSSVQTSCTNSTGTLNIVPGNGTTSIAIVVGAGTNYDAKKGTAEFGYSFRGEDPGPAVEANTRAAAAKTLENLLKSHIEDFLSLTGCFSLSLPDPLNSAETPTSELIARYNAKDTTGDPYLENLLFDYANYLFISASRPGSLPPNLQGR…
KZM26871.1	>ST47_g1988	MLHTLHFFIGLGILGSLVHGERTCRVRSDTIMVPDAVSAQAPYGSTGPFKLGIRQPWPLVNRRQSTASGSQANNLGYPASAQNGHNLAWEEASDGNQDLGKRKMEYCYKNYKDVEDIGTWNSLVDPGTLVIALDFDPSAIGGEATIGYNIFNSDPDRHHRILGAQPEVELVAHEIGHVLGMSHEALRDDRDECVLYQCRNVVGFDAALAKAISGGLTAADARTKLCEDGRYALENGFDGWQYTKNLRGRDLSDSADFDLIFIMLYDSESFANEWCLIDQTACPLLQLVKVNGMSVGLEKISRKSEPSAGDIAWLKKWYPWKP
KZM26873.1	>ST47_g2000	MLLSSLFTVLTGTATLVLCQATNKTAIRPNPPHGHWVDAWASMPQLTEPANLPPAPFNQTGAIFVNSTIRQTLYMTTDASQIRIKLSNVFGGSNLPVTAVTIALPANNTAGIHQIQAKTLQKVTFSGKDSISIPNGALAASDPLDFPVKAQQVITVTVYLATGQTTNSITSHPGSRTTSWWQFGNAVGAGALDITDPTTQSAAHWYFLSSVEAWVPKGTGSLLIVGDSITDGRGSETNKNNRWPDLLLARLQKTLATKHISIGNLAAGGNRILADGLGPNALGRIDRDVLAHPGVKYAMIFEGVNDLGGAAATADAQSAVYDSLVQAYKQMAALIHAHGIPVFAATITPFSAPSNFTGQPYSSPVREATRQKINDFIRNSGTFDAVADFDKFLADPNIP…
KZM26881.1	>ST47_g1978	MKTTTFIAVSLFSFSSTVLSAPTPQLSNILGSIINPGAGNNNVFEGNGNQNGNGNGNDNSAGNNNGNGNVAGSGNKAGNGNTVTFPSILKDRDLGSGLTNILGSITNPGAGDNNVFKNNGNGNGNKNGNDNSAGNNNGNENTAGSGNSAGNGNTVNFKERGLLDGITNTIGSITNPTAGSGNKFLGNGNGNGNGNGNGNSAGNGNGNGNTAGSNNQAGNGNSVNVSPDVSPSIALPDISLPDITLPDITL
KZM26890.1	>ST47_g1973	MLFTRPWASLCLLAGSLAGVSSLGLSEDPEIKAISLRTHSLEPPYLDSDMQSRWWDFGGDTIIRTDQYIRLASDKPSRDGWLFSRVPLTATNWEIVVEFKVHGQGNLYGDGFAIWLTKQRAQRGPVFGHADNFEGLGIFVDTYKNNRPGTVFPYIMAMSGDGKTPYDKDNDGKANEVAGCSARGIRNSQVPTKARMTYFQDSFFKLDLQYKSENEYTTCFEIPNFKIPPVAYLGFSAETGELSDNFDIVSVRADNLYKRNPGQAPASGNTKPGKTASSMTGEQESGSWTWLLVKFVLLGLALTGAYVGFTIYRTRQRDRF
KZM26899.1	>ST47_g1991	MVALSSILFALGSAITAFASPLNLILEAEAADAGNLTARSTPAGTGTNNGFFYSFWTDGQGSVNYNNGAAGKYNVTWSNVGNFVAGKGWNPGARRTVTYSGTWNAANVNSYISLYGWTRNPLIEYYIVESYGSYNPSSGATKKGTVTSDGGVYDIYQTTRTNQPSIDGTATFQQFWSVRQSKRVGGTITTGNHFDAWANVGQKLGTHNYQILATEGYQSSGSASVTVQGP
KZM26903.1	>ST47_g1953	MINVRNLAVFLGALLPAVLAAPAPITKKDDIIPGKYIVTLKPEVDAAAVESHLTWVNDVHKRSLKRGTAGIEKNYEIKDWKAYAGEFDEATIAEIKASPDVALVEPDTIAYLWYDVEEVHEDKLEKKALTTQTGATWGLGAISHRSGAPTSYIYDTTAGEDTYAYVVDSGILVAHNQFGGRATLGYNAVGGTHTDTLGHGTHVAGTIGGSTYGVAKKTNLISVKVFQGSSGTTSTILDGFNWAVSDITSNSRGARSVINLSLGGQASTTWTNAIQAAYSQGVLSVVAAGNGDQSGNPLPVSSQSPANAPNALTVAAADSSFRPASFTNYGAGVDIFAPGVSILSSYIGSNSATATQSGTSMAAPHVAGLAVYLQALEGLSTPAAVTERIKALGIASRIT…
KZM26905.1	>ST47_g1951	MMHFSTLLAATALAGSALAVDHKVAVGTKTGDLVFKPDSITAAEGDTVTFHFWPKNHSVAQAAFNSPCAPMNNGFWSGFVATTDTENVADSSFTYEVTNASAPVWFYCTQGKHCQNGMVGVINPPATGARTLAAFKNASAEVASNVSPTVKAGTGGNLTENSTSTSPSGTASGTASGTPASSTGAASHLSGSVTFAGLAGAFAYFLMTTGGVSTLSDAFEKDGTAEEDMKRLA
KZM26906.1	>ST47_g1950	MKFSISAIGLGLASLTSAITVSYDTGYDDGSRALTALACSDGANGLITKYGWNTQGNVPGFPRIGGYQGVEGWNSAQCGTCYGVTYNGKTVYVLAVDHAASGFNLAKQAMDELTNGQAAQLGRIDAQYAQVATNNCGF
KZM26912.1	>ST47_g1945	MHAILYAILGVVVILVLGPAVFADRSPIPETSGNVTKINEPAQLETVLKSNKYVVVDFYADWCPPCRAIAPVFSKLADDHAVAGQLGFAKVNVDHVKDVAKKYGISAMPTFMFFESGEPAQVKIEKHGAEEVVEMVRGANVALLRSVVQEMAKKSLSS
KZM26922.1	>ST47_g1933	MLSSAILAITALAGSAAAHYKLLEPTWRGDSFEEPASQWIFPCGNVNETTDIANRTAWPLTGGSVSINGSHSSALTYVNLGLGTNVTNFNISLVENLNQTGAGVFCLKEAGRANLEEGLKAAGYSGFQDERLNGLKASVQVIQLGHSGSALYNCADIVFNSTAQLLADDQCVNGTGVSAQEIGNLEEHATNTSSGATPSASKGAASMLKPMVGSSLIAGLLAWSLL
KZM26923.1	>ST47_g1932	MQYKALIAGLMASAASAAPTPQDSSDIVGGTTAAAGEFPYIVSLRQSGSHICGGSLVDSRTVVTAAHCTVGQTASSLSVRAGSLNRNSGGTLVSVSSIKVHPNFDESTLNNDIAIWKLATPISTSSTIGYVTLPAANSDPASGSTTTVAGWGTTSSGGSSPTTLRKVDVPIVSRATCRQNYSAAEITDNMICAGLTAGGKDSCQGDSGGPLVSASSSTLVGVVSWGNGCAQAGQPGVYARVSTLLSFVNSNLG
KZM26926.1	>ST47_g1928	MRFISFSIAAATAFFTLASATPMHGEKRQTSYVGYLISTFSDVNPKLQWYLSNGNSPTSFTKLNKGNPVLTSTVGTKAVRDVFLASNGARTQHYMIATDLDINASGFSWDKATRTGSRGIVVWKSKDLVNWSSASLKSVEGATAGMVWAPSAVWDDTTQQFYVFWASRLYASSDTAHTGTAGLDRIRYATTKDFNTFSVPKDYVAPSDTPVIDQEFQYLGQKGHFTRFIKNETALQVYQENTTGGLFGTWERVPGYVTSGSPWEGTASFADNTVAGKFHILLDNYVQYAPFETTNINGGNWTASSTSGFPTGLKHGSVTQLTQKEYDAPFTYGWTRWLPGKKTVDARNADVTLRLLEKHDHEFGVLTPEKEKQLRRTLYWRLMTLLSAINIIDKSTLGY…
KZM26938.1	>ST47_g1874	MKRRPLCTSASRVTASLLLSFLAVSSAAEVPLLPLLPPTSPHAHNTDREFTLRHIYHHGTYKYPDLHRRLDVPDKAAVWMADYDGSPTREPVPVLRAKSEMMSIERMVHRDRATIDGILDYGRMRGKAVQLAADDWTIDQLPGPNVTDRETVLSFARMASNAYILEPNTGEWEDVGGGFNYTEDFGWESDGLRGHIFADTENATVVIGLKGTSPAMFDGSETTTNDKINDNLFFSCCCGQGGQYLWRQVCDCQTAAYTCNSTCLVTALREKNRYYYAAQDLYHNVTALYPHAEIWMAGHSLGGAVSSFLSLTYGHPTVTFEAVPEAMPAARLGLPTPPGHQVGSLQKRKMTGGYHFGHTADPVFMGQCNTATSVCTIGGYAMQSVCHTGQKCTYDTVKD…
KZM26944.1	>ST47_g1908	MLKSITAVAACAATFVDAAALLPRANSTKKLVTSEALRHLLDIDNLYAKAEHLQEIAYSTEGKNRVIGSKGHDDTVAWIKETIGQFPDYYTIQLQGVPLLVGVSANLTANNKTIEVYPVTLAPEGDVSGPLVAIPNLGCEEADFTESLEGKIALINRGTCSFGIKVQLAAAKGALGVVAWNNGEGTLEGYSLQVFEDPAKPYVPVGGITLGQGESLLAQLQAGVDINVNLKTIVQNATSYNVIAETIAGDHDNVIHVGGHSDSVTAGPGINDNGSGSISLLEIAIQLTKFSINNAVRFSWWTGEEAGLLGAEYYVKQLSQAEKDKIRLFLDFDMMASPNYAIQIYDGDGSAFNSTGPAGSAEAEHEFAAYFDNLGLNHTEIEFDGRSDYGPFLEAGIAA…
KZM26953.1	>ST47_g1889	MGRQTLSSLALLLSLLASTTNAASDPPRPRGVGPDFAKFYKDTETFTCISNPSIKLDISRLNDDYCDCPDGSDEPGTSACSYISPLSPPQPSTVKLGSFDENLALPGFYCKNKGHIPSYIPFTNVNDGKCDYELCCDGSDEYEGIGGVKCPDQCAKIGKEWRKQDEARQKSLNAARQKRKELVAESGRLRKEVEDRISTLKAQIEGQTQKVDALTKSLAEIERAEKGRVVKGAGKSGKVTVLASLAKGRIQELTEIVERVRRERDAAKGRIDELEGMLKRFKEEYNPNFNDEGVKRAVKAWEDYAAQDWPGPDAARDRDLDDILKPDSESAIKWDEFETVEESDVDVLYQFENYLPESVRTWVDTKLRDLRVTLIENGILANPNTDSPESKAVTDAKTQ…
KZM26959.1	>ST47_g1885	MRFSTFAAFATSLAIVSAQTPDLSSVPDCAVACLIAAIPGSGCGVSDVTCQCTTGQASITSSLGSCIPSRCSVDDSAKVAPALAGVCSAAGISVSVPASATASSAAASVASSASAAISSAASAVSSALSSAASAASSRVASASTTGSASHSGSASATKSGPAQSTGGAVANVAGLGAVMLGVFVAAL
KZM26968.1	>ST47_g1893	MLYTVSLSLLALPVAQVLAEPTPSSTPAPVNVTTCNGRTYTYSALAGYGKLASDARDKFGDTIGGIGSAIALDKKSWKSKKGKTEAYQGIVYGLPDRGWNTQGTQNTQSRIHKFGFDFEIVDATLEKPASPNFKLTYLDTLLLTGPDGTPLTGLDPTGNITYKGFPSLPLAIYTGDGFGNNGTGGSRVPLDTEGLVLGNDESYWISDEYAAYVYQFDKNGKMIQAIRTPDAFVPLRNGTESFSAASPPIYNQDFEISPKDPSTGRANNQGLEALTASPDGKYMYTMLQSATIQDGGSKSSTRRNTRLLKYRVKTKSVELEAEYAVQLPVLSNGKVAGQSEMHYISDTQFLVLARDSGAGHGQDASASIYRNADVIDISNATNIKGKYDDFNVQIASSKG…
KZM26986.1	>ST47_g1846	MAKTDAFRICIAILLFIQFTCWALTLLDLLSPGRPTMLLRTSTHIVSQVFAKQQPAAVLLYKDFRSRMLF
KZM26992.1	>ST47_g1798	MKFSTTLFFFAASLVSAVPTPTLEESPAKLLAKRASVTDVANVGYATQNGGTKGGAGGPTTTVSTLPQLSAAASASGARVIVVQGAISGAAKVSVTSDKTIVGKAGSSLTGIGLTILGQKNVIVRNLKISKVLATYGDAITINLSTNVWVDHCDLSGDENVGKDTYDGLVDLSHAADFVTVSHTYFHNHSKGTLVGHSDSNAAEDTGHLRVTYANNHFYKVASRGPLLRFGTAHIFNNYYNEQDTGVNTRMGAQALIQSTVFENSGKKMVYTESSDKDGSAVVIDTVFGGQSANTAPKGTLSAGSFTYPYTLLGSANVKAAVTKEAGQTLAF
KZM26999.1	>ST47_g1793	MLFSLPSSLSALTYLLSFPSANAYKPLSDSFLKAIPSPGDLFDHEHGELLAPILIPRVPGTAGQTTTQQHFVSYFQRELPKWDISWQNSTATTPTSGGKALPFQNLIFKREPPWVKPGQSNLLTLVAHYDSKIAPKGFIGATDSAAPCAMLMWVAKVVDRHVQRMYDEMQALEEGGTVEMDMGIQILLLDGEEAFQAWTDTDSLYGARSLATEWAATRNPPSSKFYQYRTPLSQISLFLLLDLLGSASPNVPSYFPTTHWAYRHLSTVESRLRSLEILESKPSTLFLPDVNMTMAGYGGISDDHLPFIHQGVEVLHVIPSPFPRVWHTMQDDGAHLDGATVRDWARIVAGFVLEWLDMMEVWDEPGADGTMLVESAERSADSEVNADIGGIGILLGLFL…
KZM27030.1	>ST47_g1864	MLGPSSVLSLLALASTAFSAPSGNIEKRAPTVYLAGDSTMAKASGGAGTLQAGWGVYLPYSLSVSIVNKAIGGRSSRSYTVEGRFTDIVNTVKANDIVIIEFGHNDGGSLTPTDNGRSVCSGASTQTCQSTYNGVATTVYTYPFYLIQAGKALIAKGAKVIISSPTPNNPWESGTFTYSGSRFVDYSKSVAATLGSDAFYVDHGAYAADAWKTLGKAKTDAYFVSGDHTHTLPIGADVVAKSFVKGLQCAGGGFLGEFVKNSTASITGKCL
KZM27033.1	>ST47_g1861	MAPSTIWLTAVLAASSSASPLLTRRDLDVLAEADLEGITSSVKSLFLQSSGAPKNETSRCKVYPGDAAWPSDEAWSQLNKLTDNRLLSRPTPLAAVCYPSHPDYDAEQCATYSATWTQSYTHMHDPIEMIHNCTRGGFPAYVVNATEPKHVQLAVNFARNSGVRLVVKNTGHDFLGKSGGKDALSIWTHYMKDIEYIEEYADGELGYSGPAFKAGTGVQAFEIYKAADEKGRVVVGGEGETVGVMGGYIQGGGHSPLTGLYGTGADNVLAFEVVTADGEFVVANSTSHTDLFWALRGGGGSTFGVATSVTVKAHPDLPVTASRFSFSSKQTGNETFWSAIRSYLDINIANADAGTYTYWMIIPSNGSFTFQFSPFFAPNKTLDEATALLQPWFNKLDSL…
KZM27043.1	>ST47_g1782	MMLYTLSVLTVLAATATASYDGNINFKSPSFDHPSMGIDVPKVMKRHLQKRDYKVTIDPSKLNFTHGVASGDPYPESVILWTRISPQLENDRSNVTVAGTVPLYSHETEGYIRASTSPICVDYQVSTNKNITGGVVSQGRAYTTSDIDYTIKVEATGLSPYTTYYYRFNVCGSSKQSPIGRTKTSPSEDDDTTEIGLAVFSCSNYPSGYFNAYGNVARRDEVSFLVHLGDYIYESTSGILGQDARATNPPRTIFTLYDYRTRIAQYRTDLDLTLAHQNFAWITTWDDHEVSNNGYRDGSSAVNNTESSFIRNGGVSVDQRKMNAVRAYFEWMPIRQVNLDDNLRIWRNFKMGKLFDLVMLDTRNYDRSITDLSWNTDYVTSIRNDAGRSLMGSNQENWF…
KZM27052.1	>ST47_g1815	MRSVSLVVNLAIVTLPGLVSAANNIKMINRCPYDIYSWSVGPVGSGFNGHDHEALTIPANSVTVHGMINTEAIGSGIALKFRDLSKYEVAPAGIIQVEYNLEPSKNNLWYDLSAIDCDRAAGPESPSFCPLVGGGMKLYVAEADEAKCPPAWCGADGCHNTYTRRGSWKGEPTFRCNVGVDIIIEMCTERAGARTFNGNTEPEHAVDSNPDVKAGGTTQNGVCGARDPFGATCFGYTHGNCCSSYGWCGFSEAHCGDGCQAGFGDCFSSGPVYQPPAQLPAQPSYSNPEPNHVEAPPSYAQPTPDHVQPTHTHHEQTWPIPSYDKPTFKYAGPSTFLTSYIKPTLSHSKSASVYSAPTPSYNAPGSSSTPPVHTKPSHGPVYTPPAYTPAYPPAYSPPP…
KZM27081.1	>ST47_g1776	MIKTILLIIVTIFLPPVGVFAVAGCGADLLINLLLTILGYIPGHIHAFYIEYVYYKRRDEIRAGTYDGTRAPGVYSQKVQNGGTKGVAVRSAPVAGDVPPAQQGYGTATV
KZM27083.1	>ST47_g1774	MRSFLLAFPALVTAYLAYAPAEASGALQNILKNTDKTDKYRYPTDFTRDIEPKPFHSHNDYWRDVPFYSGLAAGAISTEADVWLIDGTLYVGHEPSALTKSRTLESLYINPILDTLHRMNPGSPFLPDGSSNGIFDTASFQTLYFFIDFKTAADELWPAVLQALEPLRNGSWLSTYDGKSFSERPVTVIGTGNTELSDVRKYLPRDVFLDAPLAQLGEPKYKDLTSNEAVIASTNFAATFGEMRKAELNDTQLAKLREQIDVAHQKGIKARYWNQPNWPIRTRNAIWRTLWEEGIDLLNVDDLKAAAEFWKGE
KZM27094.1	>ST47_g1762	MVHPFSLLSTVQLVLTARNASAAYDYVIVGGGTAGMLLANRLSANPRITVAIVEAGSSAFNNPNVTYVPKSIAEFGLGFNTSVEWGYTTEHQKYAANDSLPYWAGKGIVGSTLINGMTYVRAEKRQIDAWEELGNEGWNWKSLDKYYVEQESFLTPSEQQRVNGATFEESAHGYEGGLDVGITPYITGQRAFDVLRETHEAQGYVWNKDVNTGNMPGFCTWPMTLDASKVVREDAARAFHYPVQERPNLHVFLNSTASHILWTDLDDASDRTASGVQIVRSDGTMRTLQAIEEVIVAAGSIRSPAILELSGIGNPSVLRSLGIETVVALPSVGSNLQDQPANGIVYSSPTNWTGYSTFASFLTASDLFGPDLSSVTASVKANLTSWASTILSDYVPNAT…
KZM27095.1	>ST47_g1763	MLVSTFWVAFFASLTSAQRTNCTGVNAISPNCHTAEVPYTRDFFYVGGRPLESATGELTADKLYVEKINPVSGARKSKPLVFFHGGGCTATSWLNTPDNRKGFASYFIEKGYVVYLVDSASVGRSTSADFATFPMTAGSSSLMIEQGFTGVKHANSYPQSQLHTQWPGTGRAGDPIFENFKKAMVPYTSNNTAFENALRNSGCQLLKLIGPSYLIAHSAGGATNILLSNDCPQYVAASINLEASTTPFTWYTVGTGSIPYNPYGLSATPLDYEPPISSPSELITETVGNATTALRQCVQQVEPARKLPNIASVPYLMITGEASVHITYDHCIVNYLKQVGADPEWIKLSEIGIKGNAHFMHLEKNNGQIADVVLKWIAKRE
KZM27106.1	>ST47_g1756	MAFSLLFSTALLSVLSGISCAIAEDVKCGCGSSLPQGVELDKSVNLTISSASGVSTRAYRLHLPRSYDTNTKVPLILSFHGRGKDAKFQEELSQFSNATYEFKGISVYPEGIPTPSGTQQWQGDPDFPSSIDDVTFTLELLDQLQETYCIDPSQIYASGKSNGAGFTGVLACDAKATERIAAFAPVSGAFYLNAGQQLPPCNPSRHPIPIMEFHGFKDTTIPYAGGSNTRGNANSTDVVTWVDDWAKRDGFEIAANKTSHLCSGKQLVTRYSWDETVVHYNYTNLYHDWPSSFPNGDTEKALTCEEAEATSIILDWFKNWTL
KZM27111.1	>ST47_g1744	MLFSKSFVVAFGAQAVTLPLLPRAEATKQDEAWCVTYRALQSSVFHAHLNHKKIAKRDNAVEQNEVWKISKRAEQD
KZM27124.1	>ST47_g1736	MKFSQIQLAALVASIASAQTLNIPTRVGEITSLPSPSTITGSEDYGNKEFDRGQPCDSDEDTGSDNAVFVLEDGASLSNVIIGADALEGVHCLGACTLTNVWFRDVCEDAISVLGTGDATIIGGGAQEAKDKVVQHNGAGTVTIKDFTVVNAGKLYRSCGDCTNNESKSPRKVIVENIRAFGMTSDLIGINSNFGDEATISGSCGETKNVCQEYKGVNKGSGSSSKVDTKTSCKGAQGTLETLPACGADDELPEPEVPSGTASEAVPSASATPTDTEVPEETTTPTPTEAEEAPEETEVEEEGEEEEAPITTAAPAPSTLLTLTKTSEASTPTEGSSGGSVARWGQCGGQGYTGPTACAAGECTVQNPFYSQCL
KZM27126.1	>ST47_g1734	MPPHMHPRSRMTASLFTTTLMVSFLVVAAPHLIPCPVDPRTLNDSADPTRKRRRRRIPEPEGDEATDALSNEATRKRIEDKFSPKRECPIPRPGGLVGQVLGMTTREDVPTPEPISISKHVQQTLRSTRESDDP
KZM27128.1	>ST47_g1732	MRSFAVIAAALPLIQAIEPPRFPHQPLGSSNSTTRLNYNITTDAPGRLTASTRAFSWVSTGADGDYIYTGTDGSFLFENVATGESSTFLSAEKVPADYWDYFISGDASHVLWAVNYTKEYRHSYYADYLVQNVETGETISLDPESNGTIQYAEWSPVSSSQIAFVKGNNLYIWNDGNVTQITENGGPDWFNAIPDWVYEEEIFGDRYALWYSPDGEKIAFLSFNETGVGTFRIPYYMDDAEVAPVYARELELRYPKVGTKNPTVGFHLLDVASGEVETVAIDAFPEDDLVIGEVNWLTDAHSKVIYRAFNRVQDLEKYVVVDVEAGTSSVVRERDGTDGWLENLIATRYLGAVQTANASYGNATEYYLDLSDESGWNHIYLFPVDGGEPIALTSGEFEV…
KZM27132.1	>ST47_g1741	MHQTSKMHWTTVISVALGLSAVADTAAVGHSRRVHENCPSLNGSFSLDIYQLYPENSAFDPVGCKLYMSSIYNASVVVYDIYTTKHQVLTFPGITDTEPYHMAGVDYDASSGAMFFTATSGLGFETNGVDLSGPQKVIKWNTTTMETVYIADLAPFQEQFERTFGHATAGFQDIAEDSHGNSYAPASFGGYSIAKIAPNGTVTPFFTTNETAKNATALPYLSSGLVYLPSKSKLLISDGQRGTFVTFETKSRHPVPKLTKISNWPSNYTALNCDGIIAPDRYPGQTVVLCAEDYLGGSGAITVFSSKNDWATAKYLGVVYNSNPSTKGFLTTTAVEITNSIYLNSMPFSDGTTFDTHGNRSSFPIIDITSQVDTIGWLLVAVLAQAAPTDVSYKNHRSD…
KZM27135.1	>ST47_g1720	MRLLSLLFAAGAAAELSQVPFQNTPEVEGFQVYQSQFSEHHSIRIKQQQNDTLCDARSKQYTGWLDVGSKHIFFWYFESQASPSEDPLVLWLTGGPGGSGMIGLLQENGPCLINEYGNGTVYNKHGWSKNANVIYVDQPAGVGFSYVDENVPLPGTSFTAAEDMHHFLQLFTSDVFPKLHGNDFHITGESYAGHYVPTLGAQIVSQNLLYPKRPQVNLESIFVGNAYVSPLDTAFGYWETLCTTNPGVETPIFNQSRCDLMATHLPRCLELARVCYDHPDPAICLAGEEVCWNGVIVHYDGESGAGGRNRFDITHPCETGDDLCYPEIQKIGEYLNLPWVYEALHVSKVVGNYSVFSEEVAIAFSLTNDLGISTQPQVLYLLENGIDVLFYQGNLDLAC…
KZM27147.1	>ST47_g1683	MNTFRSLALAAVVAGAAAEAVNNGTPQGEVIKDLPMIARDGTCAKLPKLCTARAVIDDYTTTLTYLCPEAATTHERSTVHVTITKTVTVTPPDAETTGSLTGTVVAPVPAITDTTTTIHSTLTQYKTITLVGHKGSPTPTNAVPAPAVPITGYFSATMPTELLSVAHPPPTETKEPVYTVQTSTPAVTPTPGYDFPTMLPPVINGTTTGVFYSAPIANSSVVHPTPFFSNTTSAHPHYSVPTLNMANRDAEILKTAKGTAGKVGASLVALSFGLMVNAFLV
KZM27150.1	>ST47_g1680	MKREMLLFLAFLSFLSLSLAASPTSFCKCTCFGNSTIVALDAPSTASKPTLALRPRASKKSCSDCNRQFCLGYSFCKGEKEDKVLTTCFQRDSTKDQVVVLVFIAATAGLLAYAGVRPWVDQWRERRRSYMPVPGQGNR
KZM27161.1	>ST47_g1670	MHLSHFTILIALAIGASGISKPYTALDPAHLPDRLIALEEHVISPSLEAEATASGDFQLGPPGIFEKLKDVGAGRIAAMDAGNLSIQVLSQLPGSGSEDPEGCRKANDAVRSAIEAYPTRFAGFAVLPMGHPEEAVAELERAVTRLGFRGAMIWNHLKNGTYYDGAPFDALFAMAEKLDVPIYLHPTAPTLEMLQTLFVGNYDAQTTDALSSYAWGWHVDVGTHVLRLYSAGLFDRFPKLKLILGHNGENLSGFIDRIDGTDLRSNSTFDRVWNTNIWITTSGFFSVRNFQQLRLVTPIERIMYSVEYPYHSMIDGWEFVQKLVESKVLLGGEIDLFAYKNAETLLKL
KZM27162.1	>ST47_g1671	MRSQALFVATLASIIALSHSYVLPPPTSPFNVGSKAYVLPKIAVDDPKAPNAQRFSVKICLKRYLQSLRRVLRTSGTFRNIITRTSYNAESLPSKEWRTLELPTLIFSPSFAGPPSQLFHALFSDLVSQGYTIVTMDHPYEQPYFQLPDGTGISDLPFDYDTDTVEAQELLQRVHDYRLTDDSAVLAALPSISTHLSIPLNTTHCSLIGHSLGGSAALGQILHKRAHTTNRTHQIFGALNMDGSLWAPASTNDSSADLRIPSLLLSSSGPKGDPLFADFDALQSAWAKEINIGARTNHTNFSDLIILKQGLGIAGGEGAVGADRMVNITRTLVGSFQGLVTSKSEGVLRGTDEIRDA
KZM27179.1	>ST47_g1704	MRVRTNSAWQSIAVLLLLVGAAQASLGDRLPDFKHCLEVCKEANCGDNPTPIPFHRRVLFWDCPAECDYTCQHVVTTKRLARDPPYMQPVYQFHGKWPFYRFMGMQEPFSVIFSLFNYLAHNWGMAQLREKIPASYSLRKYYLWFGYVGLASWTFSMIFHIRDFNITEKLDYWAAGANVLYGLYYAPIRVFRLDRNDPRKQSVLRLWTALCILLYVMHVAYLSLWSWDYTYNMAANVVVGTLANVLWSGFSYVQYKRIGRTWAVLPGICVAWIISAMSLELMDFAPWKGMIDAHSLWHLGTVMPTILWYNFLVKDAQEDIAGTRIKQ
KZM27188.1	>ST47_g1659	MLLARLLLLPFAVASTVTLFVSSVPVSEDTAVIPSAIPLAQIEFDADQSVGTLASYTPPTGSYSADHLLRVGLTDPKTGSWRGIVTSAASFADKYHKKFVVHVDDKGEPYHVGFGTSARGTGEEVEVEIVKRSPGPKPVLNKPIVLNAEGKLESKEPEKTFLQKYWWAIAIFVVVQLVSSGGDGK
KZM27191.1	>ST47_g1668	MRSLSLLYLFAVLQLCQAFVSPDIYSLTGPVGASADLGEDSQSPTVPSESRHTAGANSGLNIFLPDYEADPNWLPLTLSLKTVGLQVKVIQSLNISSQCQNLLVYTSPSVSYSPSAADVTTLTSFVASGGRLIFMNQIPDALQALAGVSASTVDTSGSRSVLQLTDTETPVQALQGFDFTEFYDVNMPFYDNYTESGLINVGYTPVSGSQTLGRYLVRNNGVDSVDTSAASAAIVKHQPSGASGYVYSFGMDLGYLFIQAQNEGGGYSPWYDGHYYPGYDIGTRVIKNIVTTSPHFVSLWTVPYNKGLAFTTTWDIDTYVSYPHGQGMAAAAQDRGAAGNLNLHTKYITDAYENAYFQYGVPYIYQISGLRVAPDGYPYIDFGSHTVSHSPSAAEFSYG…
KZM27206.1	>ST47_g1616	MSHRTAATALLLVSLPYGLALPQIIPVISEVTRVPKPLTLPYEPGYESPTVTVVGTVVDATTDPAALKTVADTESDALPEDALPTLDAVASILPFILPGILPVETDLPPIDTPDVDPSDLPILDPGIGNGTFPDDDLPDTNDLEVIDLPAPSEVPYDDDGIIADPLDPILSDPVPDFLDFPDFPDFSDFPDEKTVPIGTFNAVIQPLVSVIQTLLNALPGNFAPPLPSIFIHPLLPTETPDIFIDPLLPTETFDDAIVATATDAIDSLLDSLFDSIPSIADSVATDLPFAKRQLPDESDESGIRALIGPILDAIKELIAQIPGLGPAVADAVSDIEEVVPSVVDQLVDVPAVDTQLPIPTFTIPAALLPTLPADLPIDVPAIPELPSPEITLPSLPTDV…
KZM27230.1	>ST47_g1644	MKASIVAAAALVASVAAFEHKNHAGFHMRRGAYEPKDEVCTVYTTVYVHALPSIVPNTTTIYEHSTPAAETSTSCTEGDKASSIYTPIVISTKTPEASQPAYPTVPVVPESSKPAVPVSSAPVVPASSAPVVPASSAPVVSASSAPVAPVSSAPAVPEYPTKPAVPKPSKGVYPSAPIAESSKPAPQPSKPATSEYPTKPVDTPKPAPSSSKAVDTPKPAPSSSKAADKPKPTGSYSSGGRIVTNGDKWAMTYTPYAPDGNCKTEADIKSDIKIIADLGFTTIRSYSTDCGVFEYVVPACQEHGLKIIYGIFLEAGGSGGKGPFSQYANDQLDDIKNNAPKDGVAMVIVGNECMFNNNCAPAELASYIDHVREQLQGAGFPKDIAITTTEPVGTWEEKG…
KZM27234.1	>ST47_g1626	MRDAFVSLLASRAGKLALSLLFAQSARALTFTPVPSPNLNLADLGRVAFAGDFDSISIYQYEGQNQANTGRTGALLSRYPNGLFAPINETDADIKAMCAFTLNGQDRIIFAGNFTSVGDLATPGGVALLEPTSGNVTAIDGLTGAVNTLYCDGDHVFLGGLFTGSNSSNAIIWKNGWQDLSFEGFNGAVHSIQKAPNGNIIFGGEFNGLGGNATVATENNTQTIPISNARISAQTSSGLPGFTEPTDITCKADFTTQGSGSTWLLSDRAPGFWKAEFGFGFRPTSLRLFNTDYEGRGTKTFRYTALPDGGIMNLTYSDPSSGRPAFCDARCPLPEANTTAQEFSFVNVVGMNAFRIDISDWYGDGAGLNGIELFQDEMYSYAINEFNEPGSCSTATSVQ…
KZM27240.1	>ST47_g1628	MKHLAAYLLLGLGGNTSPSAADVKAVLESVGIEADESRLDTLISELEGKDINELIASGSEKLASVPSGGAGGAAAASGGAAAAGGAADAPAEEAKEEEKEESDDDMGFGLFD
KZM27257.1	>ST47_g1595	MVSQLILALTALQTLASATPSNHRQRSSGLAITSLAQTGNATNGTGNVAAAGTLPPFGDIGLGCGINWQSDVSYGGGLQAGSNDYGLGTGATVTPEAITIGVGIGLNAANASANIQFVGAKNGSFELVFESSAPLVCLQDKKNGTYSISCTTV
KZM27266.1	>ST47_g1594	MKLEILFLVTLLCLPGYAKPTSSRKTCTIKASGTNQTDDAPAIRAAFQECGRHGKIVFRPTTYYVNSVLNITDLEDVDVDVQGHLLWSTNIQYWLNASLPVGYQNQSTAFVLGGNNVRIDGHGVGTLNGNGDYWYQWIKKQPNTSNYPGRPHQLTFNGLTNSVVKGLNFLRSQMWTVSIIHSYDSVWEDIFINNTGNVVSSSNTDGADTFFSSNLVFKNLTVYNGDDSFSAKANSTNITLLDSHFYHGLGIAIGSIGQYNDQFETVESFHAENIYFEDTLHAFYIKTWTDDRVGYPPNGGGGGLGFARNMQMRNLTVKNARGGLFTVSQCTRFSGAPGVGNCTNSQFQVRDVNIQGLKGTTKDRRVVSLQCSAVAPCTNIALSDVDVRFAGNGTTLDNY…
KZM27282.1	>ST47_g1566	MYFLLASAALATSCSALTLPWGSRATVSGLLPPLPLDHFDTPKYARPLSLEEALSGANASVTTILDLQDAKNKFPPLVIPTNLKLPGSAHDLAEALEGFQKRQSTCSNVRVRTEWDNYSNSDRQAYIDSIKCMMKKPPSGQFSVSRNRYDDLVGLHQTLTPNVHGNAKFLLWHRYFVWTFEQLLRDECGFDRELPWFDETRYAGRFADSSIFSPQWYGSIKVGGQCVTDGQFANLAINYGPGTGNTPHCLARNNDDSQTANTGNAIVDACNSRSTYADMASCAEGGAHAWGHNGIGAVMKDVYASPADPVFFLHHGFIDRNFRIWQNNGGNQRMTTVGGTDAAGRALTLDTKINVYDFRPDVRIGDILDTTGPALCYKYNY
KZM27283.1	>ST47_g1567	MKATTTVFGLALALSGSAQADMVMSGCAIQHKAGNGGNAFTIFWSGVPAASTSTICGHFDEDLTGITTSQKIQKLGDKCSTDNAGGMSTVVTLNKQSCLTQANAIIEAARKALGTGGTFDDTNTCNFAVSNC
KZM27290.1	>ST47_g1574	MKLTTLVSVALLALSVAAQNSGPNGKRTCIGGAHLLRVPEGSLRQLLQRLPGGRPQRYPQLYRPFLLMSRGPG
KZM27291.1	>ST47_g1576	MQISLLSLWSCLLSIVSSQSTFTPARPPSLPLAVKSPYLSAWVPAGSSGGNGGYLPGQWPQFYTGQILGWTGLIRVDNETSTWMGAPKNIPAANQTSYEYTSTKSIFTIEANQKVSLKVTFLSPLFPKDLKRQSLIFSYMNIEVLSLDGSEHDVQIYTDISAEWVSGDVAVTAQWDFGLTDDVVYHRLSRQDPQVLSEINDRAEWGSFYYVTDAKNGVSYQSGADGNVRGAFVTGGKLANLNDTNFRAINSTWPVFGYGVDLGSIGASPVSTLFPLGLCQDESIQFLGAEGVTVLPSLWKSYFADDLAALSFFHNDYTESSELSSELDDQISEDSIAAAGQDYATLTTLAARQAFAATQLVGTEDRPYLFLKEISSNGNTQTIDVIYPASPIFLYANPD…
KZM27292.1	>ST47_g1571	MVARSTLSAFLLGLVSTVLATPITTQKGDYVNWRKFHANGVNLGGWLAQEASIDPYWWDQHCRGTVDEWNCCIKLGDQCHSVFEKRYATYITAKDIDKLASGGVNLIRIPTTYAAWVKIPGAGYHSGNQRKYFKRVADYAIKKYGMHVVVDLHSLPGGVNGLDIGERVGKWDWFNNQTNFDLSLKAVDAALHFIQSSGSPRSYSLAPINEPADEPDFSKFGTPAALTDTGADWVLKYFKAVIARAEAVNCKIPIMLQGSFRGEPSWSGHFSYNTNIVFDVHNYYFALPIDSGNITSRLCADAKTLAGDGKFPVFVGEWAIETGANNKFANRAKNLNTGLYAYNKYTQGNAYWTGKYLGNVSVAGEGTKRDYWNYASFIDTGIINEKQGKFYCH
KZM27333.1	>ST47_g1534	MRSVVALSVAALVGSALAHPSYGQYQHKEVKNVHVLVETAVHTVYEPVKPTSTSIYVAPPAPTSEAPTATAAAPSASVPPPSGGDTYIGIISKWRAKLGLKELASSAELEINALNCVTTSAGVMTHKLNPGTYGQVLAPGKHTMESFLSIFVGGWLCEIPTLPGLDGVCSTMSEGWAYEGQTGHAEILTSDKYSKIGCC
KZM27342.1	>ST47_g1516	MRRTMLSRYVLYMLCGVSGALSRAVPDAGQVPLLKDSQQHDPKPQGLEVMVAFKRSGDDHEAMWHLPLRQPQRGSLLQGDSWRNARKEVNAIGIVAVVDVQTGTSAGLEELAQVRCTVEPVFSEEEVRAAAVSGAELGVWPHFGVEDGMVRFDRSESRWFLAGRSIETVECW
KZM27376.1	>ST47_g1490	MRLSLSKSLLALAATALPLVAADDERRIESRSLNPCMSNSSFSATLFQVTFTPANRSLAFNIEGISNIAGKVEADLQLLVYGYVALDEVLDPCGNDDLSGMCPMNSGPLTIKSNLDISQDIMGSIPGIAYTVPDLDAVVRIKIRDLDTKVQLACVEAELSNGHSVEQKAVAWTTAVIAGLGLVASAVTSGLGHSNTAAHVAANAMSLFGYMQAQAFIGMTAVPLPPIVAAWTQNFQWSMGIIRVDFLQKMATWYQRATGGTPTTYLSQLAYISVEVQKHKKAKRAMEGIKFATRAVQRLMNRSNSAATEAQAGGQRLVLHGIERVGFKARIETTNIFFTGYTFFMIFVLFTIIGVVAFKFICEGLTKAGRMKGDKFIDFRNGWRTVLKGILFRVVLIGF…
KZM27378.1	>ST47_g1468	MIARSLALAGLYVSTALAVCTKLEDCPQYETLKTADCQPYHHFLLRGSTSPYPGHVIETVAKVCDRLNTESTPKACGYEDIHYAAMNGGERWCKSAHEGAINGAAQMRNYTQRCPDSHLIVMGFSQGGSVGLDILGGGGGELWGCMQESNPAMDRSTAPGSKVAAALMYGPTRRSANQTWTVGGGEVSDGGAPRTAEQNAGLKPYADAGILREYCQPRDPICAPHTKDTDMSFHLSYFDKYSDEASAWVVDLAKKAANNNTSNDENQSDGDHTSGAGGMLKAGIKHPVANFRPPWTLHLHFQHARTKGKSRFSAQDFDQTQSQLIRSPHPQVNFDPQHQQYNVKLRPLPTKGEVFSFLNLPAELRNTIYELICNGTQEFLPVYHHSIAPRFNFDDAVEF…
KZM27395.1	>ST47_g1467	MSVIGGPQVKTRFFQIASVAVFLLSASAQNSTTPPANASMSMIPTNGAELVPSGQNYSGNIEPIPWSTRPEVYDHTGNAVRHGRARLNMIRVHYYTAGSGPPLLLVHGTPKTNYYWYKLVPLLSQHYTIVAPDLRGFGYTDKPGAEMGYDSRTNAKDLADLMTMLGHSTFYVHGEDRGAEFAYVLAAEYRDRVLALSFGEMLLSGYGLDNASQFTESNVMLQYEQRGVWTWHIPFFYMIDVATMLITGHEEEFWTYFMEAECYNPISLSRQAIAEWTGLAKGPGGLRGILETYRAGLVNGQINHELVPNKLAMPVMTIGSPEFFGSLVKPEMEMAANNVTQSYIFEECGHSLALEAESQKLQLKLDETSDICKEPFGLKGSKDHPLGIYRTHDETLPSS…
KZM27418.1	>ST47_g1404	MLYSTALVLSTLAVGQAAAAHHHNRHASFHARRQADAKRSPGNDINWKAVAYDLNDVDWDKVNWSSVFTSPTPTPTAQQAQPTSTVAASSVVEQTTSAQAAPTSSAAVVEVQEAKTSAAPSSTVVTSSAAAASSSAPAATSSSSSDLGDLIGDVVSDLLEGVEDLCKTLGIVSTGKNDKSNNGAIWVGDDGDWKAEFTNDADEDAVIFCWKADGFSGMSLNVNQPEVSVGLKAGQKTVVSFAADVPSACAPAFKDTKLANFGGLDQTWWEVTFGQYGAFDVSRNVNMKGRTINSKGSKCESTMSKCVFKCKDDSVSSCEKGSDYDLFNCDSSSGGGGGYDPIMAGTGGGCSMASSGETIQVSFS
KZM27423.1	>ST47_g1403	MARSSRSASKRSTWSIAFYLLMVLVAGLMLAKTARAEDQEPLAEDSNAISGPVIGIDLGTTYSCVGIMKNGKVEIMVNDQGNRITPSWVAFTDDERLVGDAAKNQFASNPHRTVFDVKRLIGQKFSDKSVQNDIKHFPFKVVNKGGQPRVSVEVHKEETTFTPEEISAMVLGKMKEVAESYLGEPVKNAVVTVPAYFNDAQRAATKDAGTIAGLNVLRVVNEPTAAALAYGLDKTDQPERQVLVYDLGGGTFDVSILTIEDGVFEVQSTAGDTHLGGEDFDNRIISYFTKKYNKENDVDITKDAKTMGKLKREVEKAKRTLSSQKTTKIEIESFYKGNDFSETLTRAKFEELNNDLFKKTLKPVEQVLKDAKLKKSDIDDIVLVGGSTRIPKVQQMLEE…
KZM27425.1	>ST47_g1427	MKYALPLTLAGALLAQGCSALWLLPTARNFIYIVPDGYGPASQTMARDYVSLLQNGENPKAPVSIQLPADQMVIGSVRTQASNNLITDSAASATAFGCGVKTYNNAIAVDDDGQPVGSILEAAKMEGFKTGLVVTSTINHATPACYAAHVADRNSYEKIAEHEIGYSHPLGPQVDILMGGGRCYFKPKSDPTSCREDDIDLFGYAKGKGYRVMQDRKAFDELKKGTAKAADLPYIGLFNDGETFSSTNRCEADGNPDQMMYEIDRQQNPQQEPSLLEMVETALTSLDRATKWNVKGYFLMIEASRIDHAGHANDAVGHLHDTIMYNNVMKYVREWIDKHPDTMMLSAADHECGGLTLNGFNPLPLQGASMSTEHAETLWKNYNGTDRRAYLRSTILPGY…
KZM27428.1	>ST47_g1424	MKFTIIAAIAAFAAPIAAGPAASAPADAFAMSKRATISIPASKGSVTYKAAKKISGTFDGGLKTYGRGVSCTGQAEGGDADAVFIIENGGTLKNAIIGKDQIEGVHCKGACTIQNVWWVDVCEDALTLKGDGNALVSGGGAQSAADKVVQHNGKGTVTIDGFQVSDFGKLYRACGNCKNSVSRSVVIKNVKSYSGKLLAGINPNFGGTASITGTCATSVKAICEEFKGTTPGNEPKSVSKGPSNNCKYTASAIKAC
KZM27431.1	>ST47_g1421	MHLLSVVALTASLAAPALAAPAPAITPAPEAAVVKRATSCTFSGSAGAASASQSQAACATIVLNNVAVPSGTTLDLSKLADDTTVIFEGTTTWGYKEWAGPLLSIAGNKITVKGATGAVLDADGARWWDGKGGNGGKTKPKFFAAHNLKTSSITNLSIKNTPVQAVSIAGCDGLTITDMTIDDSAGDTGSLGHNTDGFDIGTSSNVTVNNAKVYNQDDCVAVNSGTDITFQNGLCSGGHGLSIGSVGGRSNNVVDTVTFYNNVIQNSVNGLRVKASVGDTGTINKVTYNKITLKNISKYGALIEQNYDGGDLKGTAGTGIPITNLVVENITGTGAVSSSGYDVVVTCGSSTSCTGWTWSNVAITGGKTYGSCTNVPSVTKCSALTIERARRSRVHALQQ…
KZM27438.1	>ST47_g1398	MHPASSLLALLTVAAQYASALDRRLPAGVALSDNVLNLEVGESFMGAMPPSSEYLASLRRNAIKKKMKRQSDKLANVTENLLTLGGRVYMANITLGNRVYSLVLDTGSSDTWVAQTGFACRNGAGISLLTSTCGFGPLYNTTASRSYKPYSPTQGFSVNYTSGEYLKGILATEFFGIGDVGAGYAPRQIVNQTIGVVQQGFWDGDGTSSGLMGLAYSRLASGSSVIGYESVIFTLFDQKYYPSVFSLALNRTAVGGSARASGGLLAIGGIPRVNYDATSWSETAIVPVSAGVYTYYSIAITGYSITAPTGSLVTPQNFTASRQSIIVDSGTTLIYLPDRITDYIASLFSPPAVFNAASQLYFVTCSATAPRVGVTIAGKTYFINTDDLMNRGAGAVGGA…
KZM27444.1	>ST47_g1396	MLSLHTLILSVISFLVLVAAIVYHSSNAQMFSTILDDDMSSKCAIVVGSGLAGLSAASQLVKQNVTVRVLERATKPGGNSIKASSGINGAPTKYQPVQEPENAFYSDTVVSAGKRMSNFTAERERLVRTLTEGSAGAVQWLEEKGVDLSKVAQLGGHSYARTHRGTGPPPGFAIISALLKGLQESPLFHLQTSCTVTKVLQERKRVTGVEYMDANGNYEELHGPVIFASGGFGGDAKGLLARYRPDLAGYSSTNDPRPGTQPLLTAAGARLIDMDSVQVHPTGFVDPADPAAPLKFLAGEVLRGEGGVLLLNGKRFVNELDTRENVANAITSTPSTSESPRQWEVQLVLDEASYNAAKSHVDFYVFKGLMRKTTLSELGSEALETIRQYAETVSSGAED…
KZM27447.1	>ST47_g1416	MVAITSLLTTLFMVAGIASAKPVPKTAEQPVVTYLGTQGPILSSGAWTSKGIVYTSGTVPSFNGSIVAGGIEAQTAQVIKNIGAVLEEAGTSWDYVMKTTVFLANMSDYTAMNEVYGSMLPSPKPARTAVEVGKLPGNFLIEIEAIAAIPDSLTLAILVQTTKKAIQYDQSCLRLWMYSTPVFGVSSSHAALTDASKAVTSQMYAPFTTTRQQRQAHETDSPRRFDAIPSKRRRPRKEAGRPALKMRRTQTRGIAAEAPSTVGHDLQHGLQLGIPAVVAHGSLKERKLDDYSSDEVPGRRRTFVRSYAKWQRDTQADEEERTMNETTRVVTRYSKPQNLPSVLKSRRRDNTPYQQSRFDLQRRRKPVYYRTISIPPTEPKLATVSSDLQSQKFALHLLC…
KZM27448.1	>ST47_g1417	MKGLFTASAALTLASGTLAGPVAPRSSLFFKPLAVTPDSVHNVHIGYGDDAFEGEVRVVYGGCDMARLDDRHQELGTARITRSSRPERFVWIVPDNAVHGGCLHAYSGSALVGRSAPVTVKQPTRKREEISDVADVTGPWFDGVAYMQAKQNKASFVAVAKSKKIAILGGGMAGLMTSLLLDSVGIHDWHITESSQRIGGRIRTKYLAGSTPEQYQYQEMGPMRFPVSTRYADTNETVDIEDHKMVFQLADVLNQMNGNDSALAVNFIPWIQSSPNVPANSNGYRLPNGRIPSAAQLRANSSLALPAAVGPDPAAEEHAEEALDEFKGITPEVLRNISTNIYRAHKAAVEKGLFHWSESAYLRYALNMSANEVDLLAGTDNSPMWEYDTAYFGATTWRT…
KZM27453.1	>ST47_g1410	MAIPKRLVLLLTATFLLLLVAMLLATAIEIRAPPPKIAAVTLAQAAKYGESERKALNGTTPAMPQTDEGMIGDQETPAPSPPPPPPALQILALSYSGSGGPKHCRGSLLQKTAFERPAAQWKDGSCINLPGDARCGVFYAEKGDNCEAQLFNEADCSNTSMSYVNTVVFMPEERPVGALWRSMWVKCGVDVPEAVMLDPAILGGALGKKPG
KZM27456.1	>ST47_g1431	MVSAWFVARVSVAFAPLASVVAQYATPPVLPELLDATGDELVSGLEAGDFTSLDLVQAYVGRILEVNSTLHMVTEINPDAWKIAKELDEERACGKIRGPLHGLPILIKNNIATADEMNNTAGSFSLLGAKAPRDATVAAKLRAAGAILLGKTNLSQWANYRSANSSNGWSAYGGQTYGAYYPGQDPSGSSSGSGVSASLGLAFGTLGTETDGSIVSPSELNNVVGIKPTVGLTSRALVIPISEHQDTVGPIARTVKDAAYILQAIAGPDQYDNYTSAIPWASHSTNATVPNYVAACKLDALAGKRIGIPRNALGSRNVISAPIFDAFDAAIAVLREAGAIVVDNTNYTAYAAYLNSTAENIVLAGDFGPNLAAYLAQLTYNPTDVNDLEEVRNFTQTFP…
KZM27457.1	>ST47_g1432	MKATLAAVALFLGTALAAPTATAFPTPASSTGLPAAKLIPAGTVFDGKMVRYSRSPDTCQDQTETDEAAAMFIAEDGATIKNVILSKAQAEGIHCRGACTLENVWWEDVCEDAATFKQPAGKTSRVIGGGAKGAADKIFQFNGRGTVSIKDFYAEDYGKLIRSCGDCTANGGPRNIILEGVTARDGGVLCGINTNFGDTCKIIDSCQSNNKSCDRYKGVVKGSGSSTKLGSGPDGTLCTTSGFTKSC
KZM27465.1	>ST47_g1388	MASRKCTIVALLVSTSSANIISQFSGPGRITGTNFGIPGRNATYDYVIVGGGLAGSVVASRLTEHTNASVALIEAGSFYELSNGNWSQIPYWSEQWVGAEPDDWQPLIDWGLFTEPQINGERIHYAQGKNFGGSSGRNQMIYHRPSVGSLKAWADHVGDQSWTWENMTKYYERSMQLTTNFANRTANNGSLVYDASAFGPSGSNTQPLHVSFPNYINPLSDYAAAAFSAIGLKQIPGFASGILDGFGWFQFTINAQTGLRSSAESSFLAEAFGRPGLTAFINAQVRNIIFENDTATAVNVTTYGMRPFTISARKEVIVSAGVWHSPQLLMVSGIGPKATLDKFGIEIVKDLPGVGQNVWDSTNIGGPIHEISVPGFTYWQQPGPMASAQAQLLSNGSGP…
KZM27470.1	>ST47_g1386	MLSGTRIIVILTLTLAAAAHSQHHLSPREVAENHHISKRCASAAGSFVQERKKRSIAKRNVLMPRNSNVTIHTEGPHFSAIQNNTCIMNPNITPGPYYWPRSETLRQDMREDQAGIPLYLDIGVLDTNTCEPAPDVLLDLWHCNATGSYSSFESLSPNIPFLELLKDRNITNITDLDLHTDDSTWLRGMWPTDANGVSELVTNYPGFYVGRAIHIHVQAHTDWVVRNNGTIVASNLASTGQIYFDEEITEKIMAMAPYNQHTEINRTTNSVDLLYPEATKVGWNPNIQIEPLDGVDVANGMIGYITFGVNVTATSPQVPFLNSTQLSYLLSLESPTPAP
KZM27473.1	>ST47_g1383	MFSAALLLGAVATLLDTVSAHGFINSVSTNGASTKGSDPSWYYSPANSRPQTAGWDSLNQDNGFVEPAALGTDDISCHKSATAGRLYANVAAGSVLTLYWNTWPESHKGPVINYIAPCNGDCTTLTPGSLRWSKISQAGLITPGGTGTWATDNLIKTNFTSTTTIPKNLKAGNYVIRHEIIALHSASSDNGAQFYPQCLNLKVTGSGSVAPSGGVAGTSLYKRTDAGILFNLYNNPTSYPFPGPALWTAAN
KZM27475.1	>ST47_g1381	MYIIQTTTAVLIAFLALLAWDEVRNRLSKGRTRNKDPEAPDSPRRLSFRGWRFKVVEKSPEVVVTKGKPLVPKPTVEIPSVADVNELWTYKRLYHKLHNLEHHFEILPECRELLLSFLSSTLDDALRDPDSGILSVKEFSREELHQFLKEKDFGVTNRWEEYLARRRAGGSREVFGDMEEAKWWLKQAAPVKYVDGAWLGHINKITTPFKYRNITKNAWQVMSEELGDGDLAKNHVYVYRQLMDDIDAGLPAADSEDFIDSCHNLDQTRCWKAAVAQLLISLFPHDFLPESLGFNMAYESLPLHLLKTVKELREVRLNPYYFELHISIDNADSGHAAMAMAAVADYIDRIEQDEGAAAAKVAWKRVQAGYVLAEGLPTTPESPSLKVEAEETFPRTETE…
KZM27505.1	>ST47_g1372	MTLGVTTHAIFFSLVALFMTSGSFAAKYLHHPDQRVRVNTAVYTGKSSATNISTLSKRWDGSPAMGRELHDANGKACALWPMMHLDDAKAGQMFTPPRALAHSDFLQLDDLTRWGYVPKLPMRHPKCDMDNGKDMYGLQAFLEAKGMSAEKKDWKCVRITHGDPEHKTTNIDDQTYANPRTGHTVRVTGALYQFAINAKDGVIVIAKQYSAAHQSQYRRPPVQAPALPDLRSSSDITWLAWKPYHDKGVKLHHIITWSVTNGATQRLVAAAIEAASDESLRDADKALRPYPWVGWTADQTPGSLILGSPNGVGIGYLLVQHKPELGNRRVRNIEVFLADTGASNLHEPSIAWEVEDAPAM
KZM27508.1	>ST47_g1379	MVSISNVTHSLFTLLSLASFASAELICGTLGYHNETNLSFFMGNFFYNGLTSFTMCAAYCQQDEQCEAFRHSYWDDADAQYCEFFDTSLKKLDKDKPQHTSSPRDLLAMREGDPNERIDVPFVHSHDHKSALDYLRFRNVGKVTRRVIARPMTRRLYNERYAHDQNGNFIGTGVKAPDAGLVFIPGKGTEQDLLDQVSKFAHAKQHDPRDFADGYGTTLIDGGHVGS
KZM27542.1	>ST47_g1257	MRRKAPISAAVAAAALVTATALTVAGCGSTEGTPEAAASSTAASSTASATSTANETETTVASSPPPQSNTRTNVSTTATTTAIPASGPCLDVGSSLVTDAIGTLGTDINGGNWIPRSASEEQIGNCPDLLWVSVDGDGVGDATYQSHVLFFHDGTYLGTATSEPYSYTHVIDSNKDSVSVQYRWLLDDDAFCCPQGGPNIVNFTWNGSAVVADGQFPPS
KZM27569.1	>ST47_g1152	MRAILVAGMSAFVAVVSAPSAGAETTTNQVRSFSETTSVGVHNSYEKATFPYFADALDSGASLLELDLWTNGGGPDWRVSHMNPVVSDSNCVGAQDASGLRSGLRDQGFRGCLADMRAWHEANPEHPPVMIKLEIKDGFTAGYGRGPADLDALILGTLGDAVFTPADLMGESYSTPDAAVTERGWPSTSEMTGKFLFELIPGTIEEGNPLDTEWTDRQYATHLRDLSSAGLVELGAAFPAVHRASPGDPRLDRYTDPGIRPWFVIFDGDALDYTAGVVDPSWYHDRGYLLVMTDAHKVAPQIDGTHATETEASERLDLLAGQHASYITADWSRLPNDGFMRTVTWNPEVYGRYSGERSRPFVDLVSRVATEDPTRVADLGCGSGTLTAMLGERWPDASV…
KZM27595.1	>ST47_g1119	MKQRSYALLAAATGTVLALTACSTGGSSGSGGGEPVTDGTFKLALVADPGALNPLMTAASPAHQLARLSYDYLLHPDPDTGVTKPWLAEKWEETTTSASFTIRDGVTCNDGSALTAQTVADNVNFITNAANKSALRGVYAPATATATADPATRTVTVTTPEPSPFLLLNLARIPIMCEAGLKDPTAANKTTFGSGMFQMTEAVANDHYSYVRRDGYNWGPDGTTSDTAGVPKNVVASIITNNSTAANQVLSGDLNAAAISGPDQDRMNAANLDTVKQPAPAGEMFFNHSPGNPTSDPAVRKALVQALNLDDLAEIFTAGRGTRSTTMVSIEPRACIYDSVAGNLPDFDTSAAAATLESAGWKVGADGKRSKDGTPLRIRMVYETFGDATDAAADVAVNA…
KZM27596.1	>ST47_g1118	MKHRFYPTLAAAAGLTLVLSACGSGGTSSGASGGEPATDGTFRFALQADPGALNPIMSAASATAELSRLAYDYLIYQDPDTSEVGPWLAEKWEETPTSASFTIRDGVTCTDGSTLTPQTVADNINFVANPDNGSQLRGSSVPTGATATADPATRTVTVTTPAPSPFLLLNVGRLPILCEAGLKDPTASNKKSLGTGMFEVTEVAANDHYTFQRREGYNWGPDGTTSDTPGVPKTVVAAMSPNVSTAANQLLSGELNAAPIAGPDKDRVAAANLDSVGRPLPAGQMYFNQIASNPTSDPAVRKALIQAVDLDDLTQVITAGHGVRATSLVAVEPRACVYDSVAGNIPDFDLTAAKATLDGAGWTAGADGKRSKDGKPLNLRLVYDGTDDPRNAAAELAQS…
KZM27600.1	>ST47_g1301	MRSVPRLRGRLAGTISLLTAAVVVAATGVSAAAPSPAPTAQNSVYALANGCFALRTESGDFVRRDGSAYLTDVTKAADAEPFRLHAAQLGRFMLYGPDGSMLSHDGADSVLATSEATPSTDWTLMSTGESFVLTATSNGRQLISRDLMLTMSDPGDVPESAFTLIPRDGCADFPEAEVGANGVPGEIGPNGEVTGFIDTHVHMNASEFMGGNLHCGRPFDPQGVTAALVDCPDHQPDGIPALLENVLSYGNPFETHDTTGWPSFTDWPAHDSLTHEQTYYKWVERAWRGGLRIFTNLFVANRVLCELYPSKRNPCDEMETVRIQAQQTRELQDYIDAQYGGPGRGWFRIVSSPEQARQVAADGKLAVTLGVEVSEPFGCSVRNGIPQCTEDDIDRGLDE…
KZM27601.1	>ST47_g1306	MKLQYRRRAVTASLAVAAAAVGLAVTAPAAHASPEDPTHGVVGSYSATQPGDIVVDSATHRGYITQYGGPTSSLSVVDTNTGKSVGTIDGVVGYPSALAVDSGLGRAYVSSSYGGAISIVDTKTGKVEKTVTLSEKNPDGSRPQINDVVVDPTTHRAYFSDYKSGNIRVVDPNAADAVSSILVHKSATPTKLAFDSVRGFLYIADTNFFDENYGRTLWQADVRKGGALKSIVRADNLYPVDVDVDTNTGNIYMTDTRATNLWAITPAGAVLSKTTLSPTAIPNGVVVDAAAGIAYVADVINGHLWSVDLTTRATTALTDTKVPALEKVKNLALDTSTGAIASTTNGGKVTVVAAYPLPATVELPAAQVGKAYSQKLTAADARATFALTSGTLPGGLSLA…
KZM27602.1	>ST47_g1307	MSRSHANSVRTFAVVAVIASALAGCSDSPGAPDNLTSETGSVEIVRVSAHDPDAFTQGLEIDGNRLYESTGRVGQSWVRSSEISDEQSPASGPEVARADLDPPLFGEGITVAGDTLWQLTWKDGVAIARDKDTLTERERFPLDTEGWGICSLGDRIVSSDGSATLTFRDPETFAPISTVDVTRSSESVGKLNELECAEDGSVYANVWTTDTVVRIDPSDGSVTNVYDASPLREELVADGSTSTVDVLNGIAQIPGTDRFLLTGKYWPQMFEVHPGYDNYPPAARPDNYPPSARPAARRTPLPPLHPIPESRGDSESAAGSKTPGADAPKAPPMPRKLTVTRVAAMRSRELTNKGIATFQRAAKADGADKSGLTALTYAVMTNNATDAAISVALANTLFF…
KZM27604.1	>ST47_g1305	MSGRHRKPTTTGRTVAKVAVTGAIMGVAGIAATGTANAAPDSDWDRLAQCEAGGNWAINTGNGYQGGLQFSPSTWNAHGGGQYAATANQATREQQIVVAERVLANQGWGAWPSCSSSLGLSSGATERSAPATTAPQAAPAPAQQVAQTVAHPVADAIDQAIAFAEANGIPVDPQILAVADTAKSFLK
KZM27635.1	>ST47_g1229	MRRASPWLLILCLVLLVLVLIPGIGSEQMGARSWFVIAGISFQPSELAKLALAIWSAATVASFMKARMDVNRALPVIGGTTLLVLVLVVLEKDLGTTITIGIIFMSVLWFGLFRMKTFISLTLGSAVAFLVLGLTAGYRSDRIKAFLNPDLDPQGLNFQSTQAKYALANGGIFGRGLGQSDAKWSYLPQAHNDFIFAVIGEELGLVGALIVVALFAAVLIVGLRIAKRSTDPFLKVMTATATTLIVVQAFINIAYVVGLIPVTGLQLPLISAGGTSMITTLLMFGLIAHAAFREPEAVASAESSGRGWIPLVFGKPRFGIAKKPQTDRRRPPARRAQPAPTGQRRPERRAPQPDRRRAPAPGRRAPSRDWSEDPRRRGRSDRPRRAS
KZM27652.1	>ST47_g1246	MQQRSTGTVTRSLLLLLLPFIALLAVPPLGSSGSAAVLGTAIAVFVVAALATSSKYELLQLCAVSATGPSDDERCLRGAFRRQSSPDAPGRPQPRAPGIGL
KZM27653.1	>ST47_g1245	MSHHRFTDPRTRKHALGRALVVGVLSLTTLAVSIDTANAQAPVLRDWNIAAVSVDTNPAKVSAFASSDTGRVLAAAESKIGAPYVWGATGPDSFDCCGLVQWAYAQAGVSIPRTSYDQAVGGTPVSRDDLQPGDVVLYYGGEHVGIYTGGGEIVHAPTSGESVERAPVDSMPYYLARRY
KZM27659.1	>ST47_g1265	MKRSYRVRARIWMVVLASATLVVTGCAGSSQGTTTDASDVTVGVVGDQNNGGEPRSGGTVSFATYNGISSLDPADRQDGGATGGSEMAAIYDLLMRFDTSAGEYVPHLAQSLSANGDNTVWTLKLRDGVTFSDGTPMDSAAVLWSIDHYLQKKGTHALVWKTAVRETNSPDPSTVVFTLAQPWDEFPIMFTTGPGMIVAPSSMATGTFTPIGAGPFTVEKFASQDELVLAARPTYWDGAPYLEKLRFPAIVNEKSKLEGLHTDGIQVAYLKSPDFIHEAFEAGDPGFVYSASMAGVLAINQRDDRAAKDERVRKAIVAAVDPNTFNERVQGGFGEPGTDMFASWSQWHGSVAGNGFDPEAAKKYLAEAKADGYDGKLTYVGMNDPATQRSALTFQSLLQ…
KZM27661.1	>ST47_g1267	MIFTLVMPVVFFLVFGLGQGDDDHGIGHGNVAAYIMISMALYGAMLATTSGGAMVSIERASGWSRQLRLTPLTPVAYIAVKLIMAMLLGLVSILVVYVVGAFTSAQMDGSLWFTTALIAWLGSSIFAAFGLFMGYLLPSENVMQLLGPGLALLAFGGGLFVPLTDGSVWATIAQFTPMFGINALAHAPLTGNSIHWTWIVNILLSQTTDREDSVALPRRNRFGVLFAAVWMVFLGGPLIEGWNLRDELRGWTGILATIAFSALYLYTFATTQQRRRMTMTRPTIREAALTLAALTALAAVMIVSVGPTGLAAAPYLAVTAVTLLPTVAGGILALVFAASVEIVSLSSGWGNYSGLSLGVCAAAFATWGIMSLISRNFAILHEREEQEQRAIMEERTRMA…
KZM27690.1	>ST47_g1142	MNKATKGAVAAGAAALLLAGGAGTMAAWNANAPMTGGTINSGHLTLTASGTPTWSVNGTALAPGAIDTYKVVPGDKVVYSGKVTIGAVGNNLSATLKADLSSIGGTSTLPTEMAPVVTASVGAATLPTNGTGVAITSANNGDLVDVNVSFDFTKAAATNVLRKHYRWWATAAALVIGLIFVSVQQTSARWTAAETLSGGTIQSGILDLTVGSAGSGQSSYDFTALGATGMFPNAYAQAPLTVHNSGSVPLNYRIQNVTQSSADVPLALVVTPVATEAGCPAQGAAAGTAIYDGPMVGAQVPTASGWRTVAAGSTEILCLRGTVGPDVASVKGSDQRTGAWWWIRNIVSWALLLGVLAILLSTVVVPRLTGSTPFTVLTGSMQPTYPPGTLIVVKPQDAA…
KZM27691.1	>ST47_g1143	MIGTSLVMLGGAAFLTGCADTGSLGSSGGGKPTTTTSVPATTTPVVTTPVESGSLALKTVTAPTWTDQNGPIDLSTMVVVPGDVLTYHASFALEIKGTGMKAKLSTSDLGVSGGAALVAQLKPVTEVKLDGVPVPVGADGTVVSTAKDGKIVDVAIRFTFDKDSATALSMDQSLNLARFDVNLVQIPA
KZM27694.1	>ST47_g1128	MGSKQGRRTSRVAVAIVGAVAAGLALAGPSAAVPLFPGGPDIPLPVIPGVPYLDPAIPVPGIPGTPIQAPIGAPNFSAPSLNPSAGETVGIAQPIIIRFNEAVGDRATAERAIRVTTDPPVEGSFYWINDSQVRWKPTQFWPANISVTVDAGDSHSTFNIGDALVTVADDNTKQVTVTRNGEVVRTMPTSFGKPGHETPNGTYIVGEQLRDMYMDSSTYGVPIDSPEGYRTYVEYATRISYSGIFVHAAPWSVAQQGFTNVSHGCLNVSTEDAKWFFENAGKGDPVIVQNTADIDEEGPAREVFAQGLFRVAFSSSVLYVHHSFVAGGQTASVRSSPERTLPTSGKPGLWGRPWRDYALFALLVGPNLALLILFTYRPLVDNIRLSFFDWNIADPKATF…
KZM27696.1	>ST47_g1126	MRAASLAAGGVILAAFGLSLGSGTASAATLDCSARGQDQTIVDGSSACRAVADPSSYAISHVEGDGVGVADSRDGGRSAGLGLFGGVAAAESRGGLLAAVAYGPGSLALGRTDSSPFAVVLSGPGGRAAVGDADVGAICSGGPTLVFNIATGQGCFSDGTSTWVTPARRGSLARVEVPSRTELYVDRRFLPLADRFFAMYRQPQQGGGALVVYLGGEKVLDIWAGNADRDRRWDHDTVSLSFSTGKGVASTVVHRLAERGLIDYDAPVARYWPEFAAAGKDKITVRELMSHRAGLHRVRGLMPHPLDLMDYDAVVAALAAEKPDPRRLRGPGYHAVTYGWLVAELVARVSGQPFIDVVQAEIAKPLGVDEFWYRVPETERPRIAKLFPHINPAGLNWAF…
KZM27698.1	>ST47_g1124	MSGIVRRLCTAVIATSAIAAFTVGCGSDIEPKAIAESSSSVADSTTTSAAPTTSKITGQEGSDDGGDVDIDVSIGDCVKLGGTTTAAEIDNADCGSKDSNYKVVAKVPTSDLCASDVDSYYYETLAGDEQGAVCLDVDWVVGGCMDLGSGMDEPARIECSDTSGTNVVEVVEILQNSTSIDECGSGADSGFEHPERKFTVCVATL
KZM27722.1	>ST47_g1331	MRVAIAAVLLGGVIAGSLITRSQWDALETSVSNIVGVLSPSLSDTVYLLYGIAILALPFAILIGLIVGRRWKLLAGYAAAGLCAGVALSFTGTGLAAPKWHLDVPDRLDATFLSQFLDDPRWIAMLAAVLTVSGPWLPKKWRRAWWTLLLLFAPIHLIVSSIVPARSMLGLAVGYLIGAVIVLAVGTPALEVPLDSAVRVLARRGYRVTAFRVVSPSGIGPLVMSAAIDQAPDDEPFDELVVELYGQNQRSSGAIRQTFRWISFRNRETPPPYGSLRRAVEHRALMGIAFADIGLASSKAVAISVLDRGWEMYARPSPRGIPLAVAVENQAGEEESTKLIDALWQTLHTAHVHQMAHGDLRASEIRVEGGTILFGGYAYSEFGATEVQMQSDNAQLLFA…
KZM27731.1	>ST47_g1299	MIRPRFARSVAAVVALVTLSSFAVACSGSSDEVVKTADGKTVLRYEGSTGQVIYPELAADLGYFNDVELNWIGDTTSGPQSIQNAATGQTEFGGAFNGAVVKLASAGSPITSVIGYYGSDKESFNGYYVLDDSPIKSAKDLIGKKVGMNTLGAHHEFVVREWLAREGLTPDEIKQVELIVVPPVNTEQALRQGQIDVATLGSVFRDSALERGGLRELFTDESLFGSFTYGTLVFRDDYIAQNKEAVADFVQGTARAIRWTQTHPREEVVAKLTSIINSRGRNEDTKLISYWKSPGVAGPGGTITDTEISTWIDWLTRNGELEEGKLKPSDIYTNEFNPKMSTEPKLRLEHVTKQFDIRGTDEVFTAVEDINIDVAPGEFLVLVGPSGCGKSTLLDLLGG…
KZM27771.1	>ST47_g1086	MRFTISLTTTFTLAAAAAVSTQFPLYKSPSSSVHIAQECLLPGVVCLQKHAAKLPYPFFREPVNGTFFNTFGDTEVPEDDSWDLVAKADFVLFDEERGRQVLGEYPSIDFMFEVSPYLHESPVFVPGLNKIFFSELSPTIDQFVIDLNSTYPTLSTFVADPPIYVPNGAFYHEGKVYYSVAGSNATVAGGPEQRPGIVLMDPWTYKTTTVLDNYFGFAFTDCDDVIVDPITGFVWFTVPYYSWWLEVADIAPQLKSATYRFDPASGSTVVVNDEMRSPNGIALSPDRRHLYISDTAAAGLSAPISLDVPSPGIPGILFNNTGKRTIYKFDLVDEGRTIINKRPIHYDVIGTVPDGLKVARNGYVVTASGNGLSVMDQFGDMILRVQTNFTANNFIWTDA…
KZM27774.1	>ST47_g1078	MRFTSLATALTTLSAASARIIGIEAPSTLAPNSTFNLTLLTESYIQSVADISVAWGYALAPGYPATLGAFIQSSYLGPNKSNTAENITIQATVPAGLASDSYNGSLVLTAGVYSLYGASSAPVVTGFNVTVEVGEETSEELVISNGTAWNVNSLSQS
KZM27776.1	>ST47_g1071	MCRKMSLRRLCTVALLSLSVFTITTIAAQTKDRPVSDTRTQVYETSNHNIPQTHLRSSDVANKAAAPNAPSYLPFTANILQGLHNALETMQSSYFSIWLGKYTTAIDWTAAVMSTHVSATLASLSRSLAYTMPGTFDMSKNLDVEAQMVENEINKYFGQIATYYFGEDHFAIRMQAYDDILWVVLGWLESTQFIEGHSAGHYGSDSQGETTIPQWHARQFIPGFAHRARVFYELAEKGWDWRLCGGGMTWNPRLLPYKNAITNQLFISASIGMYLHFPGDANCSPFLSQYDKVQDSNDKKPNDELLHAQEHGDQCEENTSGDSSYDPVYLANAIHGYDWLKNSGMTNRQGLYVDGFHIAGYRTNHSKTECNERNEMVYTYNQGVVLSGLRGLWEATGKQ…
KZM27782.1	>ST47_g1077	MRFSTVIAGLLFGLEATAIRVGPVKAAQKEVEVRNAKSRRSLYKRDDKPDLTLLYPEHNISVPIDFFHNDTRYEPHSNGSFNLRYWFDDTYYEPGGPVFVLLGGETDGADRLPFLQKGIVHQVIKATKGLGVILEHRYYGTSFPTEDLTTKNLRFLSTEQALAEVDYFAKNVKFAGHEDKDLTAPSTPWVVYGGSYAGAQAAFLRVTYPETFWGAISSSGVTFAIYDFWQYFEPIRLFGPPDCIKNTQTLTDVVDKHLLGNNTANIQALKTVFGLGDITDNRDFANQLTGVYGWQSTNWDPEVNSPSFYSYCRNVTQSADLAAPATESLRPTVASIVSAAGYGNDTLVQNITLNAISWVNQTVLPGWRRSNYTQDRYFTNLNATALQQHTALEDYGYTS…
KZM27787.1	>ST47_g1047	MRFSEVLAASVVVPLVAAHGGIQGAPKLFGLPSDVKIRTPSPRAARAAAAAQGPHHLLARQGGDANNRCGPSFGNAVCAEGYCCSGAGYCGNTPEHCNAPDCLFNYGPGCDANKTPVGASTRNDARPQKGSVQYGGAGIYNCLKPGTVAITYDDGPYIYTDQVLDQFNAAGFKATFFVTGINIGKGAIDEKWSAVIKRMYAEGHQVASHTWSHQDLSAITEAQVYDQMVKNEMAIRNIIGKYPTYMRPPYSSCTGTCQNVLKNLGYVVSYFDLDTDDYNQLTPEKIQIAKDNFVGNMSTVEPTSGSKLAIGHDIHELTALNLTVTMIETLQARGFKGVTMGECMNEPEANWYRDSTPGTPTPSSTRVSSTAGPTSTPTGAVSTDGSCGGTNGYKCSGSS…
KZM27798.1	>ST47_g1061	MRFTIFVAAALTALVQALPMAEPAAQLVDSKPGSTIELGKPSTAVTWGRRDLVEVKPGSTIELGKPSTVVTWGKRDLVLKPSQSKDTIELSPPSTIITWGERD
KZM27805.1	>ST47_g1053	MPSFTTLGASLLPLTALLTCALATSPYTSSKNETPKDNNADCNCYVVSSGADANTPEYFQYYRFYDFRNLPGGLSQPPGQVNDSMGLEPTWQPDLFDSEDWKYDWATQNWSKPATDDFPVPMSNSYANIYLAEEDDSSYLALRTSREPGYQSSGEMENQQKNLMHVSMRMYGRVVGDKGAVAGFFTFVNDENESDIEILTRDPLDTIRYTNQPSVGKDGNEVAQASIMGTDLPSWEDWQTHRIDWLPKNSYWYLNGKQVAANSYSVPRKQSYMVLNMWSDGGEWSGNMTEGHSAEFHVQWIEMTFNTSGPYEGNQRRASKGCETICKIDGVKQVGTPEVVSVNKSAAAAMSVSWGLLAVVGAAVLFVGL
KZM27820.1	>ST47_g1042	MVSTTILQLLATALAFASVQAGHPAQAWREGKFKTLVTFGDSYTDENRLGYFIQNNGTAPPVGWDQPVGLTTASGGRSWARYASVYSSAKLYNYAVSGAVCSNKITPRPLSPTTLFPDIEGYELPAFIADSKYTRSNGTKFFTGKSDSTVYAIWIGTNDLGNGGFVDDSQQPGKIVSDYMDCVYNTVDGLYANGGQYFVLLNLAPLDLLPQYQLPSQGGLSATQFWPANGRNVTDVHYRMQNTVAALNDVYGYRTPFVVEISKKYPGIKMASFNVNGLMTDIHSNPTQYLNGTAPLNVTGTAKTCATVSGQNCTVNASPDSFEWFDPLHPSEQTSRIVAREFVNVLGGKGKWGTYWG
KZM27823.1	>ST47_g1034	MKSALILSLAGSAVAVPSFGSFIDAMFGGSDNSYASNPSDLPNFPAIGTGSGIPFPTASGAPFPTGSAGASPFPYPGSDRHVKPHAEALHIDYHLAPTVAAAIKKSELKYRQLGGSPLPSFSLFDPSATPTGLPTDLPGLPSGTEPPSLPTDAPTDLPGPPTDLPGPPTDYPTPPAGGPTASFPFPTGGAPFPTNAPFPTAPAGTGYPGLPTTLETLTRGARPTSAPDAPSQEDSQEPQNGNAWLDWVSDLLTGGKDGN
KZM27826.1	>ST47_g1037	MRSIFYSLLSLATLASTLAVDNAADADWEDKVPDTVFNGQTVPPMPVLDIKTLDKDISHGNWLVEFFSPSCPHCRQFAPTYQTAYEFYYTSKPIDAKGEPEGDSLNSFKRFYDFNFAKVDCIASADLCAAHNVMSYPSLIYFRDGKEMARQRGSKDMKGLSQWVEELLETIRPGSRKEGGPKLPKAGDKAVEVGPDTEEVVKEKEKEEVKDKEVANSKLESLKNEPTKESTPTPTPTPTPTPTPTPTPAKATPAKAASTFNPSGVSQPLTAEKFQSVITNTLDPWFVKFYAPWCHHCQALKPNWDNMARQMKGKLNIGEVNCDVEKRLCKDAKVKGYPTMLFFRGGERIEYEGLRGLGDLLDYANKATSVGAGVDDVDAATFKALEEKEEVIFVYFYDH…
KZM27870.1	>ST47_g986	MKIEYSLLTLLSTSLVAAAPAPFVVTDPVVATGTGNVATTVTDLDRRQQVSVYGFRKRTLELRNALLAARGGQRQNQDSDNGREETDAKDAGEQAAEGEQTSDNAAAEQQQQAADVKQQQQAEQAQGADPATDQAQNNHEQQAAPDQAAGDQAVKDQAAQDQAAQDQAAQDQAAADQKAGQAEQDAQQQAKQEAKQQAKQQEAEAKQAEKEQKAAQQDAKQQEEQAKQLQNQAEQDAKQAQNDAERAAKDQQKATEEQQKAQQEIDQAQQELDKAKQQQGQQAAAGNATAIVGGDAAAAANQTQGAAGNGTQAGNDQQGNGNGKGNGRGKGNGRGKGNGRGKGKGKGKGQNQEQGQDNAAEEALQSGGQEQQQGGGLDIGNILSSLLGGGADAGAGAGA…
KZM27876.1	>ST47_g969	MVNLSILVSSLYLASSAVAAALPASAPKTCKNPIVRKEWKQLSIPQKRAYIDAVLCLASKPAISGIEGAINRFDDFQAVHSSQTPDIHWVGHFTLWHRYFINTYEEALRQECGYTGAQPYWNWSLDAEPQNPTSTRIFDSEIWQADTGFGGNGNKVEPTNETNPFGIVGGTGGGCVQNGPFTADKFSVNFPTPHCLKRDFVPTLINVWADQKLVNKVLAQKDYTGFARVVEGEASFAVPNIHGSGHFGVGGALGQAGDANNSPGEPIFYLHHGNIDHIFWMWQQKDLKTRLHQVGGPIIPFDYSGKNVTLDFEVGLGKLAPTVQLRDLLDTQGSTLCYTY
KZM27886.1	>ST47_g972	MHSTFWWLPLIAGAAAIPAVIPVTPTPPSTNSVPNSVYLGFFFSINTAAPSNLLGGLANTIQTLLTGPSVTSPNVTWQTCTAYCSAYKYAGIEGSTCRCGNGFGFTPIRALDAICNLTCPGSAAQCCGATNRLLLFQIVKPVVSSLPAVQPPRPTTTQVPTVPTRLPTTPSLPSAGLPALPPLPIGQLPALGQLPTGGLLGGLPTGGLLGGLPTGGLLGGGLLGGGLPSLPAANPPTGSLPSLPIGQLPVPSKQPTTPGGLPTLPNLGLPTGGLPTLPNLSLPAVGLPSLPIGGISLPTGGLPTLPLLTPPKLPTGGVPTLPTGGLPTLPSLGLPTLPTLPNLGLPAGGLPTLPNLSLPAVGLPTLPSLGLPTLPTLPNLGLPTGGLPTLPNLGLPAGG…
KZM27887.1	>ST47_g979	MGSLFNSICLFTCWLPNILAPPAQTIPGSETDISGKTYDYIVVGGGLAGLTVANRLSEDSSRTVLVIENGYVVDDISTQVPSYANSLNTGLMYDITSAPNANIGGQTKPVYVGNVVGGGSVVNGMAFDRASAADYDAWERLGNTGWNWNSLLPYFKKSTTFTPPSAANVKAWGMTYDASYYGTNGPIQASFPNFEYTDITTIWASYKAQGVPLPKEHASGNAVGAFWIPTSLQPKTQTRSDAKNGYYDPIKSRSNLVLATGKTVNEVLFDYGLLTGYKAKGVQYVSRSDNSVRKVYARVEVIMAAGSVFTPQLLQLSGLGPKAVLSSAGVRVKKDMPAVGANMQDHPNANMQFDLKNLAPVNPLSGLDSASNASAWAQYNANRTGPITQAHGSSLAFLS…
KZM27890.1	>ST47_g967	MRFSTIVSALAVSTGVFAAPTPSELDARAVVNHDSLNPIHTRVQGGAIGRAIERFQPLLHIAHGCQPYTAVDDAGNTSGGLQDTGNVSAGCRDPNKGQTYVRAAWHKGKFAMMFAWYWPKDQPAAGNVAGGHRHDWENVVVWIDNPSNANPRILGAAASAHGGYAPTSTPNRRGDNVLVEYFVEFPRNHALQFTETVGRTYWISDYDVMPNAEKQALASTTIFGDANVPFRPDNFATNLDNAFV
KZM27929.1	>ST47_g922	MKTFVILSALSAAISPAFASVLARQSKGKLPPVEVRGNAFFAGDSRFYVRGVAYQPGGAADAKDPLLDLEGLKRDVANFKDLGINTIRVYTIDNSKNHDEGMKMLDDAGIYLALDANTPDYSLNRETNATLHRSYNDVYLQSVFSTIDAFHNYNNLLLFFSGNEVINQRNNTGAATYIKAVTRDMKRYIGNKSPRTIPVGYSAADVSENIEQQALFFNCGSDDERSDFFAFNDYSWCDPSSFTKSGWDQKVKLYEDYSKPIFLSEYGCITNRRDWGEVAALYSTNMTGVYSGGLAYEYTVEPNGYGLVEVASNGKIEPNEDFDRLKEAFKATKNPSGDGGFKSSGSASECPSASEDWEVATTVLPAMPAKAEKFMDDGAGTAPGLAGDGSHFAGEPSES…
KZM27930.1	>ST47_g923	MFSANMLTFLLLAVTPLLAKAQHNQQTPLKEHGSGLVVPLTLTGGKTYSFLSGDRQLNLEELQDVVKKNRKSFRPQIASISIPIDAAQPGRMTFGYEEFTSQLLSDVGWVDTRIPGADMPTTHIGVRKGGMISKDIFTARLALDTPYISLPSEIYDILVQATNPSPWRHDGSYGNVVDCGALETFPDIVLGLGPDAEEREDGEDNEDKEIVITPRQYVLEDEEGKCILLVHRSYQRGREEAVLGWAAVRGKVLVLDWVSERTGFGR
KZM27936.1	>ST47_g925	MKSTTTLSVAAALLSGSAEAFWRMPCHSRTAFLRLDPIVDPGIASSHGHVIHGGSNFGESTTYEDLRASNCSSCQFSDDKSAYWTPSLHFAHTNGKTEVVPQIGGMLAYYLLLGDDIQPFPEGFEVLAGDSRLRNFSGPVPDPPTSAWDAEDMSQLSLGQKSLGFNCLNYDRAPEGSRYRHFMPDKDYLDANCANGIRAEIFFPSCWNGKDVKSDDHKSHVAYPNLIDGGKCPEGYETRLPSLFYETIWNTYAFKGKDGQFVWSNGDPTGYGYHADFINGWNTDTLRSAVNDCTNPSGRVEDCQHFTPSLQTEAEQGECKIEDIPTALLNDDCGGPSNGLCGNVPVQYGPEYATELQAGATDKPTGGVSITSVAPVPTQSYAPARSKITDKWGGGISVY…
KZM27955.1	>ST47_g917	MKSLVVGAMLLHTMNAQGLAGVPAAAAAPAAALPAVLPAVGVPVAPLNAPAVNAPAPLITPGIDAPSEADLLGLLPSIALPPILGPSRKLPTGTADVIVDQPTSAVPFGAESTPGPGISFGPNGWSVPNADVASANIAAPSPLLARPSVPAALANAVAAIASPLAPLRSLIPAIPIRPTGSPAQPLPAAVSAIINNLPKPSPATGGFGIFAVGDPADAAPVDATPVDAAPVDAAPADAAPVDATPVDAAPVDAAPADAAPVDATPVDAAPVDAAPVDAAPAAPVDAAPAAPVDAAPAAPVDAAPVDAAPVDASPINAAPGETASVVDANPVQATPSVDPSAAPLPVGAALPIGTNPYVGPYDPNSIYDPYSPYFDPNSIYDPNSPYYDPYAAPSGWEGQ…
KZM27958.1	>ST47_g914	MFVRSPRRFAILSFVAFVFILAVLQQSPWAKERVYEQVSLLNSAYKPHQEPIPNQSQEQSQAHLEDAWQHAVPAATPSPPMTKPEPSQTVKSPSSDPVTKTKPLPPWRTAPSRIGTFIPPFPRPTDMKAYMAKMLKWGRPSWDGHWPPFSDYVGKEYDPNRWEQFDMDFSIYNAGHDDLNTTAVNSPIVYKPFPKYNNPEWREKWHGEYVPCLGPRGVALNESTDDEIQAYRGLPHGFPKAYAGGYDVIGLDEDVCFDRYSRYGPYGYGDDQFPEEVKDWRAPETVPEWDEVKWGELQDLCLELNKDRFRPEARSPIVRIPSTALPAPAAASSAFAIPTDTSHSNLENRGKHEKKYHHRTAILIRAWTGYTYEENDITAIRAMVSELSLQSGGEYAVFL…
KZM27965.1	>ST47_g890	MKTSILLTAAALVSGIHGCFLTAHSSTVGDCHGRKSEPKNHGGARQFVNWSKDACNIKGELLNGCTVNVSSTKGCGSVSFSIWKPGRFARGFQATEAEM
KZM27970.1	>ST47_g882	MIMRTSQVLLWFGLAELHQSVDGLPATFCIEASRDIYNPGSEAAGYHQHPRAEVKLGRGLGRRAPPKKGGVTPPKAPVVVPVPQTPVGKGNAKSNTPGAPDKDKDGKGKGSPPPSPAPGKGTDPVTPAPSKKGKFRVYKLGKCGSEDARDEIKNIDSEGNSPPKKRKTSKPPKTPKAPKLKNRPDNDGDDDYVKPHVSVTNLLSVFPGGEFHKGEMLLLPGRLNNKKAPLFSVREHNVMSPVDFPNYSLHRKIHELREIVLLIEYLNSSDVAKYFKTLSLRIQDRLAKIDADGNDAFVRDIDDWWFKQKNNRALKDAPGEQYKSLKLGGRKDVCGAAERNREDLQGQLRDSNEGAEKKNIKKAVKVQAYVIGSVSSPNTSNVSDSEPFPEDDGNSDSDA…
KZM27972.1	>ST47_g889	MFYFLASLLLSHSLGVNARSQPIPIRSTGNPILADGSYFSADPAPLVVNNTLYILAGHDAAPENENSFIINEWEMFVSTSTPDPAGSEWDFYPGIIQPEDVFAWASPGTAYAAQIVEGPDGRFYLYAPVTEAQSNNADKFAIGVAVADSPLGPFKDAHASGPVLSQSKPAPGNDIQNIDPTILVDDDGKIYVYYGTFGDLRGYQFESDMVTPIGEVTTVSTLTGFFEAPWLMKRNGTYYMLYAANNAGPDSPCTPTSYHACIAYGTASSPLGPWTFRGVLLDIVSSTTSHPGAVEFNGSWFLVYHTADADTGGNFRRSVAFDEMTFDDAQTPPGINKVVQTRRPPRPSRPTRNVAPLAKASSANTTPIQYWIAAVNDEKIPSNPLPPEYWSSYADEQSP…
KZM27973.1	>ST47_g888	MQLSILVLSAVGGIVNALPTTLSPIELRSDGRAATLFKHPDLATINADSTFVPANAYCTDISNIFGGFDGNIRSLSVEEGFKCDFYKEAGCGVNDFTSGGAVLEVGFKNKKDERCAAAIEAPRRGAHVWLVLRDPTKMIPGLSESDKESKNYTPFQADLSSPDIVKHAVQQSGATSAFAYTIFDSADNMRSIVDALRKAEVEHMIILPSGSTEVALKESGIPRTAVQLLYPDVKFDYISPIDIDTACGALLNEPRFRDRRETIEIVGRTLGREIEVQEISEDAWYER
KZM27978.1	>ST47_g875	MRFSLVALPVFAALAVAESSTSHSASETPTSTSRSASVSATHSAKPSKASATHNAAAGVAAGELSGLAAVVMGVAAWAL
KZM27993.1	>ST47_g864	MDIRIDDRRSPRGVRLLLALAVASILVGGCSSEPSPQGGGPLPLQPIADIALPGDNSRFDYESLDPDRGLLFIAHLGASEVIEVDIHTQQVVRTIPNLSQAHGVLVVPEPRRVYAPTGDYPDGIAYDPTRGAVWTTNESGGTETVVDAVTAQVRGSVDLGGDVGNVAYDPVSDQMLVAVQGKGDLAALDPGTLAVTRRLPLPGCRGGHGLALDPPARLAFVACEDNAALLTVDLATWQVTGTNTVGKQPDVLAYDQGAQRLYVAAESGTVSVFDHKDGNLAAVGSGHLADEAHVVALDPNTHHTYFPVPAGTDGHPALLERSPLP
KZM28005.1	>ST47_g827	MVLGILTAIAACPAIIGTVEAVRQGQRQSAREKHRGLKTNLSVVCSRESIGGREINGCTVVLSENKLYLNVPSDESPEGHLEDHPFAGYFLPYPDHDWGRQGEGMVSTISNDPPQLNWIYVDRDTCEVKYGDRIASEPHIIGPWDVTKMDRRVMLIGWEGFMAVQYGPGEWALYFDIDDNGLQGVIGDDMSKMEVELVRREMREPKTSTSPVPVEGAEAEANERE
KZM28007.1	>ST47_g825	MKFLITLLSAAGLLASGISAAPLNERGIIRTRAPGTDYDIDDAIVDWMSDPKTKRRIKTACGTVGGWEGWAQLELEAEFREKFQIPENTDIREQSKVFEGRQIADFLLPETATHKGMIIELKCENKNAQSGDGMQKPVGSDKKKIYNVKANYKDHTFMAVAMAFTPKADKALTKVGMKPIPKAEADMGAGNTMRAYKERMEVGTLTKDMDDLEEAFKGLFGSTPPASPQARPKTPPTTGSGAPARPKTPPPTKKPTGSPPPAPKKPNGSP
KZM28017.1	>ST47_g831	MRVSLTTVLTAALGLASSSDALKILMGNDDGFGSGNLRELYKLLVDAGHEVLVVAPAQQQSGKGGTVIWAESANLTVASQYDIVPAGSPSVGRDPDDEHIFYYDGTPAACTFVALDYVLPRYYPEWHQTADLFIAGPNFGTNLGAFVMGLSGTVGATFAAVSRSIPGIAVSASNKAVPFFNVTSATHPAALAAKVSFEVVNEFITNTPPGQAVLPLGYGVNVNIPELVNGTTPPIVKTRLTGNANTDVAVYNETTGLFDWDNVDPVAAGINAAYNGDTSLPGETWVVAGGSVSVSVFTMDFDAPSTKYTDWVFGKVENLFSGSANETGYSKRMVEERMRKRGVMMSGRDAL
KZM28046.1	>ST47_g813	MLFLQQLAVLTLTMSTALVDAQSGSGRTTRYWDCCKPSCGWSGKASVSFPVKICDKSDNPIADLAAKSGCESGGKAFMCTNQSPWAINDSFAYGFAAVKLAGVSESSWCCACYELTFTSGTVKGKKMIAQATNTGSDLGDNHFDLQMPGGGVGAFNGCTAEFGAPSTGWGQQYGGI
KZM28057.1	>ST47_g819	MSLRWQRLVPLLFVILSTFLSFSSAQFGGSEHTHSQQKPLGRGPVPSGSPQSGEQPAWKSRWGTAEKGEARGKGNAAFKEATSLLHKVKPAAAPWWDFDKNAGIVGAGAYYAKELFFLLFMNGPAGPEPFTTDAQPKKLSQPLSQAVQLLEDAAAQKDADAIFTLAELNFYGNYSHPRNYSEAFRRYHELATLDGNASAQHMVGFMYATGIGGAVEQDQARAMLYHTLAAEGGDVRSEMTIAYRHSSGIATPRNCDEAVHFYREVAKKAIAYMRSGPPGGHSMPRESFRIADEEGGVYGEGASASSSGRNAKTASVHSDAYSSLDDVVEYMDLQARKGDARASFNLAKLNYDGARTSKRDLPAAKKRFLELARMYWDKNGKTKQGVSPLTEKLAAKAAG…
KZM28064.1	>ST47_g815	MSPNSSRAAIRFVVALFLAQTFVNAVAVPHPHLHRVTDARQVVSLPLIERRQESAETEPKNVFDAIVDTLKSYNGWQVFTDFFRKLFGGHPSSDNNDNDDEPTVIVVPTPGASGTPINVISAIESFISEIASVTEPVVVIPPGTTDAPGASTTDDPIMSILPIFPITTAINLFPTGEVSLPSELVSELLPETTEVVVVVPPFEANSTEVVIVLPTGVVTAPLVTAPVVTGPIEVAPSATDAPFPIVNGTLPAALPGTDVPVVVIIPTGISSPIGINGSAEANTTVSSTSTIEVTVTIDPTLIGTGVASVGTGLPVTFTEEPLFPNVTAITPTLVLVTGTGASVGTIIPTIAVDPISPLYPNSTSDAATAVAPIGTGIVIGTGIQVGTVISSFSPIETIV…
KZM28083.1	>ST47_g775	MTLKPFLTILFLAVAIFAPVSFASASGRYDPYNHCGAPFCGSVGAAAGAGAVARIDRKGPTGDLHEKHTEALSKV
KZM28085.1	>ST47_g778	MRFANIAACISSLLVVTVSASTPAAFEVPGSVPGTAAAPEVDTTIVFETSTYYLSSAIAVTSDTVNSTAEVTKTGYAPPPVEPTTTSEASLYVTASQTFVPVTLWEGSTTRVIFPQNSTAVEIPTGVPANGTSTVIVTATASSSEPVVSTTAKNKTSATASASASVSQVPVNGAGKVTGSALLGMGIVAGFMALL
KZM28118.1	>ST47_g753	MRLLTTLASLCILPALASRPVGGGHGSTTPLSLQMAESIMSRQQGVYSSAGDPSGALQAGFVQKTFSRIAAQYPQHASTPGIASYVARSADSLLGIFNSSSSALRFPMDRLSSGNAMIRLYETTGESKYKAAADVLDSSIAENRRNAEAGLWYYVYPNWSYLDGLFSFGPFWALYTLTYSPRSSSAWSELRRQFALVAAHCSTDGEDGLLVHGYDDSRTAVWANNTLGQSPHVWGRSLGWYVMALVDTVEVLDADSQASTEAVRDVRSWLVDELRHRMRAVAQAVDPASAGWWQVLDQPGREGNYIESSGSSMFVYALLKGVRLGYLEPRSPGLNASYVDVGRRAYAYLEKRFVVDNGNGTLGWNGTSSTVNIHIPPETPPPPPKQRHDTTRLDTTRLD…
KZM28119.1	>ST47_g733	MKFSLAFVSAAIAGSALARPSTLAGRVQSRADGTRRHRSQPLVEVGSTFKENAKFVEGLDNSTAHVEYSSNWSGAVLEQPSSGYFTSATGRFTVPTPKHVGSDGDESGSAWVGIDGDSCSSGLLQAGIDFTVTSSGAVSYDAWYEWYPDYAYDFSNFAVNAGNVIQVDITATSTTKGTVKLTNVSTGKSVSQTLSAPSGSVLCRQNAEWIVEDFESGGSLIALSNFGTVVFTQASAALSTGGSESLSSATILDLKQDSTVYTDVTINSDSQLTVKYV
KZM28121.1	>ST47_g731	MLFLSLALVTALAPAVLGCPQHSNNKRSHLQGRQTNPTQNPNANTTQNIWTYEASFNWGKLSPDYRLCQTGTQQSPIALSLGNGLSLNHVPRFNYTGAVAGNFFNWGYGPAFTLAHNGDWTSHPSFSYDNETLYLKGWHIHAPADHSVGGDRSKAEMHFVHVDSQGHEAAVLAFRLDPGNFNSTFFDQLPPMIGFDDMGTQEPVELDLTLAMESVQYFNEFWTYQGSLTSPPCHEGIRWFVARQIMFTGVEQMQAILGASTYSARAEQEVWQHRINE
KZM28125.1	>ST47_g735	MRSAALSSLVAGAAALNNGVGKLPKMGYNTFNAFGCNYNEEALLDMAHSMVDEGLVEAGYNSIIFDDCFTKKERGDDGKLLEDPERFPSGMRSLADKLKGLGISAAAYSDAGYKTCAGYPGSYGHEEEDLQTFSEWGFDYLKYDNCYIPFDSEVQENVYDRYVRMAKAIASRAAKKDEEPFWFSIYEWGWQQPWIWGKRLGHSWRINGDIKPWWNSLAAIIDNASFQY
KZM28131.1	>ST47_g726	MRFSLATIATAALVFSASAAPHGGIGKRGDNTDIEERGGKGAVRGRYADGTFLSGALGSRGATDPVKGLLPLSSPAAFLKVRKDDSDSSSDSSDSSDSDDEESNSDKEAEEEGDSSSDDSSSGDKETSSGSGDEESSSGSGDEESSSDSGSSDDQDSSSDSDSSSGSSPSGSSNSTGSSTPSSGSVASGTFPTAAGESTLSAPMEVTDFDGGMVKFGRGVSCTSGEGGGKDAVFNVADGGSLSNVIIGADQIEGVHCAGACTITNVWWEAVCEDALTFKGNGDGTVSGGGAKGAKDKVVQHNGIGSISISGFYVEDFGKLYRSCGNCKEQGERHVKIDGVKASGGSATLVGINSNFGDTATITNSCVTGTKVICQEFEGTSPGNEPQKISDGPSASCIY…
KZM28139.1	>ST47_g702	MSLVLRLGAVLLSAAGFIAAVPVELEKRAVSANILDQLQFFSQYSAAAYCLSNNNSPNTKITCPQGNCARVEAANTNTLTEFENSIKSDITGFVATDTTNKLIVLSFRGSRSVRNWLTNLNFPVAPTTICSTCSSSIGFWQSWLEAQTDVLAAIKKAQAQYPSFKVVATGHSLGGALASLAAGFLRSQGTTIDLYTYGAPKVGLEGLAKYISDTSKGQTYRVTHKADPVPKLPPALLGYHHTSPEYYITSGNDAQPSTADVNVLTGTLNLGGNEGDFGLDVDAHLWYFGNISACEGQEGIEIRGLRDN
KZM28142.1	>ST47_g709	MLAKSATSLALASLVLQATAVSKKQWSKRSDHLYLPKKTSDYKTATAPNNVTIRYKNPGICETTPGVDSYSGYVDLTPDIHVFYWFFESRNNPAKDPFTLWLNGGPGSDSLIGLFEENGPCMLNDNLTTVYNPYSWNNVSNMLYISQPVGTGFSYQKQGVGSFNPLSEDFHYNSSDWPATGRWPLSEPLNAGKIDTTDLAAAATWHVLQALLNTIPKFDTKIGTPQEFNLFTESYGGHYGPAFFNYFYDQNLKIENGSMPGYPLNFNSLGIINGIIDESVQAEYYPEFAVNNTYGIKAYNDTVYSYAKFANNMYNGCLNQIALCRAAAEGNSSYYHADAPITEVELTPGVVQICNEAADMCRDNVESPYYYYSGRGVYDIRHPYSDPTPPPNYPRYLNL…
KZM28146.1	>ST47_g705	MGFSRFFGVAFLSLVASTQAIVSSTGFTVSLTDIDYFLPPKPVARIAGCEEIKAAYADGPFVPFTVVKSHESGTLDTASIAAQFAEQDDVWQEGFLDALYVQGGSKSNVSTVVITGTVFGELKPGPYFINAAGQVYEAWRLYSDVTGAFTESAIANGDGSYSVLPAGTVGQKTALAVPSRLYFSKTAEKPLAGVRIGIKDIYDIKGLRTSNGNRAWYWLYPAANHTATPVQNLIDAGAIIVGKMITSQFANGETATADWVDYHEAFNPRGDGYQDTSSSSSGGGAATAAYAWLDASLGSDTGGSVRGPSQVQGLYGNRPSHGLVTLEHTMPMAPVLDTAGLIARDPLIWRDAAQAMYGSNVTISDAYPASIKTLAWPTEASNAANALLIDFLKSVTDFL…
KZM28147.1	>ST47_g700	MNSSWIVAASTAVMLAFCYDFKSWQSLGTGGTPPTLQGYLKIRRWGLYLLYKRQNLLDSSPIPDTGTSYIKPGKLPERPGLPPSITRWTLPQRQHPQHITEGALSKLKNLMQTFASTSPYSEYIETRPSKTEGGTGPAIYVKPDVKTINPVAHKIFYEVAHVHPSENSLHVYVSPKDAKTVVSRGWGQRFPVTWLAPPSWIMVYAPRNEMELEVVKEIVRAAVCYAVGMEVSDLKP
KZM28149.1	>ST47_g698	MAPSLRSLVSFAAVLPFVVAVPAVKRDDVSSIKNKAYDYVIVGGGLTGLVVANRLSENKFRSVLVLETGPITEDINTVIPASGNNINSAMQYDVESAPDAALDGLSAPVLIGRVVGGGSVVNGMAFDRASAADYDAWEQLGNPGWGWNGLLPYFKKSTTFTPPILAKEFNITHDASVYGKNGPIQASFPNFEFPDVKVMWEAWRAGGYPTPKEHAAGDAVGALWVPTSLDPKTQTRSDARRTYYDSVKSRPNLKLVTGVEATEVLFDKLTAKGVLFTNLADKTTSRVYAKREVILAAGSVFTPKILQLSGVGPANVLKAAGVKVKKDLAAVGANLQDHPNADMFFSTQNLSTPNPNFATDPVQNATAWEQYYANRTGPVTQSHGSSLAFLSLQSVASDY…
KZM28160.1	>ST47_g695	MRHSFIPALSSLAGSAIALPAPQAFALHGPVDPSQVVSDQVLPTGSSGSLHGSEALIGFASSNPISTESTVIPTDEFELGPGQSEDADLGLYIDLTNVKNPQPIRGGTTGPTDPGPRTDAYDALNSDLFAPPTTDSGDVKNAKWPFGLSHNRHGLAGAGWARSQNSDQLPIATAMAGVNMRLSPNAYRELHWHKQGEWALMLNGSVRIQSMNEAGQTFIDDVTAGDVWFFPPGIPHSIQAFDTGCEFLLVFDDGAFSEDNTFLLSELMERNPKEVVAKNFRTSTKTFDSLPDGQLWIFPGTPAPANISEQNVTGPAGIIPKQTQYSYHFSQQEPLKVPGGSIKILDPTTFPIADSFSTALITVEPGAMREMHWHTTSDEWTYFIQGSARLTVYQAPASS…
KZM28182.1	>ST47_g678	MPSVSTILMGLFVLAPLAAAAPAKLYARQEAPSPAAASPTSAAGAPAAMATLSDVDILQFALTAEHLESTFYKQGFAKFPMSDFMKLGLNEGQVKSLMGVGMTEAIHVTTLMSAITGAGAKPVEPCEYNFDAALASADSMVKTARVLEAVGVSAYLGAAPMVNSSAVLAAAASIVTVEARHQAFIRIASGAEPVPAAFDTSLQPRAVFTLVAQFIKSCPQGSNLNIQAFPAIALQNPEKATVGQNLKLADPASPAGASFCAFVAPGGNQFSQIKDGNCMVPQNLQGEVYMMITKTESVKDDQVLAGPSVIQPS
KZM28186.1	>ST47_g674	MRFSDLSLAVLSCASTTLAAKNTTKQPYSTWMATSFLSKNFVIRQTYVPAVTLEGIQKAAAANSDEDLLEYARSSVSSLVSENGTVTGYNDTYYTLDDIRLGNNVLHWWNEGGRKESKYEIAAHRYRDQLNRWPRTPEGGFWHRAPTYANQMWLDGIYMADTFYATYTSYFDNDNITAWKDIELQFDLIEEHTRNHTTNLLYHGYDELKKAVWADPETGASPYVWDRAVGWYFVALVEVLQVYPKELPGYAKLQEYFTTLAEGIKNVQDAEGGWWLLMDPELEGKAGNYIESSATALFTYAYFKGVRTGLLDSQYLPVAHKAYELMVDDFIIYEKNGTLSWNGTVEVGSLKGDASYEYYTTVPLSLNDGKGAGPFMYAASEFDLATKNATN
KZM28197.1	>ST47_g683	MAMRRLTTLVSIALTASAQSTASSACSSTIAPRNAAPSVAPGFRVEVVATNLTRPRSIHFDSEGTLLIVEQAQGDGSVENVIDNTNQLNHGLALSEDGRTLYASSAGAVYAWDYDASQGQTTSESRQIVGDFGPEDGHVTRTLLLSQNVPGMLLVSRGSGPNVDPRALDRSTAISTIKAFNVTNATSEGYSYINNGMLLGWGLRNSIGVAEEPVTGGIYSVENSVDNFQRGTELINENNPGEEMNYHGYLNGTQPTQQGGNYGYPTCYAAWNVSEIPDNEGITVGSQFAIGSQNDTVNDGNCREEHVAPRLAFQAHMAPIDIKFNPNGTGAWVTFRGSWNRESPIGYKISFVQFDGNGSPIAAANSTTAAVDVVYNPDLTKCPDNCFRPAGMAWDSRGR…
KZM28215.1	>ST47_g607	MSLWIRLFFIAFLFTLLSQVSAQTGSSATLDTPPITSSATASATATGTRTPTTSAPNVSKTSTAPDVLLQVPELHVGRIELVVEKLQADLNLNAKVAGLVQINAGVAVSVEKVNITIADVDVNLELIVRLGNLVNIVERVFDSLDLNPLLLSLVGNVTNLVGEVIGAVDGLLGSITQGGKTLNFLVDNLGNIVQEVVGGGGDALSQIVGNYKLNMTEVTGTVKQVGQGLTQKTFSYEPLNALIDIVTNTAGQVVQATVQKPSSSGGATSTPSATATPVTLPISSSTGAV
KZM28216.1	>ST47_g606	MRAFTTVLAVLLPCAVLGQLTDSDGYTGYKLDIREDGDPLAVVYETENTTPNVSALVPEPDVVLNASVHVGEIYIGVDNLTARINLDAQVLSLLSFNAGVDLSIDKVSLLIQNVTAKVYLEARLTNLVSMVSDVLDSIDLNPVIAELGNGLGSIINDTAGLIGDVTDGLGSGTNSTSSGSPTSAASKRSEDLMQFDIKNNILYSANDFSGNTHTRRVLAQNGDIIEQKLNNYGSISNERVVGNYQKNMRFNGFNESVTFKGEEVREEEYVYEPFKGLFSIVGVFKNKSTGEIVGTQLLAEARGGGSATIGNEQDLG
KZM28223.1	>ST47_g609	MHFSTIALATLVSIASAAPAALEARFPKGNVLSPSTISIYHSSNGAIDYGVARGEVSRNNWDGRDNSTLVTFDLNGKNLPENCFLRFWLESGTQSSSPTSGSFWSGTGLIDVFSSLQPAPKEGSTGWGGPGNQRNNPLGRMKVNYNGDATVLDFAPNQLSGFKCPKIGDWNVKNGLVGYELVPAGDQDRVQWDGTVSGLYLNW
KZM28226.1	>ST47_g642	MLQPLTLVLSLAAAAVAVPTSLTVRAGRTSPPAGCLTVGGSGTYKTVSDAVAKLSVSGTTAQCIFIYKGTYQEQVYVPPLESALAIYGETTDTSSFASNTVTITQGKSQDDTPKNDLTATLRAWSPNMKVYNINLVNTRGKGSQALAISANADKQGYYGCQFTGYQDTILAQTGNQIYAKCQITGSTDFIFGQKATAWFDGADIRVLNASVGYVTANGRDSDSNPSYYVFNKSKVSAAAGTVVKAGVYYLGRPWRNYSRVVFQKTNLSNVINPKGWAQWSVNDTRTDKVTYAEYHNTGAGATGPRASFGTNLSSAVSISTVLGSSYKSWVDTTYLS
KZM28229.1	>ST47_g644	MSRVRAIFAIVLALVIVGVTNPVPQTTTWNLRDSQLYSLRANSPGKPWNGRYLVNLPSTKRPGLENFTVHSETPPLKFLPIRLRDNDNKYALRGGGWGNYLSRAPLAALTNNATRTVTLKIVYLPTPLRESFETQTDACPGGYDCTADQWTLGGLDYDVYRDFRFGGFRGRWEPFKDVDKEGWHVHGKGNTGIQHPLQFDLVPVIKVVARID
KZM28233.1	>ST47_g625	MARLTATLLLTALASAEYTTTVWMNKVGNFDKYGYVASVVDADAQHITMVLDYDNRTNKSALNIGDSNQRVQCTQPPREQSNDDVQCTQASGLQRRGNHYIHARLVTGDGDYDTSMKHQRRSTGFRVDGPVHNPG
KZM28274.1	>ST47_g582	MFSLAFSSLGLFGAMVFAQDRCDAPYPNVYCNTTEILAYQYDDCTPYHVFVARGSDEPYPGRLGNITSEICKGIGNDDCSFESIEYPAKSTAWGVDEWCKSAGKGAANGQAQVKAYAEKCSDSKLILLGYSQGASVTQDILGGGGGQVFECTQDTNPALNRSTSPGANVVAAVTFGAVVRSKNQNFTVGEGVNYDGTHARAPEHLEALQRYSNVFLDYCHYGDPICAVGSEPANVTAHLDYFLEHNEEVSKWVVGKAKGKAVNVSSQSTASKGLTPAEATVGAETPVSTGTLATGSSTARASQTSSASNNGSTGAGNIHSAGDYVASIMIIFGTTLFSVVLL
KZM28278.1	>ST47_g578	MVGRTALFALALAPFAVAQVSEGFEQGWNQTTWTTYAPDCNQGGKVTLDTTTAHTGRNSIRVDGAGGYCGHIFVGTNKVPTGDVYVRTYFKAAKAFTDSHVTFITHPDPAQGTNKHLRIGGQSKILMYNRESDDATLPDLSPQGIASSVSVPVNTWRCLEYHLGTDGSIETWFNGTAVAGLTSKPGVSNPNAAQWQRSSIKPKVTGVYFGWESYGGDTNTFWYDDIVVSNKKIGC
KZM28289.1	>ST47_g566	MVHLKSTLLASMAAAPSAYAWGSLGHTTVAYIAQNLVSPDTKQFAQRILSDTSASYLANVATWADSYRYTAEGTFSAPLHFIDALDSPPKQCNVNYDRDCPEEGCIVSAIANYSTRAVTEDVGLAEQQKALKWVIHFVGDIHQPLHVENLEVGGNLVNVTFNGARTNLHAAWDTAIPQKLAGNYSLANAQKWANTLTKEIKTGSYSKESKTWSKGLEAKEPVDSAMVWASDANSFVCTTVVPNGPDAVRNQELSGAYYESVIPVVQKQIAKAGFRLAAWLDAIVENAGEGVAKGDDGKYGLSKREFAFEAWQLDAKAKRAAFGPDCGCGEEHAH
KZM28291.1	>ST47_g564	MRATLFSLALFAGTSLAHPRKKASKAAYEQETLTLDEIHQAALAEGGVVTVWHGGDEKNQQDYLKQAFEARFPDMTLNITVDLSKYHDTNINTQLAEKSVYVDSVILQTSHNFPRWKDEGALLNYAPLHFDNISSVFKDKDAAYTGVYIFALSIQGSTDKTASLPKSFKDFTKPEYKDKLVLVYPNDDDAILWQFDLLLEDPEYGMKWFDALLANNPRWVRGTATAPTIIKDANSDRLATFTSVHSFAPAPAGYSDELSTEGTFVSWAQNGAILKDAPHPEGAKLLLNYLLSDEYQVNFGWSPREDIAPPAGVETILKQPRTHAAGFAEFMSNRAKVERRRFFYESKLHTAQGISPLEDEL
KZM28292.1	>ST47_g565	MLFNRLSLFAAYGALSELACAQFPPALEGVTVLDSHIEDGIRISYKENDLCETTDGVRSYSGYVHLPAGALADLGVQNQTYDINTFFWFFESRKDPANAPLSIWMNGGPGSSSMLGLLRENGPCYVNSDSNSTYLSDWSWNNEVNMLYLDQPVQVGMSYDSLTNITNNIDTGDVDVADFSNGVPAQNASFYVGTYASQDANLTTRGTENSARAFWHFAQVWFQEFPQHKPNDDRISIATESYGGRYGPAFAAYFQEQNERILNGTWDEQGQTHLLHLDTLLIINGCIDRYVQWAGYPQMAYNNTYGIKAYNESRYEGVIDALYRTDGCLHQIENCRNLSLAYDPTNQGFNESVNTVCQKAETFCTAEIRDPYFDSDVNYYDISAPGAASFPAPWYAGWL…
KZM28298.1	>ST47_g561	MRSDLLTAQLLTTALFTSATELRAPRSDFDALLPGRKIVETRSQKSQCRLPAIPSVWLSSGFPDTMALVPLNGTNTTAYTWPTNCAPSTGNLSTFMLFVDFEDQPAQFDESPQHLRDFYVPGASEWYEKASYGKLHLEVEADTSRFFRMPASAESYGLSRGFNSSAHATYLLDAIDSYENATGRPVPASDVFYVVAARSAWRISQTAAYMASVLYSRSGNLVSRKAVTFGQDVYDSFNFKALNHETGHTMCLPDLYLESGSAQDLTGGFDLMGWINGQSNDYFAWMKWKLNWITDEQVDCVTASGSTTHTIYPLERDDDHIKAVVVKRKDSDTEALVAEVRTTEGVDKGSCVTGVLLYTVDTTIASIEGPVKVLDAHPETDGCDGVPKNDAVLTNGTSY…
KZM28299.1	>ST47_g557	MYISTLLSTSIVLLASAVPSQAQTCNLPSTYRWSSTGPLATPKNGWAALKDFTTVNYNGRKLVYGSTASTGGKYGSMNFGLVNNWSDLASASQNAMTSFNAVAPTLFYFAPKKVWVLAYQWGPTTFTYRTSTDPSNANGWGAAQPLFSGKITGSDTGAIDQTVIGDSKNMYLFFAGDNGKIYRTGMPIGNFPGNFGTASTVVMTDSRNNLFEAVQVYTLDDQSSPKYLMLVEAIGANGRYFRSFTATKLDGTWTPQAASENNPFAGKVNSGATWTNDISHGDLYRSNPDQTFTVDPCNLQLLYQGRDPNNVPSDYNLLPYRPGVLTLQK
KZM28304.1	>ST47_g553	MLNVQIQVSSALRAMLVTGIILAPAVMATPAVQDLVDLRVVINAAANTIGDLNNPNRGWGLFGDSSQMGTANLINNVTSTILQSKFQIDTNKTAWLDSMNVTNATDPSVNTTLPSAWTPTLPLSSSMALPSTLPTSTPTLENTTTDLSTPYTDYVSSIPNLSTSLTSLGRAWHREMNSPVSEAIGVLQESITTLQTTMLQNELIDSSAILRTIRASGSLESAQQAWSRFLNLPGRAGGSDLSEDDTLAPGKRSVQRLAPANGKQYTHKELWGRKELSKIGEPNQDDAIVEWEAKAEDLKRGTAQPFSA
KZM28331.1	>ST47_g528	MKSFTLPSLALLASVLPTAWAQTFTACNPLNTTGCPNMQALGGNATFYWNKTGISSDGKIWKKQNQGKIDWSEDAKGATFTIERSGDSPMVQSKFYMLFGRFEVIMKAAKGKGIVSSAILQSEALDEIDWEFLGSNTTHALTNYFGKGNTTSFDRGKEYEMDAPQDKFHNYTIIWTEERIQWWLDDKMLRELVPADALDGKNYPQTPMNIRMGIWAGGDVNNNDPGVVEWAGGETDFKEGPFTMTVQSIYAKDQTQGAEYSWADMDSSGSYKKVKVINPTGKSDVLKEIQDPSGVRNNWKALSPGAKSGIVIGAIAVFAILMCLLLFCCIKQRRAGKKEHAALLAGEQKEAAELQEYKKQMQSGKFGFGSNTNRV
KZM28347.1	>ST47_g498	MAFVSSTGLILLLGVLAAYLINKFVTSKSHEHPLPPGPKGLPLLGNVNDLPKPGGGLEAHHWLKHKDEYGPISSVTVLGQTIVIINDAQIALELLRDRAQHSARPHMVFASDMIGWKNTLAFSGYTDNFKIHRKNIASVAGSNTSLKLFDRAQEEESVHFLLNLLDSPENLFDHIKKEAGAVILKITYGYTAEPKGKDHLVDMAGKAMHEFSDATIAGKWPVDIMPFLQYLPDWFPGAGFKQTARDMARQLQQTTEQPYEFVKQQMREKKHKVSFLSQALENIGSDAGMERIHKWSASSMYLGGADTTVSSLMTFFLAMTVFPEVQKKAQEELDRVIGGSRLPNSTDKGKLPYIEAVVKETHRWHPVAPLALPHAATQEDVIHGYRIPKGALILPNNWW…
KZM28348.1	>ST47_g499	MKVLATLIVSTLLSGQVFAQQDFLSRLPPCAARCFSSNVPQSCPAGDFDCICADTTFMTTFTACNAGRCSVVSMLQATNETYAACGIPVRDKTKTLIGPVASLGSLALVMVAMRLTDRAVSAHAQLGWDDLLIGFSGAVSIGMNVPVIVAASLGFGRDMWGIPAHNITESLKWLYVAYFMYMLAEALCQISILAFYLRIMVKPRLRTIVWTLLGVVVCFGIANVFTMVFQCTPIPFFWDGWRGEMTGFCGVDVRLFLKGFARGAIEIFLDLAILTLPLPMLAKLNMSPKKKLQIMSMFCIGFIITVVSCLRLWSFVQFAHTTNPTYDNVSGLYWCATESNLFTVVACMPALHAIFHKALRKVRGISTYASHGQYASEGPSKGSYLRHNTDQRRNPVPFG…
KZM28350.1	>ST47_g497	MRLAMLTALSVLASPVMSAGLQPHAGPRAATTQDFRSVTFNIRYAAPASTNERPWSVRGPLVTSQLKNTTATATSRGSIPVIGLQEVLHQQLLDIKAGLGSSWSHLGTGRDDGKASGEYVPLLYQPCVLRLVSSTQKWLSPTPDVPSFWPGAGSRRYVIVAVFEVVATRRLVVVANTHLDNASQTARIEGVKIVLSTIRAVRAQYGALPVVLTGDFNSAPGSGDAYGTADQDGLLGELYALAKPEQRFGPEGTFSGFDPSAEPNDRIDFIWLGPNASTTWEVERYEVLGNVVGGVYISDHRAVVGDVRLL
KZM28364.1	>ST47_g483	MQYSTILLSALFATSAMAQPARRQASDTSIRVQLSGPGELATQTAFEEGSRQVKRPVGSSGPYDTVALEVGKGVKQQGLRCQVRDEHNKPIVVLRGANRDTTFADGDAGSWSFEGGAQNVIAIICDPAFVKGIAPRANKTIVKQPKINARISGLSELARNIAFNQGGLVREVQRVGGPGINTFELTLDAAVKKQDLRCQVLDAAGAPVTGKRGANVDITFADGGNGPWTFINAQGQNINVNTSAVICDPAFVKASA
KZM28375.1	>ST47_g503	MRVCTLTIVAASSLWQADAAKIDRQTVEHAADTYDFIVIGGGTAGLAVASRVSIGLPNSTVLVIEAGPDGRQEPGIYIPGRKGSTLGGRYDWNLTTVPQSSANNRTFAQNRGKVLGGSSALNLMSWDRTSIAELDAWEKLGNEGWNWKSLYPAMLKAETFLPSPEYGTQGVGRTGPIQTLISRIFPRHQSSWIPTLNNLGLATNKESLDGHPIGVSTQPNNVSPNYTRSYAPEYLKLAKDNLAVRLDTRVTKVNFKSKTATGVTIEDGTIIHARKEVILSAGSFQTPGLLELSGVGNATLLKKLGIPVVKNLPSVGENLSDHIRIQSSYQLKPEYPSFDVLKNTTRAAVELAAYNAGQVSLYDYTASGYAYFPWHVVSNDTATMFRKLVQGDTSLDTAV…
KZM28380.1	>ST47_g457	MAPYRDSILAAATLFAGAAAISNGLAITPPMGWNNWNAFGCDVSEGLLYTISEQILSLGLRDLGYDHVVLDDCWQDVKGRDENGKLQPELSKFPNGLKSISDHLHDQGLKYGMYSSAGEMTCARFAGSLDHEVDDANSFAEWGIDMLKYDSCYHMGRIGTPQISFNRFKVMSDALRATGRNILLNLCNWGEDQVHTWGMSIANSWRITGDIYDSFTRPDDLCGCNTMAPGDPSCIAPGTHCSVLFILNKVAPFADRSIPGGWSDLDMLEVGQGGMTDEEYKAHFALWAALKSPLFLGNDLRDMPASALTIINNPAIIALSQDPHGRSVTRVRRDTNVAKDQYGEGETHVWAGYLQNGDEVVILFNAAAEDLDMKISLAEIFTPFGPGGSAPHVKYDWAV…
KZM28381.1	>ST47_g454	MRPSQLLAAVLAMSSLTAAMPDAFANIHGLGDVRNIFARQDNKPASDSASASASASASEQQQSSDQPTRTTAAESSGKASATNSDNNDDSKTTDKASASGSQKASGSKTSGKSKVTSYDNRLPAGGISMVTPGPLAGPQFYKVGDNVTFAWNYTSLSQTPSAIDILASCTANQATYTIAVNQSAAETSVVWNTNLTRSGQPPFLTEKYTLLIYDAQSSASAAPRAGYLAVFNSFTFGMYTPQPYVPLDEFSCAICNGALSHTEKMTLRAVLLTTGTTLGSLLYFTYTFGLW
KZM28388.1	>ST47_g438	MHFSTLAAVAAVASFVSAHGGMGLPKIAGINIRDLKSRDLLANLEARIAEAQTAHAHENRLNIRQDDRECGAGIGSCAAGQCCSGAGYCGTEPDYCYSPGCDYKYGSGCPENITPAGTNTSTVARTKVGSVAYGGAGVYNCVTPGTVALTYDDGPQKDYTSHVLDVFRTYNAKATFFITGNNINKGEIDTTPEYVSVIKRMDSEGHQIASHTWTHLDLSAVSSIDRKQQMWKNEMALRNIVGKIPAYMRPPYSSCTAASGCEKDMADLGYHVIYFDVDTDDYNQDDVNKIQNSKNNFKGNITANGASAANNQWLSIGHDIHYQTVYNLTDYMLSTLTGLGYKAVTVGECLGDPSANWYRTAGGAGSGSGTTQPATSGTKTSTAPAATGTKKVSTDGTCG…
KZM28403.1	>ST47_g442	MMFSTRYIALAAIVSTLANALPFDTIKRRVLVPREKSYAVINVDGGSSTGGPADATTIVEETTKTVQVTDPGPTITAEVTATVVEPVPAPAATSTSTSCTSSSTSQSSSSRPTPTWTSTTIIPTSASPVASTSIETPKPVFVTVTITDDAGPTEYYDSGMWHTSYRIKSFEAIATTSLVSTPSSITSASTGLPAW
KZM28470.1	>ST47_g375	MRSSNTLVIGTLLQFPVALSYYHSPAADAAPTANLDTLFQYTTSRNHKVISQAVEFVVSMQTAPTCTRMAASHLMNECKLLEHAPDFAKSRPEAYLDNVKTEYAAKLAVCELLSAQPPSNAIPPLHCDILVPSSRACSKGGWWSQAPTDSDKQCYAEYKEYQYSQCLKTLQSSPQYWTSFSNARQNAVVMCQASRDAIERENHLETFKNLTQVMGAVSSSLKHTTDEYATLLHDQKQFSDELRESQSQFKEDVSAVQDKALATVNTLDDKFHTFMEGSISELITALADGQSAEIVRIREQMQVFSQDMIVENSLLAKSLTTELQQHHDRAIISLQVNHQAQVESYRVLSGYMGDITNAANKINDTTKSSLANIDNIEHRLDSLTSKAENIARGFAFFSS…
KZM28483.1	>ST47_g326	MRLRATLSAILVSASALVHAAPSSTSQKRSVDFNWGSTKVRGVNLGGWLVLEPFITPSMFESHSTPDYAVIDEWTLCEKLGKQGCYDALKPHWDSFVSLQDFQKIRDAGFNMVRIPIGYWSYVEPWGPFTSGAAPYLDKAITWARETGLKVVIDLHGAPKSQNGFDHSGQKLAYPAWGDADSLAYTHQTLTILNDKYAKPDMQDVVVAIQPLNEPFLAMVPQDTVRQFYRDAFYNLREVSDTPVMFHDGFVDPSWMNGFLTPQDNGAQGVIVDHHQYQIFGDGLVGMGVEQHLGMACNAVDTYATSDKWTIVGEWSGALTDCARHLNGFASGSRMEGSYAGASYVGSCTGKSGQVDAWSQAWKDSVRRYIEVQLDAFEAKTQGWVFWNFKTEGSAGEWD…
KZM28494.1	>ST47_g341	MHPSVLVLAAVAGLAAAHPHNDNVVRAATNTALQTTFPKSSGTSALAAAKTIAAKATFDGGMKQWDRSTNTCEGQTEGGDKDAVFILQDGATLSNALIGPNNGEGVHCLGTCTLNNIWWVDVCEDAATFKQTSGTSYVNGGGAKGASDKVLQHNGGGTVAVKNFYAENIGKLYRSCGNCSKQYARKSTFTNIKVVSGKLVAGVNGNEGDSTTITNSCLIDTKFCDLYKGVTSGEPTKTLSGPDGKTCATSGIKTTMKHRLSSLAFARISTAPRTLHTPLLSSLSVRSSLLKGAAARPLQPRSFAVTARLGLELPSKNSGSYEDSNARPASELNNNITQEEKDDFARKLREDKGKQIRTPWHREGSDRPPVARQRSAGAMTKGKLLTTPSRMLKIILPLT…
KZM28519.1	>ST47_g313	MHTGIFLLFVTFSLSFTAAGLAIKHGVPEDGLLIQRRSPVVVDASRHVIERKSIIEDVPAPVVESGLSTVTDGEIMSKDDASASDQDPTTILKTRDQGHRDDDSQRRTADLEQRADRHGPGYGRRSDNLEQRADRHGPGYGRRSDNLEQRADRHGPGYGRRSDNLEQRADRHGPGYGKRSDDLEVLSERRGGEYGQ
KZM28559.1	>ST47_g301	MRYSLLIAAALPLVQGVRIVQSNDDGWAEINLRTFFNVLNSAGHQVVLSAPAENQSGKGSSDATPEIVDSDGCIHASCPGGSPATGFNASDPRLNYVNSYPVTSIKTGISTTAPKLWSGAAPELALTGPNVGGNVGVQVPFSGTVGAATYAAKTAKIPAIAFSGQTGDPTAWDQPTPLYSKIYADLALNITTTIINSGKPYLPDNTWLNVNFPAVSSTKCNNVNQFKFIFTRVNTGLVGSAPDITVCGTTARLPWEADVAVIRGNNCYVSISPGDANDKTTAAAAQQQIIYDKLKSILSCLS
KZM28563.1	>ST47_g295	MYSIIILGTWCAAVFAAPVTQSSDTNSTWQLAEGTKTMCDSTSDKIIGFYVGPQMESVLTEACVAMMPPCAHQDRVANDTMCAQVTDWRLDGPKNSTQSANVETAEGNKISGWDVKLSVTPATQPETSAGVFWTSQDCYGYFAYMLEKWEPEGCHTQQGFGVGNITVGGQSSLAGTVFKVEIVAEQ
KZM28564.1	>ST47_g290	MRFSSIVATLALTASASAWKIPQGTEDGVYKVDTLEDGSTVHTKIVDAADIDRSQPEVQGISLVPDETSSLQKRGNDQVWCGCGYNMVSGDCDAAVADLKTQLRPSTINPGQAYYSIRGKVVAFACNRGNRNWTVFPQNLGDSLADITNKCGWYIAGAKQTGNDDQALLLGYQRWNGNDDFCGGARSSSQNHC
KZM28565.1	>ST47_g291	MRFLASLTTLLLAPAAVLAGWGYSDDGKNYVIDTNANLVVKVSKTNGDMTSIKYRGVEYNGQGGKNSHVESGLGTSTVTIKQFSDPNVIKVNIKYGTLKHDLVFRYGNPNVYIFMNKVDSSVTVSRYIVRVPPNIFTNNLSSDTDWIPEGVKVIEAGDVNSVTSNSHTYSKHYSGYKYGRTMDYDFVGYTNNNVGMYMIRSNHEKASGGPFFRSLVRRGGSGGPDLYDIYHYNMGHTDVMRFGLQGPSVLHFTDNGAAPNANIFARKANWDWFDNLGIDGWVPASKRGAVSGVGLANMKNGQQYVVGLKSNTAQYWTTTGANGAWKIEKVLPGTYTLNVYKSELEVHTTTVTVTAGSTSIKNTITCSDPQDTVVVWRIGEWDGSPKGFLNFGDTPMKPT…
KZM28566.1	>ST47_g292	MRVQATITALTSVASGFLMPRQSKETTKTPNVVAAQYDGTCFYPVPDSKFNLEAYLGTWYQVAGTPFGPTAQDSCVAGNYKLNDNGTIRVLNTAKRGAQTVSIVGTATPVDTAYGAGGAFIVRFPGSRDAKCPGPNYIVQDYAADWAIVQTQGWGTLYILSRERQPPPATIDALIDRAVAYGSNASAIFKFNQTGCDV
KZM28577.1	>ST47_g281	MKASTIFAAVAAFLPAAMACNGYTGGVPKAVGTKTNKAVIEVKAGQVFDGQWYRYDRGSGACGGQNEGNYKDAVFYLHEGATLRNVIIGKNQAEGVHCDGHCTLEYVWWEDVCEDALTIKNDKAGKETWVIGGGAYHGSDKIIQHNGCGTVNVINFYVEDYGKLYRSCGNCSKQCKRNVYIEGVTAKNGGELAGINANYKDTATLKNVCSDAKTKCQMYNGCAGGCEPSKAEAECQLHNLLRRLEAEFEDEYPNIFNGACLPKLKQPLTLALKLGGREIESFDLRGAQLIQDCASVGAKIVRKLLTSEEHECDRVEPSVQGNSPLEPVAEEIAKAEPALTAEVPASLAEKELTLWSSVRQRIIPPYVKFVGFWVDRSDMDQSHQEELESHFPEVKILSD…
KZM28594.1	>ST47_g249	MPAARLRHALVAAFTLTLLLAGCSSGAAEEPSTPTSTEATFYIVRHGQTAFNVKEIVQGWSDSPLTEKGVSQAHDTAKLLDGVDLTAALSSDLGRARATAETILGDINSKVQLETSDLLREEYCGGLEGETEANFYGPILESYGLKRDAELTDYPKYLEMTTPEQRVDDIAKSDPTQTAETWPAYKERLTAAIDLLESAAEAHGGNILVVSHSTSISHLLTLMDPNGYHGESIPNGSVTTVKFRDGAFTLEKLGQ
KZM28610.1	>ST47_g246	MKSFTLVAAAVLAAGVSAQYSAGSVSTPVPTSIPGGCNPAHPGSCPTPYSASQVSVSKPASSKPASSKASSAPPASGSITTTITAKAGCPTGPAPDVIVTRSNAPVPSCEAGKNATKPSIMSMPGYGPPAPSAGSGSGSGSGSNSGSGSGSGSGSGSGSGSGSGSGSGSGSGSGYGSSYGSSGNGTKSTSTSSSNLPEFTGAAGRNMASGALVVLAGVAAYLL
KZM28611.1	>ST47_g245	MKSVIAVAALAAVASAAPTKRATGPTDAAILNYALTLEHLEDTFYREGLANFTEADFKAAGFASDVYGRIKTISGDETTHVSFLTGALTAAGAKPVKECTYDFGVTSVQSFLATASILEGVGVSAYLGAAADIMSKTYLTAAGSILTVEARHSAYIRNVNKQSPFPQPFDAPLSYDEVYTLAAGFIKSCPSDNPALPVKAFPSLSASSKDMPIKTGSTVLLGTSGYKIEGTVYAAFIAVTGPTFVEAKAVNGGYEVVIPEGFAGQSYVVLTSCNTAATDDTILAGPAVVEISA
KZM28619.1	>ST47_g234	MLLILATLFCVSGPVTATTKPQACWRNSTCNGPSHPAFTGPWEAFNLAPKSRSVEPQTLLSLPNGAPLGNYNHNGTIIKASSDGVVFDFGLEVGGILSFEYAMNGNSTNASIGLAFTEAKDYVGRKSDNSNGGQGPDNALLYPLNTTREGSYIMPDVSLRGGFRYLTVFLLASPNESLTVRRVKLEISFQPTWPDLRAYQGYFHSSEPLLDKIWYSGAYTLQTNSVPGNTGRAKVQTDRVGWNNAAYIGPGDTVLLDGAKRDRWVWIGDMGTAVPAAFVSTGEMESTKNALRAIFDNQSADGTLPKAGPPYLSKDSDTYHLWALIGFYNYYLYTGDEIFVQNYWSKYVLGVNRMLGKIDSRGLVNVTGTADWGRWTYSSERSSASMLLPDASTHRTNWT…
KZM28622.1	>ST47_g238	MRFQSVSVIAAAIATALACGGDHSCYGPLKDDVVLTRNVRRMQPDASNATTGPKAPLEWGQINFLHTTDTHGWLEGHIKEQSYGADWGDFVSFTRHMKQKANKLGVDLLLVDTGDLHDGAGLSDATSPNGVVSNPIFENVDYDLLTIGNHELYVTEIAYETFSNFSKVYGDKYITSNVQIKNPATGQFEYIGAQYRYFTTERGLRIMAFGVLFDFTGNSNVSKVIKAADLVKEQWFLDAVNYKDPIDLFVLAGHNPVRLNESSSSFDTVFGAIRGERPDVPIQGFGGHTHIRDFTVWDNKATALESGRYCETLGWLAMSGIESTAKKVKKNPKGVPNPTRSAVPPPSTGTVSASLQLPTSTSPSSLRYARRYLDWNRQTFAYHAKGSQNFNAFGTPKGA…
KZM28624.1	>ST47_g230	MRLSPPTLALLGLIAINGHAYHPGDSNITFYGAPRASLDGVLPVLSIEEDYIRSQTDHFSNKAFGAAGELQCSASSPCVDGSCCNSQGQCGFRDEHCKDNCVANCGATAPCGQNSKEGKQKCPLNVCCSYFGFCGATDSFCRDTTDAGQSTPCQTQFGKCGSISPPSCGAGSGTALRRVAYYEGWNTRRRPCDKVFPQNMDTTGLTHLIFSFATIDPSTFGVGPMHPDDEKLYEDFFNLEDGSQKWIGIGGWEFSDTGATRYTWSQMASTKTNRAAFISSLQQFLEKWSFRGVDIDWEWPGAESRGGNPAIDMRNQIDLMIELRQALGSRGLSLVLPAQYEYLKHLDPKALEAQVDHFNVLSYDLHGPWDATVPGEGALIKPHTDLKEIDTALNLFWFN…
KZM28631.1	>ST47_g226	MPSTLVFASLLVHAAAQSTILYIPFYVLDTQSIDASIVAANPPATTMQLACPSGTDSNDCGLFPDMTLVYGPSTYHLDMGVGDGNAFTGTADCSRGANTALCTEFATGSEANFPGSSTTTYASEDILTLPETVASGAERL
KZM28632.1	>ST47_g217	MKLSTPLVLAIAASSATAHTIFLSLNNGAVGDGVRVPSYDGPITDVTSNDVVCNGGPNPTAKTNTVITVQAGSSATLTWRHTLTSGPSDVIDSSHKGPVMAYLKKVTDAKTDTGVGNGWFKIAEDAFDGTKWGVDRLIANQGKQTITIPACIAPGQYLLRGELIALHSAGSYPGAQFYMECAQINIIAGSASKTPATVSLPGAYKGSDPGITYNLYSGQKTYTAPGPAVFKC
KZM28634.1	>ST47_g222	MYASCSSLTLLSALVSITAAYPSSAYNPAPNPGIRKLSTVDIRIAPKSHDKVMISAVSNSSNTRRLSYFVQSGLAITHGDVIYSSEDELLRKVKAQKRSLSYFADDKESLWPSARIEYKWQSEDAKGQGRQEAWEEATKRWTDMLPFVKFSENPAGDAQSEDVVTLVPTENTGSCFSPIGKAQNSQSNQIMLDSECGGAGTYTHELGHTLGLFHEHMRPDRDEYVTINCANVMQSDEGPNNCGENCSGYGCNFQKLPKDRADWSGPYDSLSIMHYSPDEFANGNGPAIVAKPGVPTPRRHTFPTAQDAKRVCSLYQDQCKGVCGDGKVEPGNGEECDDGNNQSGDGCSSDCKKE
KZM28637.1	>ST47_g221	MLSSNCLAALTTLVVLTTSAPTPIAASSSGLATVDLRIIGPQSTHYSTNNQSPTSDQSQHLTVIVGQALSLEHDPLHVQGLQIAAVEAGESLSLSSTSVVDNGWRVVCTAHIVGKDDLVEFDMRDKGVLLAGGGLAKVTRLSCVVDEEA
KZM28646.1	>ST47_g180	MAPPEHYKHGLLGLLCLTPALVLGKTSKADSIHSCLQNGGVQATISTDSTWANDTAAFQFRIPREPVAVAFPQNRDEVAVALGCARDASVKVSTISRGHSFQGYSFGNPGNLVVDVAAFTELKFDNATNQLTFGGGANVGPTAKYLWDNHRRHFPHVRGSHVGLTGSSMGGGFGTTSRFLKTPVDNLVSIEYMLYNGSVVTAGPGSDLLWAAQGAGPSFGIALSTTTKTYELPRDGAISYSLNLGDVSTATASAALLAIQKWVVDGQAPDELSLRLTLSDFSSAGFFYGDEASFDKAFSPLVKSLKSIAPTFNLTKTDIPSFWDSEVAAVGPGMNQPTGGALGGRASLVQSWTTTNDHPLTLKQAKALFDNYHSLNRTDLTGTGFLDLWGGVSRDIADS…
KZM28647.1	>ST47_g181	MPSYFSLLGTLASLASPGFSQDVSSLASASSSAGSSPSASSSTSVSLSTTFSQANVPTGTPLPGNYGGEYRPQVHFSPPQGFLNDPNGMFVLDGIYHLYYQYNPTANIAGEQHWGHATSKDLFTWTNQQIALFPGSEDEGIFSGSAVVDNNNTSGMFGNQKNGVVAIYTVNTLQRQTQDIAFSYDGGYTFEKYENNPVLEPGGTNPTQFRDPKVFWYEPTNSWVMVAAYPVDFEIGIFSSPNLIDWTPTSNVSRIGLSGLQYECPNMVEIRIDNATDGQPESRWAMIISINPGAPLGGSITQYLLGDFNGTHFVPDDALTRLTDFGKDNYAGQFFYGIPADQDQISIAWASNWQYSGVVPTAGEELGDGFRSAMSVARGHYLKNLPRQGLTMVQYPIGI…
KZM28650.1	>ST47_g184	MGLRYGLIGFLLGTCVGAECRNLASAEKIKVGAPRVTLHQATVEGFVDLHNNSVFLGIPFADTTGGQNRWKAPQDVPKAKRHNIFNATHYGATCPQAISGTLFSQQGEDCLNLNIWAPSSGSNLPVFVYMYGGAMVTGSSSNPQFQGNNFARKGVVFVSFNTRESIFAYPNSAELESATESQNFGILDVEKAMDWIHENIAAFGGSPEKIVFGGHSSGSVQVDHYLWNHPQTWLAGAVQMAANAKSGPAVAPVNQALDIVAAEVGCPTGAGQLECLRKVDLYDFQTEKFNATYNTWFTPAVDNITRYQDYESRFAAGNYASHVPLLTGNSDGEGAVFGLVYGAENTDFDAWLDTFDADVAEIPKDLLLAAYNASDFNTVSEMSGAQYGDARFFCPVDYL…
KZM28651.1	>ST47_g185	MRFTSQLALSLLASTLSHALPAPRDEPSATASSVTFTSASDNITVAADQLDQLSDFAQSQVNASLSANSKTKRGGCNLFNVAVRREWGSLSSKERKSYTDAVLCLQNKQSKTPASLLPGARSRFDDWVGTHINQTTTIHYTGTFLAWHRYFTWQYEQALRNECGYQGYQPYWDWAKTAVTGLENSAVLDGSDYSMSGNGEFIPGRGNVILGGNGLPEIPIPAGTGGGCVKSGPFKDMKVNLGPVALGLTNGSTISNGDGLSYNPRCLQRDLTDYTNKRWANASSVVSLILDNKNVYDFQMVMQGVPGSGNIGVHGGGHYSMGGDPGRDLYTSPGDPLFYLHHGMIDRTWWIWQQLDRKTRFGESGISGTGTFLNSPPSANTTLDTLIDLGYAASPAVTM…
KZM28659.1	>ST47_g202	MQKASATALLLSSLSLRHVLGFGTINEPAIVGQHCEHERITRAAFACPPGAVISDGRCFEELSLHQLSGRSDIYVGQGSNGAVGAPDMLDPVPEGPEAHCDNADFLDAQLFNLGDEYPVTRQQASDQLQICISHMRGRIEEGIDAADKIVDAGARIIAPEVDISTLDCRFSFPALQMHVFARAKCSAIEGFGRALHGIQDFYAHSNWADDAEPPFGPNNPPGLKRVDSPVFLDLRGENDISEQVPHNLSTGCFGGLFTDGPVGKAGHPLEPGSIDCTGRITHHTLNKDNGLIDQITGNVSTPGPNTPRSDFPGNFQRAVSAAIQDSRRQWRHFRESIRRTYGTERGNIIICALVRDKPATDCYGRRVAILRDVVKTANRIAEMQIPIHTWLLEELADKP…
KZM28667.1	>ST47_g199	MVTSQQRSAPRWTAVFLLWTALCSLFLPAVSVKHENFKTCDQSGFCKRNRAFADDVTASSSFVSPYALDPTTLKFKDGQLDAVVLKTVGEGAEKVQLPLTVTFLESGVARVTLDEAKRQKGDIDLRHDSKARKERYNEAGKWALVGGLKTSSGAALAEAADAGYTKVVYGKGSRHQAIIRHAPFSIEFQRDGETQVKFNERGFLNLEHWRAKVEKPKEEPKDGEEAKEEPKVEEEKVEEEKGEDESTWWDESFGGNTDTKPRGPEAISLDISFPGYAHVFGIPEHATRLSLKTTRGGNDAYTEPYRLYNADVFEYEMDSPMTLYGAIPFMQAHRKGSTVGVFWLNAAETWIDVTKTRNTANPLALGVEGHTDTHTHWMSESGLLDVFVFLGPTPQDLTR…
KZM28668.1	>ST47_g198	MRLFHFSSLSLAASVLAQTSNDTRKCETSRYEHKHRVFISTDMSNEPDDQMSLVRFLTYANELDIQGIAGSTSIHKNDSVDEATIRQVISVYGNVTVNLNAHVPPSAPYPSAAELLSKVTTGHPVYGLAALKLNLSDAAAAFVDVIDSSPEPTWFLAWGGTNVLAESLQHVSSTRSANATAQFVSKLRVYAISDQDDAGPWLRLHFPQLFYIVSLHAMSDYARATWNGISGEIFRPADRGGPDSSLITNAWLDQHIRSVGELGKHYPHYDYIMEGDTPSFFPLIKNGLGDPEHPEWGSWGGRYKLLDRSGANSRVYTDATDFAAGVDGAGHLSNHASIWRWRSGYQFDFANRMQWTLDTDYSAHNHAPLAVLADEACGGIVHRTFTLNDTISLDASASW…
KZM28676.1	>ST47_g190	MLFCQFVKLAAFASLAKAVELTGYEYVVVGSGAGGGPLAARLALAGHKTLLIEAGDDQGANQNYTVPSFNAKVSEDPNLAWNFFVKHYADEERQARDFKTSYTTPDGGEYTGLSPPSGSVQKGTLYPRTGTLGGCTAHNALIAVYPHQSDFENIASITGDSSWSPDAMRKYFVKLEKNAYLTSGNGHGYKGWLGTQYAPIDIVTSDPQLLSLVGGAAFALGNATDVIVNLATLLAGDANANTDARDSEPGLFQIPLSTADGKRTGSREFVVAVRDAKHANGTKMYPLDVRLHSHVTKVTFDETVTPPRATGVEFLDGQYLYKASPKNTGAKGTAGSATASREVIVAGGTYNSPQLLKLSGVGPADELKKHSIPVVVDLPGVGTNLQDHYEISVQGEVKN…
KZM28677.1	>ST47_g178	MRLLVAVVFALLLVFAAGRVVPALPRPYSVTNITTLVKVFGTPLAADNTLKYSANPVPASLSFLDEPVVAAEPTPQLEWQKYVCRGEKLSQACKLDKEKAMQFVEPIDSIWDSTMEAELKLWGYKELLADSHCCFDFLSQHKRQLGGNKHIHQASVFASEWEVSQPSMIFHVKDAPPLTKANQKGLDLPKRSKGLAGRDLAPAANILPLSSYNDEPALGGDSPPPPKRPKLGPGSPEDPSLPASPRASPKDGWATYVCRGEKLTKASKLDADKGKEFVSPIDSPWSGALKAERKLWGYTDMPYADCDFEGEYYNVRRAYKALKVLPESENESEHEDSNDCFRIFHYDPEKTDDQGHDIELKDQTYKVNDKVYRATGAHGTFGINVNEGIVWFIDRASAP…
KZM28682.1	>ST47_g171	MKFSLTTILLASGLAVAAPVADPEPLFSRQAAQSINDAMVRKGKKYFGTATDPGRFNSGSNGAIIKANFGQVTPENSMKWDATESSRNNFNFGTADQTVNFATSNNKLIRGHTTVWHSQLPSWVSSINDKATLTSVMQNHITTLMGRYKGKVYAWDVINEMFNEDGSFRSSVFYNVLGQDFVRIAFEAARKADPAAKLYINDYNLDSASYAKTLAMIRNVKAWRSAGIPIDGIGSQGHLTSGQGANAPAAMAALCAAAPECALTEVDIQNAQTADWTNVVKACLSQSNCVGITVWGVRDSDSWRPSGNPLLFDANYKPKAAYDTVLAALQ
KZM28685.1	>ST47_g153	MKKTFTKSLTWAAALLPAALAQNATISLAPAATGFDSDNAALIYASSPILLANDGSAADGGFRTFAASNSTNSTSIAERSHERSGRTKIAVPIYDVGGRDVIFNIPSPNSIIRAYDVVSGSEIGGSRKYQLGDWSVARNWRSHTSGANYVFLFGKKAVVQFLVKGGGNEVQILEVQTFAIPIEGETATVLPNGQIFFSGGEGETLYSFQASESIEAPDIRTVGEDLKIQGLGAYHSNSTDYLLVAHDDVIDLYDASFSPKGSVSLEGISELSIGGDISVLQAASTDYPFGAIALAFEGEDDTGVAIGSLSSVLTSLGIQANTDFDPHTKSCGYCTSPISDACSNSGFSQGNSTCGCFAGFAGADCSQTTCQNDCSGHGSCDGPNVCKCEVGWAGPDCSF…
KZM28686.1	>ST47_g152	MPSVLAMKVIVAFFASGTSAWVIGTQQTETHPKLTWQRCTGKGGTSCSNVNGEITIDANWRWLHDKSANSYTNCYDGNEWNKSLCPTNSACTTNCAIEGSDYSGTYGITTSGNALNLKFITKGQYSTNIGSRTYLMRDTNTYEMFKLIGNEFSFDVDMSQLPCGLNGALYFVSMPEKGQGTPGAKYGTGYCDAQCARDLKYINGQANAEGWQPSDNDQNAGVGKKGACCAEMDVWEANSISTALTPHSCQPEGYSVCEDATCGGTYSLDRYAGSCDANGCDFNPYRVGAKNFYGKGKTVDTSKKMTVVTQFVGSGSTLSELKRFYVQGGKVIPQPQPTIPGMTGNSITQKWCDTQQKVFKEDVYPFNKFGGMASMGKAMAEGMTLVMSLWDDHYANMLW…
KZM28694.1	>ST47_g179	MKPRAVFSLIALAAFTAGRVIQGPFRSATVTSLLPTLQLRNLQVNKTDIAASIAADHDSNPEDTWSSDPDDEEDEHPLTLTPEQQEAIWCKARSRGVKMIKAMMMNDGEAQTMLGWPYIQSPWDGDLKPELEKWGYLDDDEKHEEVDDQCDFDKTHEMADAFKDLNVDPRSAGSGGPNHCFYVEHMNGPAVTRDEDGELPFEEDQHYLVDGKDYQVTQAYAKIGVNPTNGLVYFIHRESPESAAEEHWKRKPAANELPALRASSDIAWGMWNRVASADLRNLNYFMAVQVINPETQYIMQRALEQHNVAVVPAWPGKDFEFAVPNGREHEMEAALALLGSSNGLGAGYFIIQHRPQLGWKYIWKVKIFMAGQGEWALPNVLFYVSDHATLEGEGPQRLL…
KZM28696.1	>ST47_g165	MFSKVTALLALAASASAHMILEYPVPYGNNTINSSPLAPGDYPCKQRSGVYEVTEMNQWNAGETKTISFIGSAVHGGGSCQFSMTTDTEPTESSQWKVIHSVVGGCPSNVTGNLEENPAGHGAATFPVTMPESMPDGRYTFAWTWLNKLGNREFYMNCAPVQVGEAGATASAANAASALGALPDMFVANLPDTQCATTQGEDFNYPEPGSSLVDGNSANLGDSLSGAGCASMTKLGAGSGKLGSPTGGAASSAPAATQPAASSAVASAPAASAPAASSAPGYSAAPVASASPVVSAPGVFAPGASSAPAATSAAPATSAAPVASAAPVASAAPVASAAPSTPSTGEDCTPCTNDGAVVCIGTSSFGLCNRGCAVAQQLAAGMACTNGGISAAVTKRSSP…
KZM28725.1	>ST47_g132	MLLSVFSIFSIFPVFVLTASTAATGANMTDSLPRRIDVHSHFLPPSYRDALAQNGHSHPDGMPAIPEWSIDRHLEMMKTANVSKSILSLSSPGTHLAPGNDTLGRDLARECNAYAAHVKKHDPERFGYWASLPLPHVDAALREMDLAWEEGADGFGLMTNYHGLYLGDPALDSVFDKINQLAATVFIHPTKPCTRQGAGANAQTLDATPFGEQYPVPIFEFFFDTARAVINLFGSGTVDRCPNVTFIVPHAGGALPPLMTRFIQFSSVVPGGRVLDARKVREQLDKQFYFDLAGFVFDGQSGAQGQLKALIDGFDISHEKLLYGSDFPFTQTEFVESFARRMKDGLEHLFDPGQRIAIYEENARKLLGKEDEK
KZM28727.1	>ST47_g134	MKLLSLLSSLAFASSAAASPLEISKRQSTAWRYSCDTRAAPADFKAFDLGGCTAQLSFTKDRYVAIQWAFEATYADGSRAEHKPFRDFNNFGVSDTFYPYLGNNFLTRLPGSSAFTAVHEFTNVCKSGQAPVSWRFYTTSANSACSPADYRYTTGQIRTVGGVSRPAKVSGVTLRRANTAGDFQVGWSAVAGAAAYSVIVQYPTGTDEVGDAYTNVRGARVQGTSTMVATTTRRQDVQRKCIVHAVNAQGVWSFTNDVQPIAASW
KZM28728.1	>ST47_g137	MKLSFVVMSVLGAGVLAAPVAEGKEQSDVRKIASWTDKKAKVSNANVAARDSTTVPKEGYRRAEGEALGFIIPKRKAVAGDSTTVPKEGYRRAEGEALGFIIPKREPATEAEVKRSDCGPNPHANC
KZM28738.1	>ST47_g119	MKWAIAQTLAFAAGIHAHGYLSQPMSRTGLNAQAGADTCPECTILEPVTAWPDLDAAQVGRSGPCGYNARVSVDYNQPGPRWGSAPVINYKGGDVVDVQWCVDNNGDHGGMFSYRICQDQALVDKFLTPGYLPTDAEKQAAENCFQAGTLPCTDVSGQTCGYSPDCTQGQGCWRNDWFTCKGFQDTKCRGVDNAPLNSCYTSIAGGYTVSSRIKIPNYVSNHTLLSFKWNSFQTPQVYLTCADIKITGSSGSNPPTTSSKVSSVAPTPTKASSTATATGCATPVATVAVTFNSKTTTVVGQTVKIAGSIAQLGSWNTANAPSLSASKYTSANPLWTTTINLPAGTSFEYKFIKVESNGAVTYESGTNRAYTVPNSCASTATVDATWK
KZM28739.1	>ST47_g118	MMFFKAIVAFLLQVTSFVAAADTAAWKTRSIYFVLTDRIARSSSDTGGGPCSNLGKYCGGTFKGLESKLDYIKGLGFDAIWITPVVANSADGYHGYWAQDLYAINSNYGTAADLKSLVSTAHAKGIYVMVDVVANHMGFANVADNRPAPLNQASSYHSVCNIDYSNQSSVENCRIANLPDINTQSSEIRTLLNTWVSWLVKEYSFDGVRIDTVKHVEKDFWPGFSSAIGAYSVGEVFDGDPAYLAGYANLMPGLLNYAVYYPMNNFYQQKGSSQALVDMINTVSTFPDPAALASFLDNHDNPRWLNQKNDQTLLKNALAFVILARGIPILYYGTEQGYAGGADPANREDLWRSSFNTNTNLYQSIAKLTAARKAAGGLAGNDHTHLYVAETAYAWSRAG…
KZM28742.1	>ST47_g122	MVGPAVAAAVAAAVAAAGAYASLDTPTALPRHSDSAPRNYIYIYIYTYTYIYIYTYTYIYIYTYTYTYNYTSTSTSTYTYTSTSTSTSTYT
KZM28746.1	>ST47_g125	MFFSTLSIAAILAALPSTLALPNVTAKALPADCSSYPLYNEETGNAGPWILNLANSDNADIEGWGDSSVYSYSYSPATGPVMRWGYMTIVSNNQFAKTALQCQSSRLHAWTDTALTRAGAPTNVAWTPLSLSQYPYDASLLYLIDGDAPTLYEHYVGDVKQDGYFLGGYNTTTWGVQWQEATGPGSYNQPFFYMRLLPEGQSLKANETKSFVKIAY
KZM28752.1	>ST47_g103	MMHLLAIIVAIQGVASASITENLGLLQQHPDTSSAYRPVKTQDRVHSPPDPEEIEVVELPLPPVAPNRECGSCSVDINPRRTGCIARDLTNQKFQSGDFTPDGKHVVVNAEFVGAPAAPEAASIYDGEQVMLIKADGSSFSNGDPWKCLSCGVPAGNAQSLDSKKDYPHVFRSGTKAIWGHNILDCDGEQLSSESCTPDRIHIYPIHWPGTNSTPRELRVHPDDSHIGWSSFTAGGQFAYFGRLAFNAAPTDNGPSAPRYDLVDVNLLVDPTRATPLSANGTQLTIDDDAITVGELRGFSGSGNEITYIGYPTESTNIDLYAVHVETGVVRRLTSHPEYADPMAFSADDEWFVTMDTRGSERQMWMAGLRGVPPLVDLVAVMAAASTRNNGVRRFFQPI…
KZM28753.1	>ST47_g104	MLLKSQALFLLSSPVLSANSYPTVSNCVASALSTPSVYGASVLTIDAVESTLESTSISFCNVTLTYTHPGQDDLIKVWLGLPSAWNGRFQGVGGGGWATGSPSEMVPAISRGYAAVSTDGGHDALGQTADYWALLSPGNVNLYALQNFASVALNDMTVLGKQLTEAYYGKPISKSYWSGCSTGGRQGLMMAQRYPDAYDGILAQAPAVNWAEFIPVMFWPQFIMHKLGYFPNQCELDSITAAAISACDELDGFKDGIVGLTGSCDFDPSTVVGQQYTCGNITGSISFEAAKIARATWTGATDGKGNVQWPGIALGAPLSAIAGTTCDRDGRNCTGSPFLISADWHRLFIQKDPAFDLYNYTQAAWDAAFHASVQQYTSIIGTSDPDLSEFKNAGGKMIT…
KZM28763.1	>ST47_g97	MYSKSLAATFLVLAPLALAQSGMISKPSATATVSDTEVVTMMWNSEAAATAAVTATVPSMESGMSGMSMDASMTMSNGKGMSGMSGMSGMSGMSMTTATGRAMAGMNMTGSAGRTEVMPGAMGAGWVVISLGAGIGFLAGML
KZM28771.1	>ST47_g58	MHILGPLSIVAALATYVMAQSSPQPPEMTLLYHMEVQLGERFSLGPVPNGQERIVIPIVGGTFKGPRLSVFIDCHHCKDVQADELQGKVLNLGADWRLTDKDGKIRPDARYNIQTDDGAWIYVQTEGPTQSDGRTLLRGKFETATNGTYNWLNDVVAVGVLTRNGTEGVIIDMWEANAP
KZM28772.1	>ST47_g57	MRLDNNLLSLAFLPALGLTLDYNPSPTVTIDAGVLLGKATALPNGLGPSVNQFLGVPFAQSPPERFSPPRNVTAFSQRLNATEWKPACIQQFRYPQVSSQFTQSVFNNPPPVESEDCLYLNVYAPSGSPGGNGRAVMFWIYGGSLQFGNAGQQNYDGSAFAAYEDVIVVTTNYRTNVFGFPASPELPATGKNLDFLDQRFALDWVQRNIHAFGGDPTKVTIFGESAGAFSVDALLTSYPKNSKPPFRAAILQSGQYSYRPAPQTSSISAWNNLTASLKCPGTYGSNLTCVRAANATEVKRVVEMNSLVFSPVADNVTLVQNPAARRLSGNISHIPVLGGSNSQEGRVFAVGQTNLSAFLQTSFSAAPALIPAIAAAYSIGSPGITNGYDAISAVITDLT…
KZM28775.1	>ST47_g54	MAASLLLTVALVAPTLAKTVRSPTPPMGWNSYNSYNCFPSEDKIKHSTDGLIALGLDKLGYNFITVDCGWPSRDRTSDGKLQWNETLFPSGGKALGDYIHDLGLDFGLYSGAGYLQCGSTDLPASLGYEQLDAESFAEWGGDSLKYDNCYSTSNTTMVDSSSAESQSPARFQHMAAELDAVDRDIHYYVCQWGIGVDTGEWASKIGNSWRISNDIYNAWRSIWRITNQVVPYYRHTTVGAFADMDMLIVGLNALSEEEERFHFGMWAINKSPLIIGAAVDPEKLNQHSLDIMSNKEVIAINQDPLAKQTQLVRRYTVEEYDIWLGELSGSRQIVGVANWRNSSQSIEIDIASLGIESAQARDVWAAKDLGRVEGVQKLDLAGHELRLWILSNTTTAAPL…
KZM28788.1	>ST47_g79	MYSYLPTLLMVGTLGSLVAADNIYTYVKPGCAGSAFFFKDIDHNVCALSITSNSTTSIADAIAKNVTLVHSSKLEVQETGKKQFIGWDQGPDSNSDGLLQCGHIIVNKAVKDRETCIDGTLHGVSWTEPGDDKRKRDAFTCSGSTEPDAVFLNGKHYTTNGIPEEDAGRLKELVFTDGNDVPNDLLKYEFTPNV
KZM28792.1	>ST47_g82	MRSTTASALALLSILSTSAALPTTDLTSRQAAACFVIGNTALPAEIADTVTSIQSAVTCDNSATTISNVPDVSSGSSKFSAIDFSKSSQTPLEFALSKFATAEPLADTDLQTFQNNLNVYLATEAGIRSVGGSLAIKVPKFFLQMQVSRIQTAQGNPPAAAGQQVDHLRDKVTKNAAGESKALLDQVTSLAAQVQ
KZM28803.1	>ST47_g64	MRLNLFSAALLGQCLVAAQDLANVTWPNSFPKQIAAVRRREGLTTSEFQYHHIFVHGRKAWNAPDTVDQPLAYVQDHVFDSAYGINTTKNSINPSYFGHSDMTELYSRSQDAFATPPPNNYTSTIIGPDGAAFSDFSASVNMYAHEVFYPVNSSCQHPIQASAPNAFYWIFANASNANTSSFENATFAGSIMDSLVSAFPPGAIYNASIHTSVAGMDSRGYYGGYNNPTLNAVLKFWLCDDHQAITAFRKAQSGLISQNEKLQINLDNSFVIFTRPILIYDRTTNTPFDTARAQKALLTNGFSSNAIVAPLNLT
KZM28809.1	>ST47_g24	MLTKSLPLSLALQVSLATAIGNAIVSNRCPYDIWLWSVDQGHSSPPIHIPARTKYSEPLRSACSGCGASLKISKTDHLVAGQQTQFEYSIVGGNVWYDISFVDCARGESAGNCPGHDKGLAIDSPEQACGKVHCAAGSYCPTQSYYVDLPKQKLGLEDPVFGCMGKGSDIDLYIKVCSDETPLKRSLAGRILLNDYA
KZM28810.1	>ST47_g25	MRATTAILALVGTALAAPNWQRPQPNKEVENVHIVYETVLYTVYQTEGQDQPKPTKASTPVPQPPVVTTIVYEENTPTPTPTSPVVVYETKPPAPPSTKAAATPAAPAPAAPTPAAPAPAAPASGYQAIVDTWRAKMGLKPLTNDDKLQSNAKDCVVSSNGQMVHKLNPGSYGQVLAPGNADDFEHVFVGGWLCEIPTLPGLDGICSTQSDGWAYEGQTGHAEILTSDNYSKIGCALYAGIWACDLA
KZM28821.1	>ST47_g46	MRLYGSAIALLAATSAAEPIPRAVQAPTVDLGYAVYEGSFDGNNTINAFKGIRYAAPPVGKLRFAAPQAPDKNRTSIIPATSDPPFCPQTGASSKTPAAYGFTSALGNEDCLFLNVYAPANAKNLPVFFWIHGGGYGLFSATGLDPTEFMKQNDNGFISVIIQYRLGAFGFLSSEDVKKGGALNAGLLDMNFALQWVQQYAKKFGGDPTRVTIAGESAGGAAVLYQSMAYGGKQKDNLFHNVITASPWIPFQHKYNDDQPTKAYNDFVTAAGCSESTEKLLCLRSADTVIVQNASALVSEAGPFGTFAFLPVTDGSFVKQLPSQQLAARAVKGVRVLSGNMANEGVPLSPLTTRTLQDFRNYIGTTFPDFTQSEKTAIEKQYSYVGDTEDVNPAAPLFA…
KZM28828.1	>ST47_g7	MRTPFFLASLGLLASAADPQPSGAPGGTSFDCGTGTQSADQSFLDTIQQLHNGKAKGSLAARAAELAARDDPIKIEAVFHIVMTDAAKDSITNAMPQAQLDAMNAAYNPYNINFELQNVTWNTNDAWAVGKKDDDTDMKKQLRQGTYNTLNLYFQTDLSGGVLGRCTLPSAIGNGKGDPTVYAGDGCNINANTMPDGLMDGFNKGKTAVHETGHWLGLLHTFEGYSCDGPGDYIDDTPVESTATDGCPIDPKKQSCPTQQKPGESDPIHNYMDYSIDDCYEGFTDLQVQRMKSMWSMFRDGN
KZM28830.1	>ST47_g5	MRFTPSVVASAALLSTANAAIKGFNYGAQFNNDAAKTLVDFQYEFNAAKNLPGTDGWTSARLYTMIQHGTQNTVIEAIQAAINTKTSLLLGLWASAGQESFNNEIVALKAAIAQYGTAFTDLVEGISIGSEDLYRISADGAGGNPGAQPDVLVNYIKQTRDAIAGTSLSGAKLGHVDTWQVYVNASNSAVIDNLDWIGMDAYPYFQSTFANSIGASSDLFFEAYNQTTAAAKGKPVWVTETGWPVTGETVNQAVPSPDNARIYWEDVTCKLVNENVNLYYYILQDVQYGNPSPSFGIKPAGDLEQVSPLFDLSCPAAAKNVSSLPVILMSSALSPILFTLLTNLSFLAFVLFYFLPVAQPRCKCPRTQHFPVHPQAWAVKPSVWIARADANAKSSLSTI…
KZM28848.1	>ST47_g31	MRVVAALLCVVSQQAWMVNANVEKTIFLGPSAVTLPDIRPSLEDLRLHSLSNLEPILPTQLPVQFPSHTNPHGIESWYLLSGLEEGRRYEVRICWPATSPTDFWLDTYSIAQVFDTPNLISSLASYSEQLAEPHLKSSLDTQRTLKEAQSILFLRVQAAASYYSTNRSLMERPPLVDVDIILDPFLLNVLPRSLVPVAIYITAVAVAAWFISGYLYRWLLSVVEEPREKPHAD

## Sheet: ArD2 secreted fasta
>ST47_g10596
MFQLLRALALIVVVTPAATHATSEGDPALANIPSDVGPGATAPVRPFRLEQVRLGKGLMQEKRDRVKNFVRTYDERRFLVLFNQVAGRANSSSLDPPGGWEDGGLLSGHWTGHYMSALSQAYVDQGETIFKSKLDWIVAELAACQEAYTANQRTTHPGYLGALPEDTVLRFGPPRFAVYGSNLTTNTWAPWYTQHKIIRGLLDAYYNTNNTQALQVVLKMADWAHLALTIGDKNQPGYQGNLTRSDLNYMWDTYIAGEFGGANEVFSEIYGLTGDEKHLETAKAFDNRESLFGAAVADQDILVVTPQNKPGRRRAERLHANTHVPQFLGYLRVYEYGGAGEYLTAAKSFFSWIVPHREFASGGMGGNYPGAKPNPELFQNRDNIANAIADDGAETCTTY…
>ST47_g10579
MMLPRCTTWLALLLAVTNTVAQTTTSCNPTEKTCPDDTALSSSTYTHDFTTSGADDNAWNVTAGKVTYTSSGAEFTINKPGDAPTIQSKWYIFFGRVSFFVKAASGTGIVSSAILESDDLDEIDWEWLGGTNYASTCQSNYFGKGNSSSYDRAAWAAVTSTQTTTHNYTISWTSSATTWYIDQVAVRTLAYADAVSGTNYPQTPMNIRIGIWAGGDSANDPGTIEWAGGETNYGDGPYTMYLEKIEVVNENPGASYSYGDRTGDYTSIQVSDAEDADAASVSSSSSASTSASGSAQSSSATASSSASGTSAASTTPAVSTTSAASTTGSLTGTVRTTPSASLSALAQAAASPAVRVGADIWRLVHTIPSGASLARFLQKYNYQDPLDNTKLDNYADMTG…
>ST47_g10582
MKLTALAAAFIVQYASAHYFFDTLIIDGAESKPLEYVRENTRAAKYNPTKWKNIRNDMTPDMTVPVQQGRFRIYEESECNPSGDFGKNPWCTWDKNQIEFPVPTGTPDGEYLIRSKHIGVHGAHNS
>ST47_g10580
MQFKVIAASLLASAGLSMAAPLQAREETCPVVEQGDYVWKIDNFSARKLDGKTISSLSFNVKATNGGTLDFDCTSSDPVEDGKFYECGENSFIYFAYQADRSGLLLRQDVSDDIQYVATTTLPDYCHAGGSGPNDYICQGVSPAYITLVQYPGKLQ
>ST47_g10544
MYASMIFSAVLAASFASAAPAGKRGSGLSPDGNYFPLANGFPNPNREGEITIQDGAHGTLPNGPPPPALSAEGVTNLKLIALNELFEVAFFTELIYNVTNKVSGYDLGMGHDYMLDSLNAIVNQEELHVLNANGALEHFNQEKIQPCKYNFPVQDFQSAIALAGTFTDIVLGTLQDVNQIFAKNQDDGLVRAVTSVVGNEAEQEGFFRLMQKKRPSSQPFVTTATRDFAFTAIQDFAIEGSCPNIATIPLKRFKPLKVETKTIPAENQNLKFSFDMKDVGMYDTNDMRLAYLNGQNQPIVKNFENIKMEGEKVFFEAPFPYDDFLMNGLTIAAVTMGADEFADADKMAEAAVFGPGLIEID
>ST47_g10534
MKVSQTWTALLSTALVAIAAPIAENCTLEADYDVIVVGSGPAGIIVADRMSEAGKKTLLLEQGGPSYYVTGGRERPDWLNGTELSRVDVPGLYKSIFSVTGNLTCASDVVNAFQGCTVGGNTAINAGLFFQPPASDWDLYFPTGWKNSDMQSAIAKVHAKQPSTDNPSADGKRYLQSGYHVAKEWLVEGAGYADVGLNDGWENHQKTKVFGHPIYNYEGGQRSGPAKTYLQSALQRPNFHFQTGTKVIRVIRDGQTATGVEIQIKGSNATSIVNMAKSGRVVLSGGALLSPQLLMWSGIGEAATLGNLSASGQLTLPASQWINNSAVGDKVFDNPNTFIELFSDSISSYNYNYTDPIPADRELYLKSRSGPYSFGSQTSAFWDFIKQGNETIGCQGTID…
>ST47_g10526
MYLRTSAVSAALWLAVSATPTYGSSTNTTIEFKHWPANASRALSNMIVQNANQSNYAVFDMDNTSYRYDLEESLLPFLENRGILTRENLDPTLKLIDFKDTANFTETLYSYYLRLCEDDDFVCYPWAAQVWSGFTLRELKGYVDELMALNTTIPTQYWDGDEVVNSTVNSPQVFRGQAELYNALMDNGIAVYVISAAHEELVRMVASDPKYGYNVPPQNVIGVTTMLVNSTSGFLTNARKQIVEGNYDPEANLDLVLGPYLWTPATWFAGKWAAILTYIDQWKRPVLAAGDTPGSDSYMLFHGVDTAKGGIHLWINRRDAYWEEMQGEIRNNTAAQIANGREVTADKNWVVVKPADIL
>ST47_g10513
MLSRRFLSLAAWLVAFAAAQSCVTDNDCSLNGLCLPSTKTNATSTCRCDPGWFGDDCGRLDLAPAARYTGFNETNATAPNHYSNRGNSSWGGQIVQDRDDPKLFHLIYDQFAYGCGLSGWRPTSFIARAESTSGPQGPYIWRQNITSSFRHNAYVYWSPADRKYLLWSIGVNIPDPKQCGGINKAQWPNNISVSSAPTIRGPWAPFKILINGTNPAPAPLWSPNHPTGETILAAEDLSIFTAPSYDGPYKQVFSAPWNTSNYSPTWAEDPFLWRDKRGHWHALAHWMIDITERGVKYPRVGTHMYSRNLTGPWTFKLQEAFNSTVNFTDGSVETFNRRERPKLFFSDDGEVTPLYMVNGVQRLGSSTESYTLVQPVGNKWRELEAGLGFS
>ST47_g10490
MVKSGLIAAFAAYAHVTQAACPFMDNDARDVPASHPQVKRADGSYDVPSNTNEFMSRFEVNDTGVYMTSNSGTPIEDQESLSAGERGPTLLEDFIFREKIMHFDHERVPERAVHARGAGAHGVFTSYGDWSNITGASFLSTPDKETPVFIRFSTVAGSRGSADTVRDVHGFAVRFYTDEGNFDVVGNNIPVFFIQDAIKFPDLIHAVKPRPDNEIPQAATAHDSAWDFFSQQPSSLHTLFWAMSGHGTIRSFRHTDGWGVHTFRFVTDEGKTKLVKFRFRTLQGKASLLWEEAQVTAGMNADFNRQDLFDSIENGLFPEWVFEAQIMEEDDQLRWGFDLLDPTKIVPEDIVPFTPLGKLTLNRNPRNYFAETEQIMYQVGHVVRGIDFTEDPLLQGRLF…
>ST47_g10531
MRLHAALSLAACLAPVSAIFEDDAYHIDFHYALLGLPKRDATFFQKPYGGSKASLLYSISENQTIGAINPKDGALVWRQHPASEPRSKGHLRAADEQDTIVSAAGNRVTAWSSSDGRLVWETNVDGAVVEDLEILEQEDGITKDEAKDAIVLVSGTSHGVKRLDGKTGRVKWTYEDTSSDMPFQVSTSPTTIYYISLHPSIIGAGSKLKVTSLSPITGKKLDQYTLSSDTEITSRDHIVFAGANTAAPILAWTDKTNKVLKVNIIGTKAVTSFNTPGNYAIEKVVLHAPGHVNSQAHFLVEYQTAFGHSAEVYHVDLKKNTVSKAYSLPELQVRGTFATSTSDANVHFVRITEDEVSVVSSTSHGILGRWPTAGSPALAGGYPVHAVSEVVVKSGAATA…
>ST47_g10439
MRSTIPITTLALFMSTFSSAAPTEAKLEPVHFPRSNLTTKVLSADTMTCPNSGSSCGVVTFASGLYVSFGPGVCMQLGKNIESIYVAHCYCSLWSSCTGNSKKDVYVGGMMMCEKPKTLDEFGQEVRFISCGGLY
>ST47_g10428
MRCRTFHLFGGLALTIAAVQQPLVESQAGIFHGRYLPEFQQDLYLGIKYAPKPERFAPAALSNDTPKTHFNVTRYGLDCIGYGSDTTRLVKEGWTELGEDCLHLNIIVPKTKQKNLPVLLWIYGGGWQQGATSDPRYNMSYVVEQSVLNHKPLIGISINYRLAAFGFVSSAEITTEGAQNLGLRDQRLAMQWVNKHISSFGGNPEKVTIWGESAGAYSVGDHINAYEGDNGGLFWAAILESGGAVGPPLNGTDWYESMYKNLTASVGCANSTNTLQCLRQVPYEKIAPYGYVGLEWFHVIDGTFIPRYSRESLLLGKFAKVPLILGTNTDEGFGVNGVNTDAQAIEQLLTSKRWNLDEEQARRILELYPNDPSLGEPYGWGNRTWPENGLQYKRYQSIA…
>ST47_g10435
MRPSILIGLAAGFASQAYAACSSALTIDDFSKWSSNTNSLGQWTSDDASMTSISAANGVLSFKPKSGSYFYETFDCQAAISNNYNSIQFTTKGVSGGSGTLEIQTKSACSASAYTSYYTQFTGLTGNSQTITIPLSQFSGANGNAIVGFVWSGFSSTTATWQLSNVQFGCGGAVGGSSSSARSSAISSTARPTTVSAVSVTRTTLATSTAPTGTCAASLIDDWTSQSRLTFMFYNALNKASSSDGTMTSLTVGKPSKNRVEIVPKDTSSYFYSQFGCFNAKTKGHTGISLRIKAPAGTTFSVELDSSSSCDPTAAQAYTQTSTQLGWTFDGTEKLYTIPFSKFTGLNTEKLTTILFSAFTKTVSFGPMAFYCGATGEYIVSTTTPNTAPPATVAAPAGT…
>ST47_g10432
MYTQSFFSVLLAAPLALAAPSSYPHFSGRAPSDNVKCPVVFDGRVSTNISKTPTYFDTSNALFNPDYVKGNNLTWSQILKFPKDVSRFDGADHTAVEVTISDQSIFQKQNGFRRAGLQFTSDSPDGPGGKGIKTLHFSVKQDPTRPLNLTHEYLNVWHEAADYSNNQFQFQAGTLIDNAASKKQNFKILDRAGKQIWTIPIDFKRWQNFAINLDYTKNQTTIYYSVGASKLARVAGPSSINLVGGGQFQLGILKKPTGTSDVANAGYQSPQLNEGQIYGGVFLEDSADGCVSL
>ST47_g10408
MKFLSTAFSAMFLFELALAQVSGQATCYFANGTATPKTPDYLQYQACSGSAICCGLNRSNPSNGDPAKGFTKDECLPNGLCQNRVTENGVGKVSYWVDFCTNSDVSGGGCLDVCHETKNAFGNTALTPCDGTATSDRWCCGGKTDCCTSNVGVVQLAQVLGGSLSSIVSASRSSTIPSSAESFRAAATESSTSPASADASSTPSSTGAASGPNSSSSSSSGSGSKLSGGAIAGIVIGALAGVALLAAAIFFARRAAMWKKKASATPETGVVPPYTQHTNGYGSAGAYDTPTSDKYAHANQGEMYGSGLPHELPGGAMDSELPAQDSPKK
>ST47_g10397
MAILTSVTTLLLAAPVLAATSSVSSLSGGEKVACAKFKLKYPEQTYFPGSAGYTYETQSVYWSATNNNGPACVFAPQNAQQVSLAVTTVTLTLSKFAVRGGGHMPIPGYNGINNSGILLSPSNLTTLALSSDKSTVSVGPGNRWGDVYSYLAPSNLAAVGGRIGHVGVPGLLLGGGISFYSSQHGFASDNVVKYECVLSSGVIVEATATNAYSDLFWALRGGGNSFCIVTRFDLKTVPSSKVHIGIAQYDQSQSKGYLDGVYNFGKFGASADSKAAIIPTILTFPSINLTAYAAAKFYDSLTDSPTAFENFTAPQLPPVADSYTLQPLAEYIAATDALQPNGLRQAFRTLSSVVNREAVQDVHDMFLSGASKMAGIAGLQASITFQPVTKSFLEESVKN…
>ST47_g10392
MFVSRSFSLTAFAALLSLAVSDVFDPDSVCYSYGVDFVDEGSYFINSLSSDPFTSVSTFKGCNTGVADILLVDPDDTEYLCDDIPTTPADEPQLSKCPILKNQMSSGHWLLLILGNNGDYPAQPFAWQRDLYLTLGTQITSTFTPTVTLSTVTTPIATEILSTTSLLVTEVGPFETVTVPSATAKKTKTITPKPVTTTSTKTMTKTRLDATRVFSTTTKTATATCTTPGRPGKPDKPCRFTPTLLHPAALATPTSLPKYSRHVRRSDRAIDYEWARARVEAAKQKRNAKAQGLERRAPDTPTTTLTAETPIATTTTITADPITTTETVLFTQTSTSTLPPATVFSGVLTHTTTLPTRTKTRLQLGWATTTKTITWGATFTKYTTVTPTASVSACKKAGG…
>ST47_g10393
MLFRSLAYWLSAGSLAYASAIPTSLVERQDGACTNTARTRNCWSDGYSIATDFDAKSPPDGTTVTYNLEISNVTKPHLDGSAGSRQFQLINGQYPGPTIRAKWGDTIVVNVKNNMQDNGTGIHWHGIRQLNSCQQDGVPGVTECPIAPGKTRQYKFRATQFGTTWYHSHWSAQYGDGVLGTMIIDGPATANYDEDLGVLPLTDYYYTPAFTLNEVAQHSTRGPPAPNNILVNGTHVNASGGGKYAKMTVTKGKKYRIRIINTSVDSTFSVSLDGHPFTVMTADFVPIKSYITTQVTLAIGQRYDVMINANQTVDNYWFRVAVGTDCGSNSMIASGVQMGAIVSYSGASSGNPTSTGVAMRTACVDEKTSDLVPFVPNTVPSSVVGSAGKLEIGFSQAAP…
>ST47_g10402
MHFRPAARAAAVLAIAALFEAAPTTVQASSNAGSPSFDVYPPSGTVVNSSLFPPESVVGFPGPTPTGVEPNAIQTAPSYPYNDNKASSFPLIVPQPHGNDAESKFDISRYWGNLSPWYSLRSADYGLPDANPLIPEGCDITQVLLLYRHGARYPTSGAAPATFAQKLVNATKAGGVAFSGELSFLGDWTYKLGAELLTPFGRSQDFLLGVEYRQLYGHLLNNFTAAGTLPVFRTQSQDRMVKTAENFAAGFFGVPEYMSEVNIEIMVETPSVNNSGAPYEVCLNSNVASKGSIGSTVAAKYAANAFNATIARLQSQAKGINFTATDAIAMLQLCSYETPALGYSAFCDLFSEEDFLNYEYYYDLSFYYNNGPGSPVAAAQGKGYLDEYIARFTGKYPSA…
>ST47_g10425
MKASVAASILALATSASASPSYKAPNNFFSLNKRAALPIPASKGTVTFTAPKQINGSFDGGLKTYGRGVSCTGQAEGGDSDAVFSLADGATLSNVIIGEDQIEGIHCQGSCTLKNVWWAAVCEDALTLKKDGDATITGGGATGAEDKVIQHNGAGTVTIDGFQVADFGKLYRSCGNCKQSAERHVVVKNVKASNGKLLVGINPNFGDTATIDGTTCASSVKEICEEFQGTTQGNEPKSVSTGATDTCKFSPIASC
>ST47_g10359
[truncated: 2,181 more rows]

## Sheet: ArME14 secreted proteins
g16.t1	MLLILATLFCVSGPVTATTKPQACWRNSTCNGPSHPAFTGPWEAFNLAPKSRSVEPQTLLSLPNGAPLGNYNHNGTIIKASSDGVVFDFGLEVGGILSFEYAMNGNSTNASIGLAFTEAKDYVGRKSDNSNGGQGPDNALLYPLNTTREGSYIMPDVSLRGGFRYLTVFLLASPNESLTVRRVKLEISFQPTWPDLRAYQGYFHSSEPLLDKIWYSGAYTLQTNSVPGNTGRAKVQTDRVGWNNAAYIGPGDTVLLDGAKRDRWVWIGDMGTAVPAAFVSTGEMESTKNALRAIFDNQSADGTLPKAGPPYLSKDSDTYHLWALIGFYNYYLYTGDEIFVQNYWSKYVLGVNRMLGKIDSRGLVNVTGTADWGRWTYSSERSSASMLLYRALVTGSSIA…
[truncated: 1,144 more rows]

[truncated: 5 more sheets: ArME14 secreted fasta, ArD2 Sec not in ArME14, ArME14 Sec not in ArD2, ArD2 Transcription factors, Interpro ArME14 TFs not in ArD2]
